# Supplementary material
Source: Research Square preprint supplement (doi:10.21203/rs.3.rs-9122986/v1)
Supplement: Supplementary file 1 [file 52b1c763386f77ba19d18d8b.docx]

**Supplementary figures:**


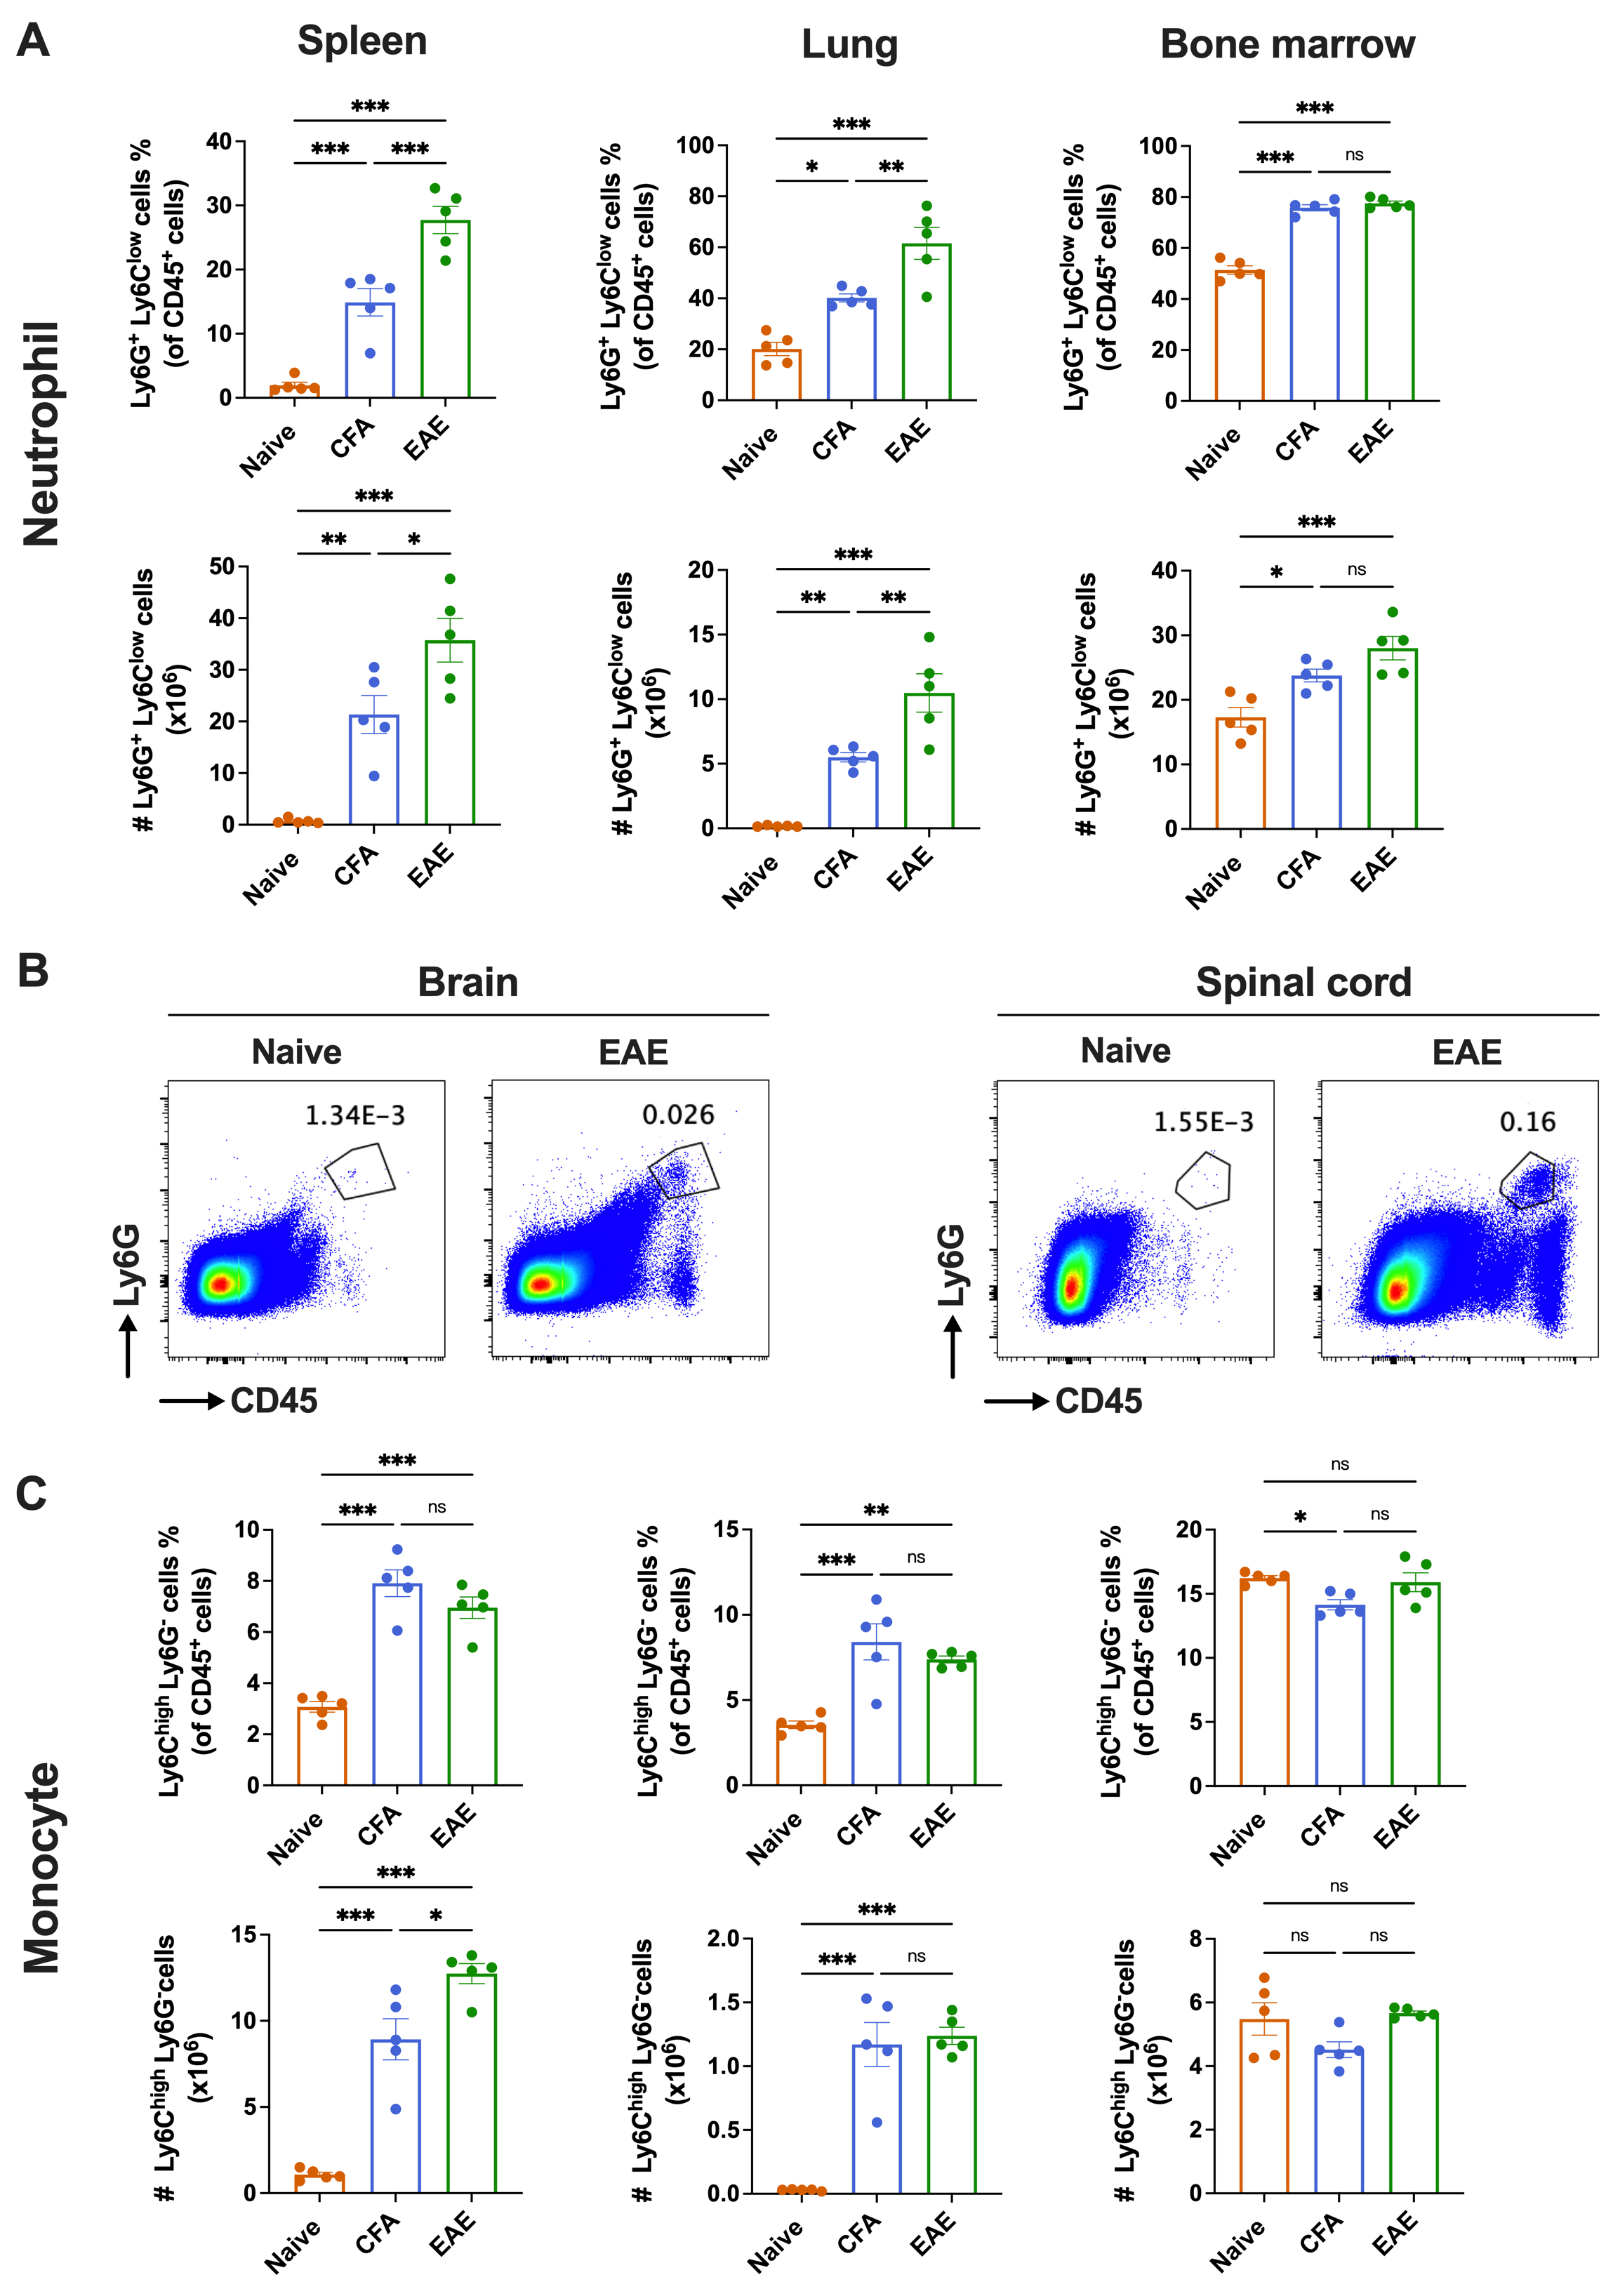


**Fig. S1. Expansion of neutrophils in EAE mice.** Naïve C57BL/6 mice were immunized with either complete Freund's adjuvant (CFA) alone or MOG35-55 emulsified in CFA. The frequency and absolute number of Ly6G⁺ Ly6Clow neutrophils **(A)** and Ly6Chigh Ly6G⁻ monocytes **(C)** were analyzed in the spleen, lung, and bone marrow of naïve, CFA-immunized, and MOG35-55-immunized mice (n = 5). **(B)** Representative flow cytometric plots showing the expansion of neutrophils in the brain and spinal cord of EAE mice at the peak stage. Data are means ± SEM. Statistical significance was calculated using One-way ANOVA with Tukey’s multiple comparison test (A and C). **P* < 0.05, ** *P* < 0.01, and ****P* < 0.001.


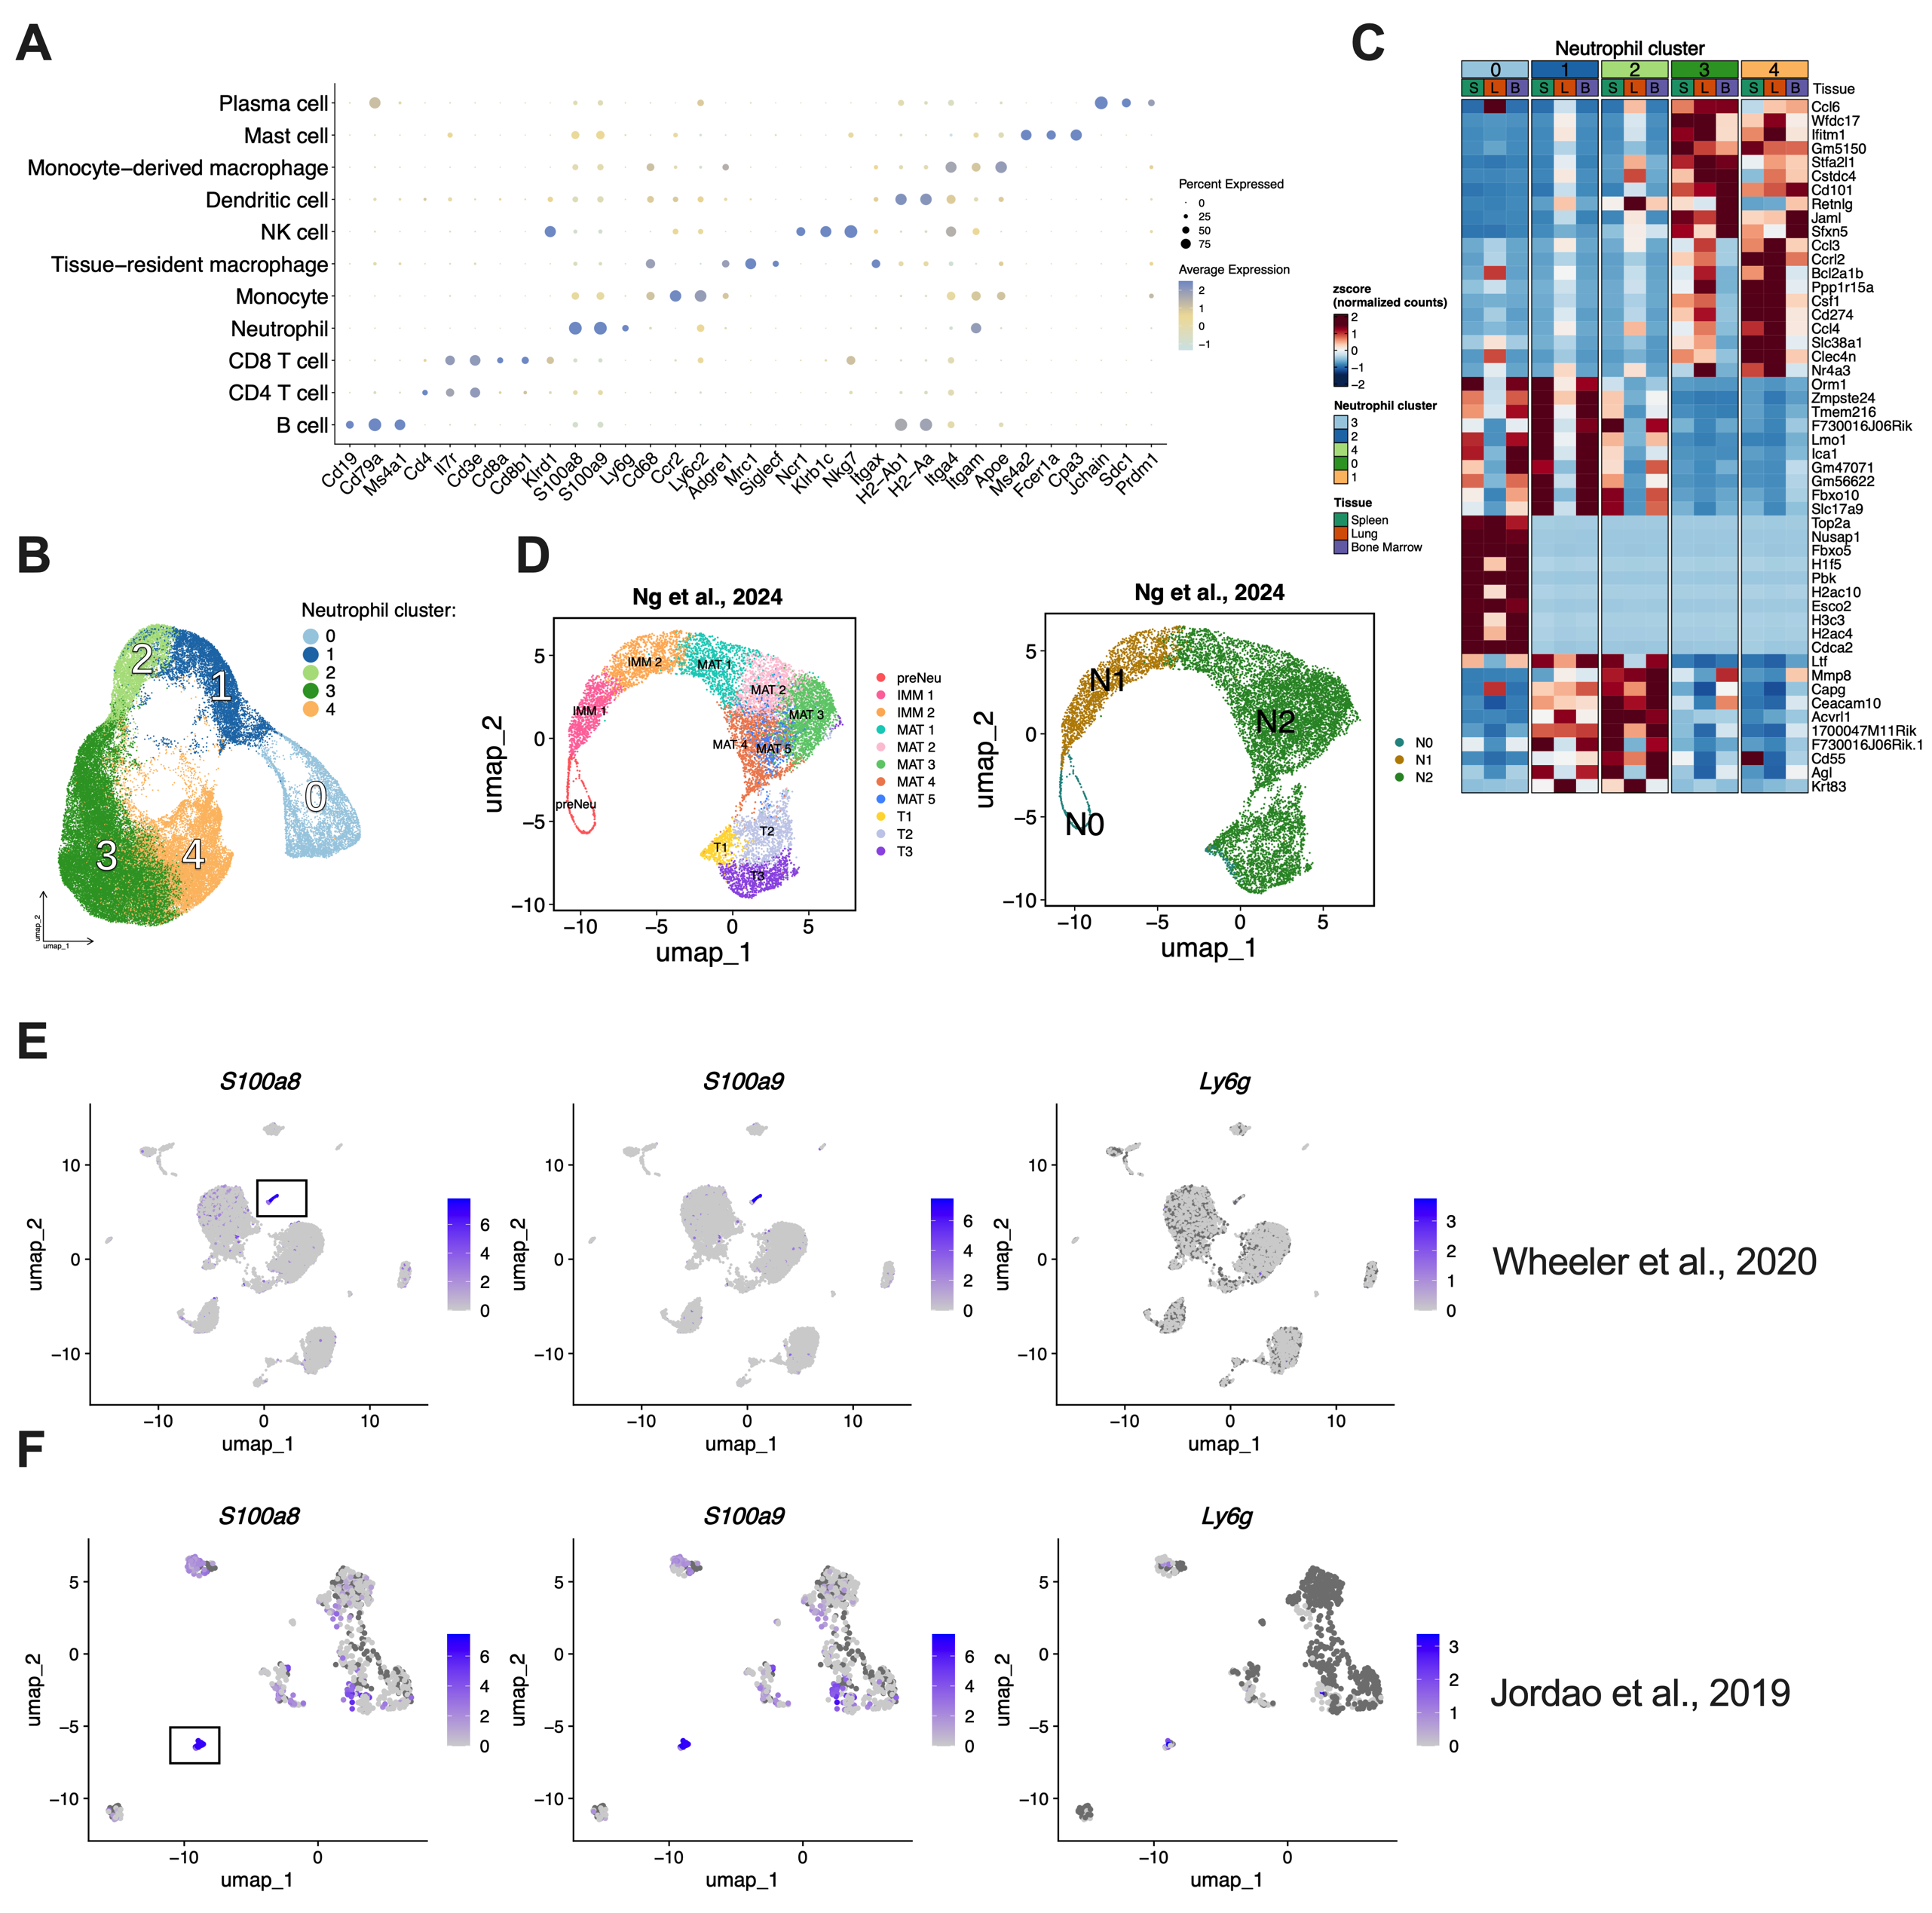


**Fig. S2.** **Identification of immune cell types and neutrophil subsets.** **(A)** Dot plot showing the scaled expression of selected canonical marker genes for cell type annotation. **(B)** UMAP plot of neutrophils extracted from the integrated dataset, following a separate dimensionality reduction and reclustering to define neutrophil subclusters. **(C)** Heatmap displaying the scaled expression of the top 10 marker genes for each neutrophil cluster. **(D)** Neutrophil subsets identified in our dataset were compared with those reported by Ng et al. by transferring our labels onto their datasets. **(E-F)** UMAP visualization of *S100a8*, *S100a9*, and *Ly6g* expression in CNS immune cells from EAE mice after re-analysis of datasets from Wheeler et al. (E) and Jordão et al. (F).


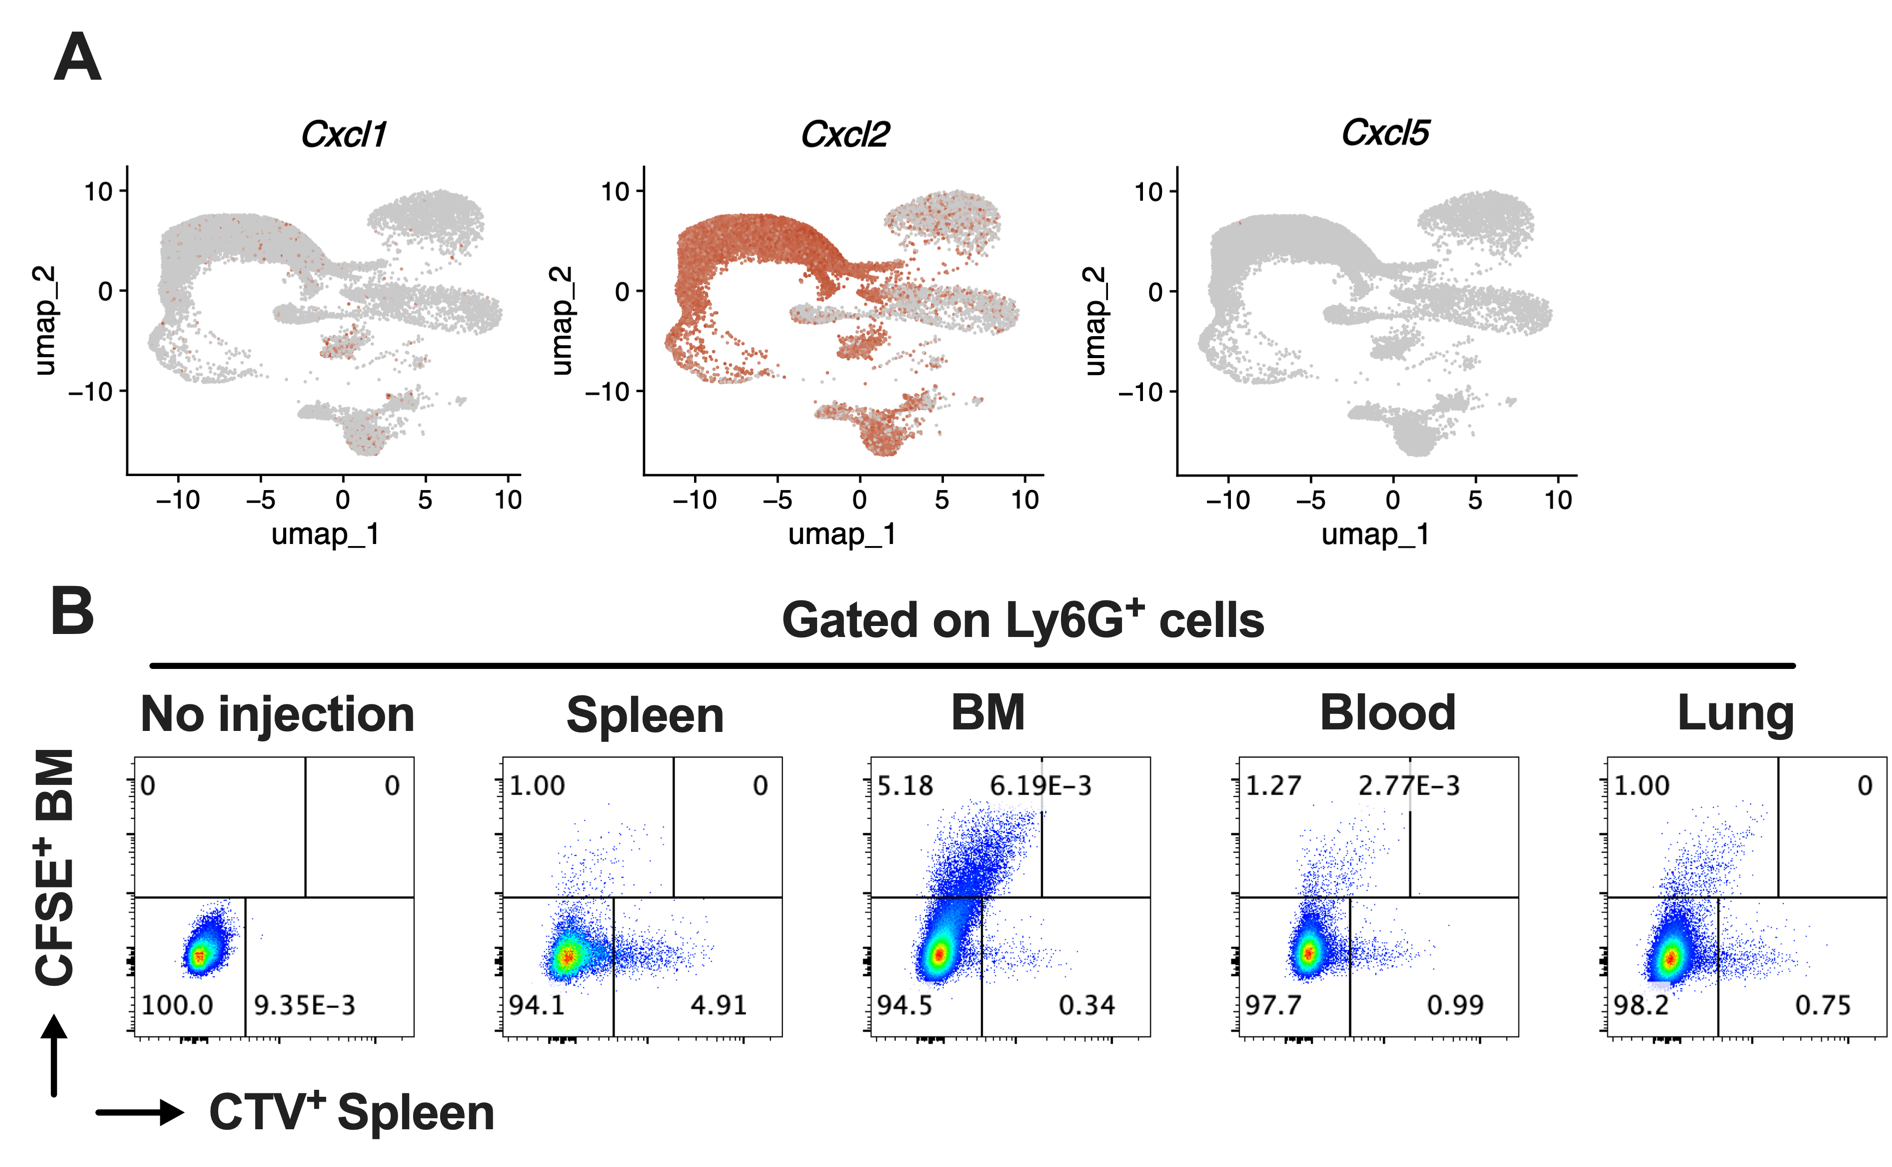


**Fig. S3.** **Chemokine expression in lung immune cells and short-term trafficking of spleen- and bone marrow-derived neutrophils in EAE mice**

**(A)** UMAP plots depicting the expression of *Cxcl1,* *Cxcl2*, and *Cxcl5* across lung immune cells. **(B)** Spleen and bone marrow of EAE mice were injected with CFSE and CellTrace Violet (CTV) dye, respectively. The proportions of CFSE⁺ and CTV⁺ neutrophils were analyzed in the spleen, BM, blood, and lung 5 hours post-injection.


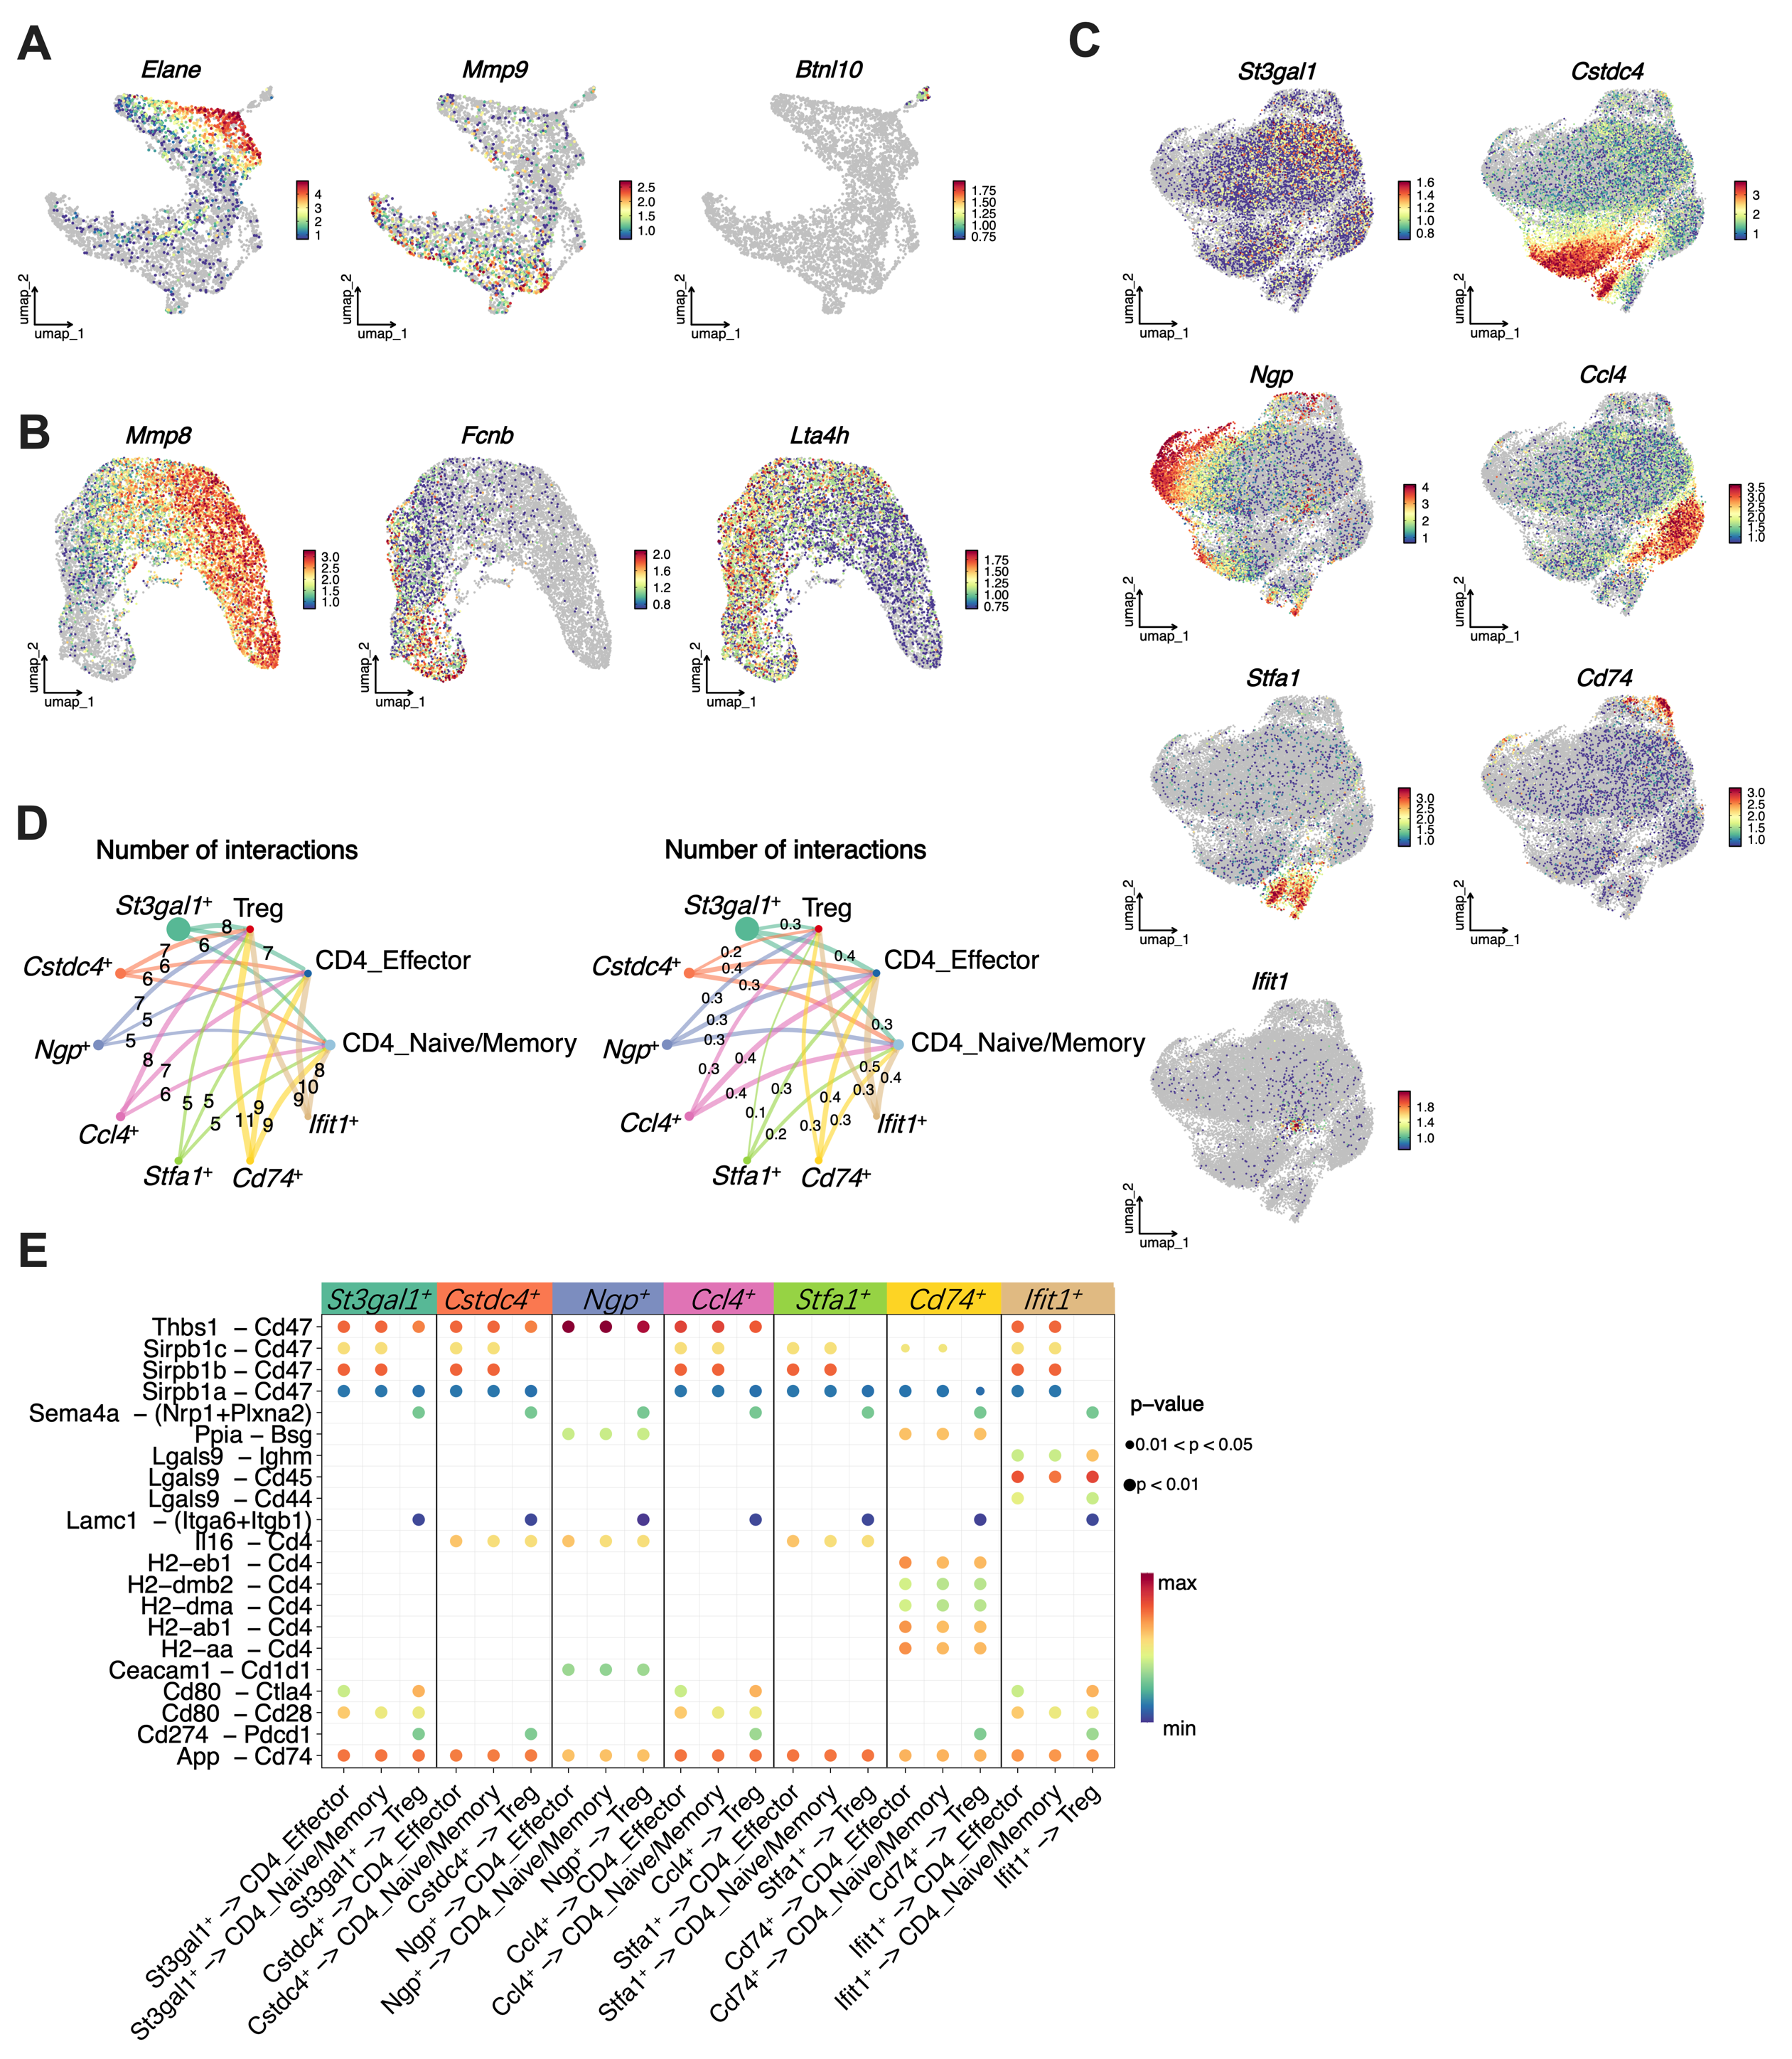


**Fig. S4. Sub-clustering of N0, N1, and N2 neutrophils and interactions with CD4⁺ T cells. (A)** UMAP plots showing marker gene expression in N0 sub-clusters: *Elane*, *Mmp9*, and *Btnl10*. **(B)** UMAP plots showing marker gene expression in N1 sub-clusters: *Mmp8*, *Fcnb*, and *Lta4h*. **(C)** UMAP plots showing marker gene expression in N2 sub-clusters: *St3gal1*, *Cstdc4*, *Ngp*, *Ccl4*, *Stfa1*, *Cd74*, and *Ifit1*. **(D)** Quantification of the number and strength of intercellular interactions between N2 neutrophil sub-clusters and CD4⁺ T cell subsets. **(E)** Key ligand-receptor pairs mediating interactions between N2 sub-clusters and CD4⁺ T cell subsets.
