# Supplementary material
Source: Research Square preprint supplement (doi:10.21203/rs.3.rs-9122986/v1)
Supplement: Supplementary file 2 [file 9d28ad9634c80cb12686da4c.xlsx]

## Sheet: Table S1. Gene lists
MDSC signature genes (Alshetaiwi et al.2020）	Neutrophil Maturation (Xie, Xuemei, et al.2020)	Positive regulation of apoptotic process (Xie, Xuemei, et al.2020)	Antibacterial (GO:0070944)	Degranulation (GO:0043315)	NETosis	positive regulation of phagocytosis (GO:0050766)	ROS production	Chemotaxis (GO:0071624)	APC (GO:0002504)	Immunosupressive (Cerezo-Wallis et al., 2026)	Glycolysis (GSEA MM3894)	positive regulation of neutrophil extravasation (GO:2000391)
Wfdc17	Retnlg	Eef1e1	Nlrp6	Cd177	Gla	Mfge8	Cyba	Mospd2	P01915	Tgfb1	Gys1	Adam8
Ifitm1	Ccl6	Prkci	Ctsg	Itgam	Rp11	Nod2	Cybb	Il23a	Fcer1g	Tgfb2	Vcan	Cd99
Il1b	S100a6	Sfpq	Dao	Itgb2	Anxa1	Pros1	Cyp1a1	Ccl21b	Marchf1	Vegfa	Vegfa	Cd99l2
BC100530	Clec4d	Rps7	F2	Itgb2l	Egr1	Ccl2	Cyp1a2	Ccl21e	B2m	Il10	Dsc2	Il1a
Srgn	Prr13	Nfkbid	F2rl1	Lypd10	Map4k5	Ager	Cyp1b1	Ccl21f	Pikfyve	Il4	Lct	Il1r1
Gm5483	Cebpb	Nlrp2	Myd88	Lypd11	Sema7a	Fcer1g	Ddah1	S100a14	Traf6	Il6	Tff3	Mdk
Stfa2l1	Slpi	Optn	Ncf1	Ptafr	C3ar1	Fcgr1	Duox1	Dnm1l	P04224	Il13	Hmmr	Pawr
Stfa2	S100a11	Dkkl1	Scnn1b		Cybb	mFcgr2	Duox2	Ccl21d	Marchf8	Il1a	Ier3	Ptger3
Prok2	Btg1	Dlc1	Cxcl5		H3f3c	Calr	Gbf1	Nckap1l	Ifi30	Mif	Gpc4	Ptger4
Ifitm2	Cxcr2	Acvr1c	Pcyox1l		Il18rap	C3	Hsp90aa1	Tirap	P20040	Csf1	Gpc3	Ripor2
Junb	Fth1	Adipoq	Elane		Klf2	C2	Mpo	C1qbp	H2-Aa	Rtf1	Gclc
Dusp1	Grina	Dnaja3	Trem1		Il1b	Btk	Ncf1	C3ar1	Lgmn	Ccl22	Il13ra1
Socs3	Mmp8	Nupr1	Trem3		Junb	Cyba	Nos1	C5ar1	P06344	Fgl2	G6pdx
Btg1	Fxyd5	Becn1	Tusc2		Map3k8	Rap1gap	Nos2	Cxcr2	Unc93b1	Osm	Chpf
1600014C10Rik	Msrb1	Acin1			Tnf	Ano6	Nos3	Ccr7	H2-Ab1	Gdf15	Efna3
Selplg	H2-D1	Robo1			Ccl4	Tulp1	P2rx4	Dapk2	Cd74	Cd274	Dld
Asprv1	Anxa2	Il20ra			Cxcl8	Trem2	Rora	Edn1	Ctse	Pdcd1l2	Pfkfb1
Igfbp6	Mmp9	Pak2			Prpf31	Cd300lf	Slc7a2	Ednra	Ctss	Cd276	Ext2
Gm5150	Ftl1	Bmf				Lyar	Sod1	Cd74	H2-Ob	Cd86	Aldh7a1
Pla2g7	Map1lc3b	P2rx7				Camk1d	Sod2	Il1b	H2-Oa	Cd70	Kif2a
Csf3r	Tmcc1	Cideb				Hspa8	Spr	Il4	H2-DMb2	Lgals1	Stc1
Cxcr2	Sat1	Tnfrsf12a				Bcr		Lbp	H2-DMb1	Lgals3	Irs2
Tpd52	Cyp4f18	Fgfr3				Pla2g5		Xcl1	H2-DMa	Lgals9	Cxcr4
Tspo	Junb	Ccar2				Myo18a		Mdk	H2-Eb2	Ido1	Rragd
Cyp4f18	Mxd1	Tnfrsf1a				Sirpa		Ccl21a	H2-Eb1	Ido2	Ankzf1
Grina	Stk17b	Tnfrsf22				Lbp		Ripor2	H2-Ea	Tdo2	Nsdhl
Fabp5	Ypel3	Cdk19				Slc11a1		Rac1	Arl8b	Arg1	Capn5
Clec4d	Selplg	Bok				Stap1		Rac2		Ptgs2	Elf3
Steap4	Il1f9	Wnt11				Ighg3		Sell		Nos2	Gpc1
Map1lc3b	Dusp1	E2f1				F2rl1		Mcu		Stat3	Kif20a
Ccr1	Slc16a3	Ddx20				Nckap1l		Thbs4		Stat5a	Bik
Lrg1	Ccr1	Gadd45g				Rab27a		Camk1d		Stat5b	Taldo1
Clec4e	Rdh12	Prelid1				Clec7a		Ccl19		Il6st	Tpst1
Ctsd	Clec4e	Bbc3				Cd209b		Dysf		Pim1	Cited2
Cd84	Arg2	Rbm5				Pparg		Ppbp		Socs3	Casp6
Gcnt2	Cd300ld	Ube2m				Plcg2		Perp			Hk2
Arg2	Amica1	Ccl12				Cfp					Slc37a4
BC117090	Ctsd	Tnfrsf1b				Sod1					Lhx9
Npl	Gda	Ripk1				Dock2					Stc2
Fgl2	Hacd4	Pparg				Il15					Ppp2cb
Rnf149	Timp2	Clip3				Rap1a					Cldn3
Sephs2	Fpr1	Fis1				Ptprc					Qsox1
S100a6	Ifi27l2a	Phlda3				Lrp1					Artn
Lmnb1	Slc7a11	Wdr35				Il15ra					Bpnt1
Amica1	Stfa2l1	Ptpn2				Ptx3					Cth
Eif4ebp1	Il1b	Pip5kl1				Rab31					Tpbg
Msrb1	Asprv1	Bace1				Rapgef1					Rbck1
Ubb	Cxcl2	Mybl2				Ptprj					Med24
C5ar1	Gm5483	Pik3cd				Cd47					Hs2st1
Ypel3	Ifitm1	Mcl1				Itga2					Psmc4
Fcgr3		Cdk5				Abca7					Hax1
Gsr		Pde5a				Sirpb1a					Plod2
Taldo1		Ralbp1				Mertk					Gnpda1
Atp6v1g1		Lpar1				Tlr2					Homer1
S100a11		Epha7				Sftpa1					Sdc1
Hp		Apbb2				Sftpd					Sdc3
Alox5ap		Melk				Prkaca					Sdc2
Litaf		Hif1a				Ptk2					Chst4
Txn1		Pdcd5				Pycard					Dpysl4
Upp1		Suds3				Colec10					Zfp292
AB124611		Bid				Apoa2					Slc25a10
Gpcpd1		Bin1				Gnas					Ero1a
Snap23		Ei24				Mex3b					Slc25a13
Il4ra		Hdac1				Gata2					Gne
Hist1h2bc		Hpgd				Gas6					Hs6st2
Retnlg		Zfp622				Stat3					Copb2
Myd88		Bag1				Ccr7					Nasp
Adipor1		Ccr5				Ighg1					Gal3st1
Stk17b		Pin1				Ighg2b					B4galt2
Zyx		Pias4				Ighg2a					Fut8
Rgs3		Frzb				Myh9					Pmm2
Il1f9		Sfrp4				Ifng					Ak3
Hdc		Traf7				Colec11					Aldh9a1
Atg3		Bad				Cd36					Angptl4
Gda		Klf11				Gpr18					Paxip1
Slc40a1		Tfpt				Ahsg					Ndufv3
Tarm1		Trp73				mFcn2					Chst2
Cdk2ap2		Ppp2ca				Tub					Arpp19
Stfa3		Rassf6				Apoa1					Miox
Glipr2		Ecscr				Appl2					Pfkp
Tacstd2		H2-M3				Abr					Cldn9
Picalm		P2rx1				Mbl2					Sdhc
Mtus1		Phlda1				Mbl1					Pgls
Fbxl5		Siah1a				Fpr2					Rpe
Slfn1		Ppp2r2b				Dnm2					Polr3k
Rnd1		Gapdh				Lman2					Rars1
Ier2		Gal				Il2rg					Nanp
Mxd1		Map3k11				Il2rb					Pkp2
Siglece		Map3k10				Fcgr3					Ppfia4
Cdkn2d		Map3k5				Arap1					Gmppa
Cd33		Map2k7									Galk2
Lilr4b		Map2k6									Fam162a
Cd14		Map2k4									Chpf2
Sell		Mapk9									Slc35a3
Ppt1		Mapk8									Ecd
Skap2		Slk									B3gat3
Sfxn5		Zbtb16									Abcb6
2810474O19Rik		Adam17									Gale
Ikbkap		Ctnnbl1									Ddit4
Hbb-bs		Diablo									Depdc1a
Atp11b		Folh1									Cog2
Cxcl2		Rhoa									Lhpp
Osm		E2f3									B3gat1
Ier3		Eef1a2									Chst1
Hba-a1		Cradd									Agl
		Cflar									Nol3
		Plagl2									Cyb5a
		Fas									B4galt4
		Nacc2									Cacna1h
		Ercc3									Isg20
		Ddx3x									Chst12
		Stat1									Sap30
		Maged1									Akr1a1
		Ppp1ca									Srd5a3
		Zc3h8									Chst5
		Tex261									Egln3
		Tnfrsf10b									Ndst3
		Sort1									Pgam2
		Mmp9									Tktl1
		Mmp2									Slc16a3
		Malt1									Gpr87
		Sirt1									Glrx
		Gsn									Glce
		Rassf2									Kdelr3
		Zmat3									Me2
		Pdia3									B3gnt3
		Grn									B3galt6
		Nr3c1									Cln6
		Grin2a									Ugp2
		Grin1									Pdk3
		Grik5									Alg1
		Grik2									B4galt7
		Ripk3									Gys2
		Trpv1									Spag4
		Sp110									Xylt2
		Ubb									Gmppb
		Rnf183									Eno1b
		Pou4f1									Agrn
		Trp53									Ak4
		Aifm2									Aldoa
		Syk									Aldob
		Jmy									Ang
		Khdc1a									Cd44
		Pawr									Cdk1
		Cyp1b1									Cenpa
		Cyct									Col5a1
		Cycs									P4ha2
		Ctsd									Ext1
		Ctrb1									Aurka
		Ctla4									Dcn
		Nod1									Egfr
		Cryba1									Eno2
		Nlrc4									Fbp2
		Prmt2									Fkbp4
		Ppp2r1a									Gapdhs
		Neurl1a									Gfpt1
		Musk									B4galt1
		Fndc1									Galk1
		Zc3h12a									Got1
		Rnf122									Got2
		Casp2									Hspa5
		Ncf2									Gusb
		Stk17b									Idh1
		Myc									Idua
		Foxo3									Igfbp3
		Foxo1									Stmn1
		Tnfsf10									Ldha
		Dapk3									Ldhc
		Hdac4									Mertk
		Xdh									Met
		Xbp1									Mif
		Wt1									Me1
		Wnt5a									Mdh2
		Wnt3a									Mdh1
		Rbm10									Mpi
		Rgcc									Mxi1
		Casp12									P4ha1
		Casp6									Pam
		Casp9									Pcx
		Styxl1									Pgam1
		Gsk3b									Pgk1
		Top2a									Pgm2
		Neurod1									Phka2
		Timp3									Pkm
		Sfrp1									Ppia
		Tgm2									Prps1
		Tgfb3									Pygb
		Tgfb2									Pygl
		Tgfb1									Sod1
		Traf2									Sox9
		F2r									Tgfa
		Srpx									Tpi1
		Rps27l									Gfus
		Slc11a2									Txn1
		Wwox									Vldlr
		Camk2d									Hdlbp
		Pla2g4a									Adora2b
		Zfp819									Nt5e
		Trpm7									Plod1
		Dhodh									Tgfbi
		Pou4f2
		Atf4
		Pdcd6
		Psen2
		App
		Pea15a
		Tnf
		Lta
		Apc
		Prkdc
		Erbb4
		Osm
		Cdkn2a
		Dnaja1
		Gsdma3
		Ascl1
		Nqo2
		Lyn
		Ltk
		Mybbp1a
		Gramd4
		Ctnna1
		Capn2
		Capn1
		Camk2b
		Camk2a
		S100a8
		C6
		Tspo
		Btg1
		Scin
		Lats2
		Ip6k2
		Ager
		Spop
		Plscr1
		St18
		Creb1
		Prkra
		Rbck1
		Col18a1
		Clu
		Hip1
		Inca1
		Eif2s1
		Pak3
		Ppm1f
		Tyrobp
		Cxcr3
		Hcar2
		Eif5a
		Sphk2
		Ripk2
		Stk3
		Anxa5
		Bmp4
		Slc9a1
		Rest
		Bcl2l1
		Ltbr
		Bnip3l
		Src
		Dap
		Nox4
		Ccl5
		Ccl3
		Scp2
		Ppargc1a
		Slc9a3r1
		Rxra
		Serinc3
		Foxl2
		Aifm1
		Fadd
		Hrk
		Dapk1
		Dab2ip
		Cyld
		Cdc34
		Esr2
		Col4a3
		Tfap2b
		Tfap2a
		Lep
		Htra2
		F3
		Csrnp3
		Htt
		Cdk4
		Tfap4
		Cd44
		Cd40lg
		Cd40
		Cd24a
		Spdef
		Snca
		Aldh1a3
		Tlr4
		Anxa1
		Nlrp1a
		Tomm40
		Sh3glb1
		Dnm1l
		Lck
		Pxt1
		Cav1
		Faf1
		Hspd1
		Hsf1
		Foxa1
		Hyal2
		4930453N24Rik
		Dusp6
		Pml
		Ptprf
		Bcap31
		Irf5
		Runx3
		Bub1
		Gzma
		Ddit3
		Unc5b
		Msx1
		Msx2
		Ceacam1
		Tnfaip8
		Prr7
		Pitx3
		Trps1
		Dedd2
		Sirt2
		Net1
		Sav1
		Nfatc4
		Id3
		Plekhn1
		Fap
		Nck1
		Igfbp3
		Igf2r
		Ido1
		Bik
		Tomm22
		Cd274
		Pycard
		Moap1
		Adamtsl4
		Usp27x
		Jun
		Hoxa13
		Hoxa5
		Itpr1
		Itgb1
		Fnip1
		Itgam
		Itga6
		Itga4
		Gsk3a
		Ndufa13
		Rps6ka2
		Unc13b
		Steap3
		Trp53inp1
		Ankrd1
		Degs1
		Bcl2l10
		Trp63
		Inhbb
		Inhba
		Il6
		Casp1
		Il1b
		Il12b
		Nr4a3
		Il12a
		Il10
		Pdcd7
		Atf3
		Pla2g6
		Ptrh2
		Atf2
		Rapgef2
		Bnip3
		Jak2
		Hmox1
		Hmgcr
		Il19
		Tnfsf12
		Klrk1
		Dffa
		Atf6
		Ccar1
		Pten
		Ptgis
		Map3k9
		Bak1
		Ctsc
		Adam10
		Pink1
		Stpg1
		Atpif1
		Ppid
		Fbxo32
		Pdcd2
		Pmaip1
		Cnr1
		Rps6
		Khdc1c
		Casp8ap2
		Bcl10
		Eif2b5
		Atg7
		Nlrp1b
		Arrb2
		Arrb1
		Mef2c
		Ifit2
		Rapsn
		Chek2
		Adora2a
		Smad4
		Plekhf1
		Cd160
		Ubd
		Alox12
		Akt1
		Bcl2l11
		Capn10
		G0s2
		Men1
		Tctn3
		Hdac3
		Ntsr1
		Ntrk3
		Fbxw7
		Notch2
		Notch1
		Nos3
		Nkx3-1
		Nsmaf
		Ngfr
		Ngf
		Eif2ak3
		Nox1
		Rad9a
		Ppp2r1b
		Camk1d
		Acer2
		S100b
		Prkcd
		Khdc1b
		Pik3cb
		Aldh1a1
		Pdgfrb
		Ect2
		Eif2ak2
		Egr1
		Egln1
		Dusp1
		Itm2c
		Abl1
		Card9
		Ing3
		Usp7
		Sod1
		Mtch2
		Gzmk
		Lrp6
		Zfp13
		Pdcd1
		S100a9
		Ncoa1
		Rnps1
		Pidd1
		Ptprc
		Stk4
		Akap12
		Vdr
		Ptgs2
		Bclaf1
		Prnp
		Nck2
		Muc2
		Siva1
		Cxcr2
		Agtr2
		Agt
		Agrn
		Adrb2
		Adrb1
		Efhc1
		Zswim2
		Psen1
		Nodal
		Smad3
		Mal
		Trim35
		Osgin1
		Ace
		Ube2z
		Prdm11
		Trp53bp2
		Spink2
		Apaf1
		Nlrp3
		Brms1
		Fam162a
		Plcg1
		Plaur
		Bard1
		Cdk5r1
		Ptn
		Ret
		Txnip
		Rpl26
		Zfp346
		Cd248
		Rybp
		Rarg
		Rarb
		Sox7
		Sox4
		Sod2
		Smpd1
		Ctsz
		Siglec1
		Gper1
		Casp14
		Shq1
		Ctsh
		Tcf7l2
		Mff
		Tgfbr1
		Thbs1
		Atm
		Mllt11
		Lats1
		Nr4a1
		Dcun1d3
		Rnf7
		Chchd10
		Rps29
		Uaca
		Ifnb1
		Ifng
		Scimp
		Rpl11
		Tnfsf15
		Adcy10
		C1qbp
		Atp2a3
		Bmp2
		Mtch1
		Jak3
		Kcnma1
		Cck
		Akr1c18
		Fam72a
		Pdcd4
		Unc5c
		Nqo1
		Tpd52l1
		Endog
		Bcl2l14
		Casp8
		Mfn2
		Gpld1
		Smpd2
		Ano6
		Senp1
		Ppif
		Nell1
		Pcsk9
		Adam8
		Il24
		Skil
		Cdc42
		Calhm2
		Gadd45a
		Gadd45b
		Apbb1
		Ddx19a
		Bmpr1b
		Bcl6
		Fosl1
		Srpk2
		Arhgef7
		Adm
		Wnt10b
		Ing5
		Sfrp2
		Olfm1
		Arl6ip5
		Hip1r
		Scrib
		Taf6
		Tsc22d1
		Trim39
		Rhob
		Il18
		Aldh1a2
		Itga1
		Tia1
		Park7
		Slit2
		Tigar
		Rrp1b
		Tnfrsf8
		Rps3
		Gata6
		Fank1
		Ctnnb1
		Syce3
		Bax
		Inpp5d
		Ing4
		Flcn
		Casp3
		Fasl
		Casp4
		Nf1
		Mul1
		Ift57
		Daxx
		Tnfrsf26
		Vcp
		B4galt1
		Bmp7

## Sheet: Table S2. DEGs for each subset
Gene	p_val	avg_log2FC	pct.1	pct.2	p_val_adj	entrez	Group
Stmn1	0	7.08092	0.968	0.03	0	16765	N0
Tubb5	0	5.85661	0.963	0.058	0	22154	N0
Pclaf	0	8.05365	0.903	0.01	0	68026	N0
Birc5	0	6.98875	0.892	0.015	0	11799	N0
Tuba1b	0	6.52509	0.891	0.025	0	22143	N0
Anp32b	0	4.6572	0.97	0.11	0	67628	N0
Top2a	0	8.19694	0.847	0.009	0	21973	N0
Ran	0	4.44394	0.93	0.093	0	19384	N0
Mki67	0	6.12523	0.856	0.029	0	17345	N0
Lsm5	0	3.96716	0.892	0.092	0	66373	N0
Snrpd1	0	4.89584	0.83	0.052	0	20641	N0
Smc4	0	4.20076	0.866	0.089	0	70099	N0
Snrpe	0	3.50573	0.919	0.156	0	20643	N0
Cdk1	0	8.18856	0.762	0.005	0	12534	N0
Smc2	0	7.36923	0.747	0.007	0	14211	N0
Snrpg	0	3.1788	0.925	0.186	0	68011	N0
Hint1	0	3.71894	0.832	0.093	0	15254	N0
Cdca8	0	7.05886	0.746	0.009	0	52276	N0
Ube2c	0	7.67019	0.747	0.014	0	68612	N0
Cdca3	0	6.97169	0.741	0.009	0	14793	N0
Nucks1	0	5.16269	0.753	0.033	0	98415	N0
Sumo2	0	3.21873	0.948	0.236	0	170930	N0
Fcnb	0	4.72784	0.779	0.072	0	14134	N0
Tagln2	0	2.74806	0.918	0.218	0	21346	N0
Dek	0	4.35977	0.767	0.068	0	110052	N0
Cks1b	0	6.6009	0.704	0.01	0	54124	N0
Rrm2	0	8.03038	0.699	0.006	0	20135	N0
Nusap1	0	8.38302	0.694	0.004	0	108907	N0
H2az2	0	3.97729	0.806	0.127	0	77605	N0
Tmpo	0	3.27982	0.798	0.125	0	21917	N0
Srsf3	0	2.775	0.913	0.244	0	20383	N0
Cenpa	0	4.30501	0.734	0.071	0	12615	N0
Cebpe	0	2.95106	0.839	0.178	0	110794	N0
Hnrnpab	0	3.62287	0.744	0.09	0	15384	N0
Ndufa4	0	2.58106	0.969	0.317	0	17992	N0
Rpl36al	0	2.74172	0.841	0.189	0	66483	N0
H2ax	0	6.06522	0.675	0.025	0	15270	N0
Anp32e	0	4.88593	0.682	0.034	0	66471	N0
Atp5g2	0	3.19048	0.768	0.121	0	NA	N0
Kif11	0	7.90465	0.644	0.004	0	16551	N0
Rnaseh2c	0	2.417	0.869	0.236	0	68209	N0
Dbi	0	3.69179	0.727	0.095	0	13167	N0
Alyref	0	3.51141	0.717	0.085	0	21681	N0
Rps17	0	2.79047	0.91	0.283	0	20068	N0
Ptma	0	4.28201	0.999	0.374	0	19231	N0
Kif15	0	7.7323	0.628	0.004	0	209737	N0
Hnrnpa3	0	2.57538	0.94	0.316	0	229279	N0
Cbx3	0	3.94705	0.685	0.063	0	12417	N0
Lsm6	0	3.2716	0.712	0.092	0	78651	N0
Aprt	0	2.40564	0.891	0.273	0	11821	N0
Rpl3	0	3.04858	0.828	0.211	0	27367	N0
Bub3	0	3.72042	0.69	0.077	0	12237	N0
Hmgb1	0	3.36473	0.993	0.382	0	15289	N0
Lta4h	0	2.16124	0.828	0.219	0	16993	N0
Gmnn	0	5.68762	0.622	0.017	0	57441	N0
Ccna2	0	7.90831	0.606	0.003	0	12428	N0
Tubb4b	0	3.16034	0.759	0.16	0	227613	N0
Serpinb1a	0	2.42458	0.898	0.299	0	66222	N0
Serbp1	0	2.85284	0.737	0.139	0	66870	N0
Hpf1	0	4.2915	0.642	0.044	0	72612	N0
Banf1	0	4.80114	0.624	0.028	0	23825	N0
Tmem256	0	3.39469	0.687	0.095	0	69186	N0
Snrpf	0	3.95319	0.65	0.06	0	69878	N0
Tuba4a	0	2.55163	0.857	0.267	0	22145	N0
Ranbp1	0	5.15391	0.612	0.027	0	19385	N0
Tpx2	0	7.19782	0.59	0.006	0	72119	N0
Pgp	0	3.67019	0.656	0.076	0	67078	N0
Dtymk	0	5.04845	0.607	0.028	0	21915	N0
Spc24	0	6.80578	0.586	0.007	0	67629	N0
Dut	0	7.1063	0.587	0.01	0	110074	N0
Pgls	0	2.59227	0.744	0.168	0	66171	N0
Atpif1	0	2.49322	0.789	0.216	0	NA	N0
Nap1l1	0	3.17983	0.67	0.097	0	53605	N0
Uqcrb	0	2.41771	0.769	0.198	0	67530	N0
Cdkn3	0	5.37868	0.587	0.017	0	72391	N0
Rpl22l1	0	2.46851	0.774	0.205	0	68028	N0
Ybx1	0	2.21509	0.898	0.33	0	22608	N0
Hnrnpa2b1	0	2.13771	0.905	0.337	0	53379	N0
Mrpl18	0	3.44828	0.639	0.073	0	67681	N0
Ppia	0	3.59876	0.997	0.434	0	268373	N0
H1f4	0	4.53646	0.618	0.055	0	50709	N0
Pcbp1	0	2.05047	0.786	0.226	0	23983	N0
U2af1	0	2.29138	0.747	0.188	0	108121	N0
Incenp	0	4.82246	0.587	0.028	0	16319	N0
Prc1	0	7.48468	0.56	0.004	0	233406	N0
Smc1a	0	3.20018	0.644	0.089	0	24061	N0
Racgap1	0	6.9306	0.56	0.006	0	26934	N0
E2f8	0	5.58467	0.569	0.016	0	108961	N0
Chil3	0	2.95493	0.92	0.372	0	12655	N0
Srsf2	0	2.31205	0.734	0.186	0	20382	N0
Rps18	0	2.88139	0.95	0.402	0	20084	N0
Fbxo5	0	8.57116	0.548	0.002	0	67141	N0
Snrpb	0	2.49549	0.7	0.154	0	20638	N0
Ccnb2	0	4.94654	0.567	0.022	0	12442	N0
Orm1	0	2.58884	0.658	0.115	0	18405	N0
Ndufc2	0	3.21902	0.62	0.077	0	68197	N0
Srsf7	0	2.60754	0.68	0.138	0	225027	N0
H1f5	0	8.36632	0.544	0.003	0	56702	N0
Lockd	0	6.44715	0.544	0.008	0	381822	N0
Rpl10a	0	2.99936	0.732	0.196	0	19896	N0
Rad21	0	2.50408	0.703	0.167	0	19357	N0
Rpsa	0	3.00438	0.962	0.427	0	16785	N0
1700020L24Rik	0	3.85568	0.588	0.053	0	66330	N0
Rpa3	0	4.83976	0.558	0.024	0	68240	N0
Ncapg2	0	4.53775	0.563	0.03	0	76044	N0
Asf1b	0	7.63268	0.534	0.003	0	66929	N0
Ncam1	0	2.99635	0.633	0.102	0	17967	N0
H4c4	0	5.95075	0.548	0.017	0	319156	N0
Sptssa	0	3.56276	0.585	0.058	0	104725	N0
Naca	0	2.05047	0.898	0.373	0	17938	N0
Cep128	0	3.3144	0.598	0.073	0	75216	N0
Pcna	0	3.5538	0.629	0.105	0	18538	N0
Rps27l	0	2.36204	0.695	0.171	0	67941	N0
Neil3	0	5.74706	0.534	0.012	0	234258	N0
Hdgf	0	3.75424	0.575	0.053	0	15191	N0
Lsm3	0	2.85002	0.618	0.098	0	67678	N0
Ms4a3	0	5.41177	0.549	0.029	0	170813	N0
Set	0	3.32742	0.59	0.072	0	56086	N0
Tacc3	0	6.55551	0.525	0.007	0	21335	N0
Rrm1	0	6.2533	0.526	0.009	0	20133	N0
H2ac8	0	6.92701	0.528	0.011	0	319166	N0
Spc25	0	7.60273	0.518	0.003	0	66442	N0
Tfdp1	0	2.37619	0.666	0.151	0	21781	N0
Tmed3	0	3.3563	0.596	0.081	0	66111	N0
Rpl36a	0	2.81811	0.717	0.205	0	19982	N0
Tipin	0	6.7653	0.517	0.006	0	66131	N0
Mrpl57	0	2.56708	0.629	0.118	0	67840	N0
Rpl7a	0	2.02448	0.891	0.382	0	27176	N0
Pde4d	0	2.06629	0.717	0.208	0	238871	N0
1810037I17Rik	0	2.15995	0.951	0.443	0	67704	N0
Nasp	0	4.06743	0.549	0.042	0	50927	N0
Siva1	0	3.39767	0.588	0.082	0	30954	N0
Ckap5	0	4.38642	0.537	0.032	0	75786	N0
Ndufb3	0	2.09331	0.703	0.201	0	66495	N0
Rps15	0	2.07668	0.848	0.346	0	20054	N0
Atp5g3	0	2.45291	0.646	0.145	0	NA	N0
Mrpl51	0	3.49922	0.557	0.058	0	66493	N0
Ccdc34	0	5.74552	0.511	0.012	0	68201	N0
Rps19	0	2.64816	0.964	0.465	0	20085	N0
Dpy30	0	4.26263	0.532	0.034	0	66310	N0
Rack1	0	2.30257	0.787	0.291	0	14694	N0
Atad2	0	4.69547	0.521	0.027	0	70472	N0
Rps20	0	2.70586	0.982	0.491	0	67427	N0
Rbbp4	0	2.55518	0.618	0.128	0	19646	N0
Nsd2	0	4.40819	0.522	0.032	0	107823	N0
Dnajc9	0	5.45916	0.504	0.014	0	108671	N0
Smc6	0	4.2661	0.517	0.03	0	67241	N0
Ddx39b	0	3.01207	0.564	0.078	0	53817	N0
Nudt21	0	3.77312	0.53	0.045	0	68219	N0
Rbm3	0	2.22916	0.981	0.497	0	19652	N0
Etfb	0	3.25559	0.557	0.076	0	110826	N0
Rpl4	0	2.36818	0.675	0.194	0	67891	N0
Hjurp	0	2.40567	0.612	0.131	0	381280	N0
Rpl14	0	2.59285	0.729	0.248	0	67115	N0
Jpt1	0	2.58621	0.619	0.138	0	15374	N0
Hmgn2	0	3.10733	0.987	0.507	0	15331	N0
Mcm7	0	6.15145	0.486	0.009	0	17220	N0
Fkbp2	0	3.78814	0.515	0.041	0	14227	N0
Dnmt1	0	4.70873	0.5	0.026	0	13433	N0
Atp5o	0	2.55279	0.589	0.115	0	NA	N0
H2ac24	0	6.48811	0.481	0.009	0	319171	N0
Rpl15	0	2.28963	0.925	0.454	0	66480	N0
Usp1	0	4.60392	0.491	0.023	0	230484	N0
Topbp1	0	4.72393	0.49	0.022	0	235559	N0
Ezh2	0	4.94909	0.488	0.021	0	14056	N0
Cenpf	0	7.22035	0.472	0.006	0	108000	N0
Arl6ip1	0	2.47515	0.763	0.299	0	54208	N0
Slbp	0	2.82946	0.568	0.104	0	20492	N0
Rpl12	0	2.57969	0.675	0.216	0	269261	N0
Sarnp	0	2.03321	0.617	0.158	0	66118	N0
Rpl6	0	2.00767	0.918	0.461	0	19988	N0
Rpl32	0	2.58215	0.986	0.529	0	19951	N0
Commd1	0	2.33197	0.58	0.124	0	17846	N0
Hprt	0	2.81023	0.543	0.089	0	NA	N0
Ncapd3	0	5.50674	0.466	0.012	0	78658	N0
Hnrnpd	0	2.4093	0.585	0.132	0	11991	N0
Mrps14	0	2.34241	0.571	0.12	0	64659	N0
Rpl35	0	2.25264	0.662	0.212	0	66489	N0
Ncapd2	0	6.9308	0.453	0.004	0	68298	N0
Rps5	0	2.23169	0.938	0.492	0	20103	N0
Tyms	0	7.44979	0.449	0.004	0	22171	N0
Cenpx	0	3.11579	0.498	0.063	0	20892	N0
Rpl5	0	2.17311	0.663	0.23	0	100503670	N0
Tpr	0	2.02167	0.589	0.156	0	108989	N0
Pnp	0	2.37669	0.556	0.126	0	18950	N0
Lsm8	0	2.38361	0.541	0.113	0	76522	N0
Hmmr	0	6.36176	0.433	0.006	0	15366	N0
Ssrp1	0	4.89002	0.444	0.018	0	20833	N0
Knl1	0	6.46643	0.432	0.006	0	76464	N0
Rps6	0	2.05453	0.852	0.426	0	20104	N0
Lig1	0	6.55807	0.429	0.006	0	16881	N0
Hnrnpa1	0	2.89093	0.505	0.086	0	15382	N0
Ndufa11	0	2.36306	0.527	0.108	0	69875	N0
Rpl22	0	2.08094	0.814	0.395	0	19934	N0
Ndufb5	0	2.39273	0.524	0.106	0	66046	N0
Ssna1	0	2.51904	0.516	0.099	0	68475	N0
Lsm2	0	4.41803	0.439	0.023	0	27756	N0
Rps4x	0	2.23468	0.941	0.525	0	20102	N0
Ywhaq	0	2.47948	0.509	0.094	0	22630	N0
Aurkb	0	7.83765	0.417	0.002	0	20877	N0
Nsmce1	0	3.28424	0.465	0.052	0	67711	N0
Rnf7	0	2.16033	0.54	0.129	0	19823	N0
Vdac3	0	2.96024	0.477	0.066	0	22335	N0
Uhrf1	0	6.86999	0.415	0.005	0	18140	N0
Snrpd2	0	2.57674	0.504	0.095	0	107686	N0
Actn4	0	2.18093	0.538	0.129	0	60595	N0
Hmgb3	0	5.79237	0.418	0.009	0	15354	N0
Cdc20	0	6.21678	0.415	0.007	0	107995	N0
Cmc2	0	4.46497	0.428	0.02	0	66531	N0
Nsmce4a	0	2.65767	0.486	0.079	0	67872	N0
Orc6	0	4.88486	0.424	0.017	0	56452	N0
Diaph3	0	6.42851	0.413	0.006	0	56419	N0
Anapc5	0	3.67562	0.446	0.04	0	59008	N0
Arhgap19	0	3.54252	0.448	0.046	0	71085	N0
Camp	0	2.3517	0.907	0.509	0	12796	N0
Cit	0	6.69278	0.401	0.004	0	12704	N0
Cenpe	0	6.35678	0.4	0.006	0	229841	N0
Hmgn2-ps	0	2.84064	0.471	0.077	0	100042405	N0
Ndufc1	0	2.42838	0.486	0.094	0	66377	N0
Cenpw	0	5.70752	0.4	0.009	0	66311	N0
Kif23	0	2.53088	0.472	0.082	0	71819	N0
Npm1	0	2.74381	0.498	0.11	0	18148	N0
Smc3	0	3.14273	0.442	0.055	0	13006	N0
Mcm5	0	6.33874	0.392	0.006	0	17218	N0
Pcbd2	0	2.3717	0.481	0.095	0	72562	N0
Ctcf	0	2.61687	0.47	0.086	0	13018	N0
Cdkn2c	0	5.97008	0.39	0.007	0	12580	N0
Elof1	0	3.21014	0.437	0.055	0	66126	N0
Syne2	0	2.41602	0.485	0.103	0	319565	N0
Cdc25a	0	4.73131	0.398	0.017	0	12530	N0
Timm13	0	2.50116	0.469	0.088	0	30055	N0
Pbrm1	0	2.19486	0.502	0.121	0	66923	N0
Ska1	0	7.78248	0.383	0.002	0	66468	N0
Ndufv2	0	2.37101	0.473	0.094	0	72900	N0
Mcm3	0	6.3474	0.382	0.005	0	17215	N0
Psmc3	0	2.55551	0.459	0.082	0	19182	N0
Pbk	0	8.98362	0.376	0.001	0	52033	N0
Dbf4	0	4.73244	0.39	0.016	0	27214	N0
Atp5g1	0	2.75272	0.46	0.086	0	NA	N0
Id1	0	2.17113	0.5	0.128	0	15901	N0
H2ac10	0	8.84842	0.372	0.001	0	319173	N0
Zfp367	0	4.7554	0.388	0.017	0	238673	N0
Ndufab1	0	3.04105	0.425	0.056	0	70316	N0
Rfwd3	0	3.68018	0.403	0.034	0	234736	N0
Selenoh	0	4.73389	0.387	0.019	0	72657	N0
Suz12	0	2.49114	0.46	0.092	0	52615	N0
Thoc7	0	2.8253	0.434	0.066	0	66231	N0
mt-Nd1	0	2.12005	0.627	0.259	0	NA	N0
Rpia	0	3.1817	0.417	0.05	0	19895	N0
Lsm4	0	2.1806	0.479	0.112	0	50783	N0
H1f3	0	6.47962	0.37	0.006	0	14957	N0
Gatm	0	4.41545	0.384	0.021	0	67092	N0
Nudc	0	4.08227	0.387	0.024	0	18221	N0
Ect2	0	6.58715	0.365	0.004	0	13605	N0
Nono	0	2.39707	0.45	0.09	0	53610	N0
Ccnb1	0	7.07714	0.362	0.003	0	268697	N0
Arhgap11a	0	3.62066	0.393	0.036	0	228482	N0
Mcm6	0	5.55307	0.366	0.009	0	17219	N0
Clspn	0	7.42571	0.359	0.002	0	269582	N0
Esco2	0	8.75082	0.358	0.001	0	71988	N0
Kdelr2	0	2.73318	0.427	0.071	0	66913	N0
Depdc1a	0	7.16687	0.358	0.003	0	76131	N0
Ssb	0	2.00305	0.472	0.119	0	20823	N0
Eif1ax	0	2.48364	0.431	0.079	0	66235	N0
E2f2	0	2.03873	0.473	0.124	0	242705	N0
Tbrg1	0	2.25729	0.443	0.094	0	21376	N0
Nol7	0	2.74087	0.414	0.066	0	70078	N0
Ndc80	0	7.13793	0.348	0.003	0	67052	N0
Manf	0	2.5417	0.422	0.078	0	74840	N0
Rps2	0	2.36069	0.892	0.549	0	16898	N0
Cdca7	0	3.24023	0.384	0.043	0	66953	N0
Plk1	0	7.65636	0.343	0.002	0	18817	N0
Knstrn	0	5.75318	0.348	0.007	0	51944	N0
Shcbp1	0	6.58688	0.345	0.004	0	20419	N0
Plk4	0	3.24094	0.377	0.037	0	20873	N0
Anln	0	4.90274	0.354	0.014	0	68743	N0
Park7	0	2.03531	0.457	0.118	0	57320	N0
Prtn3	0	6.49395	0.376	0.037	0	19152	N0
Rpl28	0	2.14493	0.991	0.653	0	19943	N0
Rnaseh2b	0	5.23919	0.348	0.01	0	67153	N0
Sgo1	0	7.68	0.339	0.002	0	72415	N0
Baz1b	0	2.61206	0.407	0.07	0	22385	N0
Rdx	0	2.30888	0.421	0.086	0	19684	N0
H3c3	0	8.97924	0.334	0.001	0	319148	N0
Nxt1	0	3.40208	0.366	0.036	0	56488	N0
Hat1	0	2.73901	0.386	0.057	0	107435	N0
Rangap1	0	5.4255	0.338	0.009	0	19387	N0
Rps8	0	2.20694	0.986	0.657	0	20116	N0
Xpo1	0	2.21079	0.415	0.088	0	103573	N0
Cenpp	0	5.49751	0.334	0.008	0	66336	N0
Dlgap5	0	5.48157	0.333	0.008	0	218977	N0
Mbnl3	0	2.97088	0.375	0.05	0	171170	N0
Kif4	0	7.07662	0.328	0.003	0	16571	N0
Hspa14	0	2.227	0.412	0.087	0	50497	N0
Acadl	0	2.3967	0.403	0.079	0	11363	N0
Tiam1	0	2.05827	0.431	0.107	0	21844	N0
Aff2	0	2.00721	0.43	0.106	0	14266	N0
Eri1	0	4.01408	0.347	0.023	0	67276	N0
Dtl	0	6.6684	0.327	0.004	0	76843	N0
Erh	0	3.4033	0.36	0.038	0	13877	N0
Stil	0	5.55011	0.329	0.008	0	20460	N0
Srsf4	0	2.85607	0.372	0.053	0	57317	N0
Ica1	0	2.22996	0.397	0.079	0	15893	N0
Cetn3	0	2.30145	0.399	0.081	0	12626	N0
Lbp	0	2.08819	0.413	0.096	0	16803	N0
Eny2	0	3.60666	0.348	0.031	0	223527	N0
Rbl1	0	4.5347	0.331	0.015	0	19650	N0
Mrps16	0	2.10288	0.41	0.094	0	66242	N0
Mt1	0	2.69191	0.398	0.085	0	17748	N0
Uchl5	0	2.21997	0.392	0.08	0	56207	N0
Ndufa5	0	3.3606	0.349	0.037	0	68202	N0
Mad2l1	0	4.82095	0.324	0.012	0	56150	N0
Metap2	0	2.85663	0.374	0.063	0	56307	N0
Rfc1	0	2.46135	0.386	0.076	0	19687	N0
Cbx5	0	5.69384	0.317	0.007	0	12419	N0
Bub1b	0	5.91287	0.314	0.005	0	12236	N0
Pxylp1	0	2.91589	0.358	0.049	0	235534	N0
Tsn	0	2.41164	0.381	0.073	0	22099	N0
Uba2	0	2.85483	0.36	0.052	0	50995	N0
Sgo2a	0	7.43485	0.309	0.002	0	68549	N0
Gm2000	0	2.02771	0.445	0.139	0	NA	N0
Ilf2	0	3.71346	0.332	0.026	0	67781	N0
0610010K14Rik	0	3.0807	0.347	0.041	0	104457	N0
Ncaph2	0	3.25501	0.344	0.038	0	52683	N0
Rplp0	0	2.03125	0.94	0.635	0	11837	N0
Maz	0	3.44412	0.335	0.032	0	17188	N0
Utp3	0	2.73181	0.354	0.052	0	65961	N0
Ulbp1	0	6.21248	0.306	0.004	0	77777	N0
Sumo3	0	2.99721	0.347	0.045	0	20610	N0
H2ac4	0	8.41972	0.303	0.001	0	319172	N0
Swi5	0	2.03653	0.406	0.105	0	72931	N0
Rbbp7	0	3.48961	0.332	0.031	0	245688	N0
Cenpk	0	6.33635	0.305	0.004	0	60411	N0
Krtcap2	0	3.34789	0.337	0.037	0	66059	N0
Hnrnpr	0	3.13583	0.341	0.041	0	74326	N0
G3bp1	0	2.10987	0.383	0.083	0	27041	N0
Mcm4	0	4.33791	0.318	0.018	0	17217	N0
Kif22	0	7.28361	0.301	0.002	0	110033	N0
Dazap1	0	2.06949	0.392	0.096	0	70248	N0
Pola1	0	6.00762	0.302	0.006	0	18968	N0
Eif3c	0	2.03461	0.392	0.098	0	56347	N0
Bcas2	0	2.00905	0.392	0.099	0	68183	N0
Rnaset2b	0	2.12728	0.402	0.11	0	68195	N0
Cct7	0	2.3536	0.364	0.072	0	12468	N0
Rpl13	0	2.1435	0.985	0.694	0	270106	N0
Brca1	0	5.97864	0.296	0.005	0	12189	N0
Cenph	0	7.14305	0.293	0.002	0	26886	N0
Chchd1	0	2.6061	0.349	0.058	0	66121	N0
Exosc8	0	4.98728	0.3	0.01	0	69639	N0
Hvcn1	0	2.13674	0.372	0.082	0	74096	N0
Cdk2	0	2.55208	0.352	0.062	0	12566	N0
Atad5	0	5.03804	0.299	0.009	0	237877	N0
Timm23	0	2.19828	0.373	0.083	0	53600	N0
Tk1	0	6.9422	0.29	0.003	0	21877	N0
Csrp1	0	5.00227	0.295	0.009	0	13007	N0
Cip2a	0	4.93068	0.296	0.01	0	224171	N0
Odf2	0	2.62098	0.342	0.057	0	18286	N0
Mms22l	0	5.82444	0.291	0.006	0	212377	N0
Ndufb2	0	2.03704	0.381	0.097	0	68198	N0
Syncrip	0	2.0321	0.376	0.092	0	56403	N0
Srsf1	0	2.53943	0.344	0.06	0	110809	N0
Cdc45	0	4.85663	0.294	0.01	0	12544	N0
H3c6	0	6.27805	0.287	0.004	0	319151	N0
Mrps17	0	2.9668	0.323	0.041	0	66258	N0
Vdac1	0	2.31015	0.354	0.072	0	22333	N0
E2f7	0	7.71793	0.282	0.001	0	52679	N0
Gm2296	0	2.70246	0.336	0.056	0	NA	N0
Spag5	0	6.88386	0.283	0.003	0	54141	N0
Brip1os	0	3.48563	0.309	0.029	0	74038	N0
Ptgs1	0	2.65778	0.333	0.054	0	19224	N0
Sae1	0	4.10836	0.296	0.017	0	56459	N0
Stt3b	0	2.0119	0.363	0.088	0	68292	N0
Prom1	0	2.28614	0.342	0.068	0	19126	N0
Aurka	0	3.67404	0.298	0.024	0	20878	N0
Ncapg	0	7.30563	0.275	0.002	0	54392	N0
Bola2	0	2.78821	0.323	0.05	0	66162	N0
Rfc4	0	5.75866	0.279	0.006	0	106344	N0
Ube2e3	0	2.39653	0.33	0.058	0	22193	N0
Nfyb	0	2.35086	0.342	0.07	0	18045	N0
Depdc1b	0	3.04836	0.311	0.039	0	218581	N0
Eef1d	0	2.28892	0.348	0.076	0	66656	N0
Pdcd5	0	2.07532	0.353	0.082	0	56330	N0
Cpa6	0	2.08582	0.367	0.097	0	329093	N0
Commd3	0	2.87514	0.314	0.044	0	12238	N0
Ncaph	0	7.71705	0.271	0.001	0	215387	N0
S100a1	0	3.34976	0.303	0.034	0	20193	N0
Rnps1	0	2.89103	0.311	0.042	0	19826	N0
C2cd5	0	2.31753	0.336	0.068	0	74741	N0
Ckap2l	0	2.73549	0.31	0.043	0	70466	N0
H2bc15	0	8.05208	0.268	0.001	0	319187	N0
Hmgn5	0	3.93024	0.285	0.019	0	50887	N0
Brip1	0	6.36892	0.268	0.003	0	237911	N0
Supt16	0	2.46742	0.328	0.063	0	114741	N0
Anapc11	0	2.34392	0.328	0.064	0	66156	N0
Mthfd2	0	3.30947	0.294	0.031	0	17768	N0
Foxm1	0	7.06465	0.265	0.002	0	14235	N0
Ptbp1	0	3.01849	0.3	0.038	0	19205	N0
Nuf2	0	7.35663	0.263	0.002	0	66977	N0
Snrnp40	0	2.82032	0.303	0.042	0	66585	N0
Ppil1	0	4.82282	0.271	0.01	0	68816	N0
Kifc1	0	6.7258	0.264	0.003	0	100502766	N0
Pds5b	0	3.19331	0.292	0.032	0	100710	N0
Cdca2	0	8.24485	0.26	0.001	0	108912	N0
Rif1	0	4.46431	0.27	0.013	0	51869	N0
Slc43a3	0	5.01108	0.266	0.009	0	58207	N0
Psip1	0	2.5053	0.312	0.057	0	101739	N0
Emg1	0	2.45422	0.314	0.059	0	14791	N0
Cct2	0	2.11135	0.335	0.08	0	12461	N0
Igfbp4	0	4.38594	0.267	0.012	0	16010	N0
Psma5	0	2.04297	0.337	0.083	0	26442	N0
Ppm1g	0	2.12178	0.329	0.075	0	14208	N0
Mlec	0	2.03276	0.336	0.082	0	109154	N0
Desi1	0	2.89102	0.296	0.042	0	28075	N0
Naa50	0	2.27159	0.319	0.065	0	72117	N0
Ddx39a	0	3.37329	0.282	0.028	0	68278	N0
Ctdspl2	0	3.44025	0.279	0.026	0	329506	N0
Cep57	0	3.34743	0.281	0.028	0	74360	N0
Cenpc1	0	3.70331	0.272	0.02	0	12617	N0
Eif3i	0	2.86258	0.294	0.043	0	54709	N0
Srsf10	0	2.05329	0.325	0.075	0	14105	N0
Mcm2	0	5.91077	0.255	0.005	0	17216	N0
Ddost	0	3.06723	0.287	0.037	0	13200	N0
Sptbn1	0	2.03782	0.328	0.079	0	20742	N0
Mis18bp1	0	6.70303	0.252	0.003	0	217653	N0
Eif3e	0	2.05203	0.329	0.08	0	16341	N0
Hells	0	6.02968	0.253	0.004	0	15201	N0
Trim59	0	3.29602	0.27	0.022	0	66949	N0
Pole4	0	3.68004	0.269	0.022	0	66979	N0
Tcp1	0	3.42765	0.274	0.027	0	21454	N0
Tomm5	0	2.18439	0.316	0.069	0	68512	N0
Cntln	0	5.53747	0.253	0.006	0	338349	N0
Ccnf	0	4.72609	0.256	0.009	0	12449	N0
Vma21	0	2.8983	0.286	0.039	0	67048	N0
H2az1	0	3.02313	0.838	0.592	0	51788	N0
Luc7l3	0	2.22752	0.315	0.069	0	67684	N0
Kif20b	0	6.62951	0.249	0.003	0	240641	N0
Rev1	0	2.64668	0.291	0.046	0	56210	N0
Ubl4a	0	2.7257	0.288	0.043	0	27643	N0
Anapc15	0	3.47771	0.268	0.024	0	75430	N0
Aspm	0	6.92646	0.245	0.002	0	12316	N0
Ccne2	0	6.10716	0.247	0.004	0	12448	N0
Eif1ad	0	3.12442	0.272	0.031	0	69860	N0
Stub1	0	2.35713	0.298	0.057	0	56424	N0
Ptpn7	0	2.81699	0.279	0.04	0	320139	N0
Psmc4	0	2.30778	0.3	0.061	0	23996	N0
Nup62	0	4.31849	0.249	0.012	0	18226	N0
Rfc3	0	5.6562	0.241	0.005	0	69263	N0
Nkg7	0	4.82905	0.246	0.01	0	72310	N0
Pmf1	0	2.63887	0.277	0.042	0	67037	N0
Pcm1	0	2.37824	0.287	0.053	0	18536	N0
Rpa1	0	5.11958	0.241	0.007	0	68275	N0
Actl6a	0	3.61874	0.254	0.021	0	56456	N0
Ska2	0	6.87577	0.235	0.002	0	66140	N0
Cyc1	0	2.45958	0.286	0.053	0	66445	N0
Pdap1	0	2.1649	0.296	0.066	0	231887	N0
Efcab11	0	6.15268	0.232	0.003	0	78767	N0
Ppp3cb	0	2.1887	0.291	0.062	0	19056	N0
Ube2t	0	6.04816	0.231	0.003	0	67196	N0
Lin9	0	4.89959	0.236	0.008	0	72568	N0
Ebna1bp2	0	2.28475	0.288	0.06	0	69072	N0
Ndufs8	0	2.1946	0.291	0.063	0	225887	N0
Prim2	0	2.20565	0.276	0.049	0	19076	N0
Prim1	0	6.98243	0.229	0.002	0	19075	N0
Cbx1	0	3.0761	0.259	0.032	0	12412	N0
Snrpa1	0	4.00722	0.243	0.016	0	68981	N0
Pin1	0	2.14855	0.292	0.065	0	23988	N0
Rad51ap1	0	7.57506	0.227	0.001	0	19362	N0
Mdh1	0	2.74603	0.268	0.042	0	17449	N0
Trim27	0	2.96004	0.26	0.034	0	19720	N0
Lage3	0	3.55938	0.247	0.021	0	66192	N0
Mrpl15	0	2.97698	0.257	0.032	0	27395	N0
Elane	0	7.27642	0.249	0.024	0	50701	N0
Eif2s1	0	3.02904	0.257	0.032	0	13665	N0
Arsb	0	2.0798	0.29	0.065	0	11881	N0
Kpnb1	0	2.77752	0.264	0.04	0	16211	N0
H2ac22	0	7.49982	0.225	0.001	0	319170	N0
Cops3	0	2.34511	0.275	0.052	0	26572	N0
Casp8ap2	0	2.84582	0.258	0.035	0	26885	N0
Cdca4	0	3.58883	0.243	0.02	0	71963	N0
Mrpl28	0	3.45598	0.246	0.023	0	68611	N0
Kntc1	0	5.21282	0.227	0.005	0	208628	N0
Ctdspl	0	3.40734	0.246	0.024	0	69274	N0
Pnn	0	2.73322	0.262	0.04	0	18949	N0
Srrt	0	2.57479	0.266	0.045	0	83701	N0
Rad51	0	7.10677	0.223	0.002	0	19361	N0
Sfmbt1	0	3.0704	0.252	0.031	0	54650	N0
Srsf9	0	2.02773	0.292	0.071	0	108014	N0
Cdc7	0	6.11915	0.223	0.003	0	12545	N0
Dock1	0	4.71343	0.229	0.009	0	330662	N0
Wdhd1	0	5.11688	0.227	0.007	0	218973	N0
Fen1	0	3.66115	0.241	0.021	0	14156	N0
Brd9	0	2.13365	0.283	0.063	0	105246	N0
Bub1	0	6.80485	0.221	0.002	0	12235	N0
Bora	0	6.03424	0.222	0.003	0	77744	N0
Cep55	0	6.92916	0.221	0.002	0	74107	N0
Rbmxl1	0	2.82136	0.253	0.035	0	19656	N0
Uchl3	0	2.94313	0.249	0.031	0	50933	N0
Ckap2	0	6.76283	0.219	0.002	0	80986	N0
Oxct1	0	2.82139	0.251	0.034	0	67041	N0
Mrpl13	0	3.59692	0.237	0.02	0	68537	N0
Nudt3	0	2.69593	0.256	0.039	0	56409	N0
Antkmt	0	2.06396	0.286	0.069	0	214917	N0
Arl6ip6	0	2.09798	0.279	0.064	0	65103	N0
Pa2g4	0	4.27064	0.228	0.013	0	18813	N0
Tcerg1	0	3.54447	0.234	0.02	0	56070	N0
Ndufa12	0	2.63268	0.255	0.042	0	66414	N0
Ffar2	0	2.34674	0.263	0.051	0	233079	N0
Dnajc19	0	2.64493	0.253	0.041	0	67713	N0
Cacybp	0	2.41017	0.26	0.049	0	12301	N0
Myb	0	2.54377	0.261	0.05	0	17863	N0
Zgrf1	0	5.41931	0.216	0.005	0	71643	N0
Ccne1	0	7.22934	0.213	0.002	0	12447	N0
Cox20	0	2.26663	0.265	0.055	0	66359	N0
Cct5	0	2.14974	0.272	0.062	0	12465	N0
Rpn2	0	2.76326	0.246	0.036	0	20014	N0
Mrpl58	0	3.10663	0.238	0.028	0	68572	N0
Upf3b	0	2.98709	0.239	0.029	0	68134	N0
Nme1	0	2.75045	0.257	0.048	0	18102	N0
Wdr76	0	6.06872	0.212	0.003	0	241627	N0
Msantd3	0	3.15045	0.235	0.026	0	66665	N0
Mrps12	0	2.59951	0.249	0.04	0	24030	N0
Cgas	0	5.16399	0.215	0.006	0	214763	N0
Smarcc1	0	4.17878	0.222	0.013	0	20588	N0
Bard1	0	6.37168	0.211	0.003	0	12021	N0
Magohb	0	2.94049	0.239	0.031	0	66441	N0
Kif20a	0	6.30602	0.211	0.003	0	19348	N0
Ada	0	2.67116	0.246	0.039	0	11486	N0
Dnajc2	0	2.59892	0.247	0.04	0	22791	N0
Ticrr	0	7.98725	0.208	0.001	0	77011	N0
Rex1bd	0	2.27576	0.258	0.052	0	66462	N0
Prkar2a	0	2.31197	0.257	0.051	0	19087	N0
Nme2	0	2.65868	0.265	0.059	0	18103	N0
A430005L14Rik	0	4.30205	0.217	0.011	0	97159	N0
Blm	0	2.69092	0.242	0.036	0	12144	N0
Bcl7c	0	2.70417	0.244	0.038	0	12055	N0
Cdt1	0	3.86244	0.221	0.016	0	67177	N0
Smarca4	0	2.99153	0.259	0.054	0	20586	N0
Pfdn4	0	2.58176	0.246	0.041	0	109054	N0
Rdm1	0	3.69483	0.221	0.017	0	66599	N0
Fundc2	0	3.70246	0.223	0.019	0	67391	N0
Pih1d1	0	2.31465	0.254	0.051	0	68845	N0
Mrpl42	0	3.8924	0.218	0.015	0	67270	N0
Khsrp	0	2.49513	0.248	0.045	0	16549	N0
Pcnt	0	3.07996	0.228	0.026	0	18541	N0
H3c11	0	7.52746	0.203	0.001	0	319153	N0
Kif18a	0	4.83091	0.209	0.007	0	228421	N0
Snrpb2	0	2.05495	0.262	0.061	0	20639	N0
Larp1b	0	2.08229	0.257	0.056	0	214048	N0
Rcc2	0	3.36353	0.222	0.021	0	108911	N0
Immt	0	2.78787	0.233	0.033	0	76614	N0
Fkbp3	0	3.69567	0.217	0.017	0	30795	N0
Galnt1	0	2.04031	0.26	0.06	0	14423	N0
Terf1	0	2.87743	0.23	0.032	0	21749	N0
Sass6	0	3.00321	0.225	0.027	0	72776	N0
Asf1a	0	3.79288	0.214	0.016	0	66403	N0
Cenpu	0	4.39027	0.207	0.009	0	71876	N0
Jade1	0	3.20199	0.219	0.022	0	269424	N0
Polr2m	0	2.96713	0.226	0.029	0	28015	N0
Paics	0	5.46541	0.201	0.005	0	67054	N0
Sfxn1	0	3.51178	0.215	0.019	0	14057	N0
H2ac20	0	6.74923	0.197	0.002	0	319176	N0
Kif2c	0	6.8277	0.197	0.002	0	73804	N0
Zcchc17	0	2.53073	0.234	0.039	0	619605	N0
Wwox	0	2.18167	0.242	0.048	0	80707	N0
Etfa	0	2.5326	0.234	0.04	0	110842	N0
Uqcrc1	0	2.02266	0.255	0.061	0	22273	N0
Cenpl	0	2.78835	0.224	0.031	0	70454	N0
H4c8	0	3.46144	0.209	0.016	0	69386	N0
Chaf1a	0	6.19529	0.196	0.003	0	27221	N0
E2f1	0	4.39338	0.204	0.011	0	13555	N0
Usp37	0	2.59987	0.229	0.037	0	319651	N0
Paxip1	0	4.4354	0.2	0.009	0	55982	N0
Pold3	0	3.24187	0.213	0.022	0	67967	N0
Cops6	0	2.62509	0.226	0.036	0	26893	N0
H2bc11	0	6.22661	0.193	0.003	0	319183	N0
Tfrc	0	3.13065	0.22	0.03	0	22042	N0
Ube2s	0	3.78208	0.233	0.044	0	77891	N0
Pigyl	0	2.30668	0.236	0.047	0	66268	N0
Rpa2	0	4.18309	0.199	0.011	0	19891	N0
Cdca5	0	7.65388	0.189	0.001	0	67849	N0
Smc5	0	3.3713	0.207	0.019	0	226026	N0
Mat2a	0	2.19462	0.238	0.051	0	232087	N0
Rfc5	0	4.65063	0.194	0.008	0	72151	N0
Cdk2ap1	0	2.18449	0.236	0.05	0	13445	N0
Cdc6	0	5.46124	0.19	0.004	0	23834	N0
Ptpa	0	2.38017	0.23	0.045	0	110854	N0
Cenps	0	6.82133	0.187	0.002	0	69928	N0
G2e3	0	4.02028	0.198	0.013	0	217558	N0
Haus4	0	4.93931	0.191	0.006	0	219072	N0
Rnf168	0	4.50824	0.193	0.008	0	70238	N0
Tcf12	0	2.47225	0.221	0.037	0	21406	N0
Smarcc2	0	2.23306	0.232	0.048	0	68094	N0
Prr11	0	6.96514	0.186	0.002	0	270906	N0
Naa40	0	4.15298	0.194	0.01	0	70999	N0
Ptgr1	0	3.35196	0.203	0.021	0	67103	N0
Naa20	0	2.46638	0.219	0.037	0	67877	N0
Junos	0	2.01974	0.239	0.057	0	230451	N0
Arl6ip4	0	2.50924	0.22	0.038	0	65105	N0
Atl3	0	2.51167	0.217	0.035	0	109168	N0
Xist	0	2.71445	0.294	0.112	0	213742	N0
Fignl1	0	5.19053	0.186	0.005	0	60530	N0
Gspt1	0	2.65236	0.214	0.033	0	14852	N0
Nrm	0	3.10492	0.204	0.023	0	106582	N0
D030056L22Rik	0	4.02318	0.192	0.011	0	225995	N0
Aimp1	0	2.11526	0.233	0.053	0	13722	N0
Fdps	0	2.19701	0.235	0.055	0	110196	N0
Ap1s1	0	2.90534	0.207	0.027	0	11769	N0
Nop10	0	2.18363	0.235	0.056	0	66181	N0
Cep152	0	3.76429	0.192	0.013	0	99100	N0
Pkmyt1	0	6.49025	0.181	0.002	0	268930	N0
Acp1	0	2.18756	0.231	0.053	0	11431	N0
Pop7	0	2.44799	0.217	0.039	0	74097	N0
Ilf3	0	2.64913	0.209	0.031	0	16201	N0
Tnfsf13	0	4.96012	0.184	0.006	0	69583	N0
Prdx1	0	2.51553	0.245	0.068	0	18477	N0
Dnah8	0	4.01295	0.191	0.014	0	13417	N0
Samd1	0	5.11783	0.181	0.005	0	666704	N0
Prss57	0	3.58474	0.194	0.019	0	73106	N0
Kpna3	0	2.02264	0.227	0.052	0	16648	N0
Cep295	0	3.87292	0.187	0.012	0	319675	N0
Naa38	0	2.30095	0.219	0.044	0	78304	N0
Pbdc1	0	2.38304	0.214	0.039	0	67683	N0
Casp8	0	2.0384	0.228	0.054	0	12370	N0
Iqgap3	0	6.72909	0.176	0.002	0	404710	N0
Kif18b	0	8.25303	0.175	0.001	0	70218	N0
Psmc5	0	2.26235	0.22	0.046	0	19184	N0
Galnt2	0	3.15322	0.195	0.022	0	108148	N0
Mast2	0	4.12833	0.184	0.011	0	17776	N0
Fmc1	0	2.19333	0.22	0.047	0	66117	N0
Zwilch	0	5.43662	0.177	0.004	0	68014	N0
Sf3a3	0	3.07943	0.194	0.022	0	75062	N0
Rsrc1	0	2.16685	0.218	0.046	0	66880	N0
Cdk5rap2	0	4.11309	0.182	0.01	0	214444	N0
Sf3b3	0	2.51924	0.206	0.034	0	101943	N0
Ndufaf3	0	2.48553	0.208	0.036	0	66706	N0
Dynll2	0	3.60862	0.187	0.015	0	68097	N0
H2bc3	0	6.98173	0.173	0.001	0	319178	N0
Mxd3	0	7.91978	0.173	0.001	0	17121	N0
Bckdk	0	3.34973	0.19	0.019	0	12041	N0
Tssc4	0	3.28446	0.191	0.02	0	56844	N0
Dhx9	0	2.1071	0.22	0.049	0	13211	N0
Hirip3	0	5.88973	0.174	0.003	0	233876	N0
Rad51b	0	3.94789	0.185	0.014	0	19363	N0
Ndc1	0	5.07485	0.175	0.005	0	72787	N0
Isca2	0	2.24512	0.215	0.045	0	74316	N0
Gmds	0	2.13488	0.211	0.042	0	218138	N0
Dhfr	0	5.77078	0.171	0.003	0	13361	N0
Prmt1	0	3.29859	0.186	0.019	0	15469	N0
Nhp2	0	2.53343	0.2	0.034	0	52530	N0
Sdf2l1	0	4.33708	0.176	0.01	0	64136	N0
Supt3	0	2.1369	0.208	0.042	0	109115	N0
Larp7	0	2.46121	0.201	0.036	0	28036	N0
Pole	0	6.68224	0.167	0.002	0	18973	N0
Trip13	0	6.54185	0.167	0.002	0	69716	N0
Cdca7l	0	4.43035	0.173	0.008	0	217946	N0
Fam3c	0	3.08975	0.184	0.02	0	27999	N0
Memo1	0	2.42141	0.2	0.036	0	76890	N0
Golt1b	0	3.38405	0.181	0.017	0	66964	N0
Casp7	0	2.19224	0.21	0.046	0	12369	N0
Ppwd1	0	2.26102	0.203	0.04	0	238831	N0
Stip1	0	2.29799	0.204	0.041	0	20867	N0
Zfp280d	0	2.26799	0.203	0.041	0	235469	N0
Nudt5	0	4.30138	0.169	0.008	0	53893	N0
H3c7	0	6.81438	0.162	0.001	0	260423	N0
Dnajc21	0	2.24996	0.203	0.042	0	78244	N0
Gas2l3	0	3.97344	0.172	0.011	0	237436	N0
Nup205	0	4.51259	0.167	0.007	0	70699	N0
Tm7sf3	0	3.17001	0.18	0.02	0	67623	N0
Rnf26	0	4.83893	0.166	0.006	0	213211	N0
Hcfc1	0	2.70344	0.19	0.03	0	15161	N0
Ppih	0	3.39657	0.177	0.017	0	66101	N0
Cnih1	0	3.6487	0.174	0.014	0	12793	N0
Anapc1	0	2.51843	0.191	0.032	0	17222	N0
Mrps26	0	3.1319	0.179	0.02	0	99045	N0
Mis18a	0	3.26206	0.177	0.018	0	66578	N0
D17H6S56E-5	0	4.24208	0.17	0.011	0	110956	N0
Meaf6	0	3.5167	0.173	0.014	0	70088	N0
Cct6a	0	2.15986	0.203	0.045	0	12466	N0
Nup160	0	3.17704	0.176	0.018	0	59015	N0
Lin52	0	2.1825	0.198	0.04	0	217708	N0
Mrps36	0	3.40223	0.176	0.018	0	66128	N0
Ttk	0	8.27443	0.157	0	0	22137	N0
Rad18	0	2.80185	0.178	0.022	0	58186	N0
Esyt1	0	2.25983	0.197	0.041	0	23943	N0
Mapk4	0	2.70179	0.184	0.028	0	225724	N0
Ssbp4	0	2.05048	0.202	0.047	0	76900	N0
Snrnp48	0	2.07604	0.198	0.043	0	67797	N0
Rcc1	0	5.45373	0.159	0.004	0	100088	N0
Csrp2	0	4.38195	0.163	0.008	0	13008	N0
E2f3	0	2.00251	0.205	0.05	0	13557	N0
Stom	0	2.42716	0.189	0.035	0	13830	N0
Mcph1	0	3.80049	0.165	0.011	0	244329	N0
Ak6	0	3.07213	0.174	0.02	0	102216272	N0
Pfdn1	0	2.39228	0.191	0.037	0	67199	N0
Wee1	0	6.02963	0.155	0.002	0	22390	N0
Psmd7	0	2.25013	0.193	0.04	0	17463	N0
Dna2	0	2.36256	0.185	0.032	0	327762	N0
Lrr1	0	7.99933	0.154	0.001	0	69706	N0
Nelfe	0	2.5719	0.183	0.03	0	27632	N0
Snhg1	0	2.50049	0.187	0.034	0	83673	N0
Cse1l	0	3.20847	0.17	0.018	0	110750	N0
Rbm15	0	2.81993	0.176	0.024	0	229700	N0
Ldhb	0	3.93117	0.163	0.011	0	16832	N0
Nsmce3	0	2.37923	0.188	0.036	0	66647	N0
Lyl1	0	2.47772	0.183	0.031	0	17095	N0
Npat	0	2.52676	0.182	0.03	0	244879	N0
Rhno1	0	3.83755	0.162	0.011	0	72440	N0
Mogat2	0	3.56186	0.165	0.014	0	233549	N0
Aarsd1	0	4.52743	0.158	0.007	0	69684	N0
Kpna2	0	4.41213	0.159	0.008	0	16647	N0
Glrx5	0	2.71572	0.194	0.044	0	73046	N0
Haus3	0	2.70067	0.176	0.026	0	231123	N0
Fzr1	0	2.63297	0.18	0.03	0	56371	N0
Nt5c	0	2.57818	0.18	0.03	0	50773	N0
H1f0	0	2.70083	0.179	0.029	0	14958	N0
Srbd1	0	3.46009	0.164	0.014	0	78586	N0
Mrpl21	0	2.79584	0.175	0.025	0	353242	N0
Tlnrd1	0	3.3868	0.165	0.016	0	80889	N0
Ints7	0	3.57053	0.163	0.014	0	77065	N0
Cdk4	0	3.67765	0.163	0.014	0	12567	N0
Sgpp1	0	2.4159	0.183	0.034	0	81535	N0
Usp14	0	2.7403	0.174	0.025	0	59025	N0
Trim28	0	3.2643	0.164	0.017	0	21849	N0
Hdac2	0	3.28975	0.163	0.016	0	15182	N0
Stoml2	0	2.64382	0.174	0.027	0	66592	N0
Melk	0	7.44505	0.148	0.001	0	17279	N0
Mad1l1	0	2.81603	0.172	0.025	0	17120	N0
Slirp	0	2.37667	0.181	0.034	0	380773	N0
Ift27	0	4.65895	0.153	0.006	0	67042	N0
Eif3l	0	2.19468	0.188	0.041	0	223691	N0
Samm50	0	2.48877	0.178	0.031	0	68653	N0
Mtx2	0	3.06503	0.165	0.019	0	53375	N0
Katnbl1	0	2.77057	0.169	0.023	0	72425	N0
Ccdc88a	0	3.25106	0.162	0.016	0	108686	N0
Topors	0	2.13871	0.185	0.039	0	106021	N0
Tcf3	0	2.80686	0.177	0.031	0	21423	N0
Dgcr8	0	4.99234	0.151	0.005	0	94223	N0
Ppp1r7	0	2.72879	0.169	0.024	0	66385	N0
Nup210	0	3.23537	0.166	0.021	0	54563	N0
Kif14	0	7.97022	0.146	0.001	0	381293	N0
C1qtnf12	0	2.49172	0.183	0.038	0	67389	N0
Ska3	0	4.68114	0.15	0.005	0	219114	N0
Jpt2	0	4.59797	0.151	0.006	0	52009	N0
Nop58	0	3.16873	0.162	0.018	0	55989	N0
Eif3b	0	2.99704	0.165	0.021	0	27979	N0
Nup88	0	2.62024	0.17	0.026	0	19069	N0
Mrpl40	0	2.85583	0.166	0.022	0	18100	N0
Ola1	0	2.32962	0.179	0.035	0	67059	N0
Reep4	0	3.87759	0.155	0.011	0	72549	N0
Nde1	0	3.41115	0.159	0.016	0	67203	N0
Gfi1	0	2.6756	0.168	0.026	0	14581	N0
Ddb1	0	2.0077	0.188	0.046	0	13194	N0
Sephs1	0	4.55122	0.148	0.006	0	109079	N0
Mybl2	0	5.39087	0.145	0.003	0	17865	N0
Mns1	0	6.00421	0.145	0.003	0	17427	N0
Timm17a	0	2.48047	0.171	0.03	0	21854	N0
Babam1	0	2.53439	0.17	0.029	0	68251	N0
Imp3	0	2.64962	0.166	0.025	0	102462	N0
Cox6b2	0	4.27243	0.15	0.009	0	333182	N0
Pals2	0	2.52975	0.165	0.025	0	56524	N0
Gins4	0	2.81738	0.162	0.022	0	109145	N0
Cpsf2	0	2.0654	0.184	0.044	0	51786	N0
Tdp2	0	3.2525	0.155	0.015	0	56196	N0
2810408I11Rik	0	4.55384	0.146	0.006	0	69941	N0
Mastl	0	2.99169	0.158	0.019	0	67121	N0
Cfap20	0	2.7858	0.161	0.022	0	14894	N0
Nup107	0	2.61542	0.162	0.023	0	103468	N0
Gmps	0	2.22971	0.174	0.035	0	229363	N0
Vars	0	4.02366	0.148	0.009	0	NA	N0
Cep192	0	2.35167	0.168	0.03	0	70799	N0
Nudcd2	0	3.86836	0.148	0.01	0	52653	N0
Erg28	0	3.4421	0.152	0.014	0	58520	N0
Pimreg	0	7.44656	0.138	0.001	0	109212	N0
Gstm1	0	3.63481	0.151	0.014	0	14862	N0
Pole3	0	3.92942	0.147	0.01	0	59001	N0
Timm50	0	4.52487	0.143	0.006	0	66525	N0
Zw10	0	3.56992	0.149	0.012	0	26951	N0
Larp1	0	2.20109	0.173	0.036	0	73158	N0
Kmt5c	0	2.63479	0.161	0.025	0	232811	N0
H2bc8	0	5.29672	0.14	0.004	0	319181	N0
H3c2	0	8.89415	0.136	0	0	319150	N0
Polq	0	5.7458	0.139	0.003	0	77782	N0
Ndufs3	0	2.14684	0.174	0.038	0	68349	N0
Mrpl35	0	3.47581	0.149	0.013	0	66223	N0
Mgat2	0	2.10429	0.174	0.038	0	217664	N0
Mtrex	0	2.08645	0.175	0.039	0	72198	N0
Nubp1	0	3.9021	0.146	0.01	0	26425	N0
Rpp30	0	4.02731	0.145	0.009	0	54364	N0
Ubap2	0	2.3037	0.166	0.031	0	68926	N0
Chchd3	0	2.29742	0.168	0.033	0	66075	N0
Sf3a1	0	2.55235	0.162	0.027	0	67465	N0
Mrps9	0	2.19257	0.172	0.037	0	69527	N0
Ythdf2	0	2.03209	0.175	0.04	0	213541	N0
Rad50	0	4.18019	0.143	0.008	0	19360	N0
Gen1	0	6.63742	0.135	0.001	0	209334	N0
Cenpm	0	6.96654	0.135	0.001	0	66570	N0
Rsl1d1	0	2.34932	0.165	0.031	0	66409	N0
Mrpl12	0	3.96632	0.144	0.01	0	56282	N0
Slf1	0	3.2762	0.147	0.013	0	105377	N0
Ccdc25	0	2.00982	0.175	0.041	0	67179	N0
Pkig	0	3.17603	0.159	0.026	0	18769	N0
Fbxl2	0	2.26338	0.167	0.034	0	72179	N0
Mbd3	0	3.129	0.151	0.018	0	17192	N0
Naa16	0	2.44367	0.161	0.028	0	66897	N0
Rad23a	0	2.53135	0.16	0.028	0	19358	N0
Ubr7	0	2.94501	0.151	0.019	0	66622	N0
Espl1	0	7.06166	0.133	0.001	0	105988	N0
Tcf19	0	6.24076	0.134	0.002	0	106795	N0
H2afv	0	4.73344	0.152	0.02	0	NA	N0
Hmbs	0	4.24711	0.145	0.013	0	15288	N0
Emc8	0	2.7504	0.152	0.021	0	18117	N0
Mrpl55	0	2.84991	0.152	0.021	0	67212	N0
Gm47283	0	2.34014	0.166	0.035	0	NA	N0
Fkbp4	0	3.57679	0.143	0.012	0	14228	N0
Cenpn	0	6.07065	0.132	0.002	0	72155	N0
Mis12	0	4.53871	0.136	0.006	0	67139	N0
Hmgxb4	0	3.44307	0.142	0.012	0	70823	N0
Fancd2	0	6.60397	0.13	0.001	0	211651	N0
Mrpl23	0	2.55053	0.156	0.027	0	19935	N0
Lpcat1	0	2.03146	0.169	0.04	0	210992	N0
Syngr1	0	3.98033	0.138	0.009	0	20972	N0
Rmi2	0	5.93167	0.131	0.002	0	223970	N0
Srpk1	0	2.08841	0.167	0.038	0	20815	N0
Ndufv1	0	2.27991	0.161	0.032	0	17995	N0
Smarcb1	0	2.56264	0.154	0.026	0	20587	N0
Eftud2	0	2.85586	0.148	0.02	0	20624	N0
Net1	0	4.38544	0.133	0.005	0	56349	N0
Brcc3	0	2.73522	0.149	0.021	0	210766	N0
Sms	0	3.75829	0.138	0.01	0	20603	N0
Snhg6	0	2.55178	0.152	0.025	0	73824	N0
Nek2	0	7.51492	0.128	0.001	0	18005	N0
Slco4a1	0	2.08169	0.163	0.036	0	108115	N0
Ybx3	0	3.39043	0.144	0.017	0	56449	N0
Pold1	0	4.4909	0.133	0.006	0	18971	N0
Pym1	0	2.23267	0.16	0.033	0	78428	N0
Hspd1	0	2.58942	0.156	0.03	0	15510	N0
Vcam1	0	3.67426	0.134	0.008	0	22329	N0
Troap	0	6.92273	0.127	0.001	0	78733	N0
Rbmx2	0	2.86538	0.145	0.019	0	209003	N0
Calu	0	2.3171	0.156	0.031	0	12321	N0
Ctsg	0	5.10219	0.137	0.012	0	13035	N0
Trerf1	0	3.70369	0.135	0.01	0	224829	N0
Inip	0	2.87495	0.143	0.018	0	66209	N0
Ssbp3	0	2.66799	0.146	0.022	0	72475	N0
Phactr4	0	2.16974	0.157	0.033	0	100169	N0
Syce2	0	5.77403	0.126	0.002	0	71846	N0
Tubg1	0	5.51378	0.127	0.003	0	103733	N0
H2afx	0	7.09664	0.128	0.004	0	NA	N0
Gstcd	0	3.17127	0.138	0.015	0	67553	N0
Cstf2	0	3.44086	0.135	0.012	0	108062	N0
Hikeshi	0	2.10282	0.157	0.034	0	67669	N0
Mtbp	0	4.37567	0.129	0.006	0	105837	N0
Thoc6	0	3.03155	0.139	0.017	0	386612	N0
Exosc7	0	2.60247	0.145	0.023	0	66446	N0
Tm9sf1	0	2.42739	0.148	0.026	0	74140	N0
Suv39h1	0	4.67545	0.127	0.005	0	20937	N0
Cenpi	0	6.93194	0.123	0.001	0	102920	N0
Pcyox1	0	3.21362	0.136	0.015	0	66881	N0
Mpo	0	5.24835	0.139	0.018	0	17523	N0
Ppid	0	2.28315	0.151	0.03	0	67738	N0
Aunip	0	7.20488	0.122	0.001	0	69885	N0
Tubgcp3	0	2.29724	0.151	0.03	0	259279	N0
Psmd3	0	2.07791	0.157	0.036	0	22123	N0
Hira	0	2.08836	0.156	0.035	0	15260	N0
Myg1	0	3.3997	0.131	0.011	0	60315	N0
Tex30	0	2.52566	0.145	0.025	0	75623	N0
Lmnb2	0	4.5236	0.126	0.006	0	16907	N0
Rbm10	0	2.4369	0.146	0.026	0	236732	N0
Timm8a1	0	3.6847	0.129	0.01	0	30058	N0
Immp1l	0	2.21348	0.151	0.032	0	66541	N0
Ccnh	0	2.18051	0.149	0.03	0	66671	N0
AW554918	0	2.23759	0.148	0.029	0	225289	N0
Iftap	0	4.46867	0.124	0.006	0	68170	N0
Apip	0	2.51733	0.141	0.023	0	56369	N0
Kif24	0	4.05174	0.126	0.008	0	109242	N0
Ndufa9	0	2.35953	0.147	0.029	0	66108	N0
Parpbp	0	7.15249	0.119	0.001	0	75317	N0
Med9	0	4.56042	0.123	0.005	0	192191	N0
Mcm10	0	3.16247	0.13	0.013	0	70024	N0
Glrx3	0	2.82241	0.137	0.02	0	30926	N0
Snrnp25	0	3.27196	0.13	0.013	0	78372	N0
Mrps34	0	2.78596	0.136	0.019	0	79044	N0
Dcps	0	2.314	0.144	0.027	0	69305	N0
Msl3	0	2.35215	0.144	0.027	0	17692	N0
Cnot9	0	3.3308	0.128	0.012	0	58184	N0
Gipc1	0	2.74978	0.136	0.02	0	67903	N0
Dbr1	0	3.2742	0.128	0.012	0	83703	N0
Pmm1	0	3.74462	0.125	0.009	0	29858	N0
Htatsf1	0	2.999	0.132	0.016	0	72459	N0
Pdik1l	0	4.38329	0.122	0.006	0	230809	N0
Brca2	0	5.18452	0.119	0.003	0	12190	N0
Mrpl44	0	2.43659	0.14	0.025	0	69163	N0
Mphosph6	0	2.53204	0.138	0.023	0	68533	N0
Serpine2	0	2.57112	0.134	0.019	0	20720	N0
4930579G24Rik	0	5.61307	0.117	0.002	0	75939	N0
Neto2	0	3.66727	0.123	0.008	0	74513	N0
Hdgfl2	0	2.34601	0.141	0.026	0	15193	N0
Gle1	0	2.33447	0.14	0.026	0	74412	N0
Ddrgk1	0	2.51138	0.135	0.021	0	77006	N0
Coq7	0	3.52184	0.126	0.012	0	12850	N0
Sclt1	0	2.13592	0.142	0.028	0	67161	N0
Poc1a	0	4.57629	0.118	0.004	0	70235	N0
Znhit3	0	3.89019	0.122	0.008	0	448850	N0
Taf6	0	3.41196	0.124	0.011	0	21343	N0
Htra2	0	2.76105	0.131	0.018	0	64704	N0
Ipo5	0	2.83662	0.131	0.018	0	70572	N0
Nup155	0	2.12734	0.143	0.03	0	170762	N0
Snrpa	0	2.51076	0.136	0.024	0	53607	N0
Clns1a	0	2.63812	0.131	0.02	0	12729	N0
Lsm7	0	3.25982	0.125	0.014	0	66094	N0
Etaa1	0	4.43008	0.116	0.005	0	68145	N0
Nans	0	3.10268	0.124	0.014	0	94181	N0
Smarcad1	0	2.5668	0.131	0.021	0	13990	N0
Gins2	0	5.06303	0.113	0.003	0	272551	N0
H2ac11	0	6.49643	0.111	0.001	0	319167	N0
Xrcc6	0	3.79079	0.12	0.01	0	14375	N0
Umps	0	2.60183	0.13	0.02	0	22247	N0
2700099C18Rik	0	5.11113	0.113	0.003	0	77022	N0
Npm3	0	2.6308	0.131	0.021	0	18150	N0
Ercc6l	0	5.22921	0.113	0.003	0	236930	N0
Hist1h1b	0	8.74662	0.111	0.001	0	NA	N0
Mthfd1l	0	3.78356	0.118	0.008	0	270685	N0
Armc1	0	2.50093	0.131	0.022	0	74252	N0
Mcm9	0	2.35821	0.133	0.024	0	71567	N0
Plcb1	0	3.42355	0.12	0.011	0	18795	N0
Lyar	0	2.61191	0.13	0.021	0	17089	N0
Psmc3ip	0	6.09367	0.111	0.002	0	19183	N0
Pdss2	0	2.21778	0.134	0.026	0	71365	N0
Haus6	0	4.04281	0.115	0.007	0	230376	N0
Agfg2	0	2.72331	0.128	0.02	0	231801	N0
Trim37	0	4.02667	0.115	0.007	0	68729	N0
Smim6	0	3.10038	0.122	0.014	0	68528	N0
H2ac6	0	3.06259	0.122	0.014	0	319164	N0
Thoc3	0	2.77332	0.126	0.018	0	73666	N0
Polh	0	4.59396	0.113	0.005	0	80905	N0
Rtkn2	0	3.73361	0.116	0.009	0	170799	N0
Timm22	0	2.43854	0.131	0.024	0	56322	N0
Seh1l	0	2.389	0.13	0.023	0	72124	N0
Bola3	0	3.3477	0.121	0.014	0	78653	N0
Prps1	0	3.97233	0.114	0.007	0	19139	N0
Fbxo7	0	2.3632	0.13	0.024	0	69754	N0
Txlna	0	2.58881	0.125	0.019	0	109658	N0
Alms1	0	4.61063	0.11	0.004	0	236266	N0
Nedd1	0	4.55912	0.111	0.005	0	17997	N0
Lman1	0	3.25598	0.119	0.013	0	70361	N0
Echs1	0	2.46252	0.127	0.022	0	93747	N0
Gm42047	0	4.43139	0.111	0.006	0	105246823	N0
Tdp1	0	4.90314	0.108	0.003	0	104884	N0
Mphosph8	0	2.71766	0.122	0.017	0	75339	N0
Lmf2	0	3.84657	0.112	0.007	0	105847	N0
Naa10	0	2.58336	0.124	0.019	0	56292	N0
Tfdp2	0	4.12017	0.112	0.008	0	211586	N0
Trim35	0	2.33835	0.128	0.024	0	66854	N0
Fcor	0	3.02622	0.118	0.014	0	100503924	N0
Mrpl49	0	3.52268	0.113	0.01	0	18120	N0
H4c3	0	4.11855	0.11	0.007	0	319155	N0
Nop56	0	2.92637	0.117	0.015	0	67134	N0
Tubgcp2	0	3.07839	0.115	0.013	0	74237	N0
Pycr2	0	2.84129	0.118	0.016	0	69051	N0
H2bc18	0	6.28101	0.103	0.001	0	319189	N0
Mrpl22	0	2.43462	0.123	0.021	0	216767	N0
Chaf1b	0	2.80706	0.118	0.016	0	110749	N0
Fxn	0	4.51291	0.107	0.005	0	14297	N0
Tshz1	0	3.19484	0.112	0.011	0	110796	N0
Arhgef39	0	5.80739	0.103	0.002	0	230098	N0
Chek2	0	5.75149	0.103	0.002	0	50883	N0
Cenpt	0	4.35238	0.106	0.005	0	320394	N0
Spdl1	0	5.47152	0.103	0.002	0	70385	N0
Hist1h2ap	0	7.13418	0.103	0.002	0	NA	N0
Polr3k	0	2.39514	0.122	0.022	0	67005	N0
Rad54l	0	6.75598	0.101	0.001	0	19366	N0
Akr1b3	0	3.14828	0.113	0.013	0	NA	N0
Mrps7	0	2.94186	0.114	0.014	0	50529	N0
Cenpj	0	2.73859	0.117	0.017	0	219103	N0
Ncbp2	0	2.3826	0.122	0.022	0	68092	N0
Trnau1ap	0	2.65138	0.118	0.018	0	71787	N0
Ccdc18	0	5.05659	0.103	0.003	0	73254	N0
C2cd3	0	2.48458	0.121	0.021	0	277939	N0
Nup133	0	3.88973	0.107	0.007	0	234865	N0
Haspin	0	5.4249	0.102	0.002	0	14841	N0
Nup85	0	5.11855	0.103	0.003	0	445007	N0
H3c4	0	5.61872	0.102	0.002	0	319149	N0
Mrps25	0	3.07258	0.112	0.013	0	64658	N0
Ruvbl2	0	2.6283	0.117	0.018	0	20174	N0
Abce1	0	2.78405	0.115	0.016	0	24015	N0
Acat1	0	2.4311	0.121	0.022	0	110446	N0
Impdh2	0	2.48937	0.121	0.022	0	23918	N0
Ncoa7	0	3.46767	0.109	0.01	0	211329	N0
H2ac13	0	7.47358	0.1	0.001	0	319191	N0
Nutf2-ps1	0	3.85384	0.106	0.007	0	100043462	N0
Patz1	0	2.56334	0.115	0.017	0	56218	N0
Cdkal1	0	2.39376	0.12	0.022	0	68916	N0
2610020C07Rik	0	3.5783	0.106	0.008	0	69918	N0
Arhgap10	0	2.5147	0.115	0.018	0	78514	N0
Cmc1	0	3.28579	0.108	0.011	0	67899	N0
Tmem209	0	2.78274	0.111	0.015	0	72649	N0
Gins3	0	4.64291	0.1	0.004	0	78833	N0
Rbm14	0	2.84684	0.111	0.015	0	56275	N0
Prpf19	0	3.15439	0.108	0.012	0	28000	N0
Arhgap21	0	2.59789	0.113	0.018	0	71435	N0
Scarb1	0	2.55623	0.113	0.018	0	20778	N0
Slc1a5	0	3.24332	0.109	0.014	0	20514	N0
Nfatc2ip	0	3.30228	0.105	0.01	0	18020	N0
2810004N23Rik	0	2.80282	0.11	0.015	0	66523	N0
Idh3a	0	4.01693	0.101	0.006	0	67834	N0
Nol11	0	2.86833	0.109	0.014	0	68979	N0
Tbc1d31	0	3.88499	0.102	0.007	0	210544	N0
Mrpl50	0	2.92598	0.107	0.013	0	28028	N0
Osgep	0	2.70375	0.109	0.015	0	66246	N0
Hist1h1e	0	5.16029	0.102	0.008	0	NA	N0
Hmgb2	0	2.40774	0.997	0.903	0	97165	N0
Gm50022	0	3.45657	0.101	0.009	0	NA	N0
Pop5	0	2.60507	0.109	0.017	0	117109	N0
Zfp422	0	3.19603	0.103	0.011	0	67255	N0
Ccp110	0	3.34238	0.101	0.01	0	101565	N0
Esf1	0	2.70547	0.106	0.015	0	66580	N0
Ift80	0	2.76573	0.106	0.015	0	68259	N0
Tmem147	0	3.07073	0.103	0.012	0	69804	N0
Mrpl46	0	2.58007	0.108	0.017	0	67308	N0
Rnf126	0	2.82607	0.104	0.014	0	70294	N0
Nme6	0	3.20889	0.1	0.011	0	54369	N0
Itpa	0	2.66056	0.105	0.016	0	16434	N0
Mrps11	0	2.9224	0.101	0.013	0	67994	N0
Lonrf3	0	2.80696	0.1	0.012	0	74365	N0
Ddx27	0	2.75318	0.103	0.015	0	228889	N0
Lonp1	0	2.89086	0.1	0.013	0	74142	N0
Alg13	0	2.66825	0.103	0.016	0	67574	N0
Ctc1	0	2.65571	0.1	0.014	0	68964	N0
Ttll5	0	2.68856	0.1	0.014	0	320244	N0
Prpf31	5.06113e-303	2.57306	0.104	0.017	1.23633e-298	68988	N0
Mtmr2	1.15906e-302	2.61934	0.1	0.016	2.83135e-298	77116	N0
Ddx19a	6.50731e-301	2.48457	0.111	0.019	1.58961e-296	13680	N0
Abcb7	1.57305e-300	2.05053	0.15	0.035	3.84264e-296	11306	N0
Phf6	8.5975e-297	2.2014	0.13	0.027	2.1002e-292	70998	N0
Mre11a	1.84606e-296	2.37041	0.11	0.019	4.50954e-292	17535	N0
Pde6d	5.87818e-295	2.03964	0.15	0.035	1.43592e-290	18582	N0
Tecpr2	2.03106e-294	2.14689	0.145	0.033	4.96147e-290	104859	N0
Scrib	8.76978e-294	2.16662	0.133	0.028	2.14228e-289	105782	N0
Ampd2	2.76832e-293	2.11554	0.141	0.032	6.76244e-289	109674	N0
Orc5	2.77122e-293	2.58072	0.101	0.016	6.76955e-289	26429	N0
Pdzd11	3.42787e-292	2.10893	0.144	0.033	8.3736e-288	72621	N0
Cct3	5.69134e-291	2.42146	0.123	0.024	1.39028e-286	12462	N0
Psmg4	3.21263e-288	2.28243	0.123	0.025	7.8478e-284	69666	N0
Glo1	1.24837e-287	2.6796	0.102	0.017	3.04952e-283	109801	N0
Phf2	2.49939e-287	2.01689	0.156	0.038	6.1055e-283	18676	N0
Adh5	3.04163e-287	2.03103	0.15	0.036	7.4301e-283	11532	N0
Prkcsh	7.00265e-287	2.25852	0.126	0.026	1.71061e-282	19089	N0
Pabpc4	9.65568e-286	2.9111	0.102	0.017	2.35869e-281	230721	N0
Cnpy2	3.97809e-284	2.06558	0.142	0.032	9.71768e-280	56530	N0
Bud23	2.77849e-283	2.4138	0.11	0.02	6.7873e-279	66138	N0
Ipo9	1.5667e-282	2.53392	0.101	0.017	3.82713e-278	226432	N0
Thoc1	6.62105e-282	2.25708	0.117	0.023	1.61739e-277	225160	N0
Mrpl27	5.25354e-281	2.19107	0.128	0.027	1.28333e-276	94064	N0
Snhg7	1.62797e-278	2.31927	0.118	0.023	3.9768e-274	72091	N0
Lzic	9.27703e-278	2.3806	0.109	0.02	2.26619e-273	69151	N0
Eif2a	2.05105e-277	2.06488	0.14	0.032	5.01031e-273	229317	N0
Snhg5	7.01379e-274	2.18851	0.124	0.026	1.71333e-269	72655	N0
Raver1	8.49989e-271	2.16142	0.124	0.026	2.07635e-266	71766	N0
Dpy19l4	3.35611e-269	2.19668	0.118	0.024	8.1983e-265	381510	N0
Zfp395	2.46281e-268	2.29334	0.105	0.019	6.01616e-264	380912	N0
Dpp9	5.72292e-268	2.31057	0.113	0.022	1.398e-263	224897	N0
Uqcc2	4.08706e-267	2.20371	0.126	0.028	9.98388e-263	67267	N0
Psmd9	9.327e-265	2.01635	0.151	0.039	2.2784e-260	67151	N0
Pigu	1.92144e-260	2.20808	0.116	0.024	4.69368e-256	228812	N0
Cherp	9.40428e-260	2.04565	0.127	0.029	2.29728e-255	27967	N0
Ddhd1	5.51376e-255	2.1124	0.121	0.027	1.3469e-250	114874	N0
Ppa2	1.07024e-254	2.23446	0.107	0.021	2.61439e-250	74776	N0
Pdss1	3.58993e-254	2.09886	0.118	0.025	8.76947e-250	56075	N0
Slc7a1	3.90379e-254	2.04389	0.124	0.028	9.53618e-250	11987	N0
Gpaa1	9.35163e-253	2.04365	0.13	0.031	2.28442e-248	14731	N0
E2f4	1.18724e-252	2.23545	0.118	0.025	2.90018e-248	104394	N0
Mrpl45	2.62835e-251	2.0175	0.137	0.034	6.42054e-247	67036	N0
Polr2d	2.6865e-251	2.05352	0.129	0.03	6.56259e-247	69241	N0
Plscr3	9.04201e-251	2.34032	0.105	0.021	2.20878e-246	70310	N0
Acaa2	1.36389e-247	2.07291	0.123	0.028	3.33171e-243	52538	N0
Lrp8	1.69515e-247	2.2154	0.11	0.023	4.14091e-243	16975	N0
Gnpat	5.64813e-246	2.24941	0.106	0.021	1.37972e-241	14712	N0
Fanca	5.81657e-246	2.09442	0.123	0.028	1.42087e-241	14087	N0
Blmh	2.15401e-245	2.05339	0.129	0.031	5.26181e-241	104184	N0
Otud4	5.53371e-244	2.09457	0.117	0.026	1.35178e-239	73945	N0
Cdc25b	2.67855e-241	2.43997	0.125	0.03	6.54317e-237	12531	N0
Prdx2	2.41841e-239	3.53308	0.129	0.032	5.9077e-235	21672	N0
Pam16	1.77717e-236	2.27364	0.101	0.02	4.34127e-232	66449	N0
Ino80e	8.76712e-236	2.16569	0.108	0.023	2.14163e-231	233875	N0
1700037H04Rik	4.87024e-235	2.07544	0.119	0.027	1.1897e-230	NA	N0
Ppp1r12b	7.18983e-235	2.13508	0.109	0.023	1.75633e-230	329251	N0
Naxe	2.67731e-234	2.02596	0.124	0.03	6.54013e-230	246703	N0
Dgcr6	8.33047e-234	2.29202	0.102	0.021	2.03497e-229	13353	N0
Ciao2b	2.16479e-229	2.13314	0.113	0.025	5.28816e-225	68523	N0
Pebp1	7.76681e-228	2.18794	0.122	0.029	1.89728e-223	23980	N0
Hars	2.55435e-227	2.00319	0.129	0.033	6.23977e-223	NA	N0
Hdac3	1.82824e-224	2.02506	0.115	0.027	4.46603e-220	15183	N0
Dicer1	3.95996e-224	2.00182	0.117	0.028	9.6734e-220	192119	N0
Mydgf	4.57071e-221	2.03326	0.115	0.027	1.11653e-216	28106	N0
Akt3	1.87654e-219	2.04234	0.111	0.025	4.584e-215	23797	N0
1110038F14Rik	1.99831e-219	2.01192	0.115	0.027	4.88148e-215	117171	N0
Spg7	3.27686e-219	2.06216	0.112	0.026	8.00472e-215	234847	N0
Idh3b	1.13692e-211	2.06893	0.11	0.026	2.77726e-207	170718	N0
Hace1	1.08142e-210	2.06084	0.111	0.026	2.64169e-206	209462	N0
Dera	3.10819e-210	2.05674	0.109	0.026	7.59268e-206	232449	N0
Chd9	3.83613e-209	2.03188	0.106	0.024	9.3709e-205	109151	N0
Slc50a1	3.19855e-208	2.02744	0.107	0.025	7.81342e-204	19729	N0
Cep78	8.44261e-206	2.09158	0.101	0.023	2.06236e-201	208518	N0
Septin5	2.66004e-204	2.13585	0.101	0.023	6.49794e-200	18951	N0
Gclc	8.60562e-185	2.42347	0.109	0.028	2.10218e-180	14629	N0
H2afy	8.72955e-182	2.39422	0.125	0.037	2.13246e-177	NA	N0
Hspe1	1.23043e-173	2.25525	0.131	0.041	3.00569e-169	15528	N0
H2afz	1.36125e-92	3.25782	0.161	0.086	3.32527e-88	NA	N0
Blvrb	2.11332e-86	2.78898	0.117	0.05	5.16242e-82	233016	N0
Crip1	6.69542e-85	2.15387	0.101	0.041	1.63556e-80	12925	N0
Hbb-bs	9.21732e-34	3.22283	0.061	0.121	2.25161e-29	100503605	N0
Ltf	0	3.20889	0.965	0.305	0	17002	N1
Adpgk	0	2.21339	0.962	0.328	0	72141	N1
Cd177	0	2.14712	0.972	0.352	0	68891	N1
Abca13	0	2.41799	0.8	0.181	0	268379	N1
Anxa3	0	2.22695	0.858	0.261	0	11745	N1
Cpne3	0	2.37228	0.817	0.234	0	70568	N1
Golim4	0	2.70778	0.72	0.146	0	73124	N1
Itgb2l	0	2.29649	0.745	0.176	0	16415	N1
Cybb	0	2.56884	0.966	0.399	0	13058	N1
Lta4h	0	2.28774	0.708	0.158	0	16993	N1
Ly6a2	0	2.4321	0.811	0.264	0	546643	N1
Ly6g	0	2.00048	0.878	0.332	0	546644	N1
Camp	0	2.32959	0.973	0.429	0	12796	N1
Tbc1d8	0	2.06757	0.767	0.227	0	54610	N1
Syne1	0	2.13539	0.97	0.43	0	64009	N1
AA467197	0	2.29551	0.937	0.398	0	433470	N1
Ltb4r1	0	2.00695	0.793	0.257	0	16995	N1
Ngp	0	2.54423	0.991	0.475	0	18054	N1
Nhsl2	0	2.21482	0.638	0.158	0	100042480	N1
Capg	0	2.02551	0.623	0.165	0	12332	N1
Ifitm6	0	2.2518	0.991	0.541	0	213002	N1
Ceacam1	0	2.01436	0.62	0.178	0	26365	N1
Aoah	0	2.4108	0.545	0.118	0	27052	N1
Plekhg1	0	2.26109	0.52	0.116	0	213783	N1
Zmpste24	0	3.00875	0.473	0.082	0	230709	N1
F730016J06Rik	0	3.48068	0.43	0.044	0	100504177	N1
4930438A08Rik	0	2.40869	0.485	0.101	0	73988	N1
Plscr1	0	2.1232	0.537	0.154	0	22038	N1
Ly75	0	2.42766	0.485	0.104	0	17076	N1
Trp53inp2	0	2.49055	0.465	0.096	0	68728	N1
Slc25a24	0	2.26057	0.454	0.101	0	229731	N1
Orm1	0	2.27798	0.44	0.092	0	18405	N1
Ppm1m	0	2.02608	0.463	0.12	0	67905	N1
Olfml2b	0	2.55769	0.415	0.074	0	320078	N1
1700047M11Rik	0	2.48386	0.416	0.077	0	67330	N1
Cd81	0	2.00822	0.403	0.1	0	12520	N1
Mppe1	0	2.53976	0.364	0.067	0	225651	N1
1500015L24Rik	0	2.4909	0.356	0.067	0	68994	N1
Agl	0	2.22597	0.363	0.076	0	77559	N1
Tmem216	0	2.62604	0.349	0.062	0	68642	N1
Fmo5	0	2.19655	0.362	0.081	0	14263	N1
Lbp	0	2.42996	0.345	0.066	0	16803	N1
Lmo1	0	2.73217	0.333	0.055	0	109594	N1
Acvrl1	0	2.18694	0.376	0.101	0	11482	N1
Rpe	0	2.04771	0.366	0.094	0	66646	N1
Anxa7	0	2.09304	0.352	0.085	0	11750	N1
Ppp1r42	0	2.11447	0.337	0.079	0	69312	N1
Irag2	0	2.3223	0.323	0.066	0	16970	N1
Krt83	0	2.31003	0.329	0.072	0	100126226	N1
Gm47071	0	2.565	0.31	0.057	0	NA	N1
Anxa5	0	2.00499	0.324	0.077	0	11747	N1
Aff2	0	2.0852	0.329	0.084	0	14266	N1
Anxa1	0	2.02815	0.995	0.751	0	16952	N1
Fbxo10	0	3.06309	0.279	0.036	0	269529	N1
Cpa6	0	2.07127	0.311	0.07	0	329093	N1
Tst	0	2.3912	0.298	0.058	0	22117	N1
Usp46	0	2.13718	0.309	0.07	0	69727	N1
Gm57005	0	2.67126	0.284	0.047	0	NA	N1
Slc17a9	0	3.09336	0.268	0.034	0	228993	N1
Rhou	0	2.64663	0.278	0.047	0	69581	N1
Gm30716	0	2.64727	0.277	0.047	0	102632720	N1
Ica1	0	2.37044	0.29	0.06	0	15893	N1
Trak2	0	2.09469	0.297	0.071	0	70827	N1
S1pr4	0	2.16204	0.286	0.065	0	13611	N1
Gm56622	0	2.80595	0.245	0.038	0	NA	N1
Tmem160	0	2.03982	0.266	0.065	0	69094	N1
Prom1	0	2.33485	0.249	0.051	0	19126	N1
Slc39a11	0	2.17756	0.256	0.058	0	69806	N1
Erg	0	2.46443	0.24	0.046	0	13876	N1
Stk39	0	2.10072	0.253	0.06	0	53416	N1
Smg9	0	2.11709	0.251	0.059	0	71997	N1
Gys1	0	2.30708	0.243	0.051	0	14936	N1
Nucb2	0	2.01553	0.239	0.059	0	53322	N1
Glp2r	0	2.16453	0.231	0.052	0	93896	N1
Reck	0	2.42629	0.22	0.041	0	53614	N1
Septin1	0	2.14315	0.229	0.053	0	54204	N1
Mlst8	0	2.90451	0.198	0.028	0	56716	N1
Cldn1	0	2.13698	0.215	0.047	0	12737	N1
Platr7	0	2.35332	0.207	0.04	0	442847	N1
Tex15	0	2.86307	0.192	0.027	0	104271	N1
Tbcel	0	2.06287	0.213	0.049	0	272589	N1
Tnnt1	0	2.47397	0.198	0.037	0	21955	N1
Cd200r1	0	2.40379	0.194	0.036	0	57781	N1
Chil5	0	2.67619	0.18	0.028	0	229687	N1
Manea	0	3.01757	0.174	0.023	0	242362	N1
Ffar2	0	2.23122	0.186	0.04	0	233079	N1
Igsf5	0	2.16628	0.186	0.041	0	72058	N1
Got1	0	2.03916	0.188	0.045	0	14718	N1
Usp5	0	2.21859	0.182	0.04	0	22225	N1
A630001G21Rik	0	2.02735	0.181	0.044	0	319997	N1
Rps6kc1	0	3.04928	0.157	0.02	0	320119	N1
Mapk7	0	2.05323	0.173	0.041	0	23939	N1
Smim5	0	2.59036	0.158	0.027	0	66528	N1
9830166K06Rik	0	2.87572	0.15	0.021	0	402757	N1
Ldhc	0	3.66823	0.141	0.013	0	16833	N1
Gm26797	0	2.33361	0.156	0.03	0	108167690	N1
Ube2l6	0	2.17916	0.156	0.034	0	56791	N1
Pip4k2b	0	2.05848	0.158	0.036	0	108083	N1
Nqo2	0	2.14642	0.157	0.036	0	18105	N1
Tspan32	0	2.06007	0.154	0.036	0	27027	N1
Nrp1	0	2.88373	0.132	0.018	0	18186	N1
Kcnab2	0	2.11956	0.149	0.035	0	16498	N1
Dok2	0	2.48614	0.137	0.025	0	13449	N1
Selenoo	0	2.80237	0.131	0.019	0	223776	N1
C1rl	0	2.02202	0.142	0.034	0	232371	N1
Paqr7	0	2.2274	0.133	0.029	0	71904	N1
St3gal2	0	2.09995	0.136	0.032	0	20444	N1
Rgp1	0	2.00181	0.136	0.033	0	242406	N1
Lpcat1	0	2.09595	0.132	0.031	0	210992	N1
Tmem205	0	2.09135	0.129	0.03	0	235043	N1
Lin28a	0	2.05159	0.121	0.029	0	83557	N1
Ccdc167	0	2.02278	0.122	0.03	0	68597	N1
Thap4	0	2.01493	0.12	0.029	0	67026	N1
Wdr41	0	2.06851	0.118	0.028	0	218460	N1
Itgb3	0	2.00214	0.114	0.027	0	16416	N1
Prrc1	0	2.13528	0.111	0.024	0	73137	N1
Stradb	0	2.26329	0.102	0.021	0	227154	N1
Il1b	0	5.13732	0.857	0.083	0	16176	N2
Clec4d	0	4.24124	0.916	0.148	0	17474	N2
Wfdc17	0	5.18813	0.803	0.079	0	100034251	N2
Cxcl2	0	4.6106	0.877	0.165	0	20310	N2
Ifitm1	0	5.07691	0.803	0.095	0	68713	N2
Acod1	0	4.74488	0.802	0.099	0	16365	N2
Ccl6	0	3.67483	0.762	0.115	0	20305	N2
Nlrp3	0	4.56275	0.689	0.069	0	216799	N2
Dusp1	0	3.67892	0.823	0.207	0	19252	N2
Pim1	0	3.62572	0.8	0.195	0	18712	N2
Rnf149	0	3.25101	0.817	0.222	0	67702	N2
Sirpb1b	0	4.58374	0.637	0.051	0	668101	N2
Clec7a	0	4.65341	0.649	0.067	0	56644	N2
Zeb2	0	3.59198	0.741	0.168	0	24136	N2
Slc7a11	0	3.50292	0.848	0.279	0	26570	N2
Arg2	0	3.10287	0.728	0.162	0	11847	N2
Entpd1	0	3.30189	0.792	0.233	0	12495	N2
Tpd52	0	2.85456	0.902	0.343	0	21985	N2
Pla2g7	0	3.70296	0.585	0.069	0	27226	N2
Cyp4f18	0	3.0743	0.649	0.144	0	72054	N2
Fxyd5	0	2.90714	0.963	0.463	0	18301	N2
Csf3r	0	2.77446	0.898	0.403	0	12986	N2
Smox	0	3.60096	0.593	0.1	0	228608	N2
Trps1	0	3.30978	0.629	0.151	0	83925	N2
Clec4e	0	2.76314	0.886	0.409	0	56619	N2
Marcks	0	3.47301	0.574	0.104	0	17118	N2
Tnfrsf1b	0	3.54617	0.568	0.1	0	21938	N2
Nfkbiz	0	2.30997	0.825	0.361	0	80859	N2
Pik3ap1	0	2.96425	0.737	0.276	0	83490	N2
Irak2	0	2.88595	0.657	0.198	0	108960	N2
Plek	0	2.87011	0.914	0.458	0	56193	N2
Il1r2	0	2.78696	0.858	0.405	0	16178	N2
Ninj1	0	3.67023	0.525	0.079	0	18081	N2
Snap23	0	2.53075	0.661	0.216	0	20619	N2
Alcam	0	2.93591	0.837	0.392	0	11658	N2
Slc15a3	0	3.15084	0.546	0.103	0	65221	N2
Gm5150	0	4.73448	0.466	0.032	0	381484	N2
Hcar2	0	3.51168	0.535	0.104	0	80885	N2
Junb	0	2.53347	0.778	0.351	0	16477	N2
Pde4b	0	2.29711	0.748	0.327	0	18578	N2
Ell2	0	3.13944	0.578	0.157	0	192657	N2
Ptafr	0	2.32645	0.681	0.272	0	19204	N2
Cd300ld	0	3.25602	0.49	0.081	0	217305	N2
Ier5	0	2.45014	0.606	0.204	0	15939	N2
Picalm	0	2.19534	0.844	0.445	0	233489	N2
Klra2	0	3.01255	0.483	0.09	0	16633	N2
Tpm4	0	2.51556	0.53	0.138	0	326618	N2
Ets2	0	2.22754	0.69	0.298	0	23872	N2
Xylt1	0	2.31371	0.866	0.475	0	233781	N2
Emilin2	0	2.34323	0.561	0.17	0	246707	N2
Resf1	0	2.42893	0.687	0.298	0	67246	N2
Cd14	0	3.26209	0.687	0.301	0	12475	N2
Slc16a3	0	2.09103	0.708	0.323	0	80879	N2
Sema4d	0	2.27239	0.663	0.279	0	20354	N2
Cass4	0	3.45732	0.458	0.076	0	320664	N2
Fbxo11	0	2.42983	0.661	0.28	0	225055	N2
Ankrd33b	0	2.50445	0.537	0.159	0	67434	N2
Stfa2l1	0	3.41102	0.474	0.099	0	268885	N2
Ccl3	0	3.45103	0.484	0.11	0	20302	N2
Zfp36l1	0	3.47289	0.445	0.071	0	12192	N2
Selplg	0	2.16935	0.621	0.25	0	20345	N2
Atp2b1	0	2.51822	0.749	0.381	0	67972	N2
Neurl3	0	2.60042	0.495	0.139	0	214854	N2
Fndc3b	0	2.44694	0.586	0.23	0	72007	N2
Tnfaip3	0	3.25393	0.438	0.083	0	21929	N2
Ccrl2	0	4.61828	0.391	0.038	0	54199	N2
H2-Q10	0	4.11874	0.391	0.038	0	15007	N2
Mbnl2	0	2.2358	0.667	0.315	0	105559	N2
Hif1a	0	2.30793	0.571	0.22	0	15251	N2
Gsap	0	2.04676	0.637	0.293	0	212167	N2
Antxr2	0	2.4202	0.927	0.584	0	71914	N2
Fgl2	0	4.78675	0.367	0.024	0	14190	N2
Rab11fip1	0	2.04702	0.62	0.279	0	75767	N2
St3gal6	0	3.75828	0.382	0.045	0	54613	N2
Tlr2	0	2.45924	0.479	0.144	0	24088	N2
Srgn	0	3.41114	0.997	0.67	0	19073	N2
Cstdc4	0	3.6997	0.378	0.054	0	433016	N2
Chst11	0	2.25659	0.585	0.262	0	58250	N2
Tnfaip2	0	2.44061	0.567	0.244	0	21928	N2
Spag9	0	2.11734	0.738	0.416	0	70834	N2
Jak2	0	2.94288	0.439	0.117	0	16452	N2
Tgm2	0	3.43207	0.374	0.053	0	21817	N2
Il1rn	0	2.9792	0.469	0.148	0	16181	N2
Bcl2l11	0	2.38623	0.492	0.172	0	12125	N2
Cytip	0	2.06626	0.548	0.229	0	227929	N2
Sirpb1c	0	4.84155	0.334	0.018	0	100038947	N2
Birc3	0	2.24639	0.5	0.186	0	11796	N2
Bcl2a1b	0	4.09568	0.348	0.037	0	12045	N2
Tspan13	0	3.54197	0.347	0.037	0	66109	N2
Arhgap26	0	2.33581	0.511	0.201	0	71302	N2
Scgb1a1	0	2.16979	0.334	0.03	0	22287	N2
Fas	0	2.63551	0.403	0.099	0	14102	N2
Kpna4	0	2.10586	0.6	0.296	0	16649	N2
Asprv1	0	2.39395	0.507	0.205	0	67855	N2
Cd274	0	4.48804	0.322	0.028	0	60533	N2
Tgfbi	0	2.26331	0.427	0.136	0	21810	N2
St8sia4	0	3.73804	0.335	0.045	0	20452	N2
Ppp1r15a	0	4.07454	0.323	0.034	0	17872	N2
Csf1	0	4.46651	0.319	0.031	0	12977	N2
Slc44a1	0	3.95437	0.32	0.035	0	100434	N2
Plk3	0	2.02672	0.462	0.177	0	12795	N2
Gm2a	0	3.37336	0.334	0.053	0	14667	N2
Slc11a1	0	2.61354	0.369	0.093	0	18173	N2
Fem1c	0	2.11784	0.441	0.165	0	240263	N2
Ier3	0	2.26635	0.457	0.183	0	15937	N2
Basp1	0	3.30024	0.324	0.052	0	70350	N2
Gk	0	2.16299	0.447	0.178	0	14933	N2
Gadd45b	0	2.54773	0.429	0.162	0	17873	N2
Ptgs2	0	4.73885	0.286	0.019	0	19225	N2
Dusp16	0	2.30805	0.428	0.163	0	70686	N2
Metrnl	0	3.10137	0.32	0.056	0	210029	N2
Myo1d	0	2.62155	0.373	0.112	0	338367	N2
Lrrc25	0	2.33475	0.363	0.103	0	211228	N2
Arhgap24	0	2.16379	0.378	0.12	0	231532	N2
Il13ra1	0	3.98334	0.28	0.025	0	16164	N2
Ccl4	0	4.42787	0.283	0.03	0	20303	N2
Mirt2	0	2.03732	0.375	0.123	0	100038659	N2
Atf3	0	3.50448	0.289	0.043	0	11910	N2
Dusp5	0	2.64302	0.319	0.074	0	240672	N2
Btg1	0	2.42229	0.993	0.751	0	12226	N2
Cd101	0	3.31661	0.285	0.045	0	630146	N2
Il15	0	2.16614	0.364	0.129	0	16168	N2
Plekhm3	0	3.48692	0.274	0.041	0	241075	N2
Rbm47	0	2.03117	0.393	0.161	0	245945	N2
Isg20	0	2.81017	0.29	0.059	0	57444	N2
Gcnt1	0	2.45043	0.307	0.078	0	14537	N2
Mir22hg	0	2.04004	0.338	0.111	0	100042498	N2
Lpin2	0	2.00632	0.372	0.149	0	64898	N2
Gpr132	0	3.8408	0.246	0.026	0	56696	N2
Igfbp6	0	5.52186	0.225	0.007	0	16012	N2
Myadm	0	2.38154	0.3	0.082	0	50918	N2
Jaml	0	3.70367	0.249	0.032	0	270152	N2
Mefv	0	3.39608	0.252	0.036	0	54483	N2
Slc2a6	0	3.88357	0.235	0.02	0	227659	N2
Mpeg1	0	2.47908	0.286	0.071	0	17476	N2
Cstb	0	2.1922	0.48	0.266	0	13014	N2
Tlr13	0	2.03833	0.319	0.106	0	279572	N2
Pde7b	0	3.60045	0.244	0.031	0	29863	N2
Abca1	0	3.73737	0.238	0.027	0	11303	N2
Gch1	0	2.47422	0.287	0.076	0	14528	N2
Peak1	0	2.96891	0.258	0.051	0	244895	N2
Tgif1	0	2.51443	0.277	0.072	0	21815	N2
4833407H14Rik	0	2.56191	0.266	0.061	0	73899	N2
Gm41409	0	5.16305	0.212	0.008	0	105246058	N2
Cebpb	0	2.61483	0.988	0.784	0	12608	N2
Il10ra	0	2.42907	0.268	0.066	0	16154	N2
Egr1	0	2.50915	0.266	0.073	0	13653	N2
Cxcl3	0	4.68667	0.206	0.014	0	330122	N2
Gm56955	0	4.48929	0.201	0.012	0	NA	N2
Socs3	0	3.82155	0.208	0.021	0	12702	N2
Arrdc4	0	2.14403	0.28	0.094	0	66412	N2
4933432I03Rik	0	3.70166	0.206	0.021	0	71264	N2
Grk5	0	3.10897	0.227	0.042	0	14773	N2
Isg15	0	3.68819	0.223	0.039	0	100038882	N2
Steap4	0	5.11623	0.191	0.008	0	117167	N2
Clec4n	0	4.53894	0.195	0.012	0	56620	N2
Tnip1	0	2.08723	0.269	0.088	0	57783	N2
4732465J04Rik	0	2.93	0.219	0.04	0	414105	N2
Zfp263	0	2.82475	0.223	0.045	0	74120	N2
Gpr35	0	4.62436	0.185	0.009	0	64095	N2
St3gal1	0	2.02202	0.301	0.125	0	20442	N2
Tnfrsf23	0	2.3746	0.247	0.072	0	79201	N2
ENSMUSG00000121485	0	2.75372	0.221	0.046	0	NA	N2
Hspa4l	0	2.20421	0.324	0.153	0	18415	N2
Nr4a3	0	4.26257	0.184	0.014	0	18124	N2
Ptgs2os2	0	3.88858	0.185	0.016	0	102639566	N2
Gm15832	0	2.88662	0.2	0.034	0	NA	N2
Aim2	0	2.86509	0.217	0.051	0	383619	N2
Isy1	0	2.05736	0.265	0.099	0	57905	N2
Gm16556	0	2.70714	0.204	0.041	0	NA	N2
Gla	0	2.20051	0.234	0.072	0	11605	N2
Sfxn5	0	2.17491	0.246	0.084	0	94282	N2
Lfng	0	3.03966	0.19	0.03	0	16848	N2
Ifitm2	0	2.27297	0.982	0.823	0	80876	N2
Scarb2	0	2.01373	0.238	0.081	0	12492	N2
Slc2a1	0	2.06899	0.221	0.067	0	20525	N2
Traf1	0	3.59546	0.171	0.018	0	22029	N2
Gm57366	0	4.61778	0.159	0.009	0	NA	N2
Cd44	0	2.02136	0.985	0.838	0	12505	N2
Prkch	0	2.94511	0.182	0.035	0	18755	N2
Fnip2	0	2.06624	0.255	0.109	0	329679	N2
Nfkbia	0	2.11559	0.898	0.752	0	18035	N2
Gm17749	0	4.28536	0.154	0.011	0	434410	N2
Relb	0	2.10154	0.2	0.06	0	19698	N2
Csf1r	0	3.11863	0.161	0.023	0	12978	N2
Il1a	0	4.54666	0.146	0.008	0	16175	N2
Maff	0	3.70772	0.151	0.015	0	17133	N2
Nfkbie	0	2.51282	0.177	0.041	0	18037	N2
Bcl3	0	2.15567	0.169	0.047	0	12051	N2
Csrnp1	0	2.29737	0.174	0.052	0	215418	N2
Oasl2	0	2.86963	0.149	0.029	0	23962	N2
Gm20186	0	2.57828	0.158	0.038	0	100504344	N2
Maml3	0	2.82901	0.148	0.029	0	433586	N2
Ggct	0	2.95125	0.145	0.028	0	110175	N2
Arl4c	0	3.56307	0.13	0.014	0	320982	N2
Icam1	0	3.76437	0.129	0.014	0	15894	N2
Rtp4	0	2.55267	0.15	0.035	0	67775	N2
Cd244a	0	4.9281	0.119	0.005	0	18106	N2
Tnfsf14	0	2.34726	0.151	0.038	0	50930	N2
Adgre1	0	3.08708	0.132	0.021	0	13733	N2
Lypd6b	0	4.45605	0.117	0.007	0	71897	N2
Bcl2a1d	0	3.25305	0.116	0.015	0	12047	N2
Fth1	0	2.31411	1	0.986	0	14319	N2
Gm34455	1.00109e-306	3.25849	0.109	0.013	2.44545e-302	102637715	N2
Srxn1	2.73373e-304	3.37274	0.106	0.012	6.67794e-300	76650	N2
Slc43a2	6.62412e-304	2.0842	0.186	0.064	1.61814e-299	215113	N2
Pttg1	5.99696e-303	2.04951	0.181	0.059	1.46494e-298	30939	N2
Aqp9	5.14327e-301	2.17465	0.161	0.046	1.2564e-296	64008	N2
Gm40528	4.6627e-297	2.68333	0.126	0.024	1.139e-292	105245014	N2
Dusp2	3.95703e-296	2.67202	0.129	0.026	9.66623e-292	13537	N2
Slc9a9	1.11452e-285	2.83244	0.128	0.028	2.72255e-281	331004	N2
Retn	3.3212e-279	3.23641	0.101	0.013	8.11303e-275	57264	N2
Gm17619	4.52251e-277	2.19751	0.144	0.039	1.10476e-272	100502923	N2
Slc38a1	3.95885e-274	2.05101	0.194	0.076	9.67068e-270	105727	N2
Itgax	3.51334e-273	3.01821	0.1	0.013	8.58238e-269	16411	N2
Gngt2	1.09965e-272	2.52673	0.125	0.028	2.68623e-268	14710	N2
Lilra6	2.9963e-272	2.03611	0.152	0.045	7.31935e-268	18726	N2
Trim30d	3.64466e-271	2.79931	0.123	0.027	8.90317e-267	209387	N2
Treml4	2.87498e-265	2.05153	0.164	0.055	7.02301e-261	224840	N2
C9orf72	6.46939e-254	2.07976	0.146	0.045	1.58034e-249	73205	N2
Plk2	1.83389e-234	2.6028	0.111	0.025	4.47982e-230	20620	N2
Sycp2	5.5744e-234	2.55998	0.109	0.024	1.36171e-229	320558	N2
Mrps28	4.63391e-233	2.27119	0.144	0.048	1.13197e-228	66230	N2
Gm56730	3.49033e-215	2.17923	0.118	0.033	8.52617e-211	NA	N2
Apoe	4.21496e-215	2.54728	0.101	0.022	1.02963e-210	11816	N2
Pmaip1	3.15311e-213	2.31293	0.128	0.041	7.70241e-209	58801	N2
Asph	5.97547e-203	2.33076	0.109	0.029	1.45969e-198	65973	N2
Tasl	1.67509e-202	2.35336	0.102	0.025	4.0919e-198	71398	N2
Abcc1	2.24934e-192	2.0108	0.126	0.043	5.49469e-188	17250	N2
Ralgds	6.72707e-188	2.11177	0.103	0.028	1.64329e-183	19730	N2
Creb5	2.50126e-181	2.20231	0.101	0.028	6.11007e-177	231991	N2
Tlr6	2.70638e-178	2.04753	0.101	0.029	6.61116e-174	21899	N2
Spp1	2.39462e-138	2.20341	0.167	0.09	5.84958e-134	20750	N2

## Sheet: Table 3 EAE vs naïve 
p_val	avg_log2FC	pct.1	pct.2	p_val_adj	gene	cluster	Type	Tissue
2.58398e-46	1.73867	0.994	0.912	6.31215e-42	Sem1	N0	Up	Spleen
8.60083e-44	4.42917	0.897	0.11	2.10101e-39	Syne1	N0	Up	Spleen
3.61945e-42	2.79753	0.925	0.451	8.84158e-38	S100a11	N0	Up	Spleen
4.92772e-42	3.84841	0.923	0.121	1.20374e-37	S100a8	N0	Up	Spleen
5.81225e-42	3.53823	0.914	0.154	1.41982e-37	Gsr	N0	Up	Spleen
9.11478e-41	3.23652	0.92	0.363	2.22656e-36	Prdx5	N0	Up	Spleen
2.08553e-40	1.58813	0.958	0.945	5.09454e-36	Tmsb4x	N0	Up	Spleen
4.10099e-40	3.76147	0.891	0.132	1.00179e-35	Adpgk	N0	Up	Spleen
6.17802e-39	3.39217	0.888	0.209	1.50917e-34	Serpinb1a	N0	Up	Spleen
1.78725e-38	2.96554	0.91	0.22	4.36589e-34	Dstn	N0	Up	Spleen
2.77147e-38	3.06717	0.894	0.231	6.77016e-34	Lamtor4	N0	Up	Spleen
7.6228e-38	1.30123	0.993	0.934	1.8621e-33	Txn1	N0	Up	Spleen
8.36372e-38	2.30878	0.951	0.44	2.04309e-33	Tspo	N0	Up	Spleen
1.89697e-37	2.57373	0.906	0.132	4.63393e-33	Pglyrp1	N0	Up	Spleen
4.30345e-37	2.6654	0.919	0.429	1.05125e-32	Cybb	N0	Up	Spleen
2.43748e-36	3.36882	0.855	0.264	5.95428e-32	Ripor2	N0	Up	Spleen
1.43703e-34	2.64866	0.903	0.121	3.51039e-30	Tyrobp	N0	Up	Spleen
2.14849e-34	2.18594	0.884	0.11	5.24834e-30	Ly6c2	N0	Up	Spleen
4.24376e-34	1.74203	0.935	0.791	1.03667e-29	Cyba	N0	Up	Spleen
1.02854e-31	3.22494	0.808	0.11	2.51251e-27	Cebpd	N0	Up	Spleen
1.40582e-31	3.53878	0.803	0.11	3.43414e-27	Plaur	N0	Up	Spleen
5.50747e-30	2.2062	0.868	0.275	1.34536e-25	Msrb1	N0	Up	Spleen
9.95043e-30	2.19806	0.877	0.341	2.43069e-25	Ncf1	N0	Up	Spleen
1.9266e-29	2.24113	0.881	0.253	4.7063e-25	Spi1	N0	Up	Spleen
2.12554e-28	1.86667	0.891	0.429	5.19227e-24	Ostf1	N0	Up	Spleen
5.76857e-28	2.43368	0.845	0.198	1.40915e-23	Ap3s1	N0	Up	Spleen
1.03061e-27	1.31095	0.941	0.89	2.51757e-23	Arhgdib	N0	Up	Spleen
1.23096e-27	3.257	0.764	0.143	3.00698e-23	Mgst2	N0	Up	Spleen
1.48105e-27	3.10849	0.757	0.121	3.61791e-23	Msra	N0	Up	Spleen
2.72937e-27	2.0695	0.874	0.253	6.66731e-23	Cd9	N0	Up	Spleen
6.77021e-27	1.48894	0.952	0.681	1.65383e-22	Itm2b	N0	Up	Spleen
4.79852e-26	2.51299	0.805	0.275	1.17218e-21	Arhgap15	N0	Up	Spleen
5.59184e-26	2.75753	0.78	0.176	1.36597e-21	Cpne3	N0	Up	Spleen
1.56618e-25	1.83407	0.875	0.451	3.82587e-21	Scp2	N0	Up	Spleen
6.44473e-25	2.71522	0.756	0.154	1.57432e-20	Cebpb	N0	Up	Spleen
7.14913e-25	3.11036	0.73	0.154	1.74639e-20	Elmo1	N0	Up	Spleen
5.21998e-24	1.30412	0.971	0.725	1.27514e-19	1810037I17Rik	N0	Up	Spleen
1.02114e-23	1.81711	0.865	0.341	2.49444e-19	Ncf4	N0	Up	Spleen
1.09148e-23	1.15723	0.967	0.681	2.66628e-19	Cd47	N0	Up	Spleen
2.59368e-23	1.69631	0.888	0.462	6.33584e-19	Aprt	N0	Up	Spleen
5.88447e-23	2.43097	0.749	0.176	1.43746e-18	Pgd	N0	Up	Spleen
1.29612e-22	3.25379	0.671	0.11	3.16617e-18	Svil	N0	Up	Spleen
1.42133e-22	2.07492	0.779	0.22	3.47203e-18	Rab5if	N0	Up	Spleen
1.61511e-22	1.9752	0.832	0.231	3.94538e-18	Lta4h	N0	Up	Spleen
3.44598e-22	1.61706	0.79	0.187	8.41784e-18	Ifitm3	N0	Up	Spleen
9.67065e-22	2.99153	0.673	0.132	2.36235e-17	Arfgef1	N0	Up	Spleen
3.73432e-21	2.76526	0.693	0.154	9.12221e-17	Cited2	N0	Up	Spleen
5.53066e-21	3.14903	0.67	0.132	1.35103e-16	Pag1	N0	Up	Spleen
8.3732e-21	2.9579	0.68	0.143	2.0454e-16	Id2	N0	Up	Spleen
6.82457e-20	1.41959	0.875	0.44	1.66711e-15	Gmfg	N0	Up	Spleen
7.453e-20	2.55692	0.676	0.165	1.82062e-15	Cxcr4	N0	Up	Spleen
2.23879e-19	2.23801	0.698	0.154	5.46892e-15	Pnkp	N0	Up	Spleen
3.80553e-19	2.13253	0.725	0.253	9.29615e-15	Fli1	N0	Up	Spleen
7.88543e-19	1.2233	0.926	0.571	1.92625e-14	Atp6v0c	N0	Up	Spleen
2.39905e-18	2.07769	0.72	0.22	5.86039e-14	Atp6v1e1	N0	Up	Spleen
2.73065e-18	2.3919	0.637	0.11	6.67042e-14	Actn1	N0	Up	Spleen
4.66778e-18	1.88217	0.737	0.264	1.14025e-13	Dock8	N0	Up	Spleen
1.14405e-17	2.53821	0.621	0.121	2.79468e-13	Cep128	N0	Up	Spleen
3.00617e-17	2.29439	0.669	0.187	7.34347e-13	Nin	N0	Up	Spleen
3.25387e-17	2.01967	0.636	0.143	7.94856e-13	Dleu2	N0	Up	Spleen
7.1661e-17	1.88858	0.701	0.264	1.75053e-12	Rnasek	N0	Up	Spleen
9.7841e-17	1.58774	0.813	0.363	2.39006e-12	Fam107b	N0	Up	Spleen
1.2282e-16	1.89678	0.696	0.176	3.00025e-12	Arrb2	N0	Up	Spleen
1.80643e-16	1.23938	0.889	0.495	4.41274e-12	Tuba4a	N0	Up	Spleen
3.2805e-16	2.18897	0.663	0.187	8.0136e-12	Ssh2	N0	Up	Spleen
4.15042e-16	1.52222	0.721	0.242	1.01387e-11	Cdkn2d	N0	Up	Spleen
5.91312e-16	1.23067	0.875	0.516	1.44446e-11	Ikzf1	N0	Up	Spleen
1.42701e-15	1.88695	0.642	0.209	3.48591e-11	Skap2	N0	Up	Spleen
1.45484e-15	2.15023	0.621	0.132	3.55389e-11	Lst1	N0	Up	Spleen
1.5391e-15	1.30123	0.721	0.231	3.75971e-11	Ifitm2	N0	Up	Spleen
2.11531e-15	1.08894	0.908	0.527	5.16727e-11	Rnaseh2c	N0	Up	Spleen
2.41013e-15	2.23287	0.634	0.187	5.88748e-11	Sorl1	N0	Up	Spleen
2.65633e-15	1.81152	0.682	0.22	6.48889e-11	Itgb2	N0	Up	Spleen
3.27507e-15	1.54276	0.717	0.22	8.00034e-11	Glrx	N0	Up	Spleen
3.85069e-15	1.18078	0.875	0.418	9.40647e-11	Emp3	N0	Up	Spleen
9.01149e-15	1.64792	0.708	0.286	2.20133e-10	Tnrc6b	N0	Up	Spleen
1.05755e-14	1.81216	0.656	0.165	2.58338e-10	Gsn	N0	Up	Spleen
1.30904e-14	1.47532	0.771	0.33	3.19772e-10	Ppp3ca	N0	Up	Spleen
1.41124e-14	1.98491	0.655	0.209	3.44736e-10	Baz2b	N0	Up	Spleen
1.74855e-14	2.5274	0.564	0.143	4.27136e-10	Acsl1	N0	Up	Spleen
3.59066e-14	1.3968	0.757	0.352	8.77126e-10	Nfkbia	N0	Up	Spleen
4.02034e-14	1.65507	0.705	0.242	9.82089e-10	Mettl9	N0	Up	Spleen
6.41128e-14	2.11724	0.58	0.154	1.56615e-09	Efhd2	N0	Up	Spleen
1.28412e-13	1.78056	0.648	0.231	3.13684e-09	Ethe1	N0	Up	Spleen
1.32338e-13	1.87825	0.643	0.231	3.23276e-09	Samsn1	N0	Up	Spleen
2.13175e-13	1.44491	0.672	0.22	5.20744e-09	Lmo4	N0	Up	Spleen
2.33706e-13	1.79548	0.616	0.22	5.70898e-09	Irf2bp2	N0	Up	Spleen
2.6788e-13	2.10158	0.563	0.143	6.54378e-09	Npepps	N0	Up	Spleen
3.25137e-13	1.81995	0.621	0.22	7.94245e-09	Cd44	N0	Up	Spleen
5.47724e-13	1.12036	0.828	0.462	1.33798e-08	Aldh2	N0	Up	Spleen
7.99633e-13	1.47967	0.676	0.286	1.95334e-08	Hipk1	N0	Up	Spleen
1.10178e-12	1.30477	0.744	0.385	2.69142e-08	Atp6v0b	N0	Up	Spleen
1.53846e-12	2.3809	0.523	0.143	3.75815e-08	Hcst	N0	Up	Spleen
3.07508e-12	2.49267	0.497	0.11	7.51181e-08	Srpk2	N0	Up	Spleen
3.09138e-12	2.4528	0.495	0.121	7.55162e-08	Hipk2	N0	Up	Spleen
4.75174e-12	1.30002	0.765	0.385	1.16076e-07	Ppp1cb	N0	Up	Spleen
5.8123e-12	1.28302	0.699	0.308	1.41983e-07	Ppp1r2	N0	Up	Spleen
7.23977e-12	1.24143	0.751	0.396	1.76853e-07	Flna	N0	Up	Spleen
1.35025e-11	1.3436	0.682	0.33	3.29839e-07	Slfn2	N0	Up	Spleen
1.59462e-11	2.19596	0.536	0.143	3.89534e-07	Rnaset2a	N0	Up	Spleen
2.12689e-11	2.17562	0.506	0.132	5.19558e-07	Rab28	N0	Up	Spleen
2.28646e-11	1.94194	0.524	0.165	5.58536e-07	Lamp2	N0	Up	Spleen
2.47896e-11	1.58395	0.636	0.253	6.0556e-07	Lims1	N0	Up	Spleen
2.48347e-11	2.09029	0.542	0.187	6.06663e-07	Dennd4a	N0	Up	Spleen
3.26235e-11	1.18998	0.754	0.385	7.96926e-07	Gpsm3	N0	Up	Spleen
3.67345e-11	1.82113	0.576	0.198	8.9735e-07	Mfsd14b	N0	Up	Spleen
4.06145e-11	1.85484	0.552	0.187	9.92132e-07	Tmed3	N0	Up	Spleen
4.31837e-11	2.51877	0.472	0.11	1.05489e-06	Tmcc1	N0	Up	Spleen
4.90472e-11	1.52251	0.598	0.198	1.19812e-06	Sp3	N0	Up	Spleen
6.11958e-11	1.09947	0.761	0.352	1.49489e-06	Tecr	N0	Up	Spleen
8.00897e-11	2.32216	0.484	0.132	1.95643e-06	Plcl2	N0	Up	Spleen
1.48383e-10	1.34	0.666	0.33	3.6247e-06	Ppp1r12a	N0	Up	Spleen
1.68233e-10	1.93158	0.529	0.165	4.1096e-06	Sap30	N0	Up	Spleen
2.25096e-10	2.15564	0.498	0.132	5.49864e-06	Zfand3	N0	Up	Spleen
2.8616e-10	2.07858	0.474	0.132	6.99033e-06	Gng12	N0	Up	Spleen
3.42192e-10	1.58761	0.575	0.198	8.35907e-06	Degs1	N0	Up	Spleen
5.01331e-10	1.30407	0.549	0.154	1.22465e-05	Ptpre	N0	Up	Spleen
5.47012e-10	1.45761	0.59	0.242	1.33624e-05	E2f8	N0	Up	Spleen
9.47137e-10	1.64252	0.571	0.242	2.31367e-05	Phf20l1	N0	Up	Spleen
1.18875e-09	1.37419	0.562	0.176	2.90389e-05	Rgcc	N0	Up	Spleen
1.37246e-09	2.23252	0.44	0.121	3.35264e-05	Map3k5	N0	Up	Spleen
1.56758e-09	1.55994	0.55	0.187	3.82928e-05	Runx1	N0	Up	Spleen
1.896e-09	1.01451	0.783	0.44	4.63154e-05	Lamtor2	N0	Up	Spleen
2.22392e-09	1.96402	0.461	0.11	5.43259e-05	Glipr2	N0	Up	Spleen
2.23258e-09	1.92941	0.496	0.165	5.45376e-05	Kansl1	N0	Up	Spleen
2.71823e-09	1.45081	0.578	0.231	6.6401e-05	Lasp1	N0	Up	Spleen
2.75545e-09	1.78207	0.477	0.154	6.73101e-05	Hck	N0	Up	Spleen
2.87052e-09	1.89331	0.475	0.143	7.0121e-05	Agps	N0	Up	Spleen
3.13112e-09	1.60927	0.545	0.209	7.64869e-05	Stag1	N0	Up	Spleen
4.30103e-09	1.24379	0.633	0.275	0.000105066	Ncf2	N0	Up	Spleen
4.33359e-09	2.01938	0.446	0.132	0.000105861	Rasa2	N0	Up	Spleen
4.55955e-09	2.01858	0.444	0.11	0.000111381	Flot2	N0	Up	Spleen
4.61775e-09	2.06426	0.465	0.132	0.000112802	Fbxl5	N0	Up	Spleen
4.64218e-09	2.14793	0.437	0.165	0.000113399	Gm2000	N0	Up	Spleen
5.23386e-09	1.70091	0.49	0.143	0.000127853	Ctsd	N0	Up	Spleen
6.91364e-09	1.15155	0.624	0.286	0.000168886	Apbb1ip	N0	Up	Spleen
9.7712e-09	1.69585	0.503	0.165	0.000238691	Klf6	N0	Up	Spleen
1.60053e-08	1.91175	0.445	0.143	0.000390977	Fnip1	N0	Up	Spleen
2.09239e-08	1.83611	0.451	0.121	0.000511128	Hacd2	N0	Up	Spleen
2.84284e-08	2.05391	0.413	0.121	0.00069445	Micu1	N0	Up	Spleen
1.1517e-07	1.90046	0.4	0.121	0.00281336	Diaph1	N0	Up	Spleen
1.1538e-07	1.47368	0.506	0.242	0.0028185	Txnip	N0	Up	Spleen
1.1728e-07	1.75412	0.398	0.11	0.00286491	Myo5a	N0	Up	Spleen
1.37204e-07	1.12019	0.576	0.297	0.00335162	Nudt4	N0	Up	Spleen
1.60156e-07	1.93859	0.394	0.121	0.00391228	Rnpep	N0	Up	Spleen
1.76896e-07	1.2108	0.576	0.286	0.00432122	Atxn10	N0	Up	Spleen
1.91906e-07	1.43595	0.496	0.209	0.00468787	Riok3	N0	Up	Spleen
3.33416e-07	1.84767	0.418	0.154	0.00814468	Nedd9	N0	Up	Spleen
4.61574e-07	1.46794	0.464	0.176	0.0112753	Arhgap19	N0	Up	Spleen
1.00736e-06	1.88238	0.403	0.165	0.0246077	Diaph3	N0	Up	Spleen
1.23488e-06	1.02335	0.658	0.352	0.0301657	Kif15	N0	Up	Spleen
1.34636e-06	1.86639	0.36	0.11	0.0328889	Ralgapa1	N0	Up	Spleen
1.70993e-06	1.61416	0.393	0.154	0.04177	Ugp2	N0	Up	Spleen
1.72587e-06	1.42344	0.418	0.165	0.0421597	Pitpnc1	N0	Up	Spleen
1.7604e-06	1.21561	0.56	0.242	0.0430031	Atg3	N0	Up	Spleen
9.71489e-14	3.54025	0.819	0.156	2.37315e-09	Mctp1	N1	Up	Spleen
1.26515e-14	3.45753	0.878	0.156	3.09051e-10	Abca13	N1	Up	Spleen
2.19747e-15	3.42829	0.898	0.219	5.36799e-11	Arhgap15	N1	Up	Spleen
2.96571e-10	3.06418	0.709	0.156	7.24463e-06	Mcu	N1	Up	Spleen
1.92896e-14	2.89501	0.911	0.281	4.71207e-10	Pag1	N1	Up	Spleen
9.03678e-07	2.68016	0.561	0.125	0.022075	Abcd2	N1	Up	Spleen
2.25707e-09	2.6728	0.727	0.156	5.51357e-05	Mtmr3	N1	Up	Spleen
2.13155e-08	2.65491	0.718	0.188	0.000520695	Dennd4a	N1	Up	Spleen
1.48409e-13	2.62229	0.895	0.344	3.62532e-09	Ikzf1	N1	Up	Spleen
7.19796e-08	2.59704	0.691	0.25	0.00175832	Fbxl5	N1	Up	Spleen
2.16212e-09	2.58037	0.768	0.188	5.28162e-05	Txnip	N1	Up	Spleen
4.13034e-07	2.55252	0.63	0.125	0.0100896	Cers6	N1	Up	Spleen
3.1128e-11	2.52613	0.84	0.281	7.60394e-07	Samsn1	N1	Up	Spleen
4.57277e-08	2.50673	0.705	0.25	0.00111704	Antxr2	N1	Up	Spleen
6.07284e-09	2.45592	0.71	0.25	0.000148347	Nedd9	N1	Up	Spleen
1.02449e-15	2.44279	0.972	0.438	2.50262e-11	Ripor2	N1	Up	Spleen
8.66434e-07	2.38154	0.629	0.188	0.0211652	Gnaq	N1	Up	Spleen
7.95911e-07	2.33243	0.661	0.188	0.0194425	Plcl2	N1	Up	Spleen
1.11902e-07	2.29791	0.723	0.219	0.00273354	Rasa2	N1	Up	Spleen
1.06257e-06	2.24544	0.603	0.156	0.0259565	Rlf	N1	Up	Spleen
5.61995e-07	2.139	0.684	0.188	0.0137284	Dock2	N1	Up	Spleen
2.49304e-09	2.10787	0.8	0.25	6.09e-05	Baz2b	N1	Up	Spleen
4.46032e-10	2.09417	0.845	0.344	1.08957e-05	Ssh2	N1	Up	Spleen
1.04735e-11	2.07661	0.896	0.469	2.55848e-07	Msra	N1	Up	Spleen
2.73771e-09	2.06217	0.783	0.219	6.68767e-05	Rab5if	N1	Up	Spleen
4.55827e-08	2.02159	0.744	0.281	0.00111349	Mir142hg	N1	Up	Spleen
5.76407e-08	1.99106	0.735	0.219	0.00140805	Acpp	N1	Up	Spleen
1.03222e-11	1.97967	0.932	0.469	2.5215e-07	Lyst	N1	Up	Spleen
4.83739e-18	1.92083	0.996	0.812	1.18168e-13	Syne1	N1	Up	Spleen
1.03962e-08	1.84378	0.823	0.344	0.000253959	Megf9	N1	Up	Spleen
1.9503e-10	1.84013	0.925	0.531	4.76418e-06	Pbx1	N1	Up	Spleen
2.2747e-07	1.82812	0.75	0.312	0.00555665	Fgd4	N1	Up	Spleen
4.13089e-08	1.80285	0.836	0.375	0.00100909	Igf1r	N1	Up	Spleen
4.88371e-07	1.79596	0.743	0.312	0.0119299	Elmo1	N1	Up	Spleen
9.65049e-08	1.78462	0.809	0.344	0.00235742	Lyn	N1	Up	Spleen
2.40404e-07	1.63934	0.753	0.25	0.0058726	Ctsd	N1	Up	Spleen
4.60977e-07	1.63483	0.796	0.438	0.0112607	Lrrk2	N1	Up	Spleen
2.28822e-11	1.57193	0.984	0.719	5.58966e-07	F630028O10Rik	N1	Up	Spleen
1.72221e-09	1.43784	0.975	0.5	4.207e-05	Rpl35a	N1	Up	Spleen
4.89034e-09	1.19742	0.976	0.812	0.000119461	Rpl9	N1	Up	Spleen
2.44516e-11	1.00527	0.999	0.906	5.97303e-07	Txn1	N1	Up	Spleen
1.74055e-07	1.00303	0.96	0.812	0.00425183	Tspo	N1	Up	Spleen
1.64871e-93	4.39293	0.9	0.144	4.02746e-89	Antxr2	N2	Up	Spleen
5.35149e-74	4.34019	0.82	0.183	1.30726e-69	Alcam	N2	Up	Spleen
9.35637e-65	4.0348	0.823	0.312	2.28557e-60	Wfdc17	N2	Up	Spleen
1.22593e-53	3.76821	0.703	0.139	2.9947e-49	Trps1	N2	Up	Spleen
4.18737e-54	3.5694	0.699	0.101	1.02289e-49	Spag9	N2	Up	Spleen
2.00003e-99	3.47501	0.963	0.279	4.88568e-95	Arhgap15	N2	Up	Spleen
5.3951e-71	3.3548	0.829	0.163	1.31792e-66	Xylt1	N2	Up	Spleen
3.1557e-43	3.34449	0.632	0.106	7.70874e-39	Fbxo11	N2	Up	Spleen
4.912e-42	3.14481	0.685	0.207	1.1999e-37	Zeb2	N2	Up	Spleen
1.63233e-27	3.10767	0.507	0.12	3.98745e-23	Arhgef3	N2	Up	Spleen
3.12944e-35	3.05057	0.582	0.135	7.64459e-31	Cers6	N2	Up	Spleen
5.17531e-84	3.01387	0.956	0.462	1.26423e-79	Dennd4a	N2	Up	Spleen
2.21717e-32	2.94108	0.55	0.106	5.4161e-28	Mctp1	N2	Up	Spleen
1.48844e-21	2.93247	0.432	0.101	3.63596e-17	Plekhm3	N2	Up	Spleen
3.4979e-34	2.90628	0.571	0.12	8.54466e-30	Lims1	N2	Up	Spleen
1.04227e-47	2.88111	0.705	0.154	2.54606e-43	App	N2	Up	Spleen
1.32849e-56	2.87959	0.843	0.351	3.24524e-52	Wfdc21	N2	Up	Spleen
5.02812e-55	2.80558	0.771	0.197	1.22827e-50	Susd6	N2	Up	Spleen
1.56504e-50	2.79951	0.729	0.178	3.82308e-46	Elmo1	N2	Up	Spleen
4.55779e-42	2.78724	0.797	0.394	1.11338e-37	Lcn2	N2	Up	Spleen
6.70167e-26	2.78324	0.498	0.111	1.63708e-21	Gpr141	N2	Up	Spleen
9.76942e-29	2.76811	0.533	0.135	2.38647e-24	2410006H16Rik	N2	Up	Spleen
1.01395e-27	2.76593	0.533	0.13	2.47688e-23	Hcar2	N2	Up	Spleen
2.89819e-59	2.69919	0.824	0.25	7.07969e-55	Mir142hg	N2	Up	Spleen
8.53174e-33	2.68995	0.574	0.115	2.08413e-28	Ptpn12	N2	Up	Spleen
1.37366e-45	2.68329	0.718	0.202	3.35558e-41	Nedd9	N2	Up	Spleen
7.72546e-47	2.6737	0.713	0.173	1.88718e-42	Usp32	N2	Up	Spleen
1.13937e-26	2.67366	0.507	0.115	2.78325e-22	Chst11	N2	Up	Spleen
1.2028e-36	2.65308	0.637	0.173	2.93819e-32	Erbin	N2	Up	Spleen
1.82853e-19	2.64081	0.415	0.101	4.46673e-15	Tank	N2	Up	Spleen
1.55972e-27	2.63659	0.524	0.12	3.81009e-23	Etv6	N2	Up	Spleen
7.83123e-24	2.6324	0.473	0.111	1.91301e-19	Cdk17	N2	Up	Spleen
2.04806e-24	2.5962	0.479	0.106	5.003e-20	Dock5	N2	Up	Spleen
6.11151e-45	2.58753	0.711	0.197	1.49292e-40	Cmip	N2	Up	Spleen
8.09121e-41	2.5637	0.803	0.524	1.97652e-36	Ifitm1	N2	Up	Spleen
5.17065e-21	2.56349	0.546	0.216	1.26309e-16	Dhx40	N2	Up	Spleen
1.39328e-45	2.45495	0.741	0.24	3.40351e-41	Baz2b	N2	Up	Spleen
3.02322e-25	2.44902	0.508	0.13	7.38511e-21	Arih1	N2	Up	Spleen
1.5027e-17	2.44692	0.426	0.135	3.6708e-13	Dapp1	N2	Up	Spleen
5.51049e-25	2.44578	0.485	0.101	1.3461e-20	Fnip1	N2	Up	Spleen
1.25855e-41	2.42729	0.734	0.25	3.07438e-37	Kpna4	N2	Up	Spleen
3.60641e-48	2.41465	0.824	0.322	8.80973e-44	Slc7a11	N2	Up	Spleen
2.50581e-26	2.40898	0.519	0.115	6.1212e-22	Pdlim5	N2	Up	Spleen
2.75751e-12	2.3586	0.428	0.212	6.73604e-08	Ifitm6	N2	Up	Spleen
5.26505e-49	2.33694	0.799	0.293	1.28615e-44	Pbx1	N2	Up	Spleen
2.01135e-35	2.32661	0.651	0.173	4.91333e-31	Resf1	N2	Up	Spleen
1.82002e-21	2.32498	0.458	0.106	4.44595e-17	Gnaq	N2	Up	Spleen
1.73834e-84	2.32338	0.982	0.577	4.24642e-80	Ripor2	N2	Up	Spleen
3.04787e-19	2.30083	0.454	0.139	7.44533e-15	Spata13	N2	Up	Spleen
3.00882e-23	2.29737	0.508	0.144	7.34994e-19	Hif1a	N2	Up	Spleen
1.83911e-08	2.28847	0.274	0.106	0.000449259	Sod2	N2	Up	Spleen
6.83701e-22	2.28272	0.458	0.106	1.67015e-17	Ythdf3	N2	Up	Spleen
4.35712e-22	2.27853	0.514	0.173	1.06436e-17	Rel	N2	Up	Spleen
2.61956e-42	2.24925	0.763	0.274	6.39906e-38	Ptk2b	N2	Up	Spleen
7.60297e-10	2.24189	0.293	0.106	1.85725e-05	Gns	N2	Up	Spleen
2.83446e-71	2.23363	0.962	0.49	6.92401e-67	Lyn	N2	Up	Spleen
4.61116e-69	2.23347	0.935	0.471	1.12641e-64	Lyst	N2	Up	Spleen
4.93443e-24	2.223	0.501	0.115	1.20538e-19	Cux1	N2	Up	Spleen
1.3292e-16	2.21264	0.4	0.111	3.24697e-12	Bcl2l11	N2	Up	Spleen
1.2396e-15	2.19601	0.374	0.101	3.0281e-11	Dip2b	N2	Up	Spleen
3.02066e-19	2.19208	0.444	0.12	7.37887e-15	Fgd3	N2	Up	Spleen
4.3024e-23	2.18558	0.498	0.13	1.05099e-18	Rab5if	N2	Up	Spleen
1.20545e-11	2.1833	0.322	0.101	2.94466e-07	Aim2	N2	Up	Spleen
6.18007e-28	2.17108	0.589	0.178	1.50967e-23	Ipcef1	N2	Up	Spleen
1.15019e-12	2.14924	0.34	0.101	2.80969e-08	Babam2	N2	Up	Spleen
3.23655e-49	2.13523	0.861	0.337	7.90624e-45	Il1r2	N2	Up	Spleen
5.97283e-34	2.11274	0.678	0.236	1.45904e-29	Zfand3	N2	Up	Spleen
5.79536e-14	2.10394	0.376	0.12	1.41569e-09	Jak2	N2	Up	Spleen
4.33088e-43	2.09936	0.784	0.279	1.05795e-38	Nfe2l2	N2	Up	Spleen
5.8505e-43	2.09911	0.804	0.308	1.42916e-38	Clec4e	N2	Up	Spleen
2.58689e-32	2.09709	0.633	0.154	6.31927e-28	Sgms2	N2	Up	Spleen
3.81569e-24	2.09581	0.549	0.173	9.32096e-20	Camk1d	N2	Up	Spleen
3.51988e-22	2.09496	0.542	0.192	8.59835e-18	Asap1	N2	Up	Spleen
6.60517e-19	2.09145	0.486	0.183	1.61351e-14	Msra	N2	Up	Spleen
7.13855e-19	2.08331	0.454	0.135	1.7438e-14	Fpr1	N2	Up	Spleen
1.44236e-41	2.06877	0.784	0.322	3.5234e-37	Samsn1	N2	Up	Spleen
1.92759e-30	2.06427	0.66	0.245	4.70873e-26	Sema4d	N2	Up	Spleen
1.03937e-44	2.03788	0.785	0.327	2.53896e-40	Pag1	N2	Up	Spleen
4.21091e-17	2.03656	0.414	0.111	1.02864e-12	Atp8b4	N2	Up	Spleen
1.33216e-18	2.03102	0.459	0.139	3.25419e-14	Kansl1	N2	Up	Spleen
3.53823e-32	2.02724	0.674	0.255	8.64319e-28	Inpp5d	N2	Up	Spleen
2.98276e-34	2.02603	0.709	0.274	7.28629e-30	Nfkbiz	N2	Up	Spleen
2.52175e-13	2.00839	0.378	0.13	6.16012e-09	Tet2	N2	Up	Spleen
1.07638e-17	1.97616	0.406	0.101	2.62939e-13	Mtmr3	N2	Up	Spleen
3.67013e-17	1.97035	0.419	0.115	8.96538e-13	Plk3	N2	Up	Spleen
7.65106e-23	1.96232	0.54	0.173	1.869e-18	Ifnar2	N2	Up	Spleen
4.03065e-11	1.94922	0.324	0.106	9.84606e-07	Cdk13	N2	Up	Spleen
1.47922e-18	1.93513	0.499	0.202	3.61344e-14	Chd2	N2	Up	Spleen
4.14375e-16	1.93017	0.449	0.154	1.01224e-11	Runx1	N2	Up	Spleen
3.68753e-34	1.91839	0.746	0.337	9.00789e-30	Entpd1	N2	Up	Spleen
6.59936e-15	1.90331	0.39	0.115	1.61209e-10	Pan3	N2	Up	Spleen
5.58241e-54	1.90002	0.895	0.457	1.36367e-49	Dock2	N2	Up	Spleen
8.91339e-08	1.89021	0.323	0.168	0.00217736	Malt1	N2	Up	Spleen
1.08072e-12	1.88923	0.346	0.106	2.63997e-08	Gk	N2	Up	Spleen
1.75722e-30	1.87904	0.683	0.24	4.29254e-26	Rab8b	N2	Up	Spleen
3.34656e-40	1.87793	0.782	0.317	8.17497e-36	Lilrb4a	N2	Up	Spleen
1.25631e-35	1.86361	0.852	0.668	3.06892e-31	Nfkbia	N2	Up	Spleen
1.95251e-18	1.85935	0.457	0.135	4.7696e-14	Ube2h	N2	Up	Spleen
4.54313e-17	1.82658	0.515	0.212	1.1098e-12	Asprv1	N2	Up	Spleen
4.36701e-21	1.81998	0.55	0.192	1.06677e-16	Dleu2	N2	Up	Spleen
4.39919e-16	1.81721	0.41	0.115	1.07463e-11	Slc16a6	N2	Up	Spleen
4.38893e-24	1.81337	0.538	0.13	1.07213e-19	Cass4	N2	Up	Spleen
4.31992e-10	1.80937	0.303	0.101	1.05527e-05	Atp6v0a1	N2	Up	Spleen
8.63798e-16	1.80809	0.444	0.154	2.11009e-11	Rnf19b	N2	Up	Spleen
3.36943e-17	1.80512	0.588	0.337	8.23083e-13	Wnk1	N2	Up	Spleen
6.33498e-13	1.79728	0.377	0.13	1.54751e-08	Ankhd1	N2	Up	Spleen
4.04386e-20	1.78989	0.57	0.24	9.87834e-16	Birc3	N2	Up	Spleen
8.00252e-16	1.78955	0.418	0.12	1.95486e-11	Fry	N2	Up	Spleen
1.15186e-13	1.78864	0.398	0.139	2.81376e-09	Uvrag	N2	Up	Spleen
8.3761e-12	1.78741	0.337	0.106	2.04611e-07	Wwp2	N2	Up	Spleen
7.86909e-09	1.78525	0.286	0.106	0.000192226	Dyrk1a	N2	Up	Spleen
1.73097e-19	1.77801	0.498	0.159	4.22841e-15	Rlf	N2	Up	Spleen
3.14964e-15	1.77311	0.419	0.139	7.69395e-11	Trip12	N2	Up	Spleen
9.4667e-24	1.77139	0.617	0.26	2.31253e-19	Slc12a6	N2	Up	Spleen
7.168e-12	1.76877	0.397	0.168	1.751e-07	Ankrd17	N2	Up	Spleen
6.60726e-23	1.75365	0.557	0.188	1.61402e-18	Tut7	N2	Up	Spleen
1.25133e-51	1.74974	0.994	0.938	3.05676e-47	S100a8	N2	Up	Spleen
1.91547e-23	1.73758	0.588	0.216	4.6791e-19	Mapkapk2	N2	Up	Spleen
1.04248e-19	1.72562	0.551	0.207	2.54657e-15	Nlrp3	N2	Up	Spleen
4.11326e-15	1.72431	0.435	0.144	1.00479e-10	Cyld	N2	Up	Spleen
3.41346e-28	1.72362	0.678	0.26	8.3384e-24	Plaur	N2	Up	Spleen
7.77368e-20	1.71633	0.579	0.245	1.89895e-15	Mbnl2	N2	Up	Spleen
1.35626e-08	1.71097	0.38	0.212	0.000331307	Dock10	N2	Up	Spleen
1.40977e-18	1.7051	0.471	0.139	3.44379e-14	St3gal5	N2	Up	Spleen
8.75313e-40	1.70377	0.801	0.317	2.13822e-35	Lrg1	N2	Up	Spleen
1.84503e-12	1.70369	0.363	0.115	4.50703e-08	Cyth1	N2	Up	Spleen
5.53432e-14	1.69726	0.429	0.163	1.35192e-09	Clint1	N2	Up	Spleen
6.00914e-16	1.69456	0.446	0.159	1.46791e-11	Hdac4	N2	Up	Spleen
1.97916e-25	1.69382	0.761	0.447	4.83469e-21	Atp2b1	N2	Up	Spleen
9.31502e-12	1.68968	0.385	0.168	2.27547e-07	Rps27rt	N2	Up	Spleen
1.05294e-21	1.6873	0.551	0.202	2.57213e-17	Notch2	N2	Up	Spleen
2.84009e-28	1.68116	0.708	0.317	6.93776e-24	Retreg1	N2	Up	Spleen
1.06286e-13	1.67106	0.427	0.168	2.59636e-09	Zfp608	N2	Up	Spleen
1.13226e-10	1.66492	0.328	0.115	2.76588e-06	Lrrfip2	N2	Up	Spleen
6.58859e-49	1.66164	0.975	0.683	1.60946e-44	Cd44	N2	Up	Spleen
5.604e-30	1.66028	0.744	0.317	1.36895e-25	Pde4b	N2	Up	Spleen
2.4961e-55	1.65778	0.996	0.933	6.09746e-51	S100a9	N2	Up	Spleen
2.32303e-31	1.6577	0.696	0.24	5.67469e-27	Ptafr	N2	Up	Spleen
2.28758e-10	1.64838	0.322	0.111	5.58809e-06	Atp6v1a	N2	Up	Spleen
1.04307e-26	1.64806	0.685	0.317	2.54801e-22	Itgam	N2	Up	Spleen
1.19424e-41	1.64438	0.904	0.495	2.9173e-37	Picalm	N2	Up	Spleen
8.6056e-09	1.63927	0.285	0.101	0.000210218	Ncoa2	N2	Up	Spleen
2.6659e-09	1.63296	0.433	0.236	6.51227e-05	Mmp8	N2	Up	Spleen
1.02883e-31	1.6199	0.697	0.231	2.51323e-27	Trem1	N2	Up	Spleen
6.93203e-14	1.6174	0.427	0.154	1.69336e-09	Pias1	N2	Up	Spleen
4.20004e-18	1.61241	0.498	0.168	1.02599e-13	Arid4b	N2	Up	Spleen
2.99094e-31	1.6066	0.932	0.721	7.30626e-27	Retnlg	N2	Up	Spleen
5.56421e-13	1.60538	0.42	0.159	1.35923e-08	Tmem164	N2	Up	Spleen
5.99804e-25	1.59323	0.657	0.264	1.4652e-20	Ets2	N2	Up	Spleen
7.33873e-13	1.5899	0.362	0.115	1.79271e-08	Oga	N2	Up	Spleen
5.3872e-20	1.58338	0.572	0.24	1.31598e-15	Map3k5	N2	Up	Spleen
2.36598e-08	1.58285	0.296	0.12	0.000577962	Tiparp	N2	Up	Spleen
7.71597e-13	1.57037	0.411	0.168	1.88486e-08	Atp5md	N2	Up	Spleen
1.79156e-13	1.56577	0.434	0.163	4.37643e-09	Znrf1	N2	Up	Spleen
3.61453e-13	1.56548	0.397	0.135	8.82957e-09	Etf1	N2	Up	Spleen
9.73256e-12	1.56426	0.38	0.139	2.37747e-07	Fem1c	N2	Up	Spleen
1.06519e-11	1.55597	0.353	0.115	2.60205e-07	Evi2a	N2	Up	Spleen
8.88864e-11	1.54667	0.341	0.12	2.17132e-06	Atxn10	N2	Up	Spleen
3.97797e-21	1.54323	0.576	0.197	9.71739e-17	Cyfip2	N2	Up	Spleen
7.72136e-26	1.5414	0.708	0.38	1.88617e-21	Ankrd44	N2	Up	Spleen
3.65083e-11	1.53903	0.385	0.154	8.91824e-07	Tmem131l	N2	Up	Spleen
3.32678e-11	1.53424	0.371	0.139	8.12667e-07	Med13	N2	Up	Spleen
7.08431e-12	1.52888	0.354	0.106	1.73056e-07	Klra2	N2	Up	Spleen
1.98848e-12	1.50905	0.392	0.135	4.85745e-08	Il15	N2	Up	Spleen
1.71308e-14	1.5042	0.473	0.188	4.18471e-10	St3gal6	N2	Up	Spleen
8.09613e-10	1.50289	0.335	0.13	1.97772e-05	Herc1	N2	Up	Spleen
4.74485e-14	1.49643	0.452	0.178	1.15907e-09	Phf21a	N2	Up	Spleen
3.49994e-30	1.49525	0.855	0.447	8.54965e-26	Plek	N2	Up	Spleen
4.48826e-26	1.49412	0.718	0.327	1.09639e-21	Lpcat2	N2	Up	Spleen
1.41137e-34	1.49333	0.817	0.442	3.4477e-30	Tspo	N2	Up	Spleen
1.06739e-06	1.49248	0.245	0.101	0.0260743	Ncoa1	N2	Up	Spleen
7.38292e-10	1.49123	0.363	0.159	1.8035e-05	Dstn	N2	Up	Spleen
1.15598e-13	1.49074	0.45	0.183	2.82383e-09	Mef2a	N2	Up	Spleen
2.93997e-28	1.48849	0.746	0.341	7.18175e-24	Skap2	N2	Up	Spleen
1.01931e-10	1.48765	0.352	0.13	2.48998e-06	Cop1	N2	Up	Spleen
1.0361e-11	1.48328	0.388	0.149	2.53099e-07	Larp4b	N2	Up	Spleen
2.11325e-10	1.48005	0.346	0.13	5.16224e-06	Wdfy4	N2	Up	Spleen
6.74637e-07	1.47741	0.258	0.106	0.01648	Zc3h12a	N2	Up	Spleen
5.60794e-10	1.47285	0.302	0.101	1.36991e-05	Mirt2	N2	Up	Spleen
6.10832e-23	1.46115	0.696	0.351	1.49214e-18	Igf1r	N2	Up	Spleen
2.31227e-11	1.46055	0.406	0.173	5.64842e-07	Kmt2c	N2	Up	Spleen
6.12138e-15	1.45422	0.42	0.125	1.49533e-10	Klf7	N2	Up	Spleen
1.88985e-11	1.44722	0.4	0.159	4.61654e-07	Arfgef1	N2	Up	Spleen
4.35499e-13	1.43614	0.452	0.188	1.06384e-08	Chd7	N2	Up	Spleen
1.09036e-06	1.43312	0.282	0.135	0.0266354	St3gal1	N2	Up	Spleen
2.03659e-14	1.42852	0.482	0.202	4.97498e-10	Il1rap	N2	Up	Spleen
4.50494e-14	1.42746	0.442	0.168	1.10047e-09	Stx11	N2	Up	Spleen
4.73198e-20	1.42636	0.591	0.24	1.15593e-15	Trib1	N2	Up	Spleen
3.19505e-09	1.41977	0.409	0.197	7.80488e-05	G0s2	N2	Up	Spleen
1.98019e-10	1.41196	0.339	0.125	4.83721e-06	Tacstd2	N2	Up	Spleen
6.30562e-13	1.40888	0.456	0.197	1.54034e-08	Fli1	N2	Up	Spleen
3.89352e-07	1.40726	0.277	0.115	0.00951109	Map4k4	N2	Up	Spleen
1.5317e-08	1.40592	0.316	0.13	0.000374164	AA467197	N2	Up	Spleen
7.94399e-33	1.40556	0.844	0.438	1.94056e-28	Lmnb1	N2	Up	Spleen
2.93355e-12	1.40251	0.421	0.173	7.16607e-08	Klhl2	N2	Up	Spleen
5.41568e-08	1.39645	0.309	0.125	0.00132294	Cybb	N2	Up	Spleen
7.00108e-17	1.37769	0.577	0.293	1.71022e-12	Rapgef6	N2	Up	Spleen
9.82176e-09	1.37197	0.295	0.106	0.000239926	Cd80	N2	Up	Spleen
8.67035e-07	1.36919	0.258	0.106	0.0211799	Fam13b	N2	Up	Spleen
1.30946e-15	1.3657	0.418	0.115	3.19876e-11	Clec5a	N2	Up	Spleen
3.6955e-20	1.36182	0.678	0.356	9.02736e-16	Prkcb	N2	Up	Spleen
3.70328e-12	1.34898	0.38	0.125	9.04637e-08	Sp140	N2	Up	Spleen
1.32503e-09	1.34758	0.371	0.163	3.23678e-05	Atg7	N2	Up	Spleen
1.142e-08	1.34607	0.382	0.188	0.000278968	Snx10	N2	Up	Spleen
1.05481e-10	1.34297	0.347	0.12	2.57669e-06	Ankrd33b	N2	Up	Spleen
3.77439e-10	1.33896	0.329	0.12	9.22009e-06	Fabp5	N2	Up	Spleen
2.22825e-14	1.33588	0.533	0.245	5.44316e-10	Hck	N2	Up	Spleen
2.46911e-22	1.32777	0.704	0.365	6.03154e-18	Sirpb1b	N2	Up	Spleen
5.28052e-15	1.32753	0.537	0.245	1.28992e-10	Abi1	N2	Up	Spleen
4.03662e-13	1.32212	0.501	0.231	9.86065e-09	Iqsec1	N2	Up	Spleen
3.55936e-39	1.31063	0.981	0.841	8.69481e-35	Cebpb	N2	Up	Spleen
2.73077e-15	1.29847	0.569	0.288	6.67074e-11	Lgals3	N2	Up	Spleen
1.65493e-21	1.29352	0.728	0.423	4.04266e-17	Anxa1	N2	Up	Spleen
6.14912e-15	1.29284	0.574	0.284	1.50211e-10	Lamp2	N2	Up	Spleen
1.14419e-09	1.28802	0.365	0.149	2.79502e-05	Fgd4	N2	Up	Spleen
6.02459e-13	1.28266	0.457	0.183	1.47169e-08	Pnpla7	N2	Up	Spleen
2.04569e-12	1.27649	0.421	0.163	4.99722e-08	Rab31	N2	Up	Spleen
6.39347e-17	1.27637	0.593	0.26	1.5618e-12	Igsf6	N2	Up	Spleen
7.82015e-17	1.26903	0.594	0.284	1.91031e-12	Ppp1r12a	N2	Up	Spleen
8.3563e-07	1.25767	0.266	0.106	0.0204128	Sde2	N2	Up	Spleen
3.92457e-07	1.25605	0.319	0.154	0.00958693	Aff4	N2	Up	Spleen
4.35712e-12	1.25522	0.518	0.274	1.06436e-07	Kras	N2	Up	Spleen
2.75397e-11	1.24672	0.408	0.163	6.72739e-07	Mettl9	N2	Up	Spleen
1.28449e-06	1.23834	0.266	0.115	0.0313776	Atg2a	N2	Up	Spleen
9.30436e-19	1.23025	0.656	0.312	2.27287e-14	N4bp1	N2	Up	Spleen
1.03851e-09	1.22781	0.368	0.154	2.53688e-05	Clec4a2	N2	Up	Spleen
1.0622e-23	1.22608	0.762	0.365	2.59474e-19	Pim1	N2	Up	Spleen
2.2233e-10	1.21511	0.337	0.111	5.43108e-06	Pacs1	N2	Up	Spleen
1.17604e-09	1.21037	0.384	0.173	2.87283e-05	Dock11	N2	Up	Spleen
3.30669e-11	1.20977	0.446	0.192	8.07757e-07	Srpk2	N2	Up	Spleen
8.45152e-08	1.20852	0.404	0.231	0.00206454	Ankrd12	N2	Up	Spleen
1.66969e-23	1.20731	0.804	0.505	4.07872e-19	Ddx6	N2	Up	Spleen
1.63806e-06	1.20664	0.275	0.12	0.0400146	Tcf20	N2	Up	Spleen
3.36071e-15	1.20632	0.592	0.298	8.20954e-11	Gm5150	N2	Up	Spleen
6.8585e-08	1.20348	0.304	0.125	0.00167539	Tuba1c	N2	Up	Spleen
6.68484e-12	1.19839	0.49	0.231	1.63297e-07	Sgms1	N2	Up	Spleen
2.81627e-08	1.19728	0.345	0.149	0.000687959	St3gal4	N2	Up	Spleen
1.29035e-13	1.19516	0.585	0.341	3.15206e-09	Tnrc6b	N2	Up	Spleen
7.62372e-11	1.18726	0.382	0.149	1.86232e-06	Smox	N2	Up	Spleen
2.8059e-12	1.18101	0.479	0.216	6.85424e-08	Arhgap25	N2	Up	Spleen
1.79225e-06	1.1781	0.36	0.197	0.043781	Gadd45b	N2	Up	Spleen
1.59979e-10	1.17536	0.431	0.202	3.90797e-06	Tbc1d15	N2	Up	Spleen
4.92999e-09	1.17129	0.419	0.207	0.00012043	Rilpl2	N2	Up	Spleen
4.46218e-07	1.17068	0.3	0.13	0.0109002	Magoh	N2	Up	Spleen
1.27414e-06	1.16822	0.375	0.221	0.0311246	Nfkb1	N2	Up	Spleen
1.98076e-12	1.16647	0.548	0.303	4.8386e-08	Rock1	N2	Up	Spleen
1.23831e-07	1.16045	0.358	0.173	0.00302493	Xpr1	N2	Up	Spleen
5.20032e-13	1.14452	0.512	0.236	1.27033e-08	Dusp6	N2	Up	Spleen
1.39872e-06	1.14374	0.276	0.12	0.034168	Dusp5	N2	Up	Spleen
4.25034e-11	1.13778	0.463	0.212	1.03827e-06	Stfa2l1	N2	Up	Spleen
3.20087e-11	1.13174	0.533	0.288	7.81909e-07	Fbxl5	N2	Up	Spleen
2.89014e-08	1.13115	0.374	0.178	0.000706004	Tbl1xr1	N2	Up	Spleen
5.4957e-10	1.13112	0.388	0.163	1.34249e-05	Per1	N2	Up	Spleen
1.87149e-06	1.13004	0.274	0.12	0.0457167	Azin1	N2	Up	Spleen
1.81958e-15	1.12999	0.63	0.341	4.44486e-11	Ppp3ca	N2	Up	Spleen
7.10155e-08	1.11943	0.376	0.183	0.00173477	Ago2	N2	Up	Spleen
2.84616e-07	1.1119	0.297	0.125	0.00695261	Ppp6r3	N2	Up	Spleen
8.98726e-07	1.11168	0.298	0.135	0.0219541	Map3k3	N2	Up	Spleen
5.23051e-23	1.11097	0.968	0.894	1.27771e-18	S100a6	N2	Up	Spleen
8.09126e-18	1.10921	0.704	0.423	1.97653e-13	Pten	N2	Up	Spleen
1.93765e-15	1.10523	0.591	0.274	4.73328e-11	Ndel1	N2	Up	Spleen
3.895e-32	1.1033	0.997	1	9.5147e-28	H3f3b	N2	Up	Spleen
6.06673e-14	1.10143	0.564	0.274	1.48198e-09	Rab2a	N2	Up	Spleen
1.20893e-06	1.09896	0.278	0.125	0.0295318	Ckap4	N2	Up	Spleen
1.62189e-06	1.09672	0.272	0.115	0.0396195	Mtmr6	N2	Up	Spleen
1.25101e-06	1.09377	0.269	0.111	0.0305597	Rictor	N2	Up	Spleen
1.58106e-08	1.08929	0.412	0.207	0.000386221	Synj1	N2	Up	Spleen
1.57417e-11	1.08554	0.503	0.226	3.84537e-07	Jmjd1c	N2	Up	Spleen
4.20833e-07	1.07662	0.294	0.125	0.0102801	Pram1	N2	Up	Spleen
1.75279e-10	1.07576	0.66	0.462	4.28171e-06	Mbnl1	N2	Up	Spleen
3.14728e-22	1.07547	0.857	0.548	7.68816e-18	Clec4d	N2	Up	Spleen
2.83934e-11	1.07457	0.461	0.202	6.93593e-07	Gm34084	N2	Up	Spleen
2.82327e-14	1.07326	0.449	0.144	6.89669e-10	Cd14	N2	Up	Spleen
8.63997e-21	1.07245	0.92	0.673	2.11057e-16	Cxcr4	N2	Up	Spleen
7.64563e-20	1.07017	0.828	0.529	1.86768e-15	Syk	N2	Up	Spleen
1.50362e-09	1.07003	0.388	0.173	3.67303e-05	Gadd45a	N2	Up	Spleen
1.04557e-07	1.06598	0.36	0.168	0.00255412	Gls	N2	Up	Spleen
1.4347e-06	1.05223	0.321	0.159	0.0350469	Wapl	N2	Up	Spleen
8.30429e-14	1.04932	0.55	0.245	2.02857e-09	Sh2d3c	N2	Up	Spleen
2.89061e-07	1.04444	0.354	0.173	0.00706119	Wasf2	N2	Up	Spleen
3.94624e-10	1.04106	0.458	0.221	9.63987e-06	Prdx6	N2	Up	Spleen
6.29729e-10	1.02481	0.416	0.183	1.5383e-05	Fcho2	N2	Up	Spleen
5.87728e-07	1.0227	0.302	0.13	0.014357	Heca	N2	Up	Spleen
1.78795e-08	1.02074	0.498	0.308	0.00043676	Nsd3	N2	Up	Spleen
6.8806e-07	1.01489	0.395	0.221	0.0168079	Pip4k2a	N2	Up	Spleen
5.81186e-17	1.00666	0.717	0.389	1.41972e-12	Selenok	N2	Up	Spleen
4.92692e-12	1.00607	0.531	0.26	1.20355e-07	Snx18	N2	Up	Spleen
2.2024e-45	1.00421	0.993	0.957	5.38003e-41	S100a11	N2	Up	Spleen
6.57497e-07	1.00336	0.289	0.125	0.0160613	Arf4	N2	Up	Spleen
1.73628e-09	1.00092	0.482	0.25	4.24139e-05	Atp6v1e1	N2	Up	Spleen
5.33612e-81	-3.62987	0.148	0.912	1.30351e-76	Eef1g	N0	Down	Spleen
2.56774e-67	-4.36199	0.113	0.758	6.27248e-63	Cd74	N0	Down	Spleen
3.06399e-64	-3.68891	0.262	0.934	7.48473e-60	mt-Nd2	N0	Down	Spleen
3.41325e-62	-3.28339	0.119	0.736	8.33789e-58	Mrpl52	N0	Down	Spleen
3.0709e-61	-4.07567	0.106	0.714	7.50158e-57	Mif	N0	Down	Spleen
1.94162e-60	-5.07848	0.131	0.736	4.74298e-56	mt-Nd4l	N0	Down	Spleen
2.08985e-59	-3.42928	0.337	0.934	5.10509e-55	Eef2	N0	Down	Spleen
1.58693e-57	-3.11429	0.201	0.846	3.87655e-53	Prdx1	N0	Down	Spleen
1.73345e-56	-3.34612	0.129	0.747	4.23446e-52	Hspe1	N0	Down	Spleen
2.31503e-55	-3.0538	0.2	0.846	5.65515e-51	Psmb8	N0	Down	Spleen
2.17851e-53	-2.96824	0.174	0.824	5.32167e-49	Cnbp	N0	Down	Spleen
1.00888e-51	-2.92112	0.219	0.846	2.4645e-47	mt-Nd5	N0	Down	Spleen
1.5101e-50	-4.33297	0.408	0.978	3.68887e-46	Gm10076	N0	Down	Spleen
3.29247e-50	-3.07767	0.559	0.967	8.04286e-46	Pabpc1	N0	Down	Spleen
1.94799e-49	-3.28565	0.466	0.978	4.75855e-45	Hsp90ab1	N0	Down	Spleen
1.43077e-48	-3.15188	0.662	0.956	3.49508e-44	Rpl13a	N0	Down	Spleen
1.6734e-47	-2.8935	0.571	0.956	4.08779e-43	Rpl4	N0	Down	Spleen
3.51932e-46	-3.05374	0.649	0.956	8.59699e-42	Rpl35	N0	Down	Spleen
8.90383e-45	-2.69016	0.935	0.967	2.17503e-40	Eef1a1	N0	Down	Spleen
2.39414e-44	-2.92249	0.473	0.934	5.8484e-40	mt-Nd1	N0	Down	Spleen
2.98154e-44	-2.97471	0.399	0.934	7.28331e-40	Npm1	N0	Down	Spleen
7.32057e-44	-2.60865	0.239	0.813	1.78827e-39	Psme1	N0	Down	Spleen
2.17286e-43	-2.93065	0.514	0.934	5.30787e-39	Rpl5	N0	Down	Spleen
1.56306e-42	-3.31535	0.223	0.78	3.81824e-38	Nme2	N0	Down	Spleen
2.37376e-42	-2.18385	0.876	0.967	5.79861e-38	Rpl6	N0	Down	Spleen
4.23235e-42	-3.10087	0.11	0.604	1.03388e-37	Apobec3	N0	Down	Spleen
4.76837e-42	-2.39978	0.583	0.956	1.16482e-37	Eef1b2	N0	Down	Spleen
5.02806e-42	-2.5838	0.609	0.956	1.22826e-37	Rpl14	N0	Down	Spleen
6.58376e-42	-2.40499	0.402	0.923	1.60828e-37	Eif3f	N0	Down	Spleen
4.01869e-41	-2.47133	0.664	0.956	9.81685e-37	Rpl10a	N0	Down	Spleen
7.93382e-41	-2.15477	0.81	0.978	1.93807e-36	Hspa8	N0	Down	Spleen
1.02979e-40	-1.87404	0.89	0.967	2.51558e-36	Rpl7	N0	Down	Spleen
1.30707e-40	-2.38184	0.688	0.967	3.19291e-36	Rpl23a	N0	Down	Spleen
2.11662e-40	-2.1653	0.901	0.967	5.17048e-36	Rps5	N0	Down	Spleen
2.67379e-40	-1.86594	0.958	0.967	6.53154e-36	Rpl19	N0	Down	Spleen
2.71904e-40	-1.83941	0.959	0.967	6.64208e-36	Rpl18a	N0	Down	Spleen
2.73153e-40	-2.31781	0.421	0.934	6.67258e-36	Slc25a3	N0	Down	Spleen
3.03054e-40	-1.85065	0.976	0.967	7.403e-36	Rps3a1	N0	Down	Spleen
3.26849e-40	-2.09112	0.921	0.967	7.98428e-36	Rplp0	N0	Down	Spleen
5.12097e-40	-2.80557	0.174	0.714	1.25095e-35	Nop10	N0	Down	Spleen
5.62649e-40	-1.81954	0.99	0.989	1.37444e-35	Rpl28	N0	Down	Spleen
6.42223e-40	-1.91821	0.961	0.956	1.56882e-35	Rps11	N0	Down	Spleen
7.32529e-40	-1.80571	0.954	0.978	1.78942e-35	Rps7	N0	Down	Spleen
8.01283e-40	-1.5802	0.998	0.989	1.95737e-35	Rps16	N0	Down	Spleen
8.84639e-40	-2.34909	0.272	0.846	2.161e-35	Eef1d	N0	Down	Spleen
1.09904e-39	-2.09432	0.934	0.967	2.68473e-35	Rpsa	N0	Down	Spleen
1.3782e-39	-1.94667	0.979	0.978	3.36668e-35	Rps8	N0	Down	Spleen
1.63796e-39	-3.23315	0.106	0.56	4.0012e-35	Pkig	N0	Down	Spleen
1.82249e-39	-1.81634	0.951	0.978	4.45197e-35	Rpl18	N0	Down	Spleen
3.0832e-39	-2.22319	0.39	0.89	7.53163e-35	Hnrnpa1	N0	Down	Spleen
7.0994e-39	-3.088	0.142	0.626	1.73424e-34	Cdk4	N0	Down	Spleen
7.45313e-39	-2.13238	0.757	0.956	1.82065e-34	Rpl3	N0	Down	Spleen
1.56311e-38	-1.50079	0.998	0.989	3.81836e-34	Rps24	N0	Down	Spleen
2.11044e-38	-3.20514	0.628	0.945	5.15538e-34	Tmsb10	N0	Down	Spleen
2.69988e-38	-2.23722	0.829	0.967	6.59527e-34	Rpl29	N0	Down	Spleen
4.62748e-38	-2.5894	0.549	0.934	1.1304e-33	Rpl12	N0	Down	Spleen
6.26304e-38	-1.94787	0.93	0.978	1.52993e-33	Rps4x	N0	Down	Spleen
1.06794e-37	-2.6851	0.106	0.56	2.60876e-33	Trim28	N0	Down	Spleen
3.39351e-37	-1.65565	0.977	0.989	8.28965e-33	Rps20	N0	Down	Spleen
8.57641e-37	-2.02007	0.923	0.967	2.09505e-32	Rps26	N0	Down	Spleen
1.79502e-36	-2.19663	0.784	0.956	4.38487e-32	Rps6	N0	Down	Spleen
1.89498e-36	-1.72691	0.925	0.978	4.62906e-32	Rpl8	N0	Down	Spleen
3.8064e-36	-2.4111	0.743	0.945	9.29828e-32	Rps15	N0	Down	Spleen
4.08096e-36	-1.53778	0.974	0.978	9.96898e-32	Rps3	N0	Down	Spleen
5.77684e-36	-2.3326	0.696	0.934	1.41117e-31	Rack1	N0	Down	Spleen
1.08634e-35	-1.72152	0.976	0.989	2.65371e-31	Rpl13	N0	Down	Spleen
1.66302e-35	-1.6379	0.979	0.967	4.06241e-31	Rps14	N0	Down	Spleen
1.8305e-35	-1.51525	0.875	1	4.47154e-31	Hnrnpa2b1	N0	Down	Spleen
4.55936e-35	-2.53968	0.207	0.692	1.11376e-30	Tcp1	N0	Down	Spleen
5.02106e-35	-3.03758	0.168	0.659	1.22654e-30	Cd37	N0	Down	Spleen
6.79089e-35	-1.64765	0.946	0.967	1.65888e-30	Rps19	N0	Down	Spleen
1.06417e-34	-1.65335	0.935	0.967	2.59956e-30	Rpl24	N0	Down	Spleen
2.53925e-34	-1.76839	0.883	0.967	6.20287e-30	Rpl15	N0	Down	Spleen
5.58513e-34	-1.67135	0.967	0.967	1.36433e-29	Rpl11	N0	Down	Spleen
8.27791e-34	-2.15304	0.314	0.813	2.02213e-29	Arhgdia	N0	Down	Spleen
9.42035e-34	-1.99022	0.828	0.967	2.3012e-29	Rplp1	N0	Down	Spleen
1.12687e-33	-2.44147	0.252	0.747	2.75272e-29	Zfp706	N0	Down	Spleen
6.79454e-33	-5.08908	0.126	0.538	1.65977e-28	Rpl10-ps3	N0	Down	Spleen
8.18728e-33	-1.52272	0.958	0.967	1.99999e-28	Rpl30	N0	Down	Spleen
8.26922e-33	-1.74456	0.997	0.989	2.02001e-28	mt-Co3	N0	Down	Spleen
1.02627e-32	-1.66459	0.997	0.989	2.50697e-28	mt-Co1	N0	Down	Spleen
1.78836e-32	-1.8795	0.833	0.945	4.36859e-28	Rpl7a	N0	Down	Spleen
2.08084e-32	-1.95222	0.842	0.945	5.08308e-28	Rpl36	N0	Down	Spleen
2.36764e-32	-1.67641	0.767	0.956	5.78366e-28	Rpl22	N0	Down	Spleen
2.41145e-32	-1.07484	1	1	5.8907e-28	Tpt1	N0	Down	Spleen
3.31321e-32	-2.68822	0.105	0.516	8.0935e-28	Trp53	N0	Down	Spleen
5.49242e-32	-1.718	0.98	0.967	1.34169e-27	Rpl32	N0	Down	Spleen
9.11144e-32	-2.35974	0.132	0.571	2.22574e-27	Eif3l	N0	Down	Spleen
1.17378e-31	-2.72491	0.178	0.626	2.8673e-27	Pa2g4	N0	Down	Spleen
1.5718e-31	-1.91931	0.672	0.945	3.8396e-27	Rpl36a	N0	Down	Spleen
2.38145e-31	-1.47293	0.994	0.967	5.8174e-27	Rpl37	N0	Down	Spleen
2.39217e-31	-2.88973	0.104	0.505	5.84359e-27	Dctpp1	N0	Down	Spleen
2.82728e-31	-1.25352	0.995	0.967	6.90649e-27	Rpl34	N0	Down	Spleen
2.87394e-31	-1.81998	0.863	0.967	7.02047e-27	mt-Cytb	N0	Down	Spleen
5.74261e-31	-2.48651	0.197	0.648	1.4028e-26	Cct5	N0	Down	Spleen
8.71257e-31	-1.59545	0.952	0.956	2.12831e-26	Rpl26	N0	Down	Spleen
1.01116e-30	-5.11732	0.169	0.582	2.47006e-26	Rpl9-ps6	N0	Down	Spleen
1.36211e-30	-1.59269	0.86	0.967	3.32737e-26	Naca	N0	Down	Spleen
2.1833e-30	-1.50669	0.994	0.989	5.33336e-26	mt-Co2	N0	Down	Spleen
3.09044e-30	-1.494	0.967	0.967	7.54933e-26	Rps27	N0	Down	Spleen
3.17993e-30	-1.28709	0.99	0.978	7.76793e-26	Rpl23	N0	Down	Spleen
4.30482e-30	-2.75444	0.121	0.527	1.05158e-25	Tcf3	N0	Down	Spleen
4.32576e-30	-1.73094	0.726	1	1.0567e-25	Atp5g2	N0	Down	Spleen
4.55363e-30	-2.54272	0.161	0.615	1.11236e-25	Mdh1	N0	Down	Spleen
5.06756e-30	-1.08707	0.998	1	1.2379e-25	Rps9	N0	Down	Spleen
5.52427e-30	-1.64063	0.922	0.967	1.34947e-25	Rpl21	N0	Down	Spleen
5.67597e-30	-1.44046	0.943	0.967	1.38653e-25	Rpl39	N0	Down	Spleen
7.25877e-30	-1.9089	0.842	0.967	1.77317e-25	Rps2	N0	Down	Spleen
7.66173e-30	-1.72438	0.956	0.978	1.87161e-25	Rps12	N0	Down	Spleen
2.97046e-29	-2.30633	0.577	0.923	7.25623e-25	Ucp2	N0	Down	Spleen
3.71314e-29	-1.59419	0.945	0.945	9.07046e-25	Rpl27a	N0	Down	Spleen
7.40075e-29	-1.24249	0.991	0.989	1.80786e-24	Rps10	N0	Down	Spleen
7.69608e-29	-1.30217	0.989	0.967	1.88e-24	Rps13	N0	Down	Spleen
9.95244e-29	-2.56132	0.453	0.824	2.43118e-24	H2-K1	N0	Down	Spleen
1.02321e-28	-1.62076	0.506	0.912	2.49951e-24	Atp5a1	N0	Down	Spleen
1.30037e-28	-2.43692	0.352	0.791	3.17654e-24	Ncl	N0	Down	Spleen
3.43601e-28	-2.35605	0.149	0.571	8.39348e-24	Akr1a1	N0	Down	Spleen
4.92188e-28	-2.33002	0.174	0.604	1.20232e-23	Rtraf	N0	Down	Spleen
5.12404e-28	-1.41086	0.975	1	1.2517e-23	Rplp2	N0	Down	Spleen
5.8725e-28	-2.05566	0.212	0.681	1.43453e-23	Eif3i	N0	Down	Spleen
1.96504e-27	-1.34349	0.736	0.967	4.8002e-23	Uqcrh	N0	Down	Spleen
2.03151e-27	-1.46008	0.953	0.967	4.96258e-23	Rps23	N0	Down	Spleen
2.16105e-27	-2.17731	0.334	0.758	5.27902e-23	Selenoh	N0	Down	Spleen
4.2508e-27	-2.11442	0.23	0.681	1.03839e-22	Emg1	N0	Down	Spleen
5.34603e-27	-2.47513	0.187	0.615	1.30593e-22	Arpc5l	N0	Down	Spleen
7.26854e-27	-1.33904	0.93	0.967	1.77556e-22	Rps21	N0	Down	Spleen
7.28524e-27	-1.67481	0.845	0.967	1.77964e-22	Ybx1	N0	Down	Spleen
7.54037e-27	-2.07282	0.353	0.802	1.84196e-22	Gdi2	N0	Down	Spleen
9.1845e-27	-1.47934	0.922	0.956	2.24359e-22	Rps28	N0	Down	Spleen
1.13261e-26	-1.60606	0.547	0.912	2.76675e-22	Atp5b	N0	Down	Spleen
1.22605e-26	-2.30627	0.2	0.626	2.99499e-22	Phb2	N0	Down	Spleen
1.40893e-26	-1.90953	0.509	0.879	3.44174e-22	Slc25a5	N0	Down	Spleen
1.93157e-26	-2.11131	0.28	0.725	4.71843e-22	Trmt112	N0	Down	Spleen
2.69778e-26	-1.08537	0.993	0.967	6.59015e-22	Rps15a	N0	Down	Spleen
5.18331e-26	-1.79481	0.679	0.901	1.26618e-21	Rpl31	N0	Down	Spleen
5.65257e-26	-2.79515	0.241	0.681	1.38081e-21	Psap	N0	Down	Spleen
6.81714e-26	-2.09499	0.233	0.692	1.66529e-21	Eif3e	N0	Down	Spleen
1.96078e-25	-2.32797	0.117	0.495	4.78979e-21	Nudcd2	N0	Down	Spleen
3.249e-25	-1.12839	0.984	0.956	7.93665e-21	Rpl27	N0	Down	Spleen
3.81233e-25	-1.96399	0.239	0.659	9.31275e-21	Ptbp1	N0	Down	Spleen
4.14352e-25	-1.6653	0.525	0.857	1.01218e-20	Eif3h	N0	Down	Spleen
6.57043e-25	-2.55299	0.142	0.527	1.60502e-20	Mrpl42	N0	Down	Spleen
6.81022e-25	-2.37107	0.12	0.505	1.6636e-20	Uqcc2	N0	Down	Spleen
7.4566e-25	-1.10786	0.998	1	1.8215e-20	Ppia	N0	Down	Spleen
7.97662e-25	-2.02425	0.64	0.89	1.94853e-20	Rpl10	N0	Down	Spleen
8.242e-25	-3.14447	0.121	0.484	2.01336e-20	Hspd1	N0	Down	Spleen
3.70712e-24	-2.34254	0.2	0.604	9.05575e-20	Psme2	N0	Down	Spleen
4.43727e-24	-2.66337	0.105	0.451	1.08394e-19	Snx2	N0	Down	Spleen
5.38179e-24	-1.49338	0.854	0.956	1.31466e-19	Rps17	N0	Down	Spleen
5.53465e-24	-2.11141	0.168	0.571	1.352e-19	Fundc2	N0	Down	Spleen
1.47454e-23	-1.27417	0.825	0.956	3.60201e-19	Rpl36al	N0	Down	Spleen
1.53023e-23	-1.62483	0.659	0.934	3.73804e-19	Serbp1	N0	Down	Spleen
4.62419e-23	-2.16668	0.157	0.56	1.1296e-18	Calr	N0	Down	Spleen
5.97871e-23	-2.52142	0.138	0.495	1.46048e-18	Fkbp3	N0	Down	Spleen
7.46809e-23	-2.23315	0.187	0.571	1.82431e-18	Cbx1	N0	Down	Spleen
1.33778e-22	-1.16384	1	0.967	3.26794e-18	Rpl37a	N0	Down	Spleen
1.9863e-22	-2.1972	0.122	0.473	4.85213e-18	Eif3b	N0	Down	Spleen
2.0136e-22	-1.39825	0.959	0.978	4.91882e-18	Tubb5	N0	Down	Spleen
2.56613e-22	-1.60314	0.727	0.923	6.26855e-18	Rpl22l1	N0	Down	Spleen
3.43297e-22	-1.6226	0.529	0.868	8.38606e-18	Atp5d	N0	Down	Spleen
9.63164e-22	-1.4708	0.553	0.89	2.35282e-17	Snrpf	N0	Down	Spleen
1.03341e-21	-1.60366	0.372	0.769	2.52442e-17	Ndufa7	N0	Down	Spleen
1.06036e-21	-2.27351	0.22	0.604	2.59025e-17	Vcp	N0	Down	Spleen
1.13431e-21	-2.1355	0.238	0.615	2.77089e-17	Cct2	N0	Down	Spleen
1.27025e-21	-1.63668	0.389	0.802	3.10297e-17	Srrm2	N0	Down	Spleen
1.9447e-21	-1.27149	0.92	0.945	4.7505e-17	Rps18	N0	Down	Spleen
2.00008e-21	-1.75834	0.226	0.626	4.88579e-17	Eif3m	N0	Down	Spleen
2.82868e-21	-2.10332	0.136	0.495	6.9099e-17	Ube2v1	N0	Down	Spleen
2.87207e-21	-2.03962	0.628	0.868	7.01589e-17	Atp5g3	N0	Down	Spleen
4.02822e-21	-2.52654	0.129	0.473	9.84013e-17	Eif4b	N0	Down	Spleen
4.48105e-21	-1.80093	0.321	0.714	1.09463e-16	Nol7	N0	Down	Spleen
7.11986e-21	-1.60414	0.69	0.923	1.73924e-16	Hsp90aa1	N0	Down	Spleen
7.97708e-21	-1.55084	0.93	0.945	1.94864e-16	Rpl38	N0	Down	Spleen
1.20788e-20	-2.15351	0.122	0.462	2.9506e-16	Elf1	N0	Down	Spleen
1.48219e-20	-1.52876	0.428	0.813	3.62068e-16	Snrpd2	N0	Down	Spleen
1.61117e-20	-1.59164	0.135	0.505	3.93576e-16	Mef2c	N0	Down	Spleen
1.88568e-20	-1.75663	0.107	0.451	4.60633e-16	Bola3	N0	Down	Spleen
2.45649e-20	-2.0767	0.184	0.538	6.00071e-16	Kpnb1	N0	Down	Spleen
2.57555e-20	-1.42099	0.484	0.791	6.29156e-16	Sfpq	N0	Down	Spleen
3.33446e-20	-2.14655	0.132	0.462	8.14542e-16	Ak6	N0	Down	Spleen
3.87897e-20	-1.62487	0.914	0.945	9.47554e-16	Tuba1b	N0	Down	Spleen
4.07453e-20	-2.54514	0.153	0.495	9.95326e-16	Nhp2	N0	Down	Spleen
4.46506e-20	-2.06774	0.164	0.516	1.09073e-15	Fubp1	N0	Down	Spleen
4.63952e-20	-1.58538	0.636	0.868	1.13334e-15	Nap1l1	N0	Down	Spleen
4.66708e-20	-2.63314	0.122	0.44	1.14007e-15	Nop58	N0	Down	Spleen
7.63499e-20	-2.35726	0.106	0.429	1.86508e-15	Ahsa1	N0	Down	Spleen
1.15884e-19	-2.44906	0.106	0.418	2.83081e-15	Vars	N0	Down	Spleen
1.19352e-19	-1.28192	0.93	0.956	2.91554e-15	Ran	N0	Down	Spleen
1.35638e-19	-2.06055	0.13	0.462	3.31337e-15	Rfc5	N0	Down	Spleen
3.83463e-19	-1.50603	0.98	1	9.36722e-15	Gapdh	N0	Down	Spleen
4.23432e-19	-1.94692	0.162	0.538	1.03436e-14	Dad1	N0	Down	Spleen
5.81387e-19	-1.93066	0.508	0.791	1.42021e-14	Set	N0	Down	Spleen
7.60978e-19	-2.04378	0.204	0.549	1.85892e-14	Cct4	N0	Down	Spleen
7.7153e-19	-1.8404	0.266	0.626	1.88469e-14	G3bp1	N0	Down	Spleen
8.01921e-19	-1.85522	0.259	0.604	1.95893e-14	Eif4h	N0	Down	Spleen
8.49422e-19	-1.61994	0.36	0.725	2.07497e-14	Nsa2	N0	Down	Spleen
1.07999e-18	-1.40351	0.651	0.879	2.6382e-14	Gnas	N0	Down	Spleen
1.09584e-18	-2.1104	0.155	0.495	2.67691e-14	Sh3glb1	N0	Down	Spleen
1.43584e-18	-1.4836	0.572	0.813	3.50746e-14	Banf1	N0	Down	Spleen
1.48375e-18	-1.18076	0.672	0.912	3.6245e-14	Cox6a1	N0	Down	Spleen
1.73807e-18	-2.15727	0.107	0.407	4.24575e-14	Trappc1	N0	Down	Spleen
1.97557e-18	-2.0278	0.191	0.527	4.82591e-14	Ppil1	N0	Down	Spleen
2.56478e-18	-1.81406	0.19	0.538	6.26525e-14	Plekhj1	N0	Down	Spleen
2.78452e-18	-1.86364	0.265	0.648	6.80203e-14	Cox7a2l	N0	Down	Spleen
3.45627e-18	-1.48318	0.383	0.747	8.44297e-14	Eif3a	N0	Down	Spleen
4.37247e-18	-2.15151	0.116	0.418	1.06811e-13	Prelid3b	N0	Down	Spleen
4.42288e-18	-1.44926	0.454	0.802	1.08042e-13	Fus	N0	Down	Spleen
5.63741e-18	-1.76796	0.243	0.604	1.37711e-13	Cyc1	N0	Down	Spleen
1.11916e-17	-1.32078	0.577	0.868	2.73388e-13	Atp5c1	N0	Down	Spleen
1.19634e-17	-1.4071	0.507	0.802	2.92241e-13	Psma7	N0	Down	Spleen
1.26811e-17	-1.24203	0.435	0.78	3.09774e-13	Psma3	N0	Down	Spleen
1.2832e-17	-1.18675	0.893	0.912	3.13461e-13	B2m	N0	Down	Spleen
1.36577e-17	-2.00422	0.182	0.516	3.33631e-13	Llph	N0	Down	Spleen
1.65968e-17	-2.22355	0.105	0.396	4.05428e-13	Eif3g	N0	Down	Spleen
2.20361e-17	-2.17373	0.122	0.418	5.38299e-13	Ndufs3	N0	Down	Spleen
2.80675e-17	-2.18633	0.352	0.714	6.85634e-13	Erh	N0	Down	Spleen
3.12268e-17	-1.10856	0.956	0.989	7.62809e-13	Actg1	N0	Down	Spleen
3.29159e-17	-1.44992	0.927	0.956	8.0407e-13	Rpl17	N0	Down	Spleen
4.44519e-17	-1.54982	0.314	0.692	1.08587e-12	Srsf11	N0	Down	Spleen
1.14593e-16	-2.02053	0.149	0.451	2.79927e-12	Sfxn1	N0	Down	Spleen
1.54404e-16	-1.93815	0.145	0.462	3.77179e-12	Gspt1	N0	Down	Spleen
1.60487e-16	-1.758	0.209	0.56	3.92038e-12	Nme1	N0	Down	Spleen
1.76832e-16	-1.5834	0.768	0.857	4.31966e-12	H2-D1	N0	Down	Spleen
1.82662e-16	-2.027	0.178	0.495	4.46208e-12	Snrpa1	N0	Down	Spleen
1.86021e-16	-1.83804	0.385	0.736	4.54411e-12	Snu13	N0	Down	Spleen
1.90412e-16	-1.74601	0.246	0.604	4.65138e-12	Prrc2c	N0	Down	Spleen
1.91456e-16	-1.72552	0.268	0.593	4.6769e-12	Ndufb6	N0	Down	Spleen
2.15194e-16	-2.08456	0.139	0.44	5.25676e-12	Txn2	N0	Down	Spleen
2.39361e-16	-2.12617	0.102	0.374	5.8471e-12	Taf1d	N0	Down	Spleen
2.95421e-16	-1.23183	0.605	0.813	7.21655e-12	Ywhae	N0	Down	Spleen
3.68839e-16	-1.82301	0.253	0.615	9.00999e-12	Grcc10	N0	Down	Spleen
3.80812e-16	-2.06619	0.161	0.495	9.30248e-12	Bptf	N0	Down	Spleen
4.7625e-16	-1.65123	0.674	0.868	1.16338e-11	mt-Nd4	N0	Down	Spleen
5.59161e-16	-2.08845	0.117	0.407	1.36592e-11	Got2	N0	Down	Spleen
6.34125e-16	-1.67645	0.366	0.703	1.54904e-11	Tomm20	N0	Down	Spleen
6.87479e-16	-1.99161	0.184	0.505	1.67937e-11	Tgfb1	N0	Down	Spleen
8.47091e-16	-2.25386	0.12	0.407	2.06927e-11	St13	N0	Down	Spleen
1.21788e-15	-1.75924	0.178	0.473	2.97504e-11	Uqcrc1	N0	Down	Spleen
1.24434e-15	-1.49279	0.321	0.637	3.03967e-11	Uqcrfs1	N0	Down	Spleen
1.47828e-15	-1.88437	0.141	0.44	3.61115e-11	Dnajc7	N0	Down	Spleen
1.57863e-15	-1.93751	0.171	0.484	3.85627e-11	Eif5b	N0	Down	Spleen
1.82189e-15	-1.54825	0.231	0.56	4.45052e-11	Exosc8	N0	Down	Spleen
2.10728e-15	-1.86857	0.182	0.495	5.14766e-11	Paics	N0	Down	Spleen
2.37665e-15	-1.10151	0.594	0.846	5.80569e-11	Psmb1	N0	Down	Spleen
2.62391e-15	-1.95951	0.275	0.593	6.4097e-11	Hnrnpa0	N0	Down	Spleen
2.64301e-15	-2.25449	0.12	0.396	6.45634e-11	Prmt1	N0	Down	Spleen
2.72604e-15	-1.78188	0.265	0.604	6.65918e-11	Erp29	N0	Down	Spleen
3.53992e-15	-1.27272	0.64	0.857	8.64732e-11	Eif3k	N0	Down	Spleen
3.62982e-15	-2.13915	0.168	0.473	8.86693e-11	Dnajc2	N0	Down	Spleen
4.98309e-15	-1.95926	0.278	0.582	1.21727e-10	Eno1	N0	Down	Spleen
5.81256e-15	-1.8462	0.173	0.484	1.41989e-10	Cib1	N0	Down	Spleen
5.84044e-15	-2.66297	0.181	0.484	1.4267e-10	mt-Nd3	N0	Down	Spleen
5.9253e-15	-1.48938	0.377	0.692	1.44743e-10	Anapc5	N0	Down	Spleen
6.80454e-15	-2.0993	0.297	0.615	1.66221e-10	Lsp1	N0	Down	Spleen
8.69526e-15	-1.10495	0.808	0.923	2.12408e-10	Hint1	N0	Down	Spleen
9.8518e-15	-1.6552	0.337	0.648	2.4066e-10	Serp1	N0	Down	Spleen
1.03058e-14	-2.10918	0.106	0.363	2.5175e-10	Rcc1	N0	Down	Spleen
1.60914e-14	-2.01075	0.134	0.418	3.9308e-10	Ghitm	N0	Down	Spleen
2.01824e-14	-1.2737	0.396	0.725	4.93015e-10	Nono	N0	Down	Spleen
2.46499e-14	-1.62483	0.317	0.604	6.02148e-10	Cct7	N0	Down	Spleen
2.56122e-14	-1.77549	0.127	0.407	6.25655e-10	Ybx3	N0	Down	Spleen
3.25652e-14	-1.34039	0.601	0.791	7.95502e-10	Jpt1	N0	Down	Spleen
3.89272e-14	-1.91434	0.209	0.527	9.50914e-10	Cacybp	N0	Down	Spleen
3.96155e-14	-1.5439	0.315	0.637	9.67728e-10	Ptp4a2	N0	Down	Spleen
4.67631e-14	-2.38355	0.117	0.374	1.14233e-09	Rrp1	N0	Down	Spleen
5.65744e-14	-1.42405	0.872	0.956	1.382e-09	Eif5a	N0	Down	Spleen
6.45223e-14	-1.48754	0.388	0.67	1.57615e-09	Swi5	N0	Down	Spleen
7.72113e-14	-1.8477	0.158	0.44	1.88612e-09	Psmd1	N0	Down	Spleen
9.20222e-14	-1.58244	0.272	0.56	2.24792e-09	Cct8	N0	Down	Spleen
9.83148e-14	-1.59981	0.204	0.516	2.40163e-09	Pnn	N0	Down	Spleen
1.1125e-13	-2.08738	0.127	0.385	2.71762e-09	Polr2f	N0	Down	Spleen
1.18932e-13	-1.42797	0.331	0.637	2.90527e-09	Psma4	N0	Down	Spleen
1.2225e-13	-1.8582	0.211	0.516	2.98633e-09	Ndufa12	N0	Down	Spleen
1.25565e-13	-1.78168	0.204	0.495	3.06731e-09	Hspa4	N0	Down	Spleen
1.40635e-13	-1.02672	0.93	0.934	3.43544e-09	Rps25	N0	Down	Spleen
1.6221e-13	-1.51395	0.314	0.637	3.96247e-09	Srsf1	N0	Down	Spleen
1.62792e-13	-2.2327	0.112	0.363	3.97669e-09	Lsm7	N0	Down	Spleen
1.69475e-13	-1.05935	0.57	0.802	4.13994e-09	Ube2i	N0	Down	Spleen
1.80606e-13	-1.41801	0.28	0.593	4.41184e-09	Tcea1	N0	Down	Spleen
2.17649e-13	-1.33592	0.673	0.824	5.31674e-09	Sub1	N0	Down	Spleen
2.45554e-13	-1.8388	0.248	0.549	5.99839e-09	Sdhb	N0	Down	Spleen
2.62558e-13	-1.54957	0.311	0.615	6.41376e-09	Eif3c	N0	Down	Spleen
2.7033e-13	-1.94263	0.116	0.374	6.60362e-09	Idh3g	N0	Down	Spleen
2.75081e-13	-1.27212	0.432	0.703	6.71967e-09	Lsm4	N0	Down	Spleen
2.90796e-13	-1.49135	0.216	0.527	7.10357e-09	Khdrbs1	N0	Down	Spleen
2.95323e-13	-1.75711	0.135	0.407	7.21416e-09	Stoml2	N0	Down	Spleen
3.10783e-13	-1.72816	0.167	0.451	7.59181e-09	Etfa	N0	Down	Spleen
3.14812e-13	-1.76846	0.272	0.56	7.69022e-09	Rbbp7	N0	Down	Spleen
3.27502e-13	-1.45038	0.23	0.538	8.00021e-09	Brd2	N0	Down	Spleen
3.64774e-13	-1.92809	0.171	0.44	8.91069e-09	Uchl3	N0	Down	Spleen
5.96024e-13	-1.91796	0.106	0.352	1.45597e-08	Ift27	N0	Down	Spleen
6.49217e-13	-1.09782	0.994	0.978	1.58591e-08	Rpl41	N0	Down	Spleen
6.76734e-13	-1.12073	0.581	0.802	1.65312e-08	Srsf7	N0	Down	Spleen
9.89051e-13	-2.911	0.779	0.912	2.41605e-08	Uba52	N0	Down	Spleen
1.02991e-12	-1.38602	0.551	0.769	2.51587e-08	Ranbp1	N0	Down	Spleen
1.27367e-12	-1.25504	0.676	0.857	3.11133e-08	Srsf2	N0	Down	Spleen
1.53127e-12	-1.71625	0.178	0.451	3.74059e-08	Odc1	N0	Down	Spleen
1.56098e-12	-1.82944	0.23	0.516	3.81317e-08	Tomm5	N0	Down	Spleen
1.6486e-12	-1.39632	0.351	0.659	4.0272e-08	Ube2d2a	N0	Down	Spleen
1.72355e-12	-1.11202	0.422	0.692	4.21029e-08	Srrm1	N0	Down	Spleen
1.82957e-12	-1.73518	0.176	0.451	4.46928e-08	Eif2s1	N0	Down	Spleen
1.87899e-12	-1.71591	0.164	0.451	4.58999e-08	Aimp1	N0	Down	Spleen
2.05077e-12	-1.59905	0.182	0.473	5.00962e-08	Uqcrc2	N0	Down	Spleen
2.2895e-12	-2.25223	0.17	0.44	5.5928e-08	Ctsz	N0	Down	Spleen
2.39235e-12	-1.89299	0.148	0.407	5.84402e-08	Psmd7	N0	Down	Spleen
2.47743e-12	-1.50306	0.36	0.593	6.05187e-08	Ssrp1	N0	Down	Spleen
2.76235e-12	-1.6387	0.261	0.582	6.74786e-08	Sp100	N0	Down	Spleen
2.78156e-12	-2.13408	0.107	0.341	6.79478e-08	Lrp10	N0	Down	Spleen
2.83926e-12	-1.53425	0.284	0.549	6.93575e-08	Maz	N0	Down	Spleen
2.89492e-12	-1.57448	0.203	0.495	7.0717e-08	Mtdh	N0	Down	Spleen
2.93238e-12	-1.82852	0.26	0.527	7.16321e-08	Psip1	N0	Down	Spleen
3.18059e-12	-1.22984	0.52	0.769	7.76953e-08	Cox7b	N0	Down	Spleen
4.15232e-12	-1.77066	0.14	0.407	1.01433e-07	Mknk2	N0	Down	Spleen
4.52145e-12	-1.41402	0.321	0.604	1.1045e-07	Mrfap1	N0	Down	Spleen
4.54402e-12	-1.60639	0.172	0.451	1.11001e-07	Ndufs2	N0	Down	Spleen
5.043e-12	-1.87947	0.101	0.33	1.2319e-07	Tomm70a	N0	Down	Spleen
5.13055e-12	-1.08243	0.643	0.791	1.25329e-07	Snrpb	N0	Down	Spleen
5.80352e-12	-1.11548	0.461	0.714	1.41768e-07	Ewsr1	N0	Down	Spleen
6.36741e-12	-1.83936	0.12	0.363	1.55543e-07	Ube2r2	N0	Down	Spleen
6.68348e-12	-1.49632	0.226	0.505	1.63264e-07	Mrpl30	N0	Down	Spleen
6.86541e-12	-1.33155	0.48	0.725	1.67708e-07	Nudt21	N0	Down	Spleen
7.42082e-12	-1.66985	0.145	0.396	1.81276e-07	Cops6	N0	Down	Spleen
8.0304e-12	-1.44206	0.272	0.538	1.96167e-07	Pdap1	N0	Down	Spleen
8.07516e-12	-1.31559	0.291	0.571	1.9726e-07	Canx	N0	Down	Spleen
8.15272e-12	-1.92139	0.332	0.615	1.99155e-07	Lars2	N0	Down	Spleen
8.18755e-12	-1.67683	0.164	0.429	2.00005e-07	Smarcc1	N0	Down	Spleen
8.46136e-12	-1.76297	0.106	0.341	2.06694e-07	Nudt5	N0	Down	Spleen
8.7574e-12	-1.51716	0.191	0.473	2.13926e-07	Bclaf1	N0	Down	Spleen
9.73699e-12	-1.6304	0.152	0.418	2.37855e-07	Prpf8	N0	Down	Spleen
1.07329e-11	-1.81399	0.137	0.385	2.62183e-07	Polr2m	N0	Down	Spleen
1.18801e-11	-1.86183	0.14	0.385	2.90208e-07	Ubtf	N0	Down	Spleen
1.22491e-11	-1.80103	0.112	0.352	2.99221e-07	Babam1	N0	Down	Spleen
1.2451e-11	-1.70206	0.256	0.549	3.04154e-07	Chd4	N0	Down	Spleen
1.36027e-11	-1.83944	0.116	0.363	3.32288e-07	Ddx24	N0	Down	Spleen
1.62231e-11	-1.79339	0.103	0.33	3.96298e-07	Szrd1	N0	Down	Spleen
1.81985e-11	-1.77997	0.133	0.374	4.44553e-07	Haus4	N0	Down	Spleen
1.87513e-11	-1.63211	0.126	0.374	4.58057e-07	Abcf1	N0	Down	Spleen
2.15736e-11	-1.98968	0.134	0.374	5.27e-07	Denr	N0	Down	Spleen
2.24502e-11	-1.15601	0.405	0.681	5.48413e-07	Ssb	N0	Down	Spleen
2.49581e-11	-1.09405	0.456	0.692	6.09676e-07	Smarca5	N0	Down	Spleen
2.86032e-11	-1.54413	0.222	0.495	6.98719e-07	Gltp	N0	Down	Spleen
2.96753e-11	-1.93011	0.124	0.352	7.24907e-07	Imp3	N0	Down	Spleen
3.02561e-11	-1.98257	0.149	0.396	7.39096e-07	Mat2a	N0	Down	Spleen
3.06184e-11	-2.01043	0.103	0.319	7.47946e-07	Eprs	N0	Down	Spleen
3.15899e-11	-2.24293	0.128	0.352	7.71679e-07	Nrm	N0	Down	Spleen
3.27773e-11	-1.82074	0.11	0.33	8.00683e-07	Cyb5b	N0	Down	Spleen
3.47288e-11	-1.50653	0.285	0.538	8.48354e-07	Rbm38	N0	Down	Spleen
3.7941e-11	-1.96967	0.105	0.33	9.26824e-07	Strbp	N0	Down	Spleen
3.84046e-11	-1.8649	0.11	0.33	9.38148e-07	Mrps26	N0	Down	Spleen
6.05359e-11	-1.19394	0.55	0.747	1.47877e-06	Polr1d	N0	Down	Spleen
6.6094e-11	-1.79971	0.132	0.363	1.61454e-06	Mrpl21	N0	Down	Spleen
7.18893e-11	-1.80932	0.142	0.374	1.75611e-06	Dhfr	N0	Down	Spleen
7.37204e-11	-1.43048	0.39	0.648	1.80084e-06	Atp5g1	N0	Down	Spleen
7.91747e-11	-1.4223	0.472	0.692	1.93408e-06	Hsp90b1	N0	Down	Spleen
7.97695e-11	-1.62567	0.175	0.418	1.94861e-06	Map2k2	N0	Down	Spleen
8.53822e-11	-1.70015	0.137	0.374	2.08572e-06	Eif4e2	N0	Down	Spleen
8.78711e-11	-1.79226	0.127	0.363	2.14652e-06	Sf3b4	N0	Down	Spleen
1.05054e-10	-1.0721	0.369	0.626	2.56627e-06	Acin1	N0	Down	Spleen
1.08236e-10	-1.9082	0.191	0.44	2.64398e-06	Puf60	N0	Down	Spleen
1.31698e-10	-1.78182	0.161	0.407	3.21712e-06	Mrpl54	N0	Down	Spleen
1.46988e-10	-1.5026	0.162	0.407	3.59062e-06	Tceal9	N0	Down	Spleen
1.52291e-10	-1.21623	0.623	0.747	3.72016e-06	Lmnb1	N0	Down	Spleen
1.76059e-10	-1.7503	0.139	0.374	4.30077e-06	Ube2m	N0	Down	Spleen
1.77547e-10	-1.53149	0.207	0.462	4.33712e-06	Prpf38b	N0	Down	Spleen
1.92999e-10	-1.51382	0.533	0.747	4.71459e-06	Cnn2	N0	Down	Spleen
2.11247e-10	-1.34028	0.252	0.505	5.16035e-06	Ndufs8	N0	Down	Spleen
2.4431e-10	-1.36025	0.292	0.571	5.96802e-06	Smchd1	N0	Down	Spleen
2.5867e-10	-1.16683	0.68	0.791	6.31878e-06	Hnrnpab	N0	Down	Spleen
2.65384e-10	-1.19467	0.435	0.637	6.48279e-06	Ywhaq	N0	Down	Spleen
3.06568e-10	-1.3027	0.305	0.571	7.48883e-06	Dazap1	N0	Down	Spleen
3.22778e-10	-1.47203	0.196	0.484	7.88481e-06	Jak1	N0	Down	Spleen
3.40351e-10	-1.93125	0.119	0.341	8.3141e-06	Rnh1	N0	Down	Spleen
3.52807e-10	-1.27639	0.34	0.615	8.61837e-06	Ube2n	N0	Down	Spleen
3.94605e-10	-1.70307	0.135	0.363	9.63941e-06	Psme3	N0	Down	Spleen
4.16609e-10	-1.72649	0.193	0.44	1.01769e-05	Smarca4	N0	Down	Spleen
4.2291e-10	-1.21483	0.29	0.549	1.03309e-05	Srsf6	N0	Down	Spleen
4.4378e-10	-1.4817	0.227	0.473	1.08407e-05	Sae1	N0	Down	Spleen
4.5183e-10	-1.48095	0.204	0.451	1.10373e-05	Fen1	N0	Down	Spleen
5.05884e-10	-1.68059	0.155	0.385	1.23577e-05	Mtch2	N0	Down	Spleen
5.27424e-10	-1.59704	0.255	0.484	1.28839e-05	Rfc2	N0	Down	Spleen
5.63003e-10	-1.39764	0.223	0.462	1.3753e-05	Ndufb4	N0	Down	Spleen
5.86944e-10	-1.33948	0.366	0.571	1.43379e-05	Psmb9	N0	Down	Spleen
6.92398e-10	-1.51117	0.197	0.429	1.69139e-05	Zc3h15	N0	Down	Spleen
7.55566e-10	-1.56025	0.154	0.385	1.8457e-05	Psmc1	N0	Down	Spleen
8.62188e-10	-1.54615	0.143	0.374	2.10615e-05	Pnisr	N0	Down	Spleen
8.683e-10	-1.53985	0.196	0.44	2.12108e-05	Rbmxl1	N0	Down	Spleen
8.79306e-10	-1.35267	0.246	0.495	2.14797e-05	Kif22	N0	Down	Spleen
9.12585e-10	-1.28967	0.272	0.549	2.22926e-05	Krtcap2	N0	Down	Spleen
9.18015e-10	-1.70326	0.12	0.341	2.24253e-05	Ola1	N0	Down	Spleen
1.09469e-09	-1.44792	0.238	0.484	2.6741e-05	U2af2	N0	Down	Spleen
1.18902e-09	-1.37632	0.325	0.571	2.90454e-05	Nudc	N0	Down	Spleen
1.20978e-09	-1.79389	0.105	0.308	2.95525e-05	Ythdf2	N0	Down	Spleen
1.28626e-09	-1.13813	0.458	0.681	3.14208e-05	Snx3	N0	Down	Spleen
1.32332e-09	-1.02133	0.459	0.659	3.2326e-05	Prpf40a	N0	Down	Spleen
1.44904e-09	-1.4291	0.193	0.429	3.53971e-05	Psmc4	N0	Down	Spleen
1.49287e-09	-1.32016	0.221	0.484	3.64677e-05	Pfdn6	N0	Down	Spleen
1.61587e-09	-1.4168	0.258	0.484	3.94725e-05	Luc7l3	N0	Down	Spleen
1.64193e-09	-1.81531	0.111	0.308	4.01091e-05	Fcf1	N0	Down	Spleen
1.80148e-09	-1.19326	0.401	0.637	4.40066e-05	Lsm2	N0	Down	Spleen
1.89584e-09	-1.43696	0.308	0.549	4.63116e-05	Pdcd5	N0	Down	Spleen
1.90302e-09	-1.54551	0.169	0.396	4.64869e-05	Oxct1	N0	Down	Spleen
2.01031e-09	-1.35697	0.238	0.484	4.91079e-05	Srsf9	N0	Down	Spleen
2.03467e-09	-1.7187	0.116	0.319	4.9703e-05	Aarsd1	N0	Down	Spleen
2.43271e-09	-1.79136	0.15	0.374	5.94261e-05	Ndufa10	N0	Down	Spleen
2.51467e-09	-1.74967	0.493	0.681	6.14283e-05	Limd2	N0	Down	Spleen
2.64761e-09	-1.42109	0.269	0.495	6.46758e-05	Tk1	N0	Down	Spleen
2.6939e-09	-1.50547	0.153	0.374	6.58067e-05	Sdf2l1	N0	Down	Spleen
2.78592e-09	-1.73977	0.146	0.363	6.80545e-05	Top2b	N0	Down	Spleen
2.83111e-09	-1.63165	0.132	0.341	6.91584e-05	Usp14	N0	Down	Spleen
2.87583e-09	-1.16769	0.334	0.593	7.02508e-05	Metap2	N0	Down	Spleen
2.93612e-09	-1.65806	0.137	0.341	7.17235e-05	Ppih	N0	Down	Spleen
3.2283e-09	-1.05519	0.38	0.604	7.88609e-05	Hnrnpc	N0	Down	Spleen
3.5783e-09	-1.19948	0.357	0.604	8.74107e-05	Phf5a	N0	Down	Spleen
3.73384e-09	-1.06797	0.342	0.593	9.12102e-05	Snrpc	N0	Down	Spleen
4.07377e-09	-1.50127	0.201	0.418	9.9514e-05	Mrpl28	N0	Down	Spleen
4.57539e-09	-1.5588	0.15	0.374	0.000111768	Mrpl13	N0	Down	Spleen
4.69037e-09	-1.1858	0.514	0.67	0.000114576	Hdgf	N0	Down	Spleen
5.14189e-09	-1.59987	0.176	0.407	0.000125606	Sdhd	N0	Down	Spleen
5.42561e-09	-1.70195	0.17	0.396	0.000132537	Psmc5	N0	Down	Spleen
5.74893e-09	-2.0251	0.104	0.297	0.000140435	Kmt2a	N0	Down	Spleen
5.75809e-09	-1.81586	0.2	0.418	0.000140659	Pole4	N0	Down	Spleen
6.23599e-09	-1.45574	0.246	0.484	0.000152333	Cdc37	N0	Down	Spleen
6.59774e-09	-1.51832	0.181	0.407	0.00016117	Arl6ip4	N0	Down	Spleen
6.9645e-09	-1.2409	0.321	0.549	0.000170129	Vdac1	N0	Down	Spleen
7.17603e-09	-1.49437	0.166	0.396	0.000175296	Eif4g1	N0	Down	Spleen
7.52832e-09	-1.07241	0.318	0.549	0.000183902	Bcas2	N0	Down	Spleen
7.66969e-09	-1.87469	0.106	0.297	0.000187355	Psmd3	N0	Down	Spleen
7.8016e-09	-1.66781	0.226	0.451	0.000190577	Prrc2a	N0	Down	Spleen
7.98758e-09	-1.28477	0.379	0.582	0.000195121	Sap18	N0	Down	Spleen
8.83442e-09	-1.12982	0.337	0.582	0.000215807	Mcm6	N0	Down	Spleen
8.95252e-09	-1.0638	0.518	0.692	0.000218692	Pomp	N0	Down	Spleen
9.65311e-09	-1.55792	0.171	0.374	0.000235806	Rpa2	N0	Down	Spleen
9.70385e-09	-1.42005	0.191	0.418	0.000237046	Tcf25	N0	Down	Spleen
9.7233e-09	-1.24182	0.389	0.604	0.000237521	Park7	N0	Down	Spleen
1.05639e-08	-1.22684	0.121	0.341	0.000258055	Nfatc3	N0	Down	Spleen
1.07781e-08	-1.21522	0.313	0.538	0.000263287	Dnaja1	N0	Down	Spleen
1.09464e-08	-1.6378	0.16	0.374	0.000267398	Emc6	N0	Down	Spleen
1.12228e-08	-1.4864	0.163	0.385	0.000274152	Ccdc124	N0	Down	Spleen
1.14266e-08	-1.67261	0.116	0.319	0.00027913	Ivns1abp	N0	Down	Spleen
1.14297e-08	-1.84484	0.107	0.308	0.000279204	Spag7	N0	Down	Spleen
1.15894e-08	-1.55789	0.184	0.407	0.000283106	Purb	N0	Down	Spleen
1.34002e-08	-1.68921	0.143	0.352	0.000327339	Dhx9	N0	Down	Spleen
1.39567e-08	-1.63452	0.116	0.308	0.000340935	Rad23b	N0	Down	Spleen
1.48048e-08	-1.66971	0.111	0.308	0.000361652	Nars	N0	Down	Spleen
1.53048e-08	-1.55712	0.129	0.33	0.000373865	Bckdk	N0	Down	Spleen
1.55049e-08	-1.52424	0.138	0.352	0.000378753	Slirp	N0	Down	Spleen
1.59256e-08	-1.72732	0.172	0.385	0.00038903	Mrpl17	N0	Down	Spleen
1.81563e-08	-1.72856	0.118	0.319	0.000443523	Cyb5a	N0	Down	Spleen
1.96048e-08	-1.41585	0.155	0.363	0.000478905	Dap3	N0	Down	Spleen
2.14784e-08	-1.46059	0.2	0.44	0.000524675	Med28	N0	Down	Spleen
2.23511e-08	-1.32672	0.216	0.451	0.000545993	Ubap2l	N0	Down	Spleen
2.40415e-08	-1.62366	0.104	0.297	0.000587286	Sp110	N0	Down	Spleen
2.54444e-08	-1.70648	0.125	0.319	0.000621555	Pole3	N0	Down	Spleen
2.57865e-08	-1.46097	0.221	0.451	0.000629913	Strap	N0	Down	Spleen
2.62759e-08	-1.25075	0.24	0.462	0.000641868	Hells	N0	Down	Spleen
2.63857e-08	-1.44357	0.185	0.396	0.000644549	Bcl7c	N0	Down	Spleen
2.81392e-08	-1.56121	0.168	0.396	0.000687385	Mycbp2	N0	Down	Spleen
3.01658e-08	-1.77944	0.21	0.407	0.00073689	Unc93b1	N0	Down	Spleen
3.03626e-08	-1.40904	0.204	0.418	0.000741699	Tardbp	N0	Down	Spleen
3.36288e-08	-1.52039	0.143	0.341	0.000821483	Cdc26	N0	Down	Spleen
3.48868e-08	-1.76621	0.151	0.352	0.000852216	Epn1	N0	Down	Spleen
3.66473e-08	-1.34502	0.266	0.484	0.000895219	Cbx5	N0	Down	Spleen
4.33222e-08	-1.49726	0.14	0.341	0.00105828	Arf4	N0	Down	Spleen
4.40993e-08	-2.21213	0.122	0.297	0.00107726	Kpna2	N0	Down	Spleen
4.54159e-08	-1.30642	0.296	0.516	0.00110942	Tsn	N0	Down	Spleen
4.54448e-08	-1.3068	0.228	0.451	0.00111013	Pin1	N0	Down	Spleen
4.56126e-08	-1.21585	0.262	0.484	0.00111422	Anapc11	N0	Down	Spleen
5.16205e-08	-1.45646	0.228	0.44	0.00126098	Wdr83os	N0	Down	Spleen
5.26615e-08	-1.31143	0.253	0.462	0.00128642	Rnps1	N0	Down	Spleen
6.1233e-08	-1.39894	0.106	0.286	0.0014958	Slc38a1	N0	Down	Spleen
6.73529e-08	-1.65933	0.155	0.352	0.0016453	Eif3j1	N0	Down	Spleen
7.12814e-08	-1.50334	0.189	0.374	0.00174126	Cs	N0	Down	Spleen
7.2319e-08	-1.37156	0.155	0.363	0.00176661	Bax	N0	Down	Spleen
7.45045e-08	-1.33412	0.211	0.429	0.00182	Dnajc19	N0	Down	Spleen
7.60272e-08	-1.59997	0.148	0.352	0.00185719	Uba1	N0	Down	Spleen
8.18993e-08	-1.26392	0.258	0.462	0.00200063	P4hb	N0	Down	Spleen
8.47477e-08	-1.18745	0.272	0.495	0.00207022	Ppm1g	N0	Down	Spleen
8.73875e-08	-1.26483	0.17	0.374	0.0021347	Acp1	N0	Down	Spleen
8.89204e-08	-1.94458	0.121	0.308	0.00217215	Ik	N0	Down	Spleen
9.59577e-08	-1.075	0.5	0.692	0.00234406	Raly	N0	Down	Spleen
9.84873e-08	-1.89105	0.152	0.341	0.00240585	Capg	N0	Down	Spleen
1.01227e-07	-1.31224	0.162	0.374	0.00247278	Mrps36	N0	Down	Spleen
1.02302e-07	-1.52759	0.137	0.33	0.00249903	Ssr2	N0	Down	Spleen
1.08331e-07	-1.34151	0.238	0.451	0.00264631	U2surp	N0	Down	Spleen
1.13934e-07	-1.17646	0.228	0.44	0.00278317	Tmed9	N0	Down	Spleen
1.14022e-07	-1.21363	0.238	0.451	0.00278533	Rfc4	N0	Down	Spleen
1.14423e-07	-1.15006	0.215	0.44	0.00279514	Cpsf6	N0	Down	Spleen
1.23453e-07	-1.37738	0.211	0.418	0.00301572	Gng10	N0	Down	Spleen
1.40242e-07	-1.4288	0.18	0.396	0.00342583	Lage3	N0	Down	Spleen
1.51654e-07	-1.43868	0.137	0.341	0.00370459	Sdha	N0	Down	Spleen
1.68506e-07	-1.41269	0.138	0.33	0.00411627	Tapbp	N0	Down	Spleen
1.69607e-07	-1.02338	0.488	0.692	0.00414315	Tpr	N0	Down	Spleen
1.78355e-07	-1.54665	0.109	0.286	0.00435685	Cnih1	N0	Down	Spleen
1.79259e-07	-1.01088	0.428	0.637	0.00437893	Psmb6	N0	Down	Spleen
1.85343e-07	-1.33057	0.146	0.363	0.00452757	Macf1	N0	Down	Spleen
1.91495e-07	-1.30121	0.155	0.352	0.00467783	Bak1	N0	Down	Spleen
2.03664e-07	-1.46181	0.182	0.407	0.00497511	Npc2	N0	Down	Spleen
2.04554e-07	-1.73946	0.122	0.297	0.00499685	Nabp2	N0	Down	Spleen
2.05589e-07	-1.32916	0.163	0.363	0.00502213	Immt	N0	Down	Spleen
2.14427e-07	-1.3872	0.132	0.319	0.00523801	Cfdp1	N0	Down	Spleen
2.5447e-07	-1.64686	0.148	0.33	0.00621619	Taok3	N0	Down	Spleen
2.75538e-07	-1.5091	0.129	0.308	0.00673084	Casp3	N0	Down	Spleen
2.76158e-07	-1.29846	0.147	0.352	0.006746	Tmed5	N0	Down	Spleen
2.89413e-07	-1.61347	0.125	0.308	0.00706979	Cpsf2	N0	Down	Spleen
2.93873e-07	-1.40326	0.243	0.44	0.00717872	Naa50	N0	Down	Spleen
3.97387e-07	-1.46883	0.132	0.319	0.00970738	Eif3d	N0	Down	Spleen
4.15878e-07	-1.10513	0.247	0.484	0.0101591	Ddx6	N0	Down	Spleen
4.29538e-07	-1.32142	0.204	0.407	0.0104928	Paip2	N0	Down	Spleen
4.55952e-07	-1.26472	0.217	0.429	0.011138	Psmd11	N0	Down	Spleen
5.36429e-07	-1.03259	0.108	0.286	0.0131039	Rabgap1l	N0	Down	Spleen
5.68691e-07	-1.49896	0.143	0.319	0.013892	Rcc2	N0	Down	Spleen
5.84405e-07	-1.36888	0.137	0.319	0.0142758	Pbdc1	N0	Down	Spleen
5.85754e-07	-1.61803	0.122	0.286	0.0143088	Wdfy4	N0	Down	Spleen
5.98473e-07	-1.39405	0.106	0.275	0.0146195	Hikeshi	N0	Down	Spleen
6.10393e-07	-1.3104	0.165	0.363	0.0149107	Pfdn1	N0	Down	Spleen
6.32501e-07	-1.41532	0.169	0.352	0.0154507	Ufc1	N0	Down	Spleen
7.16574e-07	-1.10753	0.28	0.484	0.0175045	Ap2m1	N0	Down	Spleen
7.99126e-07	-1.16147	0.377	0.571	0.019521	Ndufab1	N0	Down	Spleen
8.2815e-07	-1.22955	0.279	0.484	0.02023	Psma5	N0	Down	Spleen
8.28489e-07	-1.41841	0.122	0.297	0.0202383	Rad23a	N0	Down	Spleen
8.68622e-07	-1.97579	0.111	0.275	0.0212187	Ppp4r2	N0	Down	Spleen
8.88241e-07	-1.21069	0.376	0.527	0.021698	Mcm3	N0	Down	Spleen
9.98699e-07	-1.20759	0.293	0.505	0.0243962	Csde1	N0	Down	Spleen
1.02703e-06	-1.41769	0.191	0.385	0.0250883	Ptpa	N0	Down	Spleen
1.10211e-06	-1.57819	0.121	0.286	0.0269224	Meaf6	N0	Down	Spleen
1.20408e-06	-1.29775	0.202	0.385	0.0294133	Rfc3	N0	Down	Spleen
1.29677e-06	-1.23744	0.212	0.407	0.0316775	Mcm2	N0	Down	Spleen
1.37365e-06	-1.29382	0.192	0.385	0.0335556	Srrt	N0	Down	Spleen
1.37471e-06	-1.53579	0.135	0.308	0.0335815	Mxd3	N0	Down	Spleen
1.39006e-06	-1.22687	0.184	0.374	0.0339565	Cdc123	N0	Down	Spleen
1.4194e-06	-1.65609	0.115	0.275	0.034673	Iscu	N0	Down	Spleen
1.44977e-06	-1.37264	0.125	0.297	0.035415	Sec13	N0	Down	Spleen
1.50983e-06	-1.59054	0.144	0.319	0.036882	Fzr1	N0	Down	Spleen
1.55727e-06	-1.11468	0.281	0.473	0.0380411	Elavl1	N0	Down	Spleen
1.59049e-06	-1.42355	0.157	0.341	0.0388525	Xrn2	N0	Down	Spleen
1.61119e-06	-1.58294	0.135	0.308	0.0393582	Esyt1	N0	Down	Spleen
1.75073e-06	-1.21108	0.244	0.429	0.0427668	Fkbp8	N0	Down	Spleen
1.76462e-06	-1.21017	0.146	0.33	0.0431061	Btg2	N0	Down	Spleen
1.39943e-06	-1.00236	0.89	0.906	0.0341853	Pkm	N1	Down	Spleen
1.8576e-06	-1.10454	0.995	1	0.0453773	mt-Co1	N1	Down	Spleen
9.8469e-10	-1.1516	0.855	0.969	2.4054e-05	B2m	N1	Down	Spleen
2.18855e-14	-1.15346	0.916	1	5.3462e-10	Arpc1b	N1	Down	Spleen
5.87498e-15	-1.16264	0.999	1	1.43514e-10	Pglyrp1	N1	Down	Spleen
1.91927e-07	-1.1742	0.798	0.906	0.0046884	H2-D1	N1	Down	Spleen
2.68023e-12	-1.26093	0.99	0.969	6.54726e-08	Gapdh	N1	Down	Spleen
2.87346e-10	-1.26938	0.984	0.969	7.01929e-06	Ftl1	N1	Down	Spleen
1.68339e-07	-1.39534	0.607	0.875	0.00411219	Tln1	N1	Down	Spleen
7.0962e-08	-1.50018	0.947	1	0.00173346	Gpx1	N1	Down	Spleen
1.78489e-08	-1.52821	0.484	0.781	0.000436013	Gpx4	N1	Down	Spleen
3.35737e-07	-1.53991	0.578	0.812	0.00820139	Rhog	N1	Down	Spleen
8.91724e-12	-1.57685	0.618	0.906	2.1783e-07	Limd2	N1	Down	Spleen
6.17095e-07	-1.61819	0.262	0.594	0.0150744	Marcksl1	N1	Down	Spleen
6.3442e-07	-1.6533	0.329	0.656	0.0154976	Ier2	N1	Down	Spleen
2.89547e-12	-1.8686	0.636	0.906	7.07306e-08	Cnn2	N1	Down	Spleen
2.17996e-14	-1.9127	0.64	0.938	5.32521e-10	Ccnd3	N1	Down	Spleen
7.69313e-12	-2.06434	0.368	0.844	1.87928e-07	Hnrnpa2b1	N1	Down	Spleen
9.06692e-14	-2.59281	0.367	0.844	2.21487e-09	Eno1	N1	Down	Spleen
2.57846e-09	-2.91415	0.547	0.812	6.29865e-05	Uba52	N1	Down	Spleen
4.96206e-16	-3.28153	0.105	0.531	1.21213e-11	Tsc22d3	N1	Down	Spleen
2.86265e-10	-3.80582	0.101	0.406	6.99289e-06	Rpl10-ps3	N1	Down	Spleen
4.10973e-15	-3.84094	0.201	0.656	1.00392e-10	Gm10076	N1	Down	Spleen
1.04518e-25	-4.44402	0.145	0.719	2.55316e-21	Rpl9-ps6	N1	Down	Spleen
1.78698e-20	-1.00832	0.661	0.856	4.36524e-16	Ypel3	N2	Down	Spleen
5.53613e-07	-1.01711	0.279	0.413	0.0135236	Gdi2	N2	Down	Spleen
2.02449e-07	-1.02524	0.303	0.447	0.00494542	Sf3b2	N2	Down	Spleen
7.53523e-10	-1.02599	0.255	0.447	1.84071e-05	Tagln2	N2	Down	Spleen
8.53518e-47	-1.03127	0.981	1	2.08497e-42	H2-D1	N2	Down	Spleen
2.45783e-08	-1.03992	0.169	0.317	0.000600399	Eif3a	N2	Down	Spleen
2.58646e-10	-1.05786	0.324	0.505	6.31821e-06	Hnrnpu	N2	Down	Spleen
1.16546e-10	-1.06503	0.275	0.466	2.84698e-06	Ppib	N2	Down	Spleen
4.31563e-09	-1.06725	0.168	0.327	0.000105422	Ctss	N2	Down	Spleen
9.40767e-07	-1.07616	0.203	0.332	0.022981	Git2	N2	Down	Spleen
7.42485e-08	-1.07782	0.418	0.534	0.00181374	Cdc42se1	N2	Down	Spleen
2.4368e-32	-1.08876	0.725	0.99	5.95262e-28	Atp5e	N2	Down	Spleen
2.02502e-09	-1.10418	0.307	0.462	4.94672e-05	Ndufa3	N2	Down	Spleen
2.99908e-09	-1.10745	0.342	0.486	7.32615e-05	Unc93b1	N2	Down	Spleen
1.84572e-06	-1.10828	0.283	0.394	0.0450874	Cyth4	N2	Down	Spleen
1.85518e-10	-1.119	0.385	0.538	4.53183e-06	Tpm4	N2	Down	Spleen
9.5875e-17	-1.12101	0.549	0.716	2.34204e-12	Serp1	N2	Down	Spleen
1.3219e-15	-1.12588	0.388	0.611	3.22914e-11	Ndufa13	N2	Down	Spleen
3.95585e-07	-1.12741	0.128	0.25	0.00966334	Lsm4	N2	Down	Spleen
3.3112e-55	-1.13013	0.919	0.995	8.0886e-51	Rps21	N2	Down	Spleen
2.03317e-08	-1.13949	0.112	0.24	0.000496663	Etnk1	N2	Down	Spleen
6.59322e-31	-1.14038	0.7	0.962	1.61059e-26	Laptm5	N2	Down	Spleen
1.1687e-08	-1.14358	0.147	0.288	0.000285489	Nap1l1	N2	Down	Spleen
1.67785e-09	-1.14464	0.401	0.524	4.09865e-05	Cd300ld	N2	Down	Spleen
2.20781e-13	-1.14536	0.349	0.562	5.39324e-09	H2-T23	N2	Down	Spleen
1.08041e-27	-1.14684	0.815	0.938	2.63924e-23	Junb	N2	Down	Spleen
1.53056e-54	-1.14972	0.961	0.99	3.73886e-50	Rpl34	N2	Down	Spleen
3.10225e-17	-1.15052	0.451	0.697	7.57817e-13	Myl12a	N2	Down	Spleen
2.76952e-13	-1.15642	0.393	0.611	6.76539e-09	Ldha	N2	Down	Spleen
5.24929e-08	-1.15802	0.101	0.221	0.0012823	Snrpd2	N2	Down	Spleen
9.01524e-28	-1.17051	0.714	0.88	2.20224e-23	Zfp36	N2	Down	Spleen
5.47652e-10	-1.18027	0.328	0.5	1.3378e-05	Arl6ip1	N2	Down	Spleen
7.45863e-13	-1.1848	0.295	0.51	1.822e-08	Eif4g2	N2	Down	Spleen
8.64508e-28	-1.18612	0.434	0.812	2.11182e-23	Rbm3	N2	Down	Spleen
2.11227e-43	-1.1871	0.8	0.995	5.15985e-39	Oaz1	N2	Down	Spleen
3.96088e-09	-1.18728	0.378	0.514	9.67564e-05	H2-Q10	N2	Down	Spleen
1.663e-07	-1.19773	0.109	0.226	0.00406238	Ywhaq	N2	Down	Spleen
3.89025e-32	-1.20464	0.76	0.894	9.50309e-28	Dusp1	N2	Down	Spleen
1.11491e-18	-1.21169	0.519	0.683	2.7235e-14	Ptpn6	N2	Down	Spleen
6.62461e-33	-1.21237	0.482	0.875	1.61826e-28	Hnrnpf	N2	Down	Spleen
4.48795e-60	-1.21499	0.926	0.995	1.09632e-55	Rps14	N2	Down	Spleen
3.47475e-30	-1.21619	0.476	0.861	8.48813e-26	Pcbp2	N2	Down	Spleen
1.79258e-61	-1.2354	0.288	0.798	4.37891e-57	Ighm	N2	Down	Spleen
2.0637e-51	-1.23819	0.648	0.986	5.0412e-47	Ptma	N2	Down	Spleen
1.45957e-25	-1.23881	0.328	0.678	3.56545e-21	Hnrnpa3	N2	Down	Spleen
3.31555e-08	-1.24041	0.22	0.365	0.000809921	Midn	N2	Down	Spleen
9.29771e-59	-1.24357	0.948	0.995	2.27125e-54	Rpl30	N2	Down	Spleen
3.68568e-17	-1.24391	0.343	0.606	9.00339e-13	Arhgef1	N2	Down	Spleen
1.61762e-59	-1.24986	0.865	0.995	3.95153e-55	Rps23	N2	Down	Spleen
2.41612e-14	-1.25039	0.487	0.644	5.9021e-10	Cebpd	N2	Down	Spleen
3.63534e-08	-1.25231	0.208	0.351	0.000888041	Ddx17	N2	Down	Spleen
2.45382e-56	-1.2564	0.924	1	5.9942e-52	B2m	N2	Down	Spleen
1.40463e-20	-1.25969	0.371	0.663	3.43124e-16	Atp5j2	N2	Down	Spleen
6.71023e-10	-1.26329	0.145	0.298	1.63918e-05	Mtdh	N2	Down	Spleen
1.68793e-06	-1.2748	0.272	0.375	0.0412328	Adrb2	N2	Down	Spleen
1.26197e-14	-1.27483	0.276	0.49	3.08273e-10	Arhgdia	N2	Down	Spleen
2.52257e-10	-1.27514	0.278	0.438	6.16212e-06	Rp9	N2	Down	Spleen
1.66546e-38	-1.28267	0.571	0.962	4.06838e-34	Ltb	N2	Down	Spleen
2.10621e-11	-1.29337	0.199	0.38	5.14504e-07	Csk	N2	Down	Spleen
2.2205e-14	-1.29523	0.247	0.471	5.42424e-10	Slc25a5	N2	Down	Spleen
4.01039e-48	-1.2981	0.993	1	9.79657e-44	Ftl1	N2	Down	Spleen
1.47803e-08	-1.29943	0.152	0.288	0.000361054	Sipa1	N2	Down	Spleen
4.29526e-09	-1.29955	0.192	0.341	0.000104925	Stat1	N2	Down	Spleen
4.11418e-65	-1.30184	0.958	1	1.00501e-60	Rpl23	N2	Down	Spleen
2.31627e-15	-1.30655	0.44	0.63	5.65818e-11	Gpx4	N2	Down	Spleen
9.13856e-09	-1.31094	0.221	0.361	0.000223237	Ppp1cc	N2	Down	Spleen
2.56951e-08	-1.32023	0.13	0.26	0.000627679	Ssr4	N2	Down	Spleen
1.06447e-10	-1.33292	0.383	0.553	2.60029e-06	Klf3	N2	Down	Spleen
3.74778e-62	-1.33562	0.867	0.995	9.15508e-58	Rpl39	N2	Down	Spleen
4.05487e-19	-1.34056	0.477	0.663	9.90523e-15	Grk2	N2	Down	Spleen
9.87216e-30	-1.34334	0.31	0.678	2.41157e-25	Dynll1	N2	Down	Spleen
3.9673e-17	-1.34661	0.481	0.659	9.69133e-13	Fgl2	N2	Down	Spleen
9.75103e-08	-1.35078	0.21	0.341	0.00238198	Oasl2	N2	Down	Spleen
3.48591e-40	-1.35732	0.747	0.962	8.51539e-36	Gpx1	N2	Down	Spleen
9.59777e-22	-1.36075	0.199	0.476	2.34454e-17	Snrpe	N2	Down	Spleen
2.53734e-07	-1.37983	0.112	0.226	0.00619822	Park7	N2	Down	Spleen
1.28437e-07	-1.39599	0.107	0.221	0.00313746	Rtraf	N2	Down	Spleen
2.74236e-19	-1.40326	0.278	0.534	6.69905e-15	Ndufa6	N2	Down	Spleen
2.60541e-14	-1.40531	0.323	0.514	6.3645e-10	Tln1	N2	Down	Spleen
4.15139e-07	-1.41206	0.179	0.298	0.010141	Rnf44	N2	Down	Spleen
5.90038e-09	-1.41211	0.104	0.231	0.000144134	Eif3m	N2	Down	Spleen
9.39581e-30	-1.42001	0.319	0.688	2.29521e-25	Dnaja1	N2	Down	Spleen
1.65328e-69	-1.42336	0.956	0.995	4.03862e-65	Rps10	N2	Down	Spleen
1.81613e-68	-1.42534	0.836	0.995	4.43643e-64	Rpl26	N2	Down	Spleen
9.0746e-09	-1.44282	0.172	0.317	0.000221674	Gngt2	N2	Down	Spleen
1.30505e-12	-1.44634	0.298	0.466	3.18799e-08	Pbxip1	N2	Down	Spleen
1.38977e-08	-1.44656	0.229	0.361	0.000339492	1600010M07Rik	N2	Down	Spleen
1.12215e-07	-1.44757	0.241	0.37	0.0027412	Sbno2	N2	Down	Spleen
1.92606e-25	-1.46072	0.65	0.755	4.70499e-21	Cxcr2	N2	Down	Spleen
4.40133e-14	-1.47127	0.153	0.341	1.07516e-09	Snrpb	N2	Down	Spleen
5.95683e-08	-1.47352	0.131	0.255	0.00145513	G3bp2	N2	Down	Spleen
1.09808e-07	-1.47772	0.154	0.279	0.00268239	Rgs19	N2	Down	Spleen
9.12374e-20	-1.48125	0.479	0.659	2.22875e-15	Rhog	N2	Down	Spleen
1.45681e-13	-1.48374	0.155	0.341	3.55871e-09	Tpr	N2	Down	Spleen
3.84343e-64	-1.48876	0.912	0.995	9.38872e-60	Rps15a	N2	Down	Spleen
5.13227e-15	-1.49304	0.111	0.293	1.25371e-10	Anp32b	N2	Down	Spleen
1.76576e-11	-1.49608	0.171	0.341	4.31339e-07	Tgfb1	N2	Down	Spleen
2.52564e-68	-1.4973	0.766	0.986	6.16963e-64	Rps28	N2	Down	Spleen
7.20439e-15	-1.4998	0.217	0.428	1.75989e-10	Atp5c1	N2	Down	Spleen
1.55571e-29	-1.50391	0.312	0.663	3.80028e-25	Cox7a2l	N2	Down	Spleen
1.22191e-68	-1.50594	0.711	0.986	2.98488e-64	Rps18	N2	Down	Spleen
2.07768e-51	-1.50698	0.529	0.966	5.07534e-47	Ucp2	N2	Down	Spleen
1.16133e-17	-1.50714	0.3	0.524	2.83689e-13	Tmem50a	N2	Down	Spleen
6.81022e-69	-1.5124	0.806	0.99	1.6636e-64	Rpl38	N2	Down	Spleen
1.49674e-11	-1.51536	0.102	0.245	3.65624e-07	Vcp	N2	Down	Spleen
2.59337e-12	-1.52213	0.267	0.433	6.33509e-08	Man2b1	N2	Down	Spleen
7.91359e-29	-1.53054	0.435	0.707	1.93313e-24	Ppp1r18	N2	Down	Spleen
6.00942e-11	-1.53634	0.103	0.245	1.46798e-06	Lbh	N2	Down	Spleen
3.89551e-43	-1.53666	0.437	0.861	9.51595e-39	Ppp1ca	N2	Down	Spleen
2.08217e-70	-1.53956	0.932	0.995	5.08634e-66	Rpl18a	N2	Down	Spleen
1.74848e-57	-1.55665	0.732	0.986	4.27119e-53	Arpc1b	N2	Down	Spleen
4.54783e-11	-1.5568	0.175	0.332	1.11094e-06	Nisch	N2	Down	Spleen
6.99288e-68	-1.56264	0.698	0.986	1.70822e-63	Rpl22	N2	Down	Spleen
1.401e-60	-1.56888	0.78	0.981	3.42237e-56	Rpl24	N2	Down	Spleen
1.986e-08	-1.58135	0.138	0.264	0.00048514	Plekhj1	N2	Down	Spleen
9.37289e-75	-1.5921	0.853	1	2.28961e-70	Rplp2	N2	Down	Spleen
1.13129e-24	-1.59459	0.199	0.49	2.76351e-20	Npc2	N2	Down	Spleen
2.85432e-09	-1.59669	0.106	0.236	6.97254e-05	Hnrnpab	N2	Down	Spleen
1.4649e-16	-1.60127	0.119	0.312	3.57845e-12	Calr	N2	Down	Spleen
1.70755e-48	-1.61109	0.398	0.899	4.1712e-44	Cd37	N2	Down	Spleen
1.5078e-06	-1.61292	0.103	0.202	0.0368325	Ndufb4	N2	Down	Spleen
7.53786e-16	-1.61326	0.248	0.457	1.84135e-11	Creg1	N2	Down	Spleen
3.73658e-17	-1.61383	0.269	0.49	9.12773e-13	Emp3	N2	Down	Spleen
4.25628e-14	-1.62078	0.247	0.433	1.03972e-09	Jaml	N2	Down	Spleen
1.09744e-83	-1.62188	0.883	0.995	2.68083e-79	Rps12	N2	Down	Spleen
6.17771e-24	-1.62986	0.223	0.505	1.50909e-19	Pcbp1	N2	Down	Spleen
1.25887e-07	-1.63727	0.127	0.245	0.00307518	Xbp1	N2	Down	Spleen
5.23109e-19	-1.6395	0.117	0.327	1.27785e-14	Dad1	N2	Down	Spleen
2.30944e-09	-1.64308	0.152	0.288	5.64149e-05	Raly	N2	Down	Spleen
1.02255e-25	-1.65548	0.666	0.822	2.49789e-21	Ccl6	N2	Down	Spleen
8.58342e-73	-1.6561	0.915	1	2.09676e-68	mt-Co2	N2	Down	Spleen
1.10722e-50	-1.65762	0.452	0.889	2.70471e-46	Arhgap45	N2	Down	Spleen
6.2128e-15	-1.65949	0.117	0.298	1.51766e-10	Hnrnpa1	N2	Down	Spleen
9.97386e-11	-1.66179	0.104	0.24	2.43642e-06	Zbtb7a	N2	Down	Spleen
2.57432e-28	-1.6698	0.242	0.548	6.28856e-24	Cox6a1	N2	Down	Spleen
6.84823e-09	-1.67245	0.124	0.25	0.000167289	Prrc2a	N2	Down	Spleen
1.62004e-08	-1.67289	0.103	0.221	0.000395743	Aup1	N2	Down	Spleen
1.25085e-08	-1.67907	0.126	0.245	0.000305559	Psmb5	N2	Down	Spleen
6.70359e-76	-1.69152	0.865	0.995	1.63755e-71	Rps3	N2	Down	Spleen
6.2176e-84	-1.69181	0.959	0.995	1.51884e-79	Rps16	N2	Down	Spleen
2.2913e-26	-1.69568	0.111	0.365	5.5972e-22	Set	N2	Down	Spleen
1.30458e-70	-1.70133	0.536	0.976	3.18683e-66	Eef1b2	N2	Down	Spleen
1.685e-46	-1.71426	0.291	0.736	4.11612e-42	Ybx1	N2	Down	Spleen
3.30553e-17	-1.71961	0.176	0.394	8.07474e-13	Tmem234	N2	Down	Spleen
5.59821e-78	-1.72012	0.831	0.995	1.36753e-73	Rpl11	N2	Down	Spleen
2.19943e-07	-1.72034	0.115	0.221	0.00537277	Ap2m1	N2	Down	Spleen
1.82812e-21	-1.73245	0.16	0.409	4.46572e-17	Atp5a1	N2	Down	Spleen
2.24997e-77	-1.74428	0.913	1	5.49623e-73	mt-Co3	N2	Down	Spleen
2.0641e-07	-1.75316	0.131	0.24	0.00504218	Tnfaip8l2	N2	Down	Spleen
1.02446e-55	-1.7564	0.529	0.938	2.50256e-51	mt-Nd4	N2	Down	Spleen
2.76088e-59	-1.75791	0.268	0.784	6.74429e-55	Gnas	N2	Down	Spleen
1.74131e-85	-1.76246	0.866	0.995	4.25367e-81	Rplp1	N2	Down	Spleen
1.12481e-76	-1.76489	0.725	0.995	2.74769e-72	Rpl36	N2	Down	Spleen
3.52453e-62	-1.77545	0.504	0.986	8.60972e-58	Naca	N2	Down	Spleen
2.71756e-79	-1.77693	0.968	0.995	6.63847e-75	Rps24	N2	Down	Spleen
3.25083e-77	-1.77697	0.309	0.923	7.94112e-73	Rpl22l1	N2	Down	Spleen
2.78629e-44	-1.78728	0.259	0.683	6.80635e-40	Eif3k	N2	Down	Spleen
8.87528e-32	-1.78861	0.19	0.51	2.16805e-27	Atp5b	N2	Down	Spleen
1.85916e-57	-1.80615	0.244	0.745	4.54156e-53	Sumo2	N2	Down	Spleen
1.19549e-11	-1.80769	0.207	0.361	2.92035e-07	Ywhah	N2	Down	Spleen
3.02642e-50	-1.81197	0.312	0.774	7.39293e-46	Grcc10	N2	Down	Spleen
3.8638e-80	-1.81544	0.738	1	9.43848e-76	mt-Cytb	N2	Down	Spleen
9.92537e-79	-1.81771	0.758	0.99	2.42457e-74	Rps2	N2	Down	Spleen
8.85994e-85	-1.81905	0.764	0.99	2.16431e-80	Rpl7	N2	Down	Spleen
3.24857e-55	-1.82622	0.291	0.774	7.93561e-51	Slc25a3	N2	Down	Spleen
4.98876e-32	-1.82644	0.497	0.745	1.21865e-27	Psap	N2	Down	Spleen
4.56522e-76	-1.82955	0.27	0.875	1.11519e-71	H2-Eb1	N2	Down	Spleen
7.58241e-16	-1.84562	0.151	0.346	1.85223e-11	Tbc1d10c	N2	Down	Spleen
8.91092e-34	-1.84872	0.141	0.457	2.17676e-29	Hint1	N2	Down	Spleen
1.58852e-60	-1.85026	0.384	0.889	3.88044e-56	Zfp36l2	N2	Down	Spleen
6.19094e-72	-1.85144	0.323	0.885	1.51232e-67	Rpl31	N2	Down	Spleen
3.01084e-88	-1.85258	0.718	1	7.35488e-84	H2-K1	N2	Down	Spleen
2.51412e-85	-1.86173	0.851	0.995	6.1415e-81	Rps11	N2	Down	Spleen
9.66291e-19	-1.86354	0.116	0.317	2.36045e-14	Hsp90b1	N2	Down	Spleen
6.54319e-26	-1.86766	0.123	0.37	1.59837e-21	Jpt1	N2	Down	Spleen
2.2402e-75	-1.86822	0.245	0.837	5.47236e-71	H2-Ab1	N2	Down	Spleen
1.42308e-84	-1.87243	0.876	0.995	3.4763e-80	Rps3a1	N2	Down	Spleen
3.22208e-70	-1.87824	0.337	0.885	7.8709e-66	Rps17	N2	Down	Spleen
3.67842e-82	-1.87841	0.824	0.995	8.98564e-78	Rpl18	N2	Down	Spleen
1.12843e-81	-1.87854	0.873	0.995	2.75653e-77	Rpl13	N2	Down	Spleen
5.77963e-10	-1.8886	0.111	0.24	1.41185e-05	Slc25a11	N2	Down	Spleen
1.83241e-81	-1.90172	0.783	0.99	4.4762e-77	Rps26	N2	Down	Spleen
1.10953e-55	-1.91459	0.212	0.683	2.71037e-51	Cnbp	N2	Down	Spleen
6.76002e-60	-1.92715	0.321	0.837	1.65134e-55	Eif5a	N2	Down	Spleen
4.18213e-69	-1.93208	0.382	0.923	1.02161e-64	Ptpn18	N2	Down	Spleen
3.22761e-82	-1.93324	0.671	0.995	7.8844e-78	Rpl15	N2	Down	Spleen
2.78099e-86	-1.9356	0.816	0.99	6.79339e-82	Rpl28	N2	Down	Spleen
1.03486e-84	-1.93668	0.778	0.995	2.52797e-80	Rps19	N2	Down	Spleen
6.46566e-84	-1.94128	0.769	0.99	1.57943e-79	Rpl8	N2	Down	Spleen
1.21796e-85	-1.94701	0.777	0.995	2.97524e-81	Rpl32	N2	Down	Spleen
7.3797e-19	-1.95215	0.198	0.409	1.80271e-14	AI467606	N2	Down	Spleen
5.31921e-82	-1.96836	0.804	0.995	1.29938e-77	Rps20	N2	Down	Spleen
9.16754e-85	-1.9796	0.519	0.971	2.23945e-80	Rpl36a	N2	Down	Spleen
3.99752e-43	-1.99047	0.197	0.577	9.76515e-39	Atp5d	N2	Down	Spleen
9.64553e-88	-1.99574	0.943	1	2.35621e-83	mt-Co1	N2	Down	Spleen
1.03013e-83	-1.99676	0.844	0.995	2.51639e-79	Rps7	N2	Down	Spleen
2.10205e-82	-2.00275	0.372	0.971	5.13489e-78	Shisa5	N2	Down	Spleen
1.5516e-90	-2.01136	0.85	0.995	3.79025e-86	Rpl19	N2	Down	Spleen
7.18967e-39	-2.0184	0.394	0.712	1.75629e-34	Ier2	N2	Down	Spleen
5.83508e-87	-2.01967	0.54	0.976	1.42539e-82	Rps6	N2	Down	Spleen
8.73806e-34	-2.04229	0.113	0.399	2.13453e-29	Apobec3	N2	Down	Spleen
1.84641e-67	-2.06092	0.186	0.678	4.51041e-63	Nsa2	N2	Down	Spleen
2.70962e-76	-2.06448	0.253	0.822	6.61905e-72	Psmb8	N2	Down	Spleen
1.40786e-93	-2.07888	0.456	0.99	3.43912e-89	Rpl7a	N2	Down	Spleen
5.59137e-89	-2.08657	0.295	0.933	1.36586e-84	H2-Aa	N2	Down	Spleen
2.21603e-35	-2.10138	0.106	0.389	5.41332e-31	Eif3e	N2	Down	Spleen
5.95148e-53	-2.10423	0.165	0.577	1.45383e-48	Serbp1	N2	Down	Spleen
9.8755e-86	-2.15138	0.414	0.976	2.41239e-81	Pabpc1	N2	Down	Spleen
1.49844e-94	-2.15385	0.802	0.995	3.66039e-90	Rplp0	N2	Down	Spleen
1.1377e-97	-2.15581	0.488	0.986	2.77917e-93	Rack1	N2	Down	Spleen
1.15733e-89	-2.15936	0.746	0.99	2.82713e-85	Rps5	N2	Down	Spleen
4.30749e-97	-2.16167	0.297	0.933	1.05223e-92	Rpl36al	N2	Down	Spleen
2.5353e-18	-2.17493	0.111	0.308	6.19323e-14	mt-Nd3	N2	Down	Spleen
3.39758e-95	-2.17901	0.54	0.981	8.2996e-91	Rpl12	N2	Down	Spleen
1.80533e-97	-2.19162	0.508	0.995	4.41005e-93	Hspa8	N2	Down	Spleen
2.58794e-36	-2.19725	0.14	0.447	6.32182e-32	Zfp706	N2	Down	Spleen
2.91031e-30	-2.20417	0.162	0.442	7.10931e-26	Psme2	N2	Down	Spleen
2.68407e-78	-2.22026	0.38	0.894	6.55665e-74	Rsrp1	N2	Down	Spleen
1.65105e-86	-2.23419	0.586	0.99	4.03318e-82	Rpl29	N2	Down	Spleen
6.63484e-97	-2.23714	0.458	0.99	1.62076e-92	Rps15	N2	Down	Spleen
1.71896e-97	-2.24733	0.285	0.923	4.19908e-93	Hnrnpa2b1	N2	Down	Spleen
1.31763e-83	-2.24861	0.353	0.909	3.21872e-79	Cnn2	N2	Down	Spleen
5.00697e-109	-2.28516	0.124	0.716	1.2231e-104	Ly6d	N2	Down	Spleen
4.32344e-98	-2.31699	0.367	0.971	1.05613e-93	Rpl23a	N2	Down	Spleen
5.31132e-79	-2.32116	0.196	0.712	1.29745e-74	Psme1	N2	Down	Spleen
9.9724e-124	-2.32937	0.219	0.933	2.43606e-119	Npm1	N2	Down	Spleen
2.06569e-96	-2.33426	0.806	1	5.04607e-92	Rps8	N2	Down	Spleen
1.11646e-93	-2.33492	0.778	0.995	2.72729e-89	Rps4x	N2	Down	Spleen
8.79673e-83	-2.3359	0.175	0.702	2.14886e-78	Eif3h	N2	Down	Spleen
1.16258e-101	-2.33617	0.51	0.986	2.83996e-97	Rpl3	N2	Down	Spleen
4.88559e-107	-2.33883	0.448	0.995	1.19345e-102	Rpl14	N2	Down	Spleen
1.22317e-78	-2.3624	0.14	0.63	2.98796e-74	Eef1d	N2	Down	Spleen
8.7835e-16	-2.41913	0.332	0.572	2.14563e-11	Lars2	N2	Down	Spleen
9.96492e-105	-2.42059	0.642	0.995	2.43423e-100	Rpl6	N2	Down	Spleen
8.42594e-97	-2.42064	0.443	0.981	2.05829e-92	Hsp90ab1	N2	Down	Spleen
3.08261e-91	-2.44327	0.121	0.63	7.53021e-87	Hspe1	N2	Down	Spleen
8.6306e-98	-2.44586	0.289	0.928	2.10828e-93	Eif3f	N2	Down	Spleen
8.12264e-111	-2.46109	0.597	0.99	1.9842e-106	Rpl13a	N2	Down	Spleen
2.74501e-88	-2.48566	0.139	0.654	6.70552e-84	Eef1g	N2	Down	Spleen
7.55872e-104	-2.48953	0.503	0.99	1.84644e-99	Rpl10a	N2	Down	Spleen
4.4622e-99	-2.49654	0.599	0.995	1.09003e-94	Ppia	N2	Down	Spleen
1.7904e-48	-2.50217	0.107	0.438	4.37359e-44	Trmt112	N2	Down	Spleen
7.47122e-101	-2.50379	0.716	0.995	1.82507e-96	Rpsa	N2	Down	Spleen
1.26271e-108	-2.54048	0.843	0.995	3.08455e-104	Eef1a1	N2	Down	Spleen
1.84462e-111	-2.54666	0.108	0.668	4.50603e-107	Iglc2	N2	Down	Spleen
2.06296e-110	-2.54777	0.158	0.764	5.03939e-106	Atp5g2	N2	Down	Spleen
1.68563e-118	-2.55201	0.387	0.986	4.11767e-114	mt-Nd1	N2	Down	Spleen
1.34586e-120	-2.60893	0.339	0.971	3.28767e-116	Rpl5	N2	Down	Spleen
4.40743e-75	-2.69177	0.54	0.952	1.07665e-70	Cd74	N2	Down	Spleen
1.66066e-88	-2.77019	0.134	0.625	4.05666e-84	Atp5g3	N2	Down	Spleen
3.73533e-122	-2.77485	0.369	0.99	9.12467e-118	Ly6e	N2	Down	Spleen
5.34092e-102	-2.79243	0.734	0.995	1.30468e-97	Tmsb10	N2	Down	Spleen
1.12625e-113	-2.79556	0.183	0.837	2.75121e-109	Ifi27l2a	N2	Down	Spleen
2.06337e-157	-2.79819	0.127	0.827	5.0404e-153	Nme2	N2	Down	Spleen
5.09092e-70	-2.80773	0.197	0.644	1.24361e-65	Eno1	N2	Down	Spleen
7.65991e-142	-2.83312	0.254	0.957	1.87116e-137	Rpl4	N2	Down	Spleen
1.52876e-147	-2.84092	0.132	0.846	3.73444e-143	Cd79a	N2	Down	Spleen
3.81467e-110	-2.86236	0.348	0.962	9.31847e-106	Limd2	N2	Down	Spleen
2.16674e-144	-2.87832	0.281	0.986	5.29292e-140	Eef2	N2	Down	Spleen
1.56183e-75	-2.88834	0.275	0.74	3.81524e-71	Fos	N2	Down	Spleen
1.70071e-87	-2.92878	0.284	0.812	4.1545e-83	Tsc22d3	N2	Down	Spleen
4.04155e-182	-2.96356	0.142	0.909	9.8727e-178	mt-Nd5	N2	Down	Spleen
1.80643e-182	-3.12437	0.12	0.851	4.41275e-178	Crip1	N2	Down	Spleen
9.17088e-162	-3.17777	0.24	0.981	2.24026e-157	mt-Nd2	N2	Down	Spleen
2.34093e-128	-3.28252	0.435	0.995	5.71843e-124	Rpl35	N2	Down	Spleen
2.12493e-64	-3.88076	0.508	0.88	5.19077e-60	Uba52	N2	Down	Spleen
4.3805e-161	-4.69614	0.235	0.947	1.07007e-156	Gm10076	N2	Down	Spleen
5.88189e-146	-5.66973	0.129	0.712	1.43683e-141	Rpl9-ps6	N2	Down	Spleen
p_val	avg_log2FC	pct.1	pct.2	p_val_adj	gene	cluster	Type	Tissue
2.2256e-21	3.51971	0.821	0.276	5.4367e-17	Uba52	N0	Up	Lung
3.95846e-11	2.99086	0.537	0.15	9.66972e-07	Sik3	N0	Up	Lung
8.13349e-11	1.24966	0.94	0.898	1.98685e-06	Rps23	N0	Up	Lung
3.81369e-10	3.25403	0.493	0.134	9.31608e-06	Gm11808	N0	Up	Lung
5.78736e-10	2.0387	0.746	0.465	1.41374e-05	Dennd4a	N0	Up	Lung
7.71289e-10	2.47181	0.776	0.488	1.88411e-05	Srgn	N0	Up	Lung
1.25204e-09	3.28893	0.463	0.118	3.05849e-05	Morrbid	N0	Up	Lung
1.11503e-08	2.5288	0.522	0.213	0.000272379	Elmo1	N0	Up	Lung
1.59937e-08	1.56894	0.836	0.732	0.000390693	Rpl36	N0	Up	Lung
1.65361e-08	1.07199	0.97	0.984	0.000403945	Rps10	N0	Up	Lung
8.48939e-08	2.24909	0.478	0.189	0.00207379	Btbd9	N0	Up	Lung
1.39641e-07	2.23579	0.478	0.197	0.00341116	Cmip	N0	Up	Lung
3.2732e-07	2.98159	0.507	0.189	0.00799577	Cxcl2	N0	Up	Lung
1.41483e-06	2.30719	0.507	0.236	0.0345614	Sgms2	N0	Up	Lung
1.45346e-06	2.205	0.522	0.299	0.0355051	Mbnl2	N0	Up	Lung
1.68039e-89	3.06564	0.973	0.664	4.10486e-85	Antxr2	N1	Up	Lung
2.93622e-72	2.19696	0.963	0.694	7.1726e-68	Sgms2	N1	Up	Lung
3.06687e-68	1.94211	0.982	0.851	7.49176e-64	Cd44	N1	Up	Lung
5.88823e-66	1.62312	0.998	0.97	1.43838e-61	Srgn	N1	Up	Lung
1.24982e-64	3.64468	0.812	0.255	3.05306e-60	Xylt1	N1	Up	Lung
1.26644e-64	2.33848	0.914	0.574	3.09367e-60	Lyn	N1	Up	Lung
1.40582e-63	1.39434	0.993	0.94	3.43414e-59	Cd9	N1	Up	Lung
5.39795e-63	2.92621	0.852	0.37	1.31861e-58	Ripor2	N1	Up	Lung
1.18817e-61	1.97991	0.977	0.821	2.90247e-57	Ifitm2	N1	Up	Lung
3.50519e-61	1.53686	1	0.987	8.56247e-57	Fth1	N1	Up	Lung
6.72815e-61	2.76025	0.889	0.379	1.64355e-56	Nfkbia	N1	Up	Lung
1.18323e-58	1.6219	0.982	0.868	2.8904e-54	S100a6	N1	Up	Lung
5.07336e-57	1.72226	0.938	0.791	1.23932e-52	Tspo	N1	Up	Lung
1.13246e-56	2.72026	0.825	0.353	2.76637e-52	Nedd9	N1	Up	Lung
2.08902e-56	2.2458	0.93	0.528	5.10307e-52	Cxcl2	N1	Up	Lung
5.36955e-53	3.32204	0.734	0.221	1.31167e-48	Vav3	N1	Up	Lung
8.37e-53	1.53552	0.973	0.847	2.04462e-48	Cd14	N1	Up	Lung
4.719e-48	1.02897	0.993	0.991	1.15276e-43	Txn1	N1	Up	Lung
7.7476e-47	2.62816	0.838	0.609	1.89258e-42	Igf1r	N1	Up	Lung
1.47808e-45	2.33679	0.793	0.438	3.61064e-41	Baz2b	N1	Up	Lung
8.63753e-45	3.01831	0.714	0.281	2.10998e-40	Ptprj	N1	Up	Lung
2.94615e-44	1.21239	0.98	0.843	7.19685e-40	H2-D1	N1	Up	Lung
4.32918e-44	1.85451	0.839	0.579	1.05753e-39	App	N1	Up	Lung
1.8045e-43	2.67823	0.718	0.323	4.40804e-39	Pag1	N1	Up	Lung
2.2043e-43	2.49379	0.732	0.311	5.38466e-39	Cmip	N1	Up	Lung
3.70226e-43	2.94574	0.707	0.26	9.04387e-39	Pik3ap1	N1	Up	Lung
1.79075e-42	2.96944	0.671	0.2	4.37445e-38	Rnf149	N1	Up	Lung
6.22375e-41	2.08853	0.795	0.409	1.52034e-36	Entpd1	N1	Up	Lung
1.5984e-39	1.53266	0.909	0.591	3.90457e-35	Clec4d	N1	Up	Lung
2.79834e-39	3.72315	0.6	0.14	6.83578e-35	Fbxo11	N1	Up	Lung
3.57059e-38	3.03536	0.618	0.166	8.72224e-34	Sik3	N1	Up	Lung
9.80617e-38	2.21698	0.779	0.477	2.39545e-33	Btbd9	N1	Up	Lung
1.54151e-36	1.17274	0.943	0.868	3.76561e-32	Selenok	N1	Up	Lung
1.57889e-35	1.26075	0.909	0.732	3.85691e-31	Map1lc3b	N1	Up	Lung
4.07042e-35	1.88986	0.745	0.391	9.94323e-31	Smox	N1	Up	Lung
5.9487e-34	2.87372	0.586	0.166	1.45315e-29	Cdk17	N1	Up	Lung
7.79028e-34	3.01238	0.577	0.157	1.90301e-29	Irak2	N1	Up	Lung
1.52391e-33	3.39192	0.62	0.187	3.72261e-29	Ifitm1	N1	Up	Lung
4.13925e-33	2.31525	0.641	0.277	1.01114e-28	Elmo1	N1	Up	Lung
1.74423e-32	1.51796	0.832	0.634	4.2608e-28	Rab8b	N1	Up	Lung
4.08672e-32	3.01486	0.57	0.162	9.98303e-28	Pitpnc1	N1	Up	Lung
7.85696e-32	1.21645	0.914	0.745	1.9193e-27	Plek	N1	Up	Lung
2.56922e-31	3.04064	0.546	0.157	6.2761e-27	Susd6	N1	Up	Lung
6.69209e-31	2.72838	0.586	0.204	1.63474e-26	Mir142hg	N1	Up	Lung
2.23573e-30	1.86507	0.691	0.426	5.46143e-26	Mctp1	N1	Up	Lung
2.66305e-30	1.84866	0.686	0.353	6.50531e-26	Fpr1	N1	Up	Lung
1.76028e-29	2.8091	0.545	0.136	4.30001e-25	Pla2g7	N1	Up	Lung
2.00641e-29	1.14716	0.871	0.774	4.90125e-25	Mrpl33	N1	Up	Lung
3.05731e-28	3.08729	0.534	0.17	7.46839e-24	Morrbid	N1	Up	Lung
4.63944e-28	1.7532	0.743	0.498	1.13332e-23	Ralgapa1	N1	Up	Lung
6.29887e-28	2.4294	0.586	0.217	1.53869e-23	Il1rap	N1	Up	Lung
2.17206e-27	3.50251	0.479	0.102	5.30591e-23	Chst11	N1	Up	Lung
8.61306e-27	2.4238	0.573	0.255	2.104e-22	Esd	N1	Up	Lung
1.641e-26	2.42521	0.561	0.204	4.00863e-22	Cxcr4	N1	Up	Lung
2.86385e-26	2.71579	0.518	0.149	6.99581e-22	Gsap	N1	Up	Lung
5.02376e-26	2.74987	0.521	0.132	1.2272e-21	Ccl3	N1	Up	Lung
5.11477e-26	3.01819	0.484	0.123	1.24944e-21	Map3k5	N1	Up	Lung
9.40277e-26	1.94826	0.605	0.319	2.29691e-21	Zfand3	N1	Up	Lung
3.8854e-25	1.4746	0.718	0.447	9.49127e-21	Spag9	N1	Up	Lung
3.91027e-25	1.43395	0.795	0.617	9.55201e-21	Fam107b	N1	Up	Lung
6.70475e-24	2.12037	0.641	0.328	1.63784e-19	Zeb2	N1	Up	Lung
7.97254e-23	1.46546	0.688	0.426	1.94753e-18	Arg2	N1	Up	Lung
4.30748e-22	2.42615	0.527	0.209	1.05223e-17	Gk	N1	Up	Lung
6.33469e-22	2.41146	0.502	0.196	1.54744e-17	Zfp608	N1	Up	Lung
9.89907e-22	2.71524	0.457	0.132	2.41815e-17	Spata13	N1	Up	Lung
1.18515e-21	1.24194	0.754	0.643	2.89507e-17	Msra	N1	Up	Lung
3.52157e-21	1.62741	0.566	0.26	8.6025e-17	Emilin2	N1	Up	Lung
3.92366e-21	1.73286	0.604	0.336	9.58472e-17	Jmjd1c	N1	Up	Lung
4.83481e-21	2.93141	0.464	0.132	1.18105e-16	Asprv1	N1	Up	Lung
7.43613e-21	1.63431	0.588	0.345	1.8165e-16	Map2k4	N1	Up	Lung
1.63933e-20	2.53959	0.466	0.162	4.00457e-16	Upp1	N1	Up	Lung
2.66309e-20	1.65963	0.571	0.319	6.5054e-16	Ndfip1	N1	Up	Lung
2.70898e-20	2.47594	0.466	0.149	6.6175e-16	Olr1	N1	Up	Lung
4.25418e-20	1.4051	0.696	0.579	1.03921e-15	Cox17	N1	Up	Lung
7.07313e-20	1.84366	0.557	0.294	1.72783e-15	Hif1a	N1	Up	Lung
9.48667e-20	1.82165	0.546	0.264	2.3174e-15	Notch2	N1	Up	Lung
1.02578e-19	1.46875	0.589	0.362	2.50577e-15	Chmp4b	N1	Up	Lung
4.3561e-19	2.90254	0.436	0.149	1.06411e-14	Arid5b	N1	Up	Lung
6.77008e-19	1.92111	0.496	0.217	1.65379e-14	Fnip1	N1	Up	Lung
6.84802e-19	1.98333	0.532	0.277	1.67283e-14	Mbnl2	N1	Up	Lung
1.04327e-18	1.08359	0.761	0.609	2.5485e-14	Diaph1	N1	Up	Lung
2.604e-18	1.54363	0.637	0.438	6.36105e-14	Arhgap15	N1	Up	Lung
2.80137e-18	1.61922	0.62	0.4	6.84319e-14	F630028O10Rik	N1	Up	Lung
1.73335e-17	2.48792	0.457	0.187	4.23422e-13	Trps1	N1	Up	Lung
2.58239e-17	1.5104	0.637	0.498	6.30825e-13	Prkcb	N1	Up	Lung
2.70722e-17	1.25209	0.602	0.34	6.6132e-13	Cyth1	N1	Up	Lung
3.42749e-17	1.5927	0.584	0.417	8.37267e-13	Lpcat2	N1	Up	Lung
4.80996e-17	2.37009	0.425	0.157	1.17498e-12	Eea1	N1	Up	Lung
6.5404e-17	1.49449	0.58	0.362	1.59769e-12	Ehd1	N1	Up	Lung
9.73974e-17	2.43043	0.412	0.153	2.37922e-12	Fgd3	N1	Up	Lung
1.32527e-16	2.06703	0.457	0.209	3.23737e-12	Zswim6	N1	Up	Lung
1.38421e-16	1.56985	0.598	0.387	3.38136e-12	N4bp1	N1	Up	Lung
1.76822e-16	2.18852	0.409	0.153	4.31941e-12	Uba52	N1	Up	Lung
1.96516e-16	1.00004	0.825	0.609	4.80048e-12	Acod1	N1	Up	Lung
1.99331e-16	2.5191	0.414	0.17	4.86926e-12	Rps6ka2	N1	Up	Lung
2.70862e-16	2.36953	0.414	0.162	6.61663e-12	Sntb2	N1	Up	Lung
3.12326e-16	2.73611	0.438	0.196	7.6295e-12	Fmnl2	N1	Up	Lung
3.36212e-16	1.91429	0.498	0.277	8.213e-12	Sipa1l1	N1	Up	Lung
4.27376e-16	2.41039	0.411	0.153	1.04399e-11	Ptpn12	N1	Up	Lung
4.9293e-16	2.13733	0.45	0.209	1.20413e-11	Ptk2b	N1	Up	Lung
1.21278e-15	2.4883	0.384	0.14	2.96259e-11	Numb	N1	Up	Lung
1.59003e-15	1.93152	0.448	0.226	3.88412e-11	Inpp5d	N1	Up	Lung
3.96081e-15	1.33916	0.575	0.396	9.67546e-11	Syk	N1	Up	Lung
7.29497e-15	1.61379	0.498	0.243	1.78202e-10	Acvrl1	N1	Up	Lung
7.8736e-15	2.14054	0.402	0.123	1.92336e-10	Stfa2l1	N1	Up	Lung
3.36665e-14	2.01485	0.398	0.153	8.22405e-10	Slc11a1	N1	Up	Lung
4.41788e-14	1.25745	0.607	0.443	1.0792e-09	Rab11fip1	N1	Up	Lung
4.66872e-14	1.11938	0.689	0.613	1.14047e-09	Lims1	N1	Up	Lung
7.51203e-14	2.13925	0.346	0.119	1.83504e-09	Arrdc4	N1	Up	Lung
1.24198e-13	1.68736	0.429	0.209	3.03391e-09	Dusp6	N1	Up	Lung
1.3227e-13	1.11691	0.741	0.677	3.23108e-09	Lyst	N1	Up	Lung
1.983e-13	1.86301	0.43	0.234	4.84408e-09	Rab31	N1	Up	Lung
2.02528e-13	2.01805	0.373	0.149	4.94737e-09	Bcl2l1	N1	Up	Lung
3.05817e-13	1.91362	0.43	0.234	7.47049e-09	Cux1	N1	Up	Lung
3.13862e-13	1.7937	0.445	0.247	7.66701e-09	Klra2	N1	Up	Lung
4.61957e-13	1.61559	0.486	0.306	1.12847e-08	Chd7	N1	Up	Lung
5.01925e-13	2.03589	0.416	0.217	1.2261e-08	Rnf19a	N1	Up	Lung
5.01935e-13	1.15358	0.646	0.502	1.22613e-08	Akap13	N1	Up	Lung
6.12253e-13	1.82331	0.384	0.149	1.49561e-08	Ctsl	N1	Up	Lung
6.25805e-13	1.47295	0.489	0.323	1.52872e-08	Por	N1	Up	Lung
7.70482e-13	1.09039	0.657	0.506	1.88213e-08	Ell2	N1	Up	Lung
1.10747e-12	2.19039	0.359	0.123	2.70532e-08	Zfp36l1	N1	Up	Lung
1.30557e-12	1.29689	0.532	0.306	3.18925e-08	Nfe2l2	N1	Up	Lung
1.40235e-12	1.60427	0.421	0.2	3.42567e-08	Tnfrsf1b	N1	Up	Lung
1.41886e-12	1.84306	0.427	0.23	3.46599e-08	Erbin	N1	Up	Lung
1.51087e-12	1.81958	0.366	0.149	3.69076e-08	Sh2d3c	N1	Up	Lung
2.53384e-12	1.62986	0.438	0.209	6.18967e-08	Dusp16	N1	Up	Lung
2.73776e-12	1.49718	0.471	0.319	6.68779e-08	Clec5a	N1	Up	Lung
3.20653e-12	1.38099	0.541	0.362	7.83292e-08	Gm26740	N1	Up	Lung
6.21579e-12	1.59073	0.527	0.362	1.51839e-07	Cyp4f18	N1	Up	Lung
6.85575e-12	1.63967	0.475	0.319	1.67472e-07	Irak3	N1	Up	Lung
7.90693e-12	1.89148	0.432	0.247	1.93151e-07	Nfat5	N1	Up	Lung
1.22132e-11	2.03199	0.33	0.119	2.98344e-07	Gch1	N1	Up	Lung
1.25496e-11	1.44078	0.427	0.243	3.06561e-07	Wbp1l	N1	Up	Lung
2.35606e-11	1.26138	0.504	0.345	5.75538e-07	Fcho2	N1	Up	Lung
4.31171e-11	1.41765	0.464	0.268	1.05327e-06	Dmxl2	N1	Up	Lung
5.53722e-11	2.06207	0.302	0.111	1.35263e-06	Gm20406	N1	Up	Lung
7.51941e-11	1.94091	0.339	0.157	1.83684e-06	Anks1	N1	Up	Lung
1.08216e-10	2.23409	0.334	0.149	2.64349e-06	Kif13b	N1	Up	Lung
1.09373e-10	2.4076	0.302	0.106	2.67177e-06	Fndc3a	N1	Up	Lung
1.10859e-10	1.11425	0.514	0.374	2.70807e-06	Hectd1	N1	Up	Lung
3.54922e-10	1.08482	0.489	0.353	8.67003e-06	Lnpep	N1	Up	Lung
4.37676e-10	1.48015	0.382	0.191	1.06916e-05	Itpkb	N1	Up	Lung
4.97574e-10	1.56209	0.389	0.209	1.21547e-05	Pdlim5	N1	Up	Lung
9.54063e-10	1.37436	0.461	0.345	2.33059e-05	Mcu	N1	Up	Lung
1.28295e-09	1.12674	0.509	0.383	3.13399e-05	Tuba1c	N1	Up	Lung
1.58456e-09	1.02279	0.714	0.685	3.87077e-05	Pdcd6	N1	Up	Lung
1.95856e-09	1.88791	0.302	0.132	4.78438e-05	Sipa1l2	N1	Up	Lung
2.01866e-09	1.18132	0.48	0.366	4.93119e-05	Gng12	N1	Up	Lung
2.06891e-09	1.45213	0.355	0.166	5.05393e-05	Adrb2	N1	Up	Lung
2.59461e-09	1.46664	0.361	0.2	6.33812e-05	Gpat3	N1	Up	Lung
4.0764e-09	1.31703	0.452	0.336	9.95784e-05	Tbc1d8	N1	Up	Lung
4.29605e-09	1.99199	0.288	0.119	0.000104944	Pias1	N1	Up	Lung
4.5514e-09	1.78166	0.464	0.353	0.000111182	Dach1	N1	Up	Lung
5.46188e-09	1.33319	0.438	0.319	0.000133423	Lrrfip2	N1	Up	Lung
6.04814e-09	2.15717	0.309	0.145	0.000147744	Jak2	N1	Up	Lung
6.11938e-09	2.01783	0.314	0.149	0.000149484	Fas	N1	Up	Lung
6.25949e-09	1.25526	0.416	0.285	0.000152907	Carhsp1	N1	Up	Lung
6.48891e-09	1.68542	0.332	0.17	0.000158511	Tinf2	N1	Up	Lung
7.0892e-09	1.45527	0.486	0.345	0.000173175	Cstb	N1	Up	Lung
8.88342e-09	1.30234	0.388	0.247	0.000217004	Il17ra	N1	Up	Lung
9.56098e-09	1.41501	0.373	0.221	0.000233556	Noct	N1	Up	Lung
1.01142e-08	1.35547	0.496	0.374	0.000247069	Pmvk	N1	Up	Lung
1.44747e-08	2.23299	0.273	0.111	0.000353589	Rbm47	N1	Up	Lung
1.76333e-08	1.74137	0.307	0.145	0.000430747	Isg20	N1	Up	Lung
2.56318e-08	1.35447	0.354	0.196	0.000626134	Usp32	N1	Up	Lung
2.77204e-08	1.03799	0.471	0.387	0.000677153	Ccdc12	N1	Up	Lung
3.43215e-08	1.76679	0.28	0.128	0.000838406	Tlr13	N1	Up	Lung
3.49935e-08	1.87755	0.514	0.391	0.000854822	Spp1	N1	Up	Lung
4.20339e-08	1.85505	0.304	0.14	0.0010268	Id2	N1	Up	Lung
5.37661e-08	1.13791	0.438	0.302	0.0013134	Rnf19b	N1	Up	Lung
6.40136e-08	1.43936	0.366	0.243	0.00156372	Klhdc4	N1	Up	Lung
6.85183e-08	1.4309	0.368	0.217	0.00167377	Gfod1	N1	Up	Lung
7.25816e-08	1.21801	0.448	0.349	0.00177302	Abi1	N1	Up	Lung
7.42342e-08	1.22123	0.412	0.281	0.00181339	Lrrc8d	N1	Up	Lung
1.08962e-07	1.44147	0.38	0.268	0.00266171	Clasp1	N1	Up	Lung
1.31536e-07	2.02201	0.257	0.111	0.00321316	St3gal1	N1	Up	Lung
1.7317e-07	1.01661	0.445	0.332	0.00423021	Osbpl9	N1	Up	Lung
1.75373e-07	1.35026	0.446	0.362	0.00428402	Sema4d	N1	Up	Lung
1.78128e-07	1.66314	0.268	0.123	0.00435131	Blcap	N1	Up	Lung
1.85295e-07	1.57729	0.345	0.209	0.00452638	Iqgap2	N1	Up	Lung
1.98938e-07	1.00715	0.438	0.311	0.00485967	Nt5c2	N1	Up	Lung
2.21622e-07	1.55303	0.32	0.183	0.00541378	Tank	N1	Up	Lung
3.49081e-07	1.26525	0.368	0.251	0.00852734	Tmem38b	N1	Up	Lung
3.95803e-07	1.47019	0.296	0.166	0.00966866	Ifngr2	N1	Up	Lung
4.72772e-07	1.23681	0.373	0.272	0.0115489	Tmbim4	N1	Up	Lung
6.01388e-07	1.77503	0.261	0.132	0.0146907	Lmbrd1	N1	Up	Lung
6.10488e-07	1.4806	0.271	0.132	0.014913	Cdk13	N1	Up	Lung
7.34274e-07	1.33156	0.336	0.2	0.0179368	Casp4	N1	Up	Lung
7.57828e-07	1.88693	0.257	0.123	0.0185122	Uvrag	N1	Up	Lung
8.15059e-07	1.67825	0.312	0.191	0.0199103	Aff1	N1	Up	Lung
9.35e-07	1.60188	0.288	0.157	0.0228402	Plcl2	N1	Up	Lung
9.45989e-07	1.28861	0.343	0.226	0.0231086	Uhrf1bp1l	N1	Up	Lung
9.7666e-07	2.05754	0.236	0.106	0.0238578	Ralgapa2	N1	Up	Lung
1.00594e-06	1.76614	0.275	0.136	0.0245731	Hspa4l	N1	Up	Lung
1.08698e-06	1.09224	0.4	0.302	0.0265527	Ankrd22	N1	Up	Lung
1.18004e-06	1.32035	0.312	0.166	0.0288261	Nampt	N1	Up	Lung
0	5.53333	0.963	0.19	0	Alcam	N2	Up	Lung
0	4.6248	0.863	0.13	0	Ptprj	N2	Up	Lung
6.20679e-284	3.76773	0.655	0.121	1.5162e-279	Arid5b	N2	Up	Lung
0	3.63118	0.761	0.153	0	Fndc3b	N2	Up	Lung
6.31395e-297	3.62715	0.673	0.132	1.54237e-292	Lims1	N2	Up	Lung
3.86632e-261	3.5893	0.627	0.123	9.44464e-257	Zfp608	N2	Up	Lung
0	3.58883	0.775	0.184	0	Chst11	N2	Up	Lung
8.9849e-247	3.5333	0.613	0.128	2.19483e-242	Arhgap26	N2	Up	Lung
0	3.46178	0.991	0.556	0	Antxr2	N2	Up	Lung
4.28972e-186	3.34134	0.534	0.117	1.04789e-181	Pitpnc1	N2	Up	Lung
9.15103e-271	3.31996	0.651	0.136	2.23541e-266	Spata13	N2	Up	Lung
0	3.31744	0.956	0.402	0	Xylt1	N2	Up	Lung
0	3.2186	0.804	0.252	0	Fbxo11	N2	Up	Lung
0	3.10722	0.805	0.216	0	Irak2	N2	Up	Lung
1.97241e-201	3.08334	0.571	0.132	4.81821e-197	Eea1	N2	Up	Lung
0	3.06494	0.727	0.192	0	Sik3	N2	Up	Lung
9.30968e-200	3.0123	0.586	0.179	2.27417e-195	Mctp1	N2	Up	Lung
2.5231e-302	3.01158	0.714	0.18	6.16343e-298	Gsap	N2	Up	Lung
7.46406e-265	2.98628	0.688	0.175	1.82332e-260	Ccl3	N2	Up	Lung
1.13814e-130	2.98529	0.442	0.108	2.78026e-126	Vav3	N2	Up	Lung
4.19392e-185	2.97035	0.546	0.133	1.02449e-180	Rbpj	N2	Up	Lung
1.16611e-205	2.92384	0.573	0.138	2.84857e-201	Fgd3	N2	Up	Lung
4.94877e-189	2.88905	0.553	0.131	1.20889e-184	Cass4	N2	Up	Lung
1.58025e-302	2.85562	0.731	0.226	3.86023e-298	Cdk17	N2	Up	Lung
4.35524e-94	2.84501	0.42	0.154	1.0639e-89	Dock10	N2	Up	Lung
7.71043e-159	2.81223	0.497	0.125	1.8835e-154	Clec5a	N2	Up	Lung
0	2.80988	0.964	0.576	0	Wfdc17	N2	Up	Lung
3.3684e-185	2.77052	0.56	0.151	8.22832e-181	Irak3	N2	Up	Lung
0	2.73118	0.787	0.336	0	Nedd9	N2	Up	Lung
0	2.71681	0.889	0.408	0	Baz2b	N2	Up	Lung
3.69192e-101	2.6889	0.412	0.127	9.01863e-97	Diaph2	N2	Up	Lung
3.77034e-84	2.66297	0.437	0.177	9.21019e-80	Cstdc4	N2	Up	Lung
1.12439e-219	2.64609	0.643	0.212	2.74666e-215	Elmo1	N2	Up	Lung
3.59979e-144	2.63887	0.485	0.128	8.79357e-140	Sntb2	N2	Up	Lung
9.57856e-116	2.60335	0.441	0.136	2.33985e-111	Slc44a1	N2	Up	Lung
2.03511e-119	2.59946	0.44	0.117	4.97136e-115	Lrrfip2	N2	Up	Lung
3.78064e-135	2.55118	0.48	0.125	9.23536e-131	Csf1	N2	Up	Lung
3.82549e-196	2.5455	0.619	0.204	9.3449e-192	Jak2	N2	Up	Lung
1.27756e-101	2.49017	0.434	0.148	3.12082e-97	Osbpl8	N2	Up	Lung
7.182e-231	2.44218	0.774	0.468	1.75442e-226	Igf1r	N2	Up	Lung
6.09266e-134	2.42871	0.501	0.179	1.48831e-129	Map3k5	N2	Up	Lung
5.3125e-81	2.41881	0.349	0.105	1.29774e-76	Mthfs	N2	Up	Lung
1.1781e-99	2.40327	0.423	0.143	2.87786e-95	Rnf19a	N2	Up	Lung
4.21977e-222	2.39019	0.687	0.263	1.03081e-217	Ptk2b	N2	Up	Lung
3.12854e-212	2.37907	0.658	0.266	7.64241e-208	Zfand3	N2	Up	Lung
9.69688e-95	2.36629	0.415	0.146	2.36875e-90	Kansl1l	N2	Up	Lung
9.05214e-78	2.3645	0.351	0.107	2.21126e-73	Pde7b	N2	Up	Lung
1.15659e-97	2.33848	0.415	0.139	2.82532e-93	Babam2	N2	Up	Lung
1.6062e-159	2.33789	0.559	0.186	3.92364e-155	Fnip1	N2	Up	Lung
6.92347e-186	2.31903	0.623	0.221	1.69127e-181	Fpr1	N2	Up	Lung
9.74286e-303	2.31799	0.793	0.379	2.37999e-298	Cmip	N2	Up	Lung
9.06198e-83	2.30229	0.38	0.129	2.21366e-78	Upp1	N2	Up	Lung
2.97454e-85	2.28687	0.368	0.11	7.26621e-81	Uba52	N2	Up	Lung
5.8849e-65	2.28054	0.32	0.11	1.43756e-60	Fndc3a	N2	Up	Lung
0	2.27302	0.965	0.571	0	Sgms2	N2	Up	Lung
0	2.27189	0.937	0.56	0	Lyn	N2	Up	Lung
8.13438e-133	2.25356	0.513	0.15	1.98707e-128	Olr1	N2	Up	Lung
3.61425e-109	2.251	0.442	0.136	8.82889e-105	Mapre2	N2	Up	Lung
1.46405e-67	2.24987	0.322	0.106	3.57638e-63	Vps13d	N2	Up	Lung
0	2.20741	0.883	0.451	0	App	N2	Up	Lung
0	2.20117	0.892	0.576	0	Btbd9	N2	Up	Lung
5.08891e-174	2.19272	0.662	0.31	1.24312e-169	Trps1	N2	Up	Lung
0	2.18708	0.943	0.487	0	Pik3ap1	N2	Up	Lung
1.97825e-257	2.18086	0.761	0.336	4.83248e-253	Sema4d	N2	Up	Lung
0	2.15606	0.896	0.497	0	Zeb2	N2	Up	Lung
1.74313e-41	2.1272	0.256	0.103	4.25811e-37	Mindy3	N2	Up	Lung
2.19322e-63	2.1269	0.311	0.103	5.3576e-59	Orai2	N2	Up	Lung
1.41198e-225	2.1257	0.751	0.4	3.44918e-221	Ripor2	N2	Up	Lung
1.17481e-154	2.11976	0.592	0.223	2.86982e-150	Ptpn12	N2	Up	Lung
2.52696e-61	2.11043	0.31	0.104	6.17285e-57	Slc49a4	N2	Up	Lung
6.6459e-216	2.09745	0.71	0.288	1.62346e-211	Erbin	N2	Up	Lung
4.05419e-68	2.09712	0.347	0.125	9.90359e-64	Etv6	N2	Up	Lung
2.83758e-83	2.09475	0.405	0.153	6.93164e-79	Runx2	N2	Up	Lung
3.84177e-250	2.08792	0.773	0.353	9.38467e-246	N4bp1	N2	Up	Lung
4.13189e-80	2.05635	0.41	0.167	1.00934e-75	Zswim6	N2	Up	Lung
1.30537e-256	2.05023	0.801	0.407	3.18876e-252	Mbnl2	N2	Up	Lung
5.09987e-91	2.04611	0.411	0.147	1.2458e-86	Pias1	N2	Up	Lung
1.26954e-161	2.03973	0.621	0.285	3.10124e-157	Susd6	N2	Up	Lung
2.11274e-69	2.03954	0.332	0.105	5.16099e-65	Tnip1	N2	Up	Lung
2.44612e-97	2.03357	0.447	0.163	5.97538e-93	Metrnl	N2	Up	Lung
9.37904e-97	2.03159	0.482	0.226	2.29111e-92	Msra	N2	Up	Lung
0	2.02508	0.942	0.682	0	Ifitm1	N2	Up	Lung
1.5213e-74	2.01838	0.405	0.175	3.71623e-70	Rbm47	N2	Up	Lung
7.00046e-85	2.00434	0.429	0.181	1.71007e-80	Esd	N2	Up	Lung
1.74258e-118	1.96673	0.511	0.192	4.25679e-114	Lpin2	N2	Up	Lung
1.29784e-55	1.95853	0.346	0.158	3.17037e-51	Tmem164	N2	Up	Lung
9.36673e-58	1.94317	0.313	0.114	2.2881e-53	Stx6	N2	Up	Lung
1.81145e-46	1.94018	0.27	0.103	4.425e-42	Pip5k1b	N2	Up	Lung
5.3457e-107	1.92819	0.473	0.154	1.30585e-102	Bhlhe40	N2	Up	Lung
2.3635e-83	1.90786	0.393	0.143	5.77356e-79	Lrrc25	N2	Up	Lung
8.22445e-231	1.90429	0.785	0.415	2.00907e-226	Il1rap	N2	Up	Lung
3.02711e-306	1.90241	0.887	0.544	7.39463e-302	Rab8b	N2	Up	Lung
5.92595e-57	1.89724	0.308	0.112	1.44759e-52	Dyrk1a	N2	Up	Lung
3.20284e-81	1.88599	0.42	0.182	7.82389e-77	Il15	N2	Up	Lung
2.76983e-122	1.87419	0.578	0.279	6.76615e-118	Gk	N2	Up	Lung
3.39797e-65	1.86579	0.335	0.121	8.30056e-61	Ubap1	N2	Up	Lung
5.69722e-75	1.86208	0.383	0.155	1.39172e-70	Tmem38b	N2	Up	Lung
1.79191e-153	1.83095	0.607	0.232	4.37727e-149	Rasa2	N2	Up	Lung
6.15174e-39	1.826	0.275	0.125	1.50275e-34	Kansl1	N2	Up	Lung
8.54199e-89	1.81315	0.438	0.168	2.08664e-84	Cflar	N2	Up	Lung
8.41182e-58	1.79794	0.353	0.154	2.05484e-53	Fli1	N2	Up	Lung
6.50799e-105	1.79266	0.553	0.286	1.58977e-100	Prkcb	N2	Up	Lung
7.03686e-69	1.78684	0.382	0.155	1.71897e-64	Tank	N2	Up	Lung
4.0178e-99	1.76958	0.492	0.226	9.81467e-95	Fas	N2	Up	Lung
2.53129e-33	1.76901	0.247	0.113	6.18343e-29	Plekhm3	N2	Up	Lung
2.7375e-92	1.7598	0.493	0.229	6.68718e-88	Aff1	N2	Up	Lung
6.56944e-46	1.75887	0.309	0.134	1.60478e-41	Tgfbr1	N2	Up	Lung
7.45642e-166	1.74004	0.712	0.398	1.82145e-161	Ralgapa1	N2	Up	Lung
3.86241e-47	1.71216	0.293	0.118	9.43509e-43	Bcl2l1	N2	Up	Lung
1.07496e-62	1.70997	0.38	0.174	2.62592e-58	Znrf1	N2	Up	Lung
5.54803e-33	1.70289	0.259	0.125	1.35527e-28	Sh3bp5	N2	Up	Lung
4.17632e-40	1.70119	0.283	0.129	1.02019e-35	Ankhd1	N2	Up	Lung
1.46842e-60	1.69042	0.386	0.189	3.58706e-56	Rab31	N2	Up	Lung
7.64507e-39	1.68111	0.259	0.111	1.86754e-34	Uhrf1bp1l	N2	Up	Lung
3.86364e-79	1.68059	0.521	0.266	9.43809e-75	Stfa2l1	N2	Up	Lung
9.9715e-77	1.6797	0.479	0.237	2.43584e-72	Cd274	N2	Up	Lung
3.02952e-190	1.67953	0.743	0.35	7.4005e-186	Slfn2	N2	Up	Lung
3.5124e-59	1.67945	0.37	0.17	8.5801e-55	Sgpl1	N2	Up	Lung
3.05564e-94	1.67895	0.493	0.236	7.46431e-90	Map2k4	N2	Up	Lung
2.26712e-116	1.67062	0.585	0.289	5.53811e-112	Abi1	N2	Up	Lung
6.11352e-109	1.67019	0.519	0.194	1.49341e-104	Hspa4l	N2	Up	Lung
6.19381e-61	1.65682	0.363	0.161	1.51302e-56	Mtmr6	N2	Up	Lung
2.77174e-254	1.65613	0.868	0.562	6.77082e-250	Cox17	N2	Up	Lung
3.22014e-50	1.65592	0.326	0.147	7.86616e-46	Dock5	N2	Up	Lung
2.09992e-66	1.64975	0.38	0.165	5.12968e-62	Rab32	N2	Up	Lung
4.20725e-111	1.64664	0.558	0.277	1.02775e-106	Klra2	N2	Up	Lung
3.63606e-45	1.63781	0.342	0.176	8.88216e-41	Slc12a6	N2	Up	Lung
6.34087e-46	1.63737	0.324	0.156	1.54895e-41	Atp7a	N2	Up	Lung
4.94274e-41	1.63066	0.325	0.166	1.20741e-36	Peak1	N2	Up	Lung
5.33815e-76	1.62958	0.484	0.262	1.304e-71	Pdlim5	N2	Up	Lung
4.23314e-40	1.62807	0.259	0.105	1.03407e-35	Optn	N2	Up	Lung
5.51972e-35	1.62554	0.28	0.136	1.34836e-30	Utrn	N2	Up	Lung
0	1.62511	0.979	0.657	0	Nfkbia	N2	Up	Lung
1.32693e-41	1.61643	0.294	0.136	3.24142e-37	Mtmr3	N2	Up	Lung
2.71461e-44	1.61571	0.291	0.126	6.63125e-40	St3gal5	N2	Up	Lung
1.11591e-83	1.6084	0.467	0.215	2.72594e-79	Tmbim4	N2	Up	Lung
2.32062e-49	1.59756	0.382	0.206	5.66881e-45	Gnaq	N2	Up	Lung
6.88764e-49	1.59568	0.337	0.154	1.68251e-44	Sipa1l1	N2	Up	Lung
6.36923e-25	1.59166	0.238	0.127	1.55587e-20	Wdfy3	N2	Up	Lung
5.51856e-55	1.56833	0.381	0.191	1.34807e-50	Camk1d	N2	Up	Lung
1.29713e-21	1.56241	0.218	0.118	3.16862e-17	Syne1	N2	Up	Lung
1.39291e-63	1.56032	0.458	0.248	3.40259e-59	Esyt2	N2	Up	Lung
1.99043e-46	1.55587	0.319	0.147	4.86222e-42	Wwp2	N2	Up	Lung
5.71345e-48	1.55338	0.298	0.121	1.39568e-43	Sipa1l2	N2	Up	Lung
4.95357e-58	1.55233	0.405	0.205	1.21006e-53	Uvrag	N2	Up	Lung
1.65085e-105	1.54805	0.635	0.364	4.03269e-101	Runx1	N2	Up	Lung
5.77979e-85	1.54352	0.444	0.161	1.41189e-80	Ccl4	N2	Up	Lung
2.37199e-150	1.53982	0.672	0.373	5.79429e-146	Sirpb1b	N2	Up	Lung
3.66566e-111	1.53671	0.59	0.299	8.95448e-107	Iqsec1	N2	Up	Lung
6.23355e-114	1.53151	0.647	0.379	1.52273e-109	Gadd45a	N2	Up	Lung
3.15501e-125	1.52981	0.625	0.289	7.70706e-121	Zfp36l1	N2	Up	Lung
1.50161e-168	1.51304	0.771	0.487	3.66813e-164	Tspo	N2	Up	Lung
5.80768e-19	1.50812	0.199	0.111	1.4187e-14	Arid1b	N2	Up	Lung
4.26062e-143	1.50463	0.686	0.422	1.04078e-138	Lpcat2	N2	Up	Lung
1.40987e-31	1.50456	0.261	0.123	3.44403e-27	Arhgap18	N2	Up	Lung
6.06826e-129	1.50225	0.668	0.366	1.48235e-124	Hif1a	N2	Up	Lung
5.60085e-62	1.50124	0.411	0.193	1.36818e-57	Gch1	N2	Up	Lung
3.26961e-41	1.49912	0.299	0.129	7.98701e-37	Scarb2	N2	Up	Lung
1.17797e-75	1.49717	0.424	0.172	2.87754e-71	Mefv	N2	Up	Lung
1.40809e-116	1.49368	0.627	0.33	3.43968e-112	Cux1	N2	Up	Lung
1.09637e-131	1.48892	0.631	0.324	2.67821e-127	Igsf6	N2	Up	Lung
3.8953e-90	1.48669	0.561	0.316	9.51545e-86	Mir142hg	N2	Up	Lung
5.05512e-83	1.48565	0.464	0.197	1.23487e-78	Noct	N2	Up	Lung
0	1.47885	0.999	0.897	0	Cxcl2	N2	Up	Lung
2.50877e-52	1.47797	0.371	0.18	6.12842e-48	Cpeb4	N2	Up	Lung
1.57933e-41	1.47737	0.3	0.134	3.85798e-37	Mapk6	N2	Up	Lung
1.26555e-37	1.4745	0.28	0.132	3.09148e-33	Tbk1	N2	Up	Lung
5.99013e-19	1.45363	0.202	0.109	1.46327e-14	Epb41l2	N2	Up	Lung
2.0033e-25	1.44554	0.249	0.138	4.89367e-21	Sgms1	N2	Up	Lung
1.32647e-32	1.44038	0.266	0.136	3.24029e-28	Lamb3	N2	Up	Lung
1.83481e-53	1.43915	0.412	0.223	4.48208e-49	Casp4	N2	Up	Lung
1.52681e-19	1.43608	0.223	0.132	3.72968e-15	St3gal4	N2	Up	Lung
1.24538e-67	1.43518	0.483	0.259	3.0422e-63	Rapgef6	N2	Up	Lung
1.49817e-59	1.42181	0.461	0.261	3.65972e-55	Lrrc8d	N2	Up	Lung
1.00394e-119	1.42036	0.62	0.322	2.45242e-115	Chmp4b	N2	Up	Lung
2.06195e-85	1.41861	0.624	0.419	5.03694e-81	Arhgap15	N2	Up	Lung
2.18986e-205	1.41765	0.831	0.531	5.3494e-201	Arg2	N2	Up	Lung
9.08674e-75	1.41345	0.512	0.269	2.21971e-70	Sod2	N2	Up	Lung
4.76798e-85	1.39977	0.519	0.255	1.16472e-80	Tet2	N2	Up	Lung
1.06162e-25	1.39099	0.249	0.134	2.59332e-21	Cyfip1	N2	Up	Lung
4.39241e-37	1.38939	0.303	0.152	1.07298e-32	Foxn2	N2	Up	Lung
1.53177e-42	1.3892	0.369	0.206	3.74181e-38	Acap2	N2	Up	Lung
7.54818e-127	1.38715	0.778	0.55	1.84387e-122	Wfdc21	N2	Up	Lung
3.4233e-46	1.37124	0.313	0.132	8.36245e-42	Alas1	N2	Up	Lung
7.17632e-114	1.37006	0.641	0.37	1.75303e-109	Notch2	N2	Up	Lung
5.43463e-112	1.3672	0.657	0.383	1.32757e-107	Inpp5d	N2	Up	Lung
5.10807e-32	1.36542	0.246	0.113	1.2478e-27	Gm15832	N2	Up	Lung
3.45351e-34	1.36417	0.298	0.157	8.43625e-30	Cdk13	N2	Up	Lung
1.04947e-40	1.34753	0.371	0.213	2.56366e-36	AA467197	N2	Up	Lung
6.87498e-30	1.33942	0.258	0.132	1.67942e-25	Relb	N2	Up	Lung
4.36383e-28	1.33717	0.267	0.147	1.066e-23	Btbd7	N2	Up	Lung
2.59284e-33	1.33694	0.247	0.111	6.33379e-29	C3	N2	Up	Lung
1.05002e-52	1.33637	0.427	0.231	2.56498e-48	Dennd1b	N2	Up	Lung
1.52519e-23	1.33246	0.232	0.126	3.72574e-19	Stim2	N2	Up	Lung
1.1532e-20	1.32622	0.208	0.105	2.81703e-16	Atxn1	N2	Up	Lung
3.18516e-18	1.32598	0.19	0.101	7.78071e-14	Mctp2	N2	Up	Lung
5.76341e-22	1.32398	0.212	0.112	1.40789e-17	Psen1	N2	Up	Lung
3.86186e-124	1.31498	0.771	0.553	9.43375e-120	Fam107b	N2	Up	Lung
7.93777e-31	1.30692	0.254	0.125	1.93904e-26	Sec24b	N2	Up	Lung
6.32643e-39	1.29989	0.29	0.13	1.54542e-34	Gcnt1	N2	Up	Lung
2.38279e-23	1.29819	0.24	0.137	5.82069e-19	Atxn7l1	N2	Up	Lung
1.34007e-22	1.29743	0.244	0.143	3.27352e-18	Cd101	N2	Up	Lung
2.68112e-24	1.29054	0.237	0.123	6.54944e-20	Dip2b	N2	Up	Lung
1.32581e-42	1.28985	0.493	0.333	3.23869e-38	Asprv1	N2	Up	Lung
1.47509e-28	1.28339	0.291	0.169	3.60336e-24	Atg7	N2	Up	Lung
1.71555e-16	1.27625	0.182	0.102	4.19074e-12	Vav1	N2	Up	Lung
4.02058e-38	1.2688	0.352	0.197	9.82147e-34	Rybp	N2	Up	Lung
1.40792e-86	1.26343	0.567	0.331	3.43926e-82	Anxa11	N2	Up	Lung
2.38033e-35	1.26088	0.35	0.207	5.81468e-31	Cyfip2	N2	Up	Lung
1.42607e-183	1.245	0.86	0.565	3.48359e-179	Smox	N2	Up	Lung
7.01134e-31	1.24415	0.279	0.137	1.71273e-26	Sla	N2	Up	Lung
1.21657e-52	1.24264	0.42	0.238	2.97185e-48	Arrdc4	N2	Up	Lung
3.34584e-105	1.24154	0.772	0.627	8.17322e-101	Lyst	N2	Up	Lung
5.07832e-20	1.23622	0.195	0.102	1.24053e-15	Mthfsl	N2	Up	Lung
5.49837e-127	1.2336	0.745	0.478	1.34314e-122	Mapkapk2	N2	Up	Lung
6.85123e-18	1.22655	0.191	0.103	1.67362e-13	Ap3b1	N2	Up	Lung
0	1.22231	0.999	0.918	0	Ifitm2	N2	Up	Lung
5.96968e-49	1.22178	0.414	0.251	1.45827e-44	Gng12	N2	Up	Lung
3.5948e-226	1.22076	0.974	0.801	8.78137e-222	Clec4e	N2	Up	Lung
4.56336e-32	1.21753	0.282	0.148	1.11474e-27	4732465J04Rik	N2	Up	Lung
5.04831e-52	1.19218	0.517	0.342	1.2332e-47	Pag1	N2	Up	Lung
0	1.19044	0.999	0.966	0	Cd44	N2	Up	Lung
3.4146e-44	1.18627	0.399	0.225	8.34118e-40	Trip12	N2	Up	Lung
2.67217e-43	1.18478	0.421	0.251	6.52758e-39	Clint1	N2	Up	Lung
1.158e-99	1.18136	0.741	0.528	2.82877e-95	Gm26740	N2	Up	Lung
2.82486e-24	1.18128	0.273	0.15	6.90056e-20	Chka	N2	Up	Lung
7.6943e-78	1.18005	0.549	0.316	1.87956e-73	Rnf19b	N2	Up	Lung
8.97377e-42	1.17622	0.413	0.241	2.19211e-37	Gna13	N2	Up	Lung
3.02414e-20	1.16921	0.233	0.13	7.38737e-16	Zeb1	N2	Up	Lung
2.16444e-96	1.16918	0.663	0.428	5.2873e-92	Nadk	N2	Up	Lung
1.3925e-229	1.15767	0.953	0.796	3.40161e-225	Entpd1	N2	Up	Lung
4.18246e-41	1.15421	0.347	0.185	1.02169e-36	Tlr13	N2	Up	Lung
1.55758e-29	1.15122	0.279	0.148	3.80486e-25	Mylip	N2	Up	Lung
5.42565e-15	1.14975	0.183	0.107	1.32538e-10	Ndfip2	N2	Up	Lung
2.78949e-13	1.14944	0.295	0.208	6.81417e-09	Spp1	N2	Up	Lung
2.10181e-17	1.14883	0.205	0.111	5.1343e-13	Gns	N2	Up	Lung
1.48041e-33	1.14467	0.338	0.199	3.61633e-29	Dop1b	N2	Up	Lung
1.33652e-10	1.12866	0.169	0.107	3.26485e-06	Pde3b	N2	Up	Lung
2.75343e-18	1.1283	0.192	0.105	6.72608e-14	Ell	N2	Up	Lung
1.59214e-19	1.12649	0.204	0.109	3.88928e-15	Nfkbib	N2	Up	Lung
1.08903e-42	1.11647	0.38	0.201	2.66029e-38	Tnfaip8	N2	Up	Lung
9.83972e-45	1.11529	0.353	0.165	2.40365e-40	Ctsl	N2	Up	Lung
4.14605e-85	1.10541	0.703	0.499	1.0128e-80	Jmjd1c	N2	Up	Lung
1.05065e-44	1.10046	0.469	0.324	2.56654e-40	Cpd	N2	Up	Lung
2.06774e-43	1.0993	0.416	0.243	5.05107e-39	Lasp1	N2	Up	Lung
1.24553e-44	1.094	0.399	0.241	3.04259e-40	Crlf2	N2	Up	Lung
3.33595e-10	1.09085	0.166	0.107	8.14906e-06	B3gnt2	N2	Up	Lung
1.45592e-22	1.08751	0.222	0.116	3.55653e-18	Med7	N2	Up	Lung
8.66376e-98	1.08708	0.716	0.473	2.11638e-93	Stx11	N2	Up	Lung
2.95068e-16	1.07803	0.199	0.115	7.20793e-12	Cul1	N2	Up	Lung
1.61301e-10	1.07791	0.163	0.104	3.94027e-06	Slco3a1	N2	Up	Lung
6.80042e-299	1.07313	0.99	0.94	1.66121e-294	Cd9	N2	Up	Lung
5.71399e-11	1.07215	0.343	0.288	1.39581e-06	Dhx40	N2	Up	Lung
2.56481e-49	1.06974	0.466	0.282	6.26532e-45	Il18rap	N2	Up	Lung
4.20263e-50	1.06869	0.527	0.351	1.02662e-45	Dmxl2	N2	Up	Lung
3.74083e-65	1.06737	0.521	0.317	9.13811e-61	Por	N2	Up	Lung
1.54511e-31	1.06643	0.34	0.19	3.7744e-27	Ankrd17	N2	Up	Lung
1.0982e-19	1.06539	0.256	0.161	2.68267e-15	Hpcal1	N2	Up	Lung
8.26156e-08	1.0536	0.15	0.103	0.00201813	Itgav	N2	Up	Lung
9.99698e-39	1.04759	0.488	0.337	2.44206e-34	Nfat5	N2	Up	Lung
6.92132e-30	1.04477	0.356	0.225	1.69074e-25	Nptn	N2	Up	Lung
5.69377e-19	1.04168	0.26	0.152	1.39087e-14	Clec4n	N2	Up	Lung
1.90705e-16	1.04073	0.327	0.252	4.65853e-12	Ipcef1	N2	Up	Lung
3.14319e-58	1.03302	0.672	0.503	7.67817e-54	Il1rn	N2	Up	Lung
1.15968e-40	1.03071	0.399	0.219	2.83287e-36	Irf2bp2	N2	Up	Lung
2.28178e-14	1.02798	0.188	0.112	5.57392e-10	Atad2b	N2	Up	Lung
2.51633e-37	1.02066	0.42	0.281	6.14688e-33	Usp32	N2	Up	Lung
5.29836e-67	1.0135	0.708	0.577	1.29428e-62	Cyp4f18	N2	Up	Lung
5.08705e-22	-2.12241	0.925	1	1.24267e-17	mt-Co1	N0	Down	Lung
1.94414e-19	-2.60322	0.164	0.937	4.74915e-15	Xist	N0	Down	Lung
2.37418e-16	-1.73528	0.507	0.992	5.79964e-12	Mki67	N0	Down	Lung
1.2363e-13	-1.79416	0.388	0.945	3.02003e-09	Smc2	N0	Down	Lung
1.9346e-13	-1.58785	0.701	0.953	4.72584e-09	mt-Nd4	N0	Down	Lung
4.24201e-13	-1.19673	0.94	1	1.03624e-08	mt-Co3	N0	Down	Lung
1.86821e-12	-1.53953	0.448	0.953	4.56367e-08	Top2a	N0	Down	Lung
3.53207e-12	-1.32852	0.612	1	8.62813e-08	Stmn1	N0	Down	Lung
6.65379e-12	-2.01805	0.164	0.772	1.62539e-07	Plp2	N0	Down	Lung
1.10597e-11	-2.15	0.239	0.803	2.70167e-07	Fam111a	N0	Down	Lung
8.7256e-11	-2.19169	0.224	0.756	2.13149e-06	Smc6	N0	Down	Lung
9.56029e-11	-1.87643	0.224	0.772	2.33539e-06	Prc1	N0	Down	Lung
1.41961e-10	-1.26051	0.731	1	3.46782e-06	Tubb5	N0	Down	Lung
1.57803e-10	-1.32852	0.642	0.89	3.85481e-06	mt-Nd1	N0	Down	Lung
1.95586e-10	-1.88454	0.313	0.803	4.77777e-06	Kif23	N0	Down	Lung
1.97438e-10	-1.30368	0.507	0.937	4.82301e-06	Smc4	N0	Down	Lung
2.42523e-10	-1.8663	0.343	0.787	5.92434e-06	mt-Nd3	N0	Down	Lung
3.14533e-10	-1.61904	0.373	0.874	7.68341e-06	Rad21	N0	Down	Lung
4.44037e-10	-1.82687	0.179	0.701	1.08469e-05	Syne2	N0	Down	Lung
5.0006e-10	-1.79298	0.194	0.732	1.22155e-05	Kif15	N0	Down	Lung
5.09691e-10	-1.75237	0.328	0.803	1.24507e-05	Flna	N0	Down	Lung
5.97357e-10	-1.84004	0.299	0.795	1.45922e-05	Tpx2	N0	Down	Lung
9.10218e-10	-2.43487	0.209	0.693	2.22348e-05	Cenpe	N0	Down	Lung
1.52433e-09	-1.3614	0.507	0.937	3.72363e-05	Arl6ip1	N0	Down	Lung
2.72535e-09	-1.02909	0.955	0.992	6.65747e-05	Malat1	N0	Down	Lung
3.98082e-09	-2.27068	0.179	0.669	9.72435e-05	Hjurp	N0	Down	Lung
5.75184e-09	-1.07686	0.701	0.984	0.000140506	Tagln2	N0	Down	Lung
7.70388e-09	-1.24842	0.433	0.937	0.00018819	Tmpo	N0	Down	Lung
1.05163e-08	-1.62321	0.209	0.701	0.000256893	Knl1	N0	Down	Lung
2.33622e-08	-2.19944	0.269	0.685	0.000570692	Cenpf	N0	Down	Lung
2.75267e-08	-1.24975	0.388	0.906	0.000672422	Smc1a	N0	Down	Lung
3.25519e-08	-1.34284	0.313	0.772	0.000795177	Nusap1	N0	Down	Lung
3.71161e-08	-1.10793	0.478	0.874	0.000906671	Dek	N0	Down	Lung
5.82331e-08	-2.06159	0.164	0.598	0.00142252	Cdc42ep3	N0	Down	Lung
5.90784e-08	-1.20987	0.507	0.921	0.00144317	Pclaf	N0	Down	Lung
6.41276e-08	-1.65255	0.284	0.74	0.00156651	Usp1	N0	Down	Lung
7.70875e-08	-2.23838	0.119	0.559	0.00188309	Ckap2l	N0	Down	Lung
8.93912e-08	-1.6524	0.313	0.74	0.00218365	Racgap1	N0	Down	Lung
1.07336e-07	-1.48891	0.254	0.74	0.00262201	Incenp	N0	Down	Lung
1.53708e-07	-2.05548	0.104	0.528	0.00375478	Cpne3	N0	Down	Lung
1.61923e-07	-1.45972	0.299	0.748	0.00395546	Atrx	N0	Down	Lung
1.82499e-07	-1.03744	0.507	0.874	0.00445809	Ywhah	N0	Down	Lung
1.87911e-07	-1.31065	0.328	0.787	0.00459029	Lmo4	N0	Down	Lung
1.91176e-07	-1.51933	0.194	0.638	0.00467006	Purb	N0	Down	Lung
2.35453e-07	-2.2431	0.104	0.512	0.00575164	Ilf2	N0	Down	Lung
2.59045e-07	-1.16445	0.299	0.787	0.00632795	Tmed10	N0	Down	Lung
3.95583e-07	-2.00835	0.119	0.52	0.0096633	Cdc25b	N0	Down	Lung
4.56986e-07	-2.05423	0.134	0.528	0.0111632	Rassf4	N0	Down	Lung
4.96756e-07	-1.17005	0.373	0.819	0.0121347	Cdca8	N0	Down	Lung
6.02743e-07	-1.49794	0.269	0.701	0.0147238	Mat2a	N0	Down	Lung
6.51423e-07	-1.97179	0.194	0.567	0.015913	Kcnq1ot1	N0	Down	Lung
6.57538e-07	-1.87457	0.134	0.52	0.0160623	Esco2	N0	Down	Lung
7.28944e-07	-2.0043	0.104	0.504	0.0178066	Mis18bp1	N0	Down	Lung
8.08622e-07	-1.33502	0.358	0.803	0.019753	Mapre1	N0	Down	Lung
8.96983e-07	-1.85439	0.104	0.504	0.0219115	Eea1	N0	Down	Lung
9.47021e-07	-1.7222	0.179	0.622	0.0231338	Yeats4	N0	Down	Lung
1.00722e-06	-1.63735	0.179	0.614	0.0246043	Arhgap11a	N0	Down	Lung
1.03108e-06	-1.26368	0.284	0.772	0.0251872	Kmt5a	N0	Down	Lung
1.13736e-06	-1.24504	0.388	0.772	0.0277834	mt-Nd5	N0	Down	Lung
1.67162e-06	-1.67814	0.149	0.567	0.0408343	Ccni	N0	Down	Lung
1.82348e-06	-1.99598	0.104	0.48	0.0445439	Ccnb1	N0	Down	Lung
1.91458e-06	-1.16952	0.284	0.756	0.0467695	Ccna2	N0	Down	Lung
2.01791e-06	-2.09254	0.119	0.504	0.0492935	Pbk	N0	Down	Lung
1.42085e-91	-3.71536	0.229	0.915	3.47086e-87	Fos	N1	Down	Lung
2.12238e-72	-3.15031	0.236	0.881	5.18455e-68	Chil3	N1	Down	Lung
1.85305e-53	-1.24739	0.95	0.996	4.52662e-49	Lyz2	N1	Down	Lung
2.84093e-52	-2.19557	0.464	0.885	6.93982e-48	Cybb	N1	Down	Lung
1.08284e-49	-1.77593	0.827	0.987	2.64515e-45	mt-Co1	N1	Down	Lung
8.20256e-48	-1.09052	0.932	0.991	2.00372e-43	Arhgdib	N1	Down	Lung
2.00362e-47	-2.93931	0.118	0.621	4.89445e-43	Rps15	N1	Down	Lung
2.87589e-47	-2.38636	0.382	0.804	7.02523e-43	Ltf	N1	Down	Lung
4.94666e-41	-2.0984	0.475	0.889	1.20837e-36	Btg2	N1	Down	Lung
2.02384e-39	-2.25205	0.184	0.677	4.94383e-35	Rpl23a	N1	Down	Lung
6.18723e-37	-1.67294	0.329	0.817	1.51142e-32	Tln1	N1	Down	Lung
9.75335e-37	-2.11413	0.238	0.706	2.38255e-32	Osm	N1	Down	Lung
2.34901e-36	-1.33217	0.621	0.923	5.73816e-32	Ly6c2	N1	Down	Lung
2.42029e-36	-2.06607	0.22	0.66	5.91228e-32	Cpne3	N1	Down	Lung
3.19368e-36	-1.871	0.527	0.834	7.80151e-32	Camp	N1	Down	Lung
7.08187e-34	-2.16352	0.123	0.557	1.72996e-29	Nhsl2	N1	Down	Lung
2.22004e-33	-1.26021	0.677	0.881	5.42311e-29	Cd177	N1	Down	Lung
3.08378e-33	-1.86905	0.182	0.655	7.53307e-29	Eno1	N1	Down	Lung
1.41275e-32	-1.82519	0.207	0.664	3.45106e-28	Hnrnpa2b1	N1	Down	Lung
3.05712e-32	-1.85957	0.205	0.677	7.46794e-28	Rflnb	N1	Down	Lung
1.39034e-31	-1.69213	0.246	0.694	3.39632e-27	Scp2	N1	Down	Lung
1.25581e-30	-1.28016	0.829	0.966	3.06768e-26	G0s2	N1	Down	Lung
2.47815e-30	-1.71087	0.257	0.706	6.05363e-26	Tra2a	N1	Down	Lung
1.90887e-29	-1.82032	0.179	0.604	4.66298e-25	Coq10b	N1	Down	Lung
1.12318e-28	-1.82736	0.182	0.604	2.7437e-24	Fosl1	N1	Down	Lung
2.15184e-28	-1.55386	0.25	0.685	5.25652e-24	Cdadc1	N1	Down	Lung
2.67058e-28	-1.10565	0.602	0.894	6.52369e-24	Tkt	N1	Down	Lung
5.8927e-28	-1.73023	0.18	0.587	1.43947e-23	Mbnl1	N1	Down	Lung
1.40837e-27	-1.22921	0.554	0.851	3.44036e-23	Adpgk	N1	Down	Lung
2.32936e-27	-1.08744	0.743	0.966	5.69017e-23	Hmgb2	N1	Down	Lung
1.57225e-26	-1.61567	0.204	0.621	3.84069e-22	Tecr	N1	Down	Lung
2.25085e-26	-2.11783	0.123	0.481	5.49837e-22	Lta4h	N1	Down	Lung
7.81677e-26	-1.40631	0.866	0.885	1.90948e-21	Ngp	N1	Down	Lung
2.96319e-25	-1.50707	0.711	0.906	7.23849e-21	mt-Co3	N1	Down	Lung
9.07721e-25	-1.06254	0.562	0.877	2.21738e-20	Flna	N1	Down	Lung
2.34137e-24	-1.42572	0.291	0.728	5.71949e-20	Ier2	N1	Down	Lung
3.14805e-24	-2.02365	0.22	0.587	7.69006e-20	Cwc25	N1	Down	Lung
6.88882e-24	-1.08624	0.591	0.894	1.6828e-19	Eif4g2	N1	Down	Lung
1.1741e-22	-1.90751	0.179	0.54	2.86809e-18	Ppia	N1	Down	Lung
1.35517e-22	-1.45823	0.198	0.596	3.31042e-18	Srrm2	N1	Down	Lung
1.40232e-22	-1.13613	0.5	0.855	3.42559e-18	Gpx1	N1	Down	Lung
2.06685e-22	-1.68139	0.336	0.685	5.0489e-18	Tmsb10	N1	Down	Lung
2.48345e-22	-1.07425	0.523	0.851	6.06658e-18	Degs1	N1	Down	Lung
2.51134e-22	-1.37514	0.311	0.702	6.13471e-18	Itgb2l	N1	Down	Lung
5.115e-22	-1.02275	0.57	0.889	1.24949e-17	Ncf1	N1	Down	Lung
9.92296e-22	-1.39692	0.196	0.574	2.42398e-17	Golim4	N1	Down	Lung
1.11965e-21	-2.25422	0.159	0.489	2.73507e-17	Rpl13a	N1	Down	Lung
1.5857e-21	-1.76905	0.121	0.46	3.87355e-17	Nin	N1	Down	Lung
4.1495e-21	-1.43255	0.311	0.694	1.01364e-16	Ckap4	N1	Down	Lung
5.25086e-21	-1.54281	0.177	0.549	1.28268e-16	Tle5	N1	Down	Lung
3.88434e-20	-1.33942	0.218	0.613	9.48867e-16	Grk2	N1	Down	Lung
7.50695e-20	-1.78921	0.321	0.672	1.8338e-15	mt-Nd4	N1	Down	Lung
8.37249e-20	-1.50686	0.166	0.515	2.04523e-15	Ccnt1	N1	Down	Lung
1.00529e-19	-1.25665	0.602	0.894	2.45573e-15	Rps12	N1	Down	Lung
1.11905e-19	-1.60062	0.18	0.54	2.73361e-15	Pbxip1	N1	Down	Lung
1.39663e-19	-1.66332	0.418	0.719	3.41168e-15	Rps8	N1	Down	Lung
2.24327e-19	-1.54326	0.22	0.566	5.47985e-15	Hsp90ab1	N1	Down	Lung
2.61413e-19	-1.53236	0.162	0.511	6.3858e-15	Purb	N1	Down	Lung
4.11678e-19	-1.46967	0.157	0.494	1.00565e-14	Sf3b2	N1	Down	Lung
9.00433e-19	-1.27231	0.707	0.915	2.19958e-14	mt-Co2	N1	Down	Lung
9.16425e-19	-1.20069	0.318	0.702	2.23864e-14	Mpc2	N1	Down	Lung
1.44027e-18	-1.59445	0.125	0.443	3.51829e-14	Srsf3	N1	Down	Lung
1.79015e-18	-1.42226	0.352	0.685	4.37298e-14	St3gal5	N1	Down	Lung
4.9291e-18	-2.35417	0.107	0.362	1.20408e-13	Ptma	N1	Down	Lung
5.01505e-18	-1.9647	0.111	0.391	1.22508e-13	Rack1	N1	Down	Lung
6.46193e-18	-2.56488	0.102	0.362	1.57852e-13	mt-Nd1	N1	Down	Lung
1.2049e-17	-1.24463	0.262	0.634	2.94333e-13	Ybx1	N1	Down	Lung
1.2362e-17	-1.56045	0.196	0.515	3.01979e-13	Ets1	N1	Down	Lung
1.61503e-17	-1.5297	0.104	0.387	3.9452e-13	Rgs18	N1	Down	Lung
1.7405e-17	-1.7168	0.23	0.54	4.25169e-13	Stap1	N1	Down	Lung
2.28237e-17	-1.49961	0.105	0.4	5.57538e-13	Cklf	N1	Down	Lung
2.74626e-17	-1.47612	0.182	0.494	6.70858e-13	Hmgcr	N1	Down	Lung
1.25413e-16	-1.38399	0.212	0.54	3.0636e-12	Sfpq	N1	Down	Lung
2.68913e-16	-1.66605	0.134	0.421	6.569e-12	Rpl31	N1	Down	Lung
3.49442e-16	-1.50516	0.216	0.519	8.53616e-12	Plscr1	N1	Down	Lung
5.12879e-16	-1.00786	0.405	0.749	1.25286e-11	Tmed5	N1	Down	Lung
6.84664e-16	-1.10577	0.388	0.728	1.6725e-11	Clk1	N1	Down	Lung
7.46029e-16	-1.49514	0.318	0.626	1.8224e-11	Nktr	N1	Down	Lung
9.12965e-16	-1.15105	0.411	0.74	2.23019e-11	Fosl2	N1	Down	Lung
1.33389e-15	-1.38367	0.121	0.4	3.25843e-11	Atrx	N1	Down	Lung
1.81016e-15	-1.69444	0.207	0.515	4.42186e-11	Rpsa	N1	Down	Lung
3.16328e-15	-1.16927	0.22	0.549	7.72727e-11	Clec12a	N1	Down	Lung
3.56681e-15	-1.3102	0.198	0.511	8.713e-11	Ceacam1	N1	Down	Lung
3.79894e-15	-1.30441	0.136	0.413	9.28006e-11	Gca	N1	Down	Lung
5.79164e-15	-1.37561	0.42	0.74	1.41478e-10	Gsn	N1	Down	Lung
1.85695e-14	-1.42188	0.109	0.362	4.53615e-10	Lpgat1	N1	Down	Lung
1.87411e-14	-1.45579	0.2	0.489	4.57809e-10	Ankrd13c	N1	Down	Lung
2.04389e-14	-1.17437	0.212	0.553	4.99281e-10	Sun2	N1	Down	Lung
2.27033e-14	-1.30174	0.138	0.426	5.54595e-10	Taf7	N1	Down	Lung
2.60604e-14	-1.42528	0.275	0.574	6.36602e-10	Rpl6	N1	Down	Lung
2.63775e-14	-1.44404	0.145	0.413	6.4435e-10	Naca	N1	Down	Lung
2.76948e-14	-1.02318	0.211	0.498	6.76529e-10	Serpinb1a	N1	Down	Lung
3.00154e-14	-1.34715	0.112	0.374	7.33215e-10	Atp5b	N1	Down	Lung
3.31626e-14	-1.31746	0.114	0.379	8.10096e-10	Trp53inp2	N1	Down	Lung
3.65864e-14	-1.10777	0.302	0.651	8.93733e-10	Limd2	N1	Down	Lung
4.01032e-14	-1.30077	0.121	0.391	9.7964e-10	Slc40a1	N1	Down	Lung
4.91585e-14	-1.04331	0.359	0.702	1.20084e-09	Tgoln1	N1	Down	Lung
5.57559e-14	-1.0385	0.468	0.766	1.362e-09	Hmgn2	N1	Down	Lung
6.47628e-14	-1.03791	0.259	0.591	1.58203e-09	Acpp	N1	Down	Lung
7.06579e-14	-1.27691	0.109	0.357	1.72603e-09	Rbfa	N1	Down	Lung
1.47117e-13	-1.13596	0.23	0.566	3.59378e-09	Ogfrl1	N1	Down	Lung
1.5391e-13	-1.06096	0.598	0.813	3.7597e-09	Neat1	N1	Down	Lung
1.77247e-13	-1.12133	0.841	0.809	4.32979e-09	Mmp8	N1	Down	Lung
4.15977e-13	-1.38816	0.102	0.34	1.01615e-08	Rinl	N1	Down	Lung
4.25824e-13	-1.10341	0.198	0.502	1.0402e-08	Hnrnpf	N1	Down	Lung
4.3843e-13	-1.34036	0.112	0.353	1.071e-08	Fam117b	N1	Down	Lung
5.41403e-13	-1.00511	0.293	0.6	1.32254e-08	Ltb4r1	N1	Down	Lung
6.35946e-13	-1.03554	0.211	0.536	1.55349e-08	Rbx1	N1	Down	Lung
1.21702e-12	-1.32693	0.116	0.357	2.97293e-08	Rcsd1	N1	Down	Lung
1.48851e-12	-1.30138	0.143	0.396	3.63613e-08	Cnbp	N1	Down	Lung
3.41996e-12	-1.08062	0.25	0.54	8.35429e-08	Ubl3	N1	Down	Lung
4.04364e-12	-1.45214	0.255	0.532	9.8778e-08	Rpl10	N1	Down	Lung
2.38798e-11	-1.21947	0.125	0.362	5.83336e-07	Zdhhc3	N1	Down	Lung
3.401e-11	-1.34371	0.102	0.306	8.30796e-07	Rrbp1	N1	Down	Lung
3.57749e-11	-1.00924	0.207	0.506	8.7391e-07	G6pdx	N1	Down	Lung
3.77057e-11	-1.08182	0.168	0.426	9.21075e-07	Tm6sf1	N1	Down	Lung
5.96325e-11	-1.06898	0.141	0.391	1.4567e-06	Arid3a	N1	Down	Lung
6.21051e-11	-1.16315	0.116	0.336	1.5171e-06	Usp33	N1	Down	Lung
6.60325e-11	-1.08937	0.107	0.323	1.61304e-06	Tmx3	N1	Down	Lung
7.69336e-11	-1.15284	0.154	0.387	1.87933e-06	B3gnt2	N1	Down	Lung
1.3692e-10	-1.22361	0.125	0.34	3.34469e-06	Cox7b	N1	Down	Lung
1.45295e-10	-1.15086	0.129	0.357	3.54926e-06	Atp5mpl	N1	Down	Lung
1.45994e-10	-1.23164	0.705	0.838	3.56634e-06	mt-Atp6	N1	Down	Lung
1.58931e-10	-1.00404	0.182	0.443	3.88238e-06	Cops9	N1	Down	Lung
1.77786e-10	-1.12575	0.15	0.391	4.34295e-06	Ppp1r3b	N1	Down	Lung
1.9346e-10	-1.15579	0.148	0.391	4.72585e-06	Sik1	N1	Down	Lung
2.56474e-10	-1.14535	0.154	0.383	6.26515e-06	Tra2b	N1	Down	Lung
2.62515e-10	-1.04305	0.129	0.357	6.41272e-06	Ppm1m	N1	Down	Lung
2.73461e-10	-1.17297	0.186	0.43	6.68011e-06	Ap1s2	N1	Down	Lung
3.18441e-10	-1.06424	0.191	0.464	7.77888e-06	Capn1	N1	Down	Lung
3.23899e-10	-1.04117	0.121	0.34	7.91221e-06	Atp5k	N1	Down	Lung
3.518e-10	-1.3158	0.241	0.481	8.59377e-06	Rpl32	N1	Down	Lung
4.69541e-10	-1.04122	0.13	0.362	1.14699e-05	Aldh3b1	N1	Down	Lung
5.04926e-10	-1.05194	0.182	0.43	1.23343e-05	Arl6ip1	N1	Down	Lung
2.71778e-09	-1.16842	0.175	0.404	6.63898e-05	Kif5b	N1	Down	Lung
2.74205e-09	-1.05729	0.134	0.349	6.69829e-05	Zfp516	N1	Down	Lung
4.03406e-09	-1.00594	0.125	0.34	9.85439e-05	Plcg2	N1	Down	Lung
8.30726e-09	-1.00272	0.198	0.434	0.00020293	Ncoa4	N1	Down	Lung
[truncated: 1,573 more rows]

## Sheet: Table 4 EAE_Tissues
Gene	p_val	avg_log2FC	pct.1	pct.2	p_val_adj	Tissue	Subset
Nusap1	1.02072e-73	0.732423	0.768	0.647	2.49342e-69	Spleen	N0
Ifitm3	1.03888e-65	0.887129	0.79	0.699	2.53777e-61	Spleen	N0
Top2a	8.20158e-58	0.58236	0.88	0.813	2.00348e-53	Spleen	N0
Mki67	1.38894e-55	0.542271	0.888	0.815	3.3929e-51	Spleen	N0
G6pdx	3.87581e-48	0.633965	0.574	0.468	9.46783e-44	Spleen	N0
Clec5a	5.07366e-48	0.505396	0.667	0.6	1.23939e-43	Spleen	N0
Hk3	3.62798e-46	0.615546	0.557	0.445	8.86242e-42	Spleen	N0
Cd74	4.10748e-44	2.93093	0.113	0.016	1.00337e-39	Spleen	N0
Fgd4	2.98533e-42	0.578634	0.607	0.511	7.29256e-38	Spleen	N0
Lst1	1.08976e-38	0.582892	0.621	0.536	2.66208e-34	Spleen	N0
Atpif1	5.91367e-38	0.78178	0.809	0.772	1.44459e-33	Spleen	N0
Pilra	2.58925e-37	0.583729	0.503	0.391	6.32502e-33	Spleen	N0
Pram1	7.07747e-37	0.520923	0.588	0.499	1.72888e-32	Spleen	N0
Pirb	8.98895e-37	0.599358	0.554	0.445	2.19582e-32	Spleen	N0
F630028O10Rik	1.55916e-36	0.500899	0.875	0.925	3.80873e-32	Spleen	N0
Rpl41	1.5859e-34	0.655598	0.994	0.991	3.87403e-30	Spleen	N0
Pbx1	5.04637e-34	0.520295	0.764	0.699	1.23273e-29	Spleen	N0
H2ac8	1.30228e-32	0.713748	0.683	0.606	3.1812e-28	Spleen	N0
Xdh	1.97382e-30	0.6413	0.51	0.401	4.82165e-26	Spleen	N0
Fam111a	9.50657e-26	0.543808	0.463	0.386	2.32226e-21	Spleen	N0
Uqcr11	2.32334e-25	0.594875	0.541	0.502	5.67546e-21	Spleen	N0
Rrm1	1.01778e-24	0.563614	0.526	0.491	2.48624e-20	Spleen	N0
Hdc	1.31127e-24	0.80163	0.334	0.228	3.20318e-20	Spleen	N0
Chil1	1.42102e-23	0.544576	0.479	0.406	3.47127e-19	Spleen	N0
Gpr141	5.55053e-21	0.541505	0.451	0.372	1.35588e-16	Spleen	N0
Atrnl1	3.63361e-19	0.50388	0.409	0.325	8.87618e-15	Spleen	N0
Lilrb4a	2.60381e-18	0.511772	0.415	0.334	6.36059e-14	Spleen	N0
H1f3	4.03238e-18	0.597033	0.471	0.428	9.85029e-14	Spleen	N0
H3c6	2.80025e-17	0.583782	0.384	0.323	6.84045e-13	Spleen	N0
Fpr2	2.6652e-16	0.887591	0.256	0.172	6.51055e-12	Spleen	N0
H2bc15	3.70537e-16	0.581658	0.36	0.3	9.05148e-12	Spleen	N0
Tmem14c	8.45604e-16	0.930494	0.497	0.478	2.06564e-11	Spleen	N0
Rpl35	2.64124e-13	0.522769	0.649	0.65	6.45202e-09	Spleen	N0
Gclm	9.23183e-13	0.790064	0.317	0.269	2.25515e-08	Spleen	N0
Pola1	2.93654e-11	0.704468	0.332	0.281	7.17338e-07	Spleen	N0
Diaph3	1.68318e-09	0.530129	0.403	0.4	4.11167e-05	Spleen	N0
Atad5	8.15346e-09	0.622652	0.316	0.288	0.000199173	Spleen	N0
Lipg	1.97092e-08	1.0801	0.109	0.065	0.000481456	Spleen	N0
Trak2	1.13647e-07	0.550633	0.268	0.238	0.00277617	Spleen	N0
Prdx2	1.74099e-07	2.6547	0.132	0.088	0.00425289	Spleen	N0
Cmah	6.43451e-07	0.924739	0.116	0.075	0.0157182	Spleen	N0
Atp6v0d2	0	9.83293	0.478	0.002	0	Lung	N0
Plet1	0	11.3734	0.433	0.001	0	Lung	N0
Krt79	7.38894e-284	13.255	0.313	0	1.80497e-279	Lung	N0
Fabp1	2.22514e-270	14.2353	0.299	0	5.43557e-266	Lung	N0
Ltc4s	4.62737e-268	9.87292	0.388	0.002	1.13037e-263	Lung	N0
Lpl	1.75814e-257	9.60695	0.433	0.004	4.29478e-253	Lung	N0
Cidec	6.61053e-257	12.6218	0.284	0	1.61482e-252	Lung	N0
Il18	2.7512e-255	9.69001	0.373	0.002	6.72062e-251	Lung	N0
Mrc1	7.72143e-255	10.1319	0.343	0.001	1.88619e-250	Lung	N0
Scgb1a1	4.92061e-248	10.9543	0.313	0.001	1.20201e-243	Lung	N0
Ctsk	5.61054e-248	10.4573	0.313	0.001	1.37054e-243	Lung	N0
Krt19	1.93767e-243	12.9879	0.269	0	4.73335e-239	Lung	N0
Ear1	1.44021e-242	10.3294	0.358	0.002	3.51815e-238	Lung	N0
Dab2	9.26061e-235	10.2391	0.299	0.001	2.26218e-230	Lung	N0
Serpine1	1.72056e-230	12.6747	0.269	0	4.20299e-226	Lung	N0
Shtn1	1.65986e-205	10.164	0.254	0	4.05471e-201	Lung	N0
Cpne8	1.20654e-203	10.6901	0.239	0	2.94733e-199	Lung	N0
Slc7a2	4.51011e-203	12.5755	0.224	0	1.10173e-198	Lung	N0
Ctss	3.56504e-198	7.51995	0.552	0.014	8.70867e-194	Lung	N0
Bcl2a1d	1.36856e-190	7.83965	0.373	0.005	3.34312e-186	Lung	N0
Gdf15	5.94401e-190	10.6794	0.269	0.001	1.452e-185	Lung	N0
Flvcr2	1.25531e-189	12.4243	0.209	0	3.06647e-185	Lung	N0
S100a10	5.81702e-185	7.05387	0.627	0.021	1.42098e-180	Lung	N0
Ms4a8a	6.50166e-179	10.046	0.224	0	1.58823e-174	Lung	N0
Adarb1	4.77112e-177	8.82746	0.254	0.001	1.16549e-172	Lung	N0
Bcl2a1a	1.09296e-171	8.21891	0.358	0.005	2.66988e-167	Lung	N0
Mertk	2.14795e-164	8.70672	0.239	0.001	5.24701e-160	Lung	N0
Dst	9.90208e-163	8.97356	0.299	0.003	2.41888e-158	Lung	N0
Lmna	1.21042e-161	6.11073	0.612	0.024	2.95681e-157	Lung	N0
Il1a	7.7298e-160	9.92046	0.224	0.001	1.88824e-155	Lung	N0
Kcnip4	8.23362e-157	10.8569	0.239	0.001	2.01131e-152	Lung	N0
Lgals1	9.76505e-155	7.11433	0.507	0.016	2.38541e-150	Lung	N0
Bcl2a1b	2.04343e-152	7.47608	0.478	0.014	4.9917e-148	Lung	N0
Axl	1.95759e-151	7.98658	0.284	0.003	4.78201e-147	Lung	N0
Acaa1b	2.51957e-149	12.0519	0.164	0	6.15479e-145	Lung	N0
Fcgrt	3.69951e-139	8.80531	0.209	0.001	9.03716e-135	Lung	N0
Fabp4	4.13012e-139	9.2011	0.209	0.001	1.00891e-134	Lung	N0
Marco	1.06293e-136	10.504	0.164	0	2.59653e-132	Lung	N0
F7	1.23368e-131	8.03809	0.224	0.002	3.01362e-127	Lung	N0
Lepr	4.19331e-126	9.29291	0.164	0	1.02434e-121	Lung	N0
Ahnak	1.26857e-123	6.96605	0.358	0.009	3.09886e-119	Lung	N0
Sh3pxd2b	2.02883e-123	10.296	0.149	0	4.95602e-119	Lung	N0
Car4	1.76305e-122	11.8785	0.134	0	4.30679e-118	Lung	N0
F11r	6.46146e-121	7.49442	0.224	0.002	1.5784e-116	Lung	N0
Sulf2	6.45173e-120	7.80318	0.194	0.001	1.57603e-115	Lung	N0
Mmp19	6.98006e-120	7.96798	0.209	0.002	1.70509e-115	Lung	N0
Cd2	6.80518e-116	6.64115	0.299	0.006	1.66237e-111	Lung	N0
Tcf7l2	1.09723e-109	7.1615	0.343	0.01	2.68032e-105	Lung	N0
Fmn1	4.6014e-109	10.9903	0.119	0	1.12403e-104	Lung	N0
Adrb1	4.6014e-109	11.2452	0.119	0	1.12403e-104	Lung	N0
Evl	1.46191e-108	6.20965	0.313	0.008	3.57116e-104	Lung	N0
Egr2	2.66252e-108	7.7488	0.194	0.002	6.504e-104	Lung	N0
Clec4n	9.39193e-107	7.0896	0.284	0.006	2.29426e-102	Lung	N0
Slc9a4	3.25949e-104	8.45803	0.149	0.001	7.96229e-100	Lung	N0
Wwtr1	2.76512e-103	8.71624	0.194	0.002	6.75463e-99	Lung	N0
Gpr137b	5.02311e-102	7.26333	0.179	0.002	1.22705e-97	Lung	N0
Myof	4.47237e-101	7.15074	0.209	0.003	1.09251e-96	Lung	N0
Lpin1	2.3216e-100	6.81727	0.224	0.004	5.6712e-96	Lung	N0
Flt1	2.77507e-100	6.60684	0.224	0.004	6.77895e-96	Lung	N0
Tbc1d9	3.26797e-100	7.12866	0.224	0.004	7.983e-96	Lung	N0
Cd302	5.35344e-100	7.0211	0.284	0.007	1.30774e-95	Lung	N0
Rhoc	2.86446e-97	7.04236	0.209	0.003	6.9973e-93	Lung	N0
Rgs1	5.48953e-96	6.26691	0.299	0.009	1.34098e-91	Lung	N0
Mcoln3	1.19263e-95	10.5206	0.104	0	2.91336e-91	Lung	N0
Agmo	1.19263e-95	10.3457	0.104	0	2.91336e-91	Lung	N0
Wfdc10	1.19263e-95	10.9576	0.104	0	2.91336e-91	Lung	N0
Ereg	1.19263e-95	11.7481	0.104	0	2.91336e-91	Lung	N0
Ccl6	6.27246e-93	6.50559	0.597	0.046	1.53224e-88	Lung	N0
Pvt1	9.68703e-92	5.9928	0.284	0.008	2.36635e-87	Lung	N0
Capn2	6.42016e-88	6.78411	0.179	0.002	1.56832e-83	Lung	N0
Lrp1	4.49019e-87	6.1107	0.254	0.007	1.09686e-82	Lung	N0
Pmepa1	5.51841e-87	7.15469	0.194	0.003	1.34804e-82	Lung	N0
Bhlhe41	1.9932e-84	7.95253	0.134	0.001	4.869e-80	Lung	N0
Pparg	5.5375e-84	6.45761	0.269	0.008	1.3527e-79	Lung	N0
Bzw2	1.03797e-83	5.35544	0.418	0.023	2.53554e-79	Lung	N0
Cxcl1	1.30487e-83	10.572	0.104	0	3.18753e-79	Lung	N0
Lilra5	1.30487e-83	9.31336	0.104	0	3.18753e-79	Lung	N0
Epcam	1.30487e-83	9.2609	0.104	0	3.18753e-79	Lung	N0
Nlrp3	2.63373e-82	5.65147	0.403	0.022	6.43369e-78	Lung	N0
Cd68	1.10064e-80	6.52309	0.328	0.014	2.68864e-76	Lung	N0
Camk1	1.28866e-79	5.98805	0.313	0.013	3.14793e-75	Lung	N0
Cdc42bpb	4.72082e-79	8.1746	0.119	0.001	1.1532e-74	Lung	N0
Tns1	9.94073e-79	6.87797	0.224	0.006	2.42832e-74	Lung	N0
Ctsc	7.1448e-78	6.07277	0.433	0.027	1.74533e-73	Lung	N0
Fabp5	4.54097e-77	6.48451	0.373	0.02	1.10927e-72	Lung	N0
Klf4	4.95714e-76	6.07981	0.299	0.012	1.21093e-71	Lung	N0
Ifi207	5.14498e-74	7.11223	0.179	0.003	1.25682e-69	Lung	N0
Lrp12	5.15836e-72	6.14707	0.299	0.013	1.26008e-67	Lung	N0
Hivep3	3.17184e-71	6.78625	0.179	0.004	7.74816e-67	Lung	N0
Amz1	7.70928e-71	6.48044	0.149	0.002	1.88322e-66	Lung	N0
Rasgef1b	1.66318e-68	5.70476	0.284	0.012	4.06282e-64	Lung	N0
Card11	2.72934e-64	5.40171	0.254	0.01	6.66724e-60	Lung	N0
Pros1	2.87646e-64	6.81941	0.134	0.002	7.02661e-60	Lung	N0
Emp1	3.26182e-64	7.2465	0.134	0.002	7.96798e-60	Lung	N0
Cd36	3.42035e-64	5.55804	0.224	0.008	8.35523e-60	Lung	N0
Nol4l	5.99042e-64	6.62929	0.149	0.003	1.46334e-59	Lung	N0
Bckdhb	2.67914e-62	6.49521	0.194	0.006	6.5446e-58	Lung	N0
Nrp2	3.33457e-62	7.12192	0.164	0.004	8.1457e-58	Lung	N0
P2rx7	6.59836e-62	7.12509	0.119	0.001	1.61185e-57	Lung	N0
Atf3	1.32325e-61	5.85012	0.313	0.017	3.23243e-57	Lung	N0
Ptgfrn	1.29236e-60	7.2498	0.104	0.001	3.15698e-56	Lung	N0
Fam89a	1.29236e-60	7.76013	0.104	0.001	3.15698e-56	Lung	N0
Maff	1.84041e-60	5.98103	0.224	0.008	4.49576e-56	Lung	N0
Ifi30	5.58528e-60	5.01035	0.522	0.057	1.36437e-55	Lung	N0
Slc8a1	1.23862e-59	5.65578	0.179	0.005	3.02569e-55	Lung	N0
Niban2	1.15024e-58	5.60794	0.209	0.007	2.80981e-54	Lung	N0
Mrps6	6.32697e-58	5.8879	0.179	0.005	1.54555e-53	Lung	N0
Cpne5	2.52051e-57	6.53501	0.134	0.002	6.1571e-53	Lung	N0
Pld3	1.25119e-56	5.39006	0.284	0.016	3.0564e-52	Lung	N0
Rnf180	4.31278e-56	6.03984	0.209	0.008	1.05353e-51	Lung	N0
Sbf2	9.16775e-56	6.43223	0.149	0.003	2.2395e-51	Lung	N0
Plxnb2	1.15829e-55	5.9076	0.149	0.003	2.82946e-51	Lung	N0
Dusp3	2.29811e-54	6.82292	0.134	0.003	5.61383e-50	Lung	N0
Nupr1	4.92733e-54	7.10468	0.119	0.002	1.20365e-49	Lung	N0
Pld4	1.41254e-53	5.77864	0.164	0.005	3.45054e-49	Lung	N0
Slc15a3	2.55279e-53	5.5572	0.269	0.015	6.23596e-49	Lung	N0
Rftn1	8.34921e-53	4.48959	0.313	0.021	2.03954e-48	Lung	N0
Luzp1	1.89309e-52	5.63719	0.209	0.009	4.62444e-48	Lung	N0
Camk2d	5.2085e-52	4.28947	0.433	0.043	1.27233e-47	Lung	N0
Dock4	1.05884e-51	6.3181	0.194	0.007	2.58655e-47	Lung	N0
Dse	3.5671e-51	6.92088	0.104	0.001	8.71372e-47	Lung	N0
Tgm2	2.14451e-50	6.39186	0.209	0.009	5.23862e-46	Lung	N0
Rora	2.16575e-50	5.56861	0.194	0.008	5.2905e-46	Lung	N0
Frmd4a	3.37531e-48	5.83273	0.239	0.013	8.2452e-44	Lung	N0
Clec4a3	1.4435e-47	5.84526	0.149	0.004	3.52619e-43	Lung	N0
Ccl2	1.9432e-47	7.0654	0.104	0.002	4.74686e-43	Lung	N0
Rhoq	4.05765e-47	5.93779	0.134	0.003	9.91202e-43	Lung	N0
Hebp1	4.76212e-47	3.70743	0.358	0.031	1.16329e-42	Lung	N0
Mitf	3.94113e-46	5.51598	0.239	0.014	9.6274e-42	Lung	N0
Itgax	3.91864e-45	6.24276	0.134	0.004	9.57246e-41	Lung	N0
AU020206	6.11026e-45	4.86381	0.388	0.04	1.49261e-40	Lung	N0
Abcg1	1.16193e-44	5.43242	0.403	0.044	2.83835e-40	Lung	N0
Slc9a7	1.80305e-44	4.60184	0.224	0.012	4.4045e-40	Lung	N0
Prdx1	5.30383e-44	4.73121	0.761	0.201	1.29562e-39	Lung	N0
Tnfaip3	9.73282e-44	4.68028	0.433	0.052	2.37753e-39	Lung	N0
Adgrl3	4.05822e-43	6.10174	0.164	0.006	9.91343e-39	Lung	N0
Lpp	7.38764e-43	4.65201	0.343	0.032	1.80465e-38	Lung	N0
Tmcc3	7.78317e-43	5.62737	0.224	0.013	1.90127e-38	Lung	N0
Fn1	1.40809e-42	5.55361	0.149	0.005	3.43969e-38	Lung	N0
Lipa	2.92087e-42	5.07557	0.299	0.025	7.13511e-38	Lung	N0
Shisa5	3.72625e-42	4.59733	0.358	0.036	9.10249e-38	Lung	N0
Ext1	5.59614e-42	4.05763	0.343	0.032	1.36702e-37	Lung	N0
Slc25a4	6.399e-41	5.30789	0.179	0.008	1.56315e-36	Lung	N0
Trf	8.2857e-41	5.41733	0.358	0.038	2.02403e-36	Lung	N0
Ccnd2	1.07486e-40	5.34078	0.194	0.01	2.62568e-36	Lung	N0
Pkib	1.11625e-40	4.75019	0.164	0.007	2.72678e-36	Lung	N0
Lima1	3.74649e-40	4.99348	0.343	0.035	9.15193e-36	Lung	N0
Cstb	2.08709e-39	4.72262	0.567	0.107	5.09834e-35	Lung	N0
Clec7a	3.46874e-39	4.76836	0.388	0.046	8.47343e-35	Lung	N0
Cxcl2	3.7303e-39	5.81208	0.507	0.08	9.11238e-35	Lung	N0
Plek	3.74133e-39	4.31334	0.701	0.178	9.13933e-35	Lung	N0
Myo1e	5.16129e-39	4.30584	0.269	0.021	1.2608e-34	Lung	N0
Htr2c	5.18993e-39	6.51064	0.119	0.003	1.2678e-34	Lung	N0
Tjp2	1.69084e-38	5.92116	0.134	0.005	4.13038e-34	Lung	N0
Akr1b3	1.71427e-38	3.87682	0.493	0.08	4.18761e-34	Lung	N0
Lsmem1	1.96588e-38	5.68695	0.134	0.005	4.80226e-34	Lung	N0
Ralgds	2.29457e-38	5.19927	0.209	0.013	5.60518e-34	Lung	N0
Hspe1	5.11989e-38	3.49577	0.552	0.099	1.25069e-33	Lung	N0
A930007I19Rik	9.6618e-38	5.30019	0.149	0.006	2.36018e-33	Lung	N0
Pid1	1.35477e-37	5.73419	0.164	0.008	3.30944e-33	Lung	N0
Anxa4	1.46174e-37	5.55565	0.179	0.009	3.57075e-33	Lung	N0
Lpxn	3.94317e-37	4.40771	0.239	0.017	9.63238e-33	Lung	N0
Tlr2	5.08313e-37	5.23739	0.358	0.042	1.24171e-32	Lung	N0
Txndc5	5.49951e-37	5.04454	0.134	0.005	1.34342e-32	Lung	N0
Pim1	6.61648e-37	3.44155	0.627	0.139	1.61627e-32	Lung	N0
Large1	2.09938e-36	5.46928	0.194	0.011	5.12837e-32	Lung	N0
Gngt2	4.87922e-36	4.9273	0.239	0.018	1.1919e-31	Lung	N0
AI504432	7.6076e-36	5.70682	0.134	0.005	1.85838e-31	Lung	N0
Havcr2	8.08951e-36	5.90405	0.134	0.005	1.97611e-31	Lung	N0
Cd48	1.81745e-35	5.24889	0.239	0.018	4.43967e-31	Lung	N0
H2-Aa	4.30364e-35	3.95066	0.328	0.035	1.05129e-30	Lung	N0
Hmgn1	4.32332e-35	3.9035	0.313	0.032	1.0561e-30	Lung	N0
Mt2	7.22952e-35	5.103	0.299	0.03	1.76603e-30	Lung	N0
Cdk14	1.45208e-34	5.27877	0.194	0.012	3.54715e-30	Lung	N0
Ccl9	3.88661e-34	6.0305	0.119	0.004	9.49422e-30	Lung	N0
Colgalt1	4.40659e-34	4.38947	0.373	0.05	1.07644e-29	Lung	N0
Epb41l2	6.62275e-34	3.88673	0.418	0.063	1.6178e-29	Lung	N0
Ldlrad4	6.82135e-34	5.45344	0.209	0.015	1.66632e-29	Lung	N0
Dusp1	7.20628e-34	4.18819	0.582	0.127	1.76035e-29	Lung	N0
Il1b	7.80947e-34	4.6877	0.373	0.048	1.9077e-29	Lung	N0
Irf8	9.13052e-34	4.70006	0.194	0.012	2.2304e-29	Lung	N0
H2-DMa	1.28405e-33	4.49782	0.299	0.031	3.13668e-29	Lung	N0
Cracd	1.96605e-33	4.21652	0.269	0.025	4.80268e-29	Lung	N0
Trps1	2.49761e-33	3.62691	0.463	0.078	6.10117e-29	Lung	N0
Mgst3	3.10793e-33	2.53491	0.373	0.047	7.59205e-29	Lung	N0
Zeb2	4.41825e-33	4.15757	0.567	0.123	1.07929e-28	Lung	N0
Fth1	5.79187e-33	3.85364	1	0.973	1.41484e-28	Lung	N0
Kynu	6.35482e-33	5.44689	0.104	0.003	1.55236e-28	Lung	N0
Tmbim1	7.6756e-33	4.92166	0.164	0.009	1.87499e-28	Lung	N0
Mak	7.70194e-33	5.9304	0.119	0.004	1.88143e-28	Lung	N0
Tmem109	8.27702e-33	5.41923	0.119	0.004	2.02191e-28	Lung	N0
Ptms	1.58138e-32	4.79107	0.463	0.083	3.863e-28	Lung	N0
S100a4	5.93158e-32	5.97488	0.164	0.009	1.44897e-27	Lung	N0
Ctsa	1.23521e-31	4.55103	0.299	0.034	3.01738e-27	Lung	N0
Mpeg1	2.08258e-31	4.55641	0.373	0.054	5.08732e-27	Lung	N0
P2ry14	2.29067e-31	5.79991	0.104	0.003	5.59565e-27	Lung	N0
Rassf4	1.7909e-30	5.18375	0.134	0.006	4.37481e-26	Lung	N0
Cdc14b	2.1479e-30	5.32581	0.149	0.008	5.2469e-26	Lung	N0
Rexo2	3.35932e-30	3.93772	0.418	0.071	8.20615e-26	Lung	N0
Selenow	5.01831e-30	3.96279	0.299	0.034	1.22587e-25	Lung	N0
Cd74	1.38037e-29	4.00815	0.328	0.042	3.37197e-25	Lung	N0
Prkch	1.51088e-29	4.49741	0.209	0.017	3.69078e-25	Lung	N0
Fxyd5	3.69625e-29	3.57711	0.672	0.219	9.02919e-25	Lung	N0
Wfdc17	3.75566e-29	2.2878	0.358	0.048	9.17433e-25	Lung	N0
Acod1	4.35989e-29	3.99837	0.328	0.043	1.06503e-24	Lung	N0
Ear2	7.49624e-29	5.42058	0.493	0.107	1.83118e-24	Lung	N0
Scpep1	9.30792e-29	5.12172	0.134	0.007	2.27374e-24	Lung	N0
Cd83	1.08712e-28	4.99071	0.179	0.013	2.65562e-24	Lung	N0
Lgmn	1.45258e-28	4.2652	0.179	0.013	3.54836e-24	Lung	N0
Basp1	2.8413e-28	5.05719	0.164	0.011	6.94073e-24	Lung	N0
Vav2	3.33443e-28	4.98004	0.119	0.005	8.14536e-24	Lung	N0
H2-Ab1	6.88768e-28	3.78667	0.299	0.037	1.68252e-23	Lung	N0
Septin11	9.69473e-28	4.01367	0.373	0.061	2.36823e-23	Lung	N0
Pde4dip	1.63556e-27	4.79261	0.179	0.013	3.99535e-23	Lung	N0
Cytip	2.04724e-27	3.64399	0.507	0.118	5.001e-23	Lung	N0
Il6st	2.42134e-27	5.53765	0.104	0.004	5.91486e-23	Lung	N0
Abhd12	3.03972e-27	4.33028	0.313	0.043	7.42542e-23	Lung	N0
Selenop	4.72715e-27	4.26793	0.269	0.032	1.15475e-22	Lung	N0
Dusp5	6.35805e-27	4.63692	0.239	0.025	1.55315e-22	Lung	N0
Anxa5	6.64455e-27	3.96032	0.537	0.14	1.62313e-22	Lung	N0
Tpd52	8.23286e-27	3.71484	0.463	0.098	2.01112e-22	Lung	N0
Sqstm1	8.82868e-27	4.80872	0.418	0.08	2.15667e-22	Lung	N0
Phgdh	9.97881e-27	4.27237	0.224	0.022	2.43762e-22	Lung	N0
Cd200r4	1.69695e-26	5.06436	0.149	0.009	4.14532e-22	Lung	N0
Ifrd1	1.78774e-26	3.75877	0.612	0.194	4.36709e-22	Lung	N0
Rufy4	1.80253e-26	5.889	0.119	0.006	4.40323e-22	Lung	N0
Pdlim1	4.7136e-26	4.45182	0.239	0.026	1.15144e-21	Lung	N0
Tanc2	6.79571e-26	5.09266	0.149	0.01	1.66006e-21	Lung	N0
Crip1	1.3543e-25	4.3771	0.343	0.054	3.30829e-21	Lung	N0
Siglecf	1.79454e-25	4.99854	0.164	0.012	4.38371e-21	Lung	N0
P2ry10b	2.23844e-25	5.09437	0.149	0.01	5.46805e-21	Lung	N0
Picalm	5.04707e-25	2.93502	0.627	0.206	1.2329e-20	Lung	N0
Nme2	5.17206e-25	3.28695	0.657	0.23	1.26343e-20	Lung	N0
Clec4d	5.635e-25	4.27182	0.328	0.051	1.37652e-20	Lung	N0
Tmsb10	1.09641e-24	3.01562	0.896	0.64	2.6783e-20	Lung	N0
Hsph1	1.42196e-24	4.12771	0.194	0.018	3.47357e-20	Lung	N0
Cd274	2.80545e-24	4.32405	0.194	0.018	6.85316e-20	Lung	N0
Bcar3	3.25816e-24	3.98136	0.343	0.058	7.95902e-20	Lung	N0
Foxo1	5.79972e-24	3.40857	0.179	0.015	1.41676e-19	Lung	N0
Ly86	6.19918e-24	4.23784	0.164	0.013	1.51434e-19	Lung	N0
Dip2c	9.74306e-24	4.39973	0.284	0.04	2.38004e-19	Lung	N0
AW112010	1.72661e-23	4.6241	0.284	0.041	4.21777e-19	Lung	N0
Mtss1	2.25792e-23	3.13024	0.403	0.083	5.51564e-19	Lung	N0
Mob3b	2.58944e-23	5.17112	0.179	0.016	6.32549e-19	Lung	N0
Prdm1	2.83892e-23	5.10847	0.104	0.005	6.93491e-19	Lung	N0
Arhgef12	5.16199e-23	3.67733	0.194	0.019	1.26097e-18	Lung	N0
Naaa	1.64082e-22	4.0766	0.284	0.043	4.00819e-18	Lung	N0
Tfec	2.79783e-22	3.88959	0.269	0.038	6.83455e-18	Lung	N0
Myadm	4.0325e-22	4.53025	0.179	0.017	9.85058e-18	Lung	N0
Icam1	4.20061e-22	4.74941	0.149	0.012	1.02612e-17	Lung	N0
Ifitm1	6.06643e-22	3.01769	0.299	0.044	1.48191e-17	Lung	N0
Cebpa	1.02049e-21	3.98504	0.269	0.039	2.49285e-17	Lung	N0
Jund	1.04843e-21	1.74115	0.896	0.624	2.56112e-17	Lung	N0
Tecpr1	1.69696e-21	5.05243	0.119	0.008	4.14533e-17	Lung	N0
Rara	3.06683e-21	4.35246	0.179	0.018	7.49166e-17	Lung	N0
Lap3	6.0696e-21	4.40166	0.149	0.012	1.48268e-16	Lung	N0
Ctnnd1	6.40285e-21	3.92473	0.239	0.032	1.56409e-16	Lung	N0
Slc7a8	6.42887e-21	4.67247	0.134	0.01	1.57044e-16	Lung	N0
Pik3ap1	9.32404e-21	3.33017	0.493	0.143	2.27768e-16	Lung	N0
Dhrs7b	1.72781e-20	3.94152	0.254	0.037	4.22068e-16	Lung	N0
Cd2ap	1.83981e-20	4.33487	0.149	0.013	4.49428e-16	Lung	N0
Zc3h12d	3.15294e-20	4.91513	0.104	0.006	7.702e-16	Lung	N0
Rxra	6.82993e-20	4.84662	0.119	0.008	1.66842e-15	Lung	N0
Sgms1	7.07916e-20	3.2813	0.328	0.063	1.7293e-15	Lung	N0
Abi2	7.45253e-20	4.33856	0.119	0.008	1.8205e-15	Lung	N0
Egr1	1.17316e-19	4.66683	0.313	0.058	2.86579e-15	Lung	N0
Ppp1r15a	1.29289e-19	3.50805	0.284	0.047	3.15826e-15	Lung	N0
Fkbp1a	1.75185e-19	3.68913	0.269	0.044	4.27942e-15	Lung	N0
Itga5	2.00282e-19	3.88005	0.194	0.023	4.89249e-15	Lung	N0
Znrf3	3.27496e-19	4.31474	0.149	0.014	8.00008e-15	Lung	N0
Tnfrsf12a	4.87385e-19	4.82842	0.104	0.007	1.19059e-14	Lung	N0
Tpm4	6.41841e-19	3.90229	0.179	0.02	1.56789e-14	Lung	N0
Rplp1	1.27079e-18	1.62139	0.91	0.89	3.10428e-14	Lung	N0
Gm2a	1.6367e-18	4.28007	0.179	0.02	3.99813e-14	Lung	N0
H2-Eb1	1.72673e-18	3.69089	0.239	0.035	4.21806e-14	Lung	N0
Jchain	2.19949e-18	3.7499	0.119	0.009	5.37291e-14	Lung	N0
Hsp90ab1	3.0941e-18	2.37194	0.791	0.518	7.55826e-14	Lung	N0
Hsd3b7	3.34431e-18	5.23653	0.134	0.012	8.16947e-14	Lung	N0
Clic4	4.37268e-18	3.29219	0.507	0.173	1.06816e-13	Lung	N0
Junb	4.80097e-18	2.86616	0.627	0.279	1.17278e-13	Lung	N0
Trim25	6.06633e-18	4.12729	0.284	0.053	1.48188e-13	Lung	N0
Socs3	6.39805e-18	5.36394	0.104	0.007	1.56292e-13	Lung	N0
Sdk1	1.12135e-17	4.1868	0.149	0.015	2.73924e-13	Lung	N0
Il1rn	1.66574e-17	4.65837	0.224	0.034	4.06907e-13	Lung	N0
Abca1	1.887e-17	4.77329	0.134	0.012	4.60955e-13	Lung	N0
Grap2	2.02503e-17	4.1707	0.119	0.009	4.94675e-13	Lung	N0
Arhgap24	2.03926e-17	3.80015	0.209	0.029	4.98151e-13	Lung	N0
Hpgds	2.52369e-17	4.50728	0.104	0.007	6.16486e-13	Lung	N0
Hspa9	2.68862e-17	2.89902	0.388	0.102	6.56775e-13	Lung	N0
Nenf	2.6904e-17	4.00332	0.179	0.022	6.5721e-13	Lung	N0
Hspa8	2.77562e-17	2.17018	0.806	0.795	6.78029e-13	Lung	N0
Calr	4.80742e-17	2.39255	0.507	0.171	1.17436e-12	Lung	N0
Slc16a10	6.58511e-17	3.44693	0.328	0.073	1.60861e-12	Lung	N0
Rps11	6.69131e-17	1.441	0.925	0.971	1.63455e-12	Lung	N0
Irf5	6.97103e-17	4.19065	0.104	0.008	1.70288e-12	Lung	N0
Sirpb1c	7.25791e-17	5.04808	0.119	0.01	1.77296e-12	Lung	N0
Ftl1	7.74787e-17	2.86367	0.97	0.945	1.89265e-12	Lung	N0
Ftl1-ps1	8.47825e-17	3.71324	0.388	0.106	2.07107e-12	Lung	N0
Spag9	8.98905e-17	2.14585	0.642	0.301	2.19585e-12	Lung	N0
Ctsz	1.01353e-16	3.42748	0.507	0.188	2.47586e-12	Lung	N0
Atp2b1	1.07038e-16	2.02281	0.642	0.311	2.61473e-12	Lung	N0
Dusp2	1.12155e-16	3.12927	0.194	0.026	2.73973e-12	Lung	N0
Creb5	1.25783e-16	4.84182	0.179	0.023	3.07263e-12	Lung	N0
Plin2	1.49162e-16	4.11793	0.507	0.195	3.64372e-12	Lung	N0
Zfp36l1	1.74599e-16	2.94089	0.239	0.039	4.26511e-12	Lung	N0
Nrip1	1.81817e-16	3.63492	0.194	0.027	4.44141e-12	Lung	N0
Snx5	2.49262e-16	2.83171	0.373	0.098	6.08898e-12	Lung	N0
Sh2d1b1	2.97387e-16	4.42877	0.164	0.02	7.26458e-12	Lung	N0
Prkn	3.57547e-16	5.09643	0.119	0.01	8.73417e-12	Lung	N0
Cd14	4.47519e-16	4.08356	0.463	0.155	1.0932e-11	Lung	N0
Dpysl2	4.83777e-16	3.6146	0.239	0.042	1.18177e-11	Lung	N0
Eps8	5.15194e-16	4.4749	0.104	0.008	1.25852e-11	Lung	N0
Tnfrsf13c	6.22309e-16	4.25317	0.104	0.008	1.52018e-11	Lung	N0
Npm1	7.75029e-16	2.42934	0.731	0.47	1.89324e-11	Lung	N0
Akr1a1	8.78667e-16	2.81789	0.463	0.162	2.14641e-11	Lung	N0
Mdfic	9.22759e-16	3.78154	0.194	0.028	2.25411e-11	Lung	N0
Clec4e	9.65571e-16	3.09655	0.403	0.116	2.3587e-11	Lung	N0
Tnfrsf1b	1.04128e-15	3.4178	0.328	0.079	2.54363e-11	Lung	N0
Sec24a	1.376e-15	3.84572	0.299	0.066	3.3613e-11	Lung	N0
Cnksr3	1.63029e-15	4.12959	0.119	0.011	3.98247e-11	Lung	N0
Rab8b	1.76482e-15	2.45586	0.612	0.312	4.3111e-11	Lung	N0
Lncpint	1.94676e-15	3.58294	0.269	0.053	4.75553e-11	Lung	N0
Gramd4	1.9845e-15	4.04279	0.134	0.014	4.84773e-11	Lung	N0
Hmox1	2.04779e-15	5.12075	0.299	0.067	5.00234e-11	Lung	N0
Glul	2.12171e-15	3.76094	0.269	0.054	5.18291e-11	Lung	N0
Aim2	2.22262e-15	3.42847	0.239	0.043	5.42942e-11	Lung	N0
Cyth3	2.2261e-15	3.71265	0.194	0.029	5.43791e-11	Lung	N0
Irf4	2.29963e-15	4.02947	0.119	0.011	5.61753e-11	Lung	N0
Hsd17b4	3.2333e-15	3.81961	0.224	0.039	7.8983e-11	Lung	N0
Ablim1	3.58614e-15	4.03965	0.149	0.017	8.76023e-11	Lung	N0
Prkca	3.8031e-15	4.4744	0.134	0.014	9.29022e-11	Lung	N0
Eef1a1	4.43692e-15	1.39051	0.94	0.961	1.08385e-10	Lung	N0
Arhgap17	4.93475e-15	3.08755	0.343	0.088	1.20546e-10	Lung	N0
Rpl30	5.71817e-15	1.26712	0.925	0.958	1.39683e-10	Lung	N0
Psap	5.77488e-15	3.98067	0.537	0.244	1.41069e-10	Lung	N0
Trio	6.5801e-15	3.22287	0.254	0.05	1.60739e-10	Lung	N0
Ucp2	7.59618e-15	1.95454	0.761	0.58	1.85559e-10	Lung	N0
Il13ra1	8.13089e-15	4.46845	0.104	0.009	1.98621e-10	Lung	N0
Prdx4	8.26853e-15	3.17588	0.179	0.025	2.01984e-10	Lung	N0
Thbs1	1.00602e-14	3.37033	0.284	0.06	2.4575e-10	Lung	N0
Zfp36	1.08162e-14	3.16542	0.507	0.203	2.64219e-10	Lung	N0
Aplp2	1.18149e-14	3.4961	0.313	0.077	2.88614e-10	Lung	N0
Mrpl52	1.36926e-14	2.8844	0.343	0.09	3.34483e-10	Lung	N0
Eef2	1.69165e-14	2.06281	0.657	0.373	4.13236e-10	Lung	N0
Cd300c2	1.70229e-14	3.7662	0.284	0.064	4.15835e-10	Lung	N0
Adamts6	1.85386e-14	3.82207	0.104	0.009	4.5286e-10	Lung	N0
Hacd3	1.87059e-14	3.94912	0.104	0.009	4.56948e-10	Lung	N0
Tbxas1	2.58322e-14	4.19035	0.179	0.026	6.31029e-10	Lung	N0
Rpl22	3.00927e-14	1.5074	0.881	0.815	7.35104e-10	Lung	N0
Slc7a11	3.14557e-14	3.02601	0.343	0.09	7.68401e-10	Lung	N0
Npc1	3.31404e-14	3.46968	0.194	0.031	8.09554e-10	Lung	N0
Cisd1	3.39307e-14	3.08458	0.269	0.058	8.2886e-10	Lung	N0
Ppp1r16b	3.66465e-14	3.66207	0.149	0.018	8.952e-10	Lung	N0
Laptm5	4.25758e-14	2.60199	0.672	0.456	1.04004e-09	Lung	N0
Ly6e	4.39031e-14	2.83243	0.299	0.07	1.07246e-09	Lung	N0
Ube2o	4.93048e-14	3.86852	0.119	0.012	1.20442e-09	Lung	N0
Ccrl2	6.04491e-14	4.01106	0.224	0.042	1.47665e-09	Lung	N0
Rnf149	6.19499e-14	3.25608	0.284	0.065	1.51331e-09	Lung	N0
Acox1	6.84805e-14	4.42145	0.239	0.048	1.67284e-09	Lung	N0
Cyb5a	7.1349e-14	3.02407	0.388	0.122	1.74291e-09	Lung	N0
Grik3	8.17026e-14	3.45372	0.284	0.067	1.99583e-09	Lung	N0
Comt	1.00265e-13	3.39434	0.269	0.059	2.44928e-09	Lung	N0
Snx30	1.5542e-13	3.81411	0.134	0.016	3.7966e-09	Lung	N0
Hivep2	2.23642e-13	3.35236	0.164	0.024	5.46312e-09	Lung	N0
mt-Nd2	2.34263e-13	2.54638	0.582	0.292	5.72257e-09	Lung	N0
Rps8	2.50505e-13	1.03511	0.955	0.985	6.11934e-09	Lung	N0
Snx10	2.57302e-13	3.2099	0.328	0.092	6.28537e-09	Lung	N0
Ccl3	3.00957e-13	3.31982	0.358	0.104	7.35177e-09	Lung	N0
Pebp1	3.17308e-13	2.46583	0.328	0.09	7.75121e-09	Lung	N0
Sh3glb1	3.27436e-13	2.71176	0.418	0.146	7.99861e-09	Lung	N0
Mbnl2	3.57767e-13	2.5296	0.522	0.239	8.73954e-09	Lung	N0
Gnl3	4.12701e-13	3.63818	0.164	0.024	1.00815e-08	Lung	N0
Kcnq5	4.77579e-13	3.48105	0.164	0.024	1.16663e-08	Lung	N0
Id3	4.89015e-13	3.30067	0.104	0.01	1.19456e-08	Lung	N0
Mzb1	6.8047e-13	3.7962	0.134	0.017	1.66225e-08	Lung	N0
Rps5	7.29321e-13	1.18309	0.94	0.932	1.78159e-08	Lung	N0
Kcnn3	7.56027e-13	4.22716	0.119	0.013	1.84682e-08	Lung	N0
Rel	7.76625e-13	2.47033	0.507	0.222	1.89714e-08	Lung	N0
Sdcbp	7.91577e-13	2.52316	0.657	0.446	1.93366e-08	Lung	N0
Prcp	7.9211e-13	3.40732	0.239	0.051	1.93497e-08	Lung	N0
Laptm4a	8.77107e-13	2.86661	0.388	0.132	2.1426e-08	Lung	N0
Rpl37a	9.21245e-13	0.94258	0.94	0.996	2.25042e-08	Lung	N0
Rpl19	9.81095e-13	1.1392	0.94	0.974	2.39662e-08	Lung	N0
Ptprcap	9.83346e-13	3.72878	0.179	0.029	2.40212e-08	Lung	N0
Rps13	1.24546e-12	1.20068	0.94	0.991	3.04241e-08	Lung	N0
Rasgrp3	1.83325e-12	3.31353	0.119	0.014	4.47827e-08	Lung	N0
Eif4a1	1.9145e-12	1.58671	0.821	0.685	4.67674e-08	Lung	N0
Abl2	2.47349e-12	3.23851	0.239	0.053	6.04225e-08	Lung	N0
Slc23a2	2.50325e-12	3.27863	0.299	0.081	6.11495e-08	Lung	N0
Creg1	2.7486e-12	2.54886	0.403	0.145	6.71427e-08	Lung	N0
Rras2	2.76868e-12	3.30493	0.119	0.014	6.76333e-08	Lung	N0
Pou2af1	3.07539e-12	3.683	0.119	0.014	7.51256e-08	Lung	N0
Usp6nl	3.22103e-12	2.7721	0.239	0.052	7.86832e-08	Lung	N0
Uba52	4.13643e-12	1.28866	0.821	0.814	1.01045e-07	Lung	N0
Eef1g	4.28577e-12	2.3057	0.418	0.152	1.04693e-07	Lung	N0
Pi4k2a	4.42476e-12	3.30277	0.179	0.031	1.08088e-07	Lung	N0
Cd44	4.45928e-12	2.48965	0.746	0.683	1.08931e-07	Lung	N0
Rpl41	4.52682e-12	0.863602	0.985	0.992	1.10581e-07	Lung	N0
Rpl35a	5.87056e-12	0.82002	0.97	1	1.43406e-07	Lung	N0
Fyn	7.36735e-12	3.21389	0.149	0.022	1.7997e-07	Lung	N0
Itm2c	7.86961e-12	4.04439	0.119	0.015	1.92239e-07	Lung	N0
Metrnl	7.90761e-12	3.48654	0.149	0.022	1.93167e-07	Lung	N0
Bag3	1.02599e-11	3.34558	0.149	0.023	2.5063e-07	Lung	N0
Chchd10	1.11448e-11	3.01234	0.164	0.026	2.72245e-07	Lung	N0
Arhgap26	1.32219e-11	2.38402	0.403	0.15	3.22985e-07	Lung	N0
Rpl13	1.4011e-11	1.06349	0.97	0.984	3.4226e-07	Lung	N0
Gm2000	1.45041e-11	2.06773	0.701	0.507	3.54307e-07	Lung	N0
Srgn	1.47651e-11	2.2121	0.776	0.492	3.60683e-07	Lung	N0
Gm47283	1.47789e-11	3.03947	0.403	0.151	3.6102e-07	Lung	N0
Gclc	1.49453e-11	2.48662	0.299	0.082	3.65084e-07	Lung	N0
Rps26	1.66605e-11	1.28948	0.925	0.939	4.06982e-07	Lung	N0
Rps4x	2.47739e-11	1.10877	0.955	0.938	6.05176e-07	Lung	N0
Csrnp1	2.68767e-11	3.41574	0.224	0.051	6.56545e-07	Lung	N0
Npc2	2.95195e-11	2.85485	0.493	0.247	7.21101e-07	Lung	N0
Snd1	3.12934e-11	2.71496	0.299	0.087	7.64434e-07	Lung	N0
Adipor2	3.28055e-11	3.04563	0.433	0.187	8.01373e-07	Lung	N0
Zswim6	3.50919e-11	3.0354	0.313	0.095	8.57224e-07	Lung	N0
Lsp1	4.72833e-11	2.25139	0.567	0.321	1.15504e-06	Lung	N0
Mrpl12	5.00352e-11	2.4947	0.343	0.116	1.22226e-06	Lung	N0
H2-DMb1	5.73678e-11	4.03811	0.104	0.012	1.40138e-06	Lung	N0
Rpl23	6.06033e-11	0.929014	0.955	0.993	1.48042e-06	Lung	N0
Blvrb	6.31311e-11	1.72267	0.313	0.091	1.54217e-06	Lung	N0
Tspan13	6.5476e-11	3.05117	0.164	0.028	1.59945e-06	Lung	N0
Rpl24	6.62809e-11	1.05604	0.91	0.955	1.61911e-06	Lung	N0
Slc49a4	6.68655e-11	2.84101	0.239	0.059	1.63339e-06	Lung	N0
Bach2	7.00352e-11	2.95419	0.179	0.033	1.71082e-06	Lung	N0
Saraf	8.57766e-11	2.92829	0.299	0.091	2.09535e-06	Lung	N0
Slc25a3	9.09802e-11	1.72651	0.657	0.466	2.22246e-06	Lung	N0
Fos	9.78016e-11	3.76165	0.403	0.162	2.3891e-06	Lung	N0
Snx24	1.06358e-10	3.451	0.224	0.053	2.5981e-06	Lung	N0
Capg	1.18023e-10	2.76756	0.388	0.151	2.88307e-06	Lung	N0
Pnrc1	1.22277e-10	2.3528	0.507	0.263	2.98699e-06	Lung	N0
Mif	1.4719e-10	2.91014	0.313	0.098	3.59557e-06	Lung	N0
Lgals3	1.58496e-10	2.71107	0.716	0.723	3.87173e-06	Lung	N0
Nme1	1.84478e-10	2.14169	0.493	0.237	4.50643e-06	Lung	N0
H2-Q7	1.86129e-10	3.30307	0.164	0.03	4.54676e-06	Lung	N0
Rpl39	2.1737e-10	1.06521	0.925	0.946	5.30991e-06	Lung	N0
Rpl10a	2.18819e-10	1.36156	0.806	0.716	5.34532e-06	Lung	N0
Polr2f	2.33082e-10	2.28435	0.373	0.143	5.69372e-06	Lung	N0
Rtraf	2.36055e-10	2.26911	0.433	0.194	5.76636e-06	Lung	N0
Afap1	2.62645e-10	3.73745	0.119	0.017	6.4159e-06	Lung	N0
H2-K1	2.62758e-10	1.82083	0.701	0.539	6.41865e-06	Lung	N0
Pla2g15	2.64138e-10	3.93335	0.119	0.017	6.45236e-06	Lung	N0
Rpl27a	2.68749e-10	0.977072	0.955	0.966	6.56499e-06	Lung	N0
Fosb	2.96318e-10	2.79032	0.537	0.301	7.23847e-06	Lung	N0
Gch1	3.50842e-10	3.28014	0.164	0.031	8.57037e-06	Lung	N0
Rpl17	3.75681e-10	0.875805	0.94	0.958	9.17714e-06	Lung	N0
Snhg15	3.77946e-10	3.52977	0.104	0.013	9.23246e-06	Lung	N0
Ms4a1	3.79041e-10	3.5735	0.119	0.017	9.25921e-06	Lung	N0
Pomp	3.97279e-10	1.57777	0.657	0.485	9.70473e-06	Lung	N0
Rps21	4.05372e-10	1.03349	0.94	0.942	9.90243e-06	Lung	N0
Traf5	4.08752e-10	3.14588	0.209	0.049	9.985e-06	Lung	N0
Cyth1	4.17663e-10	2.95073	0.299	0.095	1.02027e-05	Lung	N0
Eif1	4.7293e-10	0.970464	0.97	0.998	1.15527e-05	Lung	N0
Slc25a5	5.1904e-10	1.49284	0.687	0.551	1.26791e-05	Lung	N0
Pold4	5.66336e-10	2.90065	0.284	0.087	1.38345e-05	Lung	N0
Ptp4a2	6.13429e-10	1.58143	0.582	0.368	1.49848e-05	Lung	N0
Rps28	6.46735e-10	1.01003	0.91	0.922	1.57984e-05	Lung	N0
Rpl8	6.70107e-10	1.05854	0.925	0.943	1.63694e-05	Lung	N0
Gm14164	6.8639e-10	2.2858	0.343	0.126	1.67671e-05	Lung	N0
Iqgap1	7.01818e-10	1.71079	0.731	0.673	1.7144e-05	Lung	N0
Blk	7.69815e-10	3.08241	0.104	0.013	1.8805e-05	Lung	N0
Cd79b	8.59979e-10	2.75293	0.134	0.021	2.10076e-05	Lung	N0
Nr4a1	8.71788e-10	3.16039	0.269	0.08	2.1296e-05	Lung	N0
Slc6a6	8.90415e-10	2.33351	0.388	0.161	2.1751e-05	Lung	N0
Parvb	9.06913e-10	3.33423	0.104	0.014	2.21541e-05	Lung	N0
Camsap2	9.27677e-10	3.04698	0.119	0.017	2.26613e-05	Lung	N0
Plekho2	9.85931e-10	2.5817	0.328	0.118	2.40843e-05	Lung	N0
Ubc	9.88383e-10	1.6887	0.806	0.778	2.41442e-05	Lung	N0
Asph	1.03674e-09	3.91948	0.119	0.018	2.53254e-05	Lung	N0
Daam1	1.05097e-09	2.54493	0.299	0.095	2.56732e-05	Lung	N0
Cox4i1	1.07198e-09	0.995132	0.91	0.955	2.61864e-05	Lung	N0
Nop10	1.11275e-09	2.01704	0.448	0.209	2.71822e-05	Lung	N0
Irak2	1.12161e-09	2.68379	0.239	0.064	2.73988e-05	Lung	N0
Arhgdia	1.17297e-09	2.08908	0.537	0.334	2.86532e-05	Lung	N0
Piezo1	1.19644e-09	3.50889	0.194	0.044	2.92267e-05	Lung	N0
Rpl3	1.23511e-09	1.22411	0.851	0.816	3.01712e-05	Lung	N0
Mt1	1.26306e-09	3.71213	0.612	0.433	3.08541e-05	Lung	N0
Tmem238	1.44482e-09	3.15509	0.179	0.038	3.5294e-05	Lung	N0
Golga7	1.50948e-09	2.6052	0.328	0.121	3.68736e-05	Lung	N0
Atraid	1.73616e-09	3.01034	0.239	0.066	4.24109e-05	Lung	N0
Bst2	1.84383e-09	3.38932	0.104	0.014	4.5041e-05	Lung	N0
Atp13a3	2.03726e-09	1.97893	0.493	0.272	4.97661e-05	Lung	N0
Mapk6	2.30997e-09	2.31194	0.373	0.155	5.64279e-05	Lung	N0
Tpt1	2.51326e-09	0.698805	1	1	6.1394e-05	Lung	N0
Usp9x	2.59284e-09	2.25624	0.373	0.154	6.3338e-05	Lung	N0
Map1lc3b	2.74015e-09	1.79973	0.642	0.478	6.69364e-05	Lung	N0
Gadd45b	2.81019e-09	2.6449	0.358	0.144	6.86473e-05	Lung	N0
Scarb2	2.96936e-09	3.21125	0.239	0.068	7.25356e-05	Lung	N0
Fndc3b	3.15106e-09	2.68434	0.373	0.157	7.6974e-05	Lung	N0
Camk1d	3.25073e-09	3.02296	0.328	0.12	7.94089e-05	Lung	N0
Rps3a1	3.25107e-09	0.889644	0.955	0.982	7.94172e-05	Lung	N0
C1qbp	3.29073e-09	2.28305	0.209	0.052	8.03859e-05	Lung	N0
Iffo2	3.38576e-09	3.7008	0.104	0.015	8.27074e-05	Lung	N0
Taf4b	3.40027e-09	3.07533	0.134	0.023	8.30618e-05	Lung	N0
Rpl13a	4.06125e-09	1.22169	0.821	0.786	9.92082e-05	Lung	N0
Cct3	4.70586e-09	2.45517	0.299	0.103	0.000114955	Lung	N0
Rack1	4.75846e-09	1.20276	0.806	0.767	0.00011624	Lung	N0
Pabpc1	5.04524e-09	1.43115	0.687	0.598	0.000123245	Lung	N0
Arf4	5.07928e-09	2.40143	0.418	0.199	0.000124077	Lung	N0
Dennd4a	5.08247e-09	1.46482	0.746	0.598	0.000124155	Lung	N0
Prdx2	5.14066e-09	2.21763	0.299	0.098	0.000125576	Lung	N0
Rps27	5.57522e-09	1.06363	0.91	0.977	0.000136191	Lung	N0
Ell2	5.72167e-09	2.62934	0.269	0.085	0.000139769	Lung	N0
Cyb5r3	5.81892e-09	2.85037	0.239	0.069	0.000142144	Lung	N0
Sltm	5.90232e-09	1.78813	0.418	0.198	0.000144182	Lung	N0
Tob2	6.14565e-09	2.80559	0.224	0.061	0.000150126	Lung	N0
H2-D1	6.18321e-09	1.60633	0.776	0.784	0.000151044	Lung	N0
Cebpb	6.62583e-09	2.18754	0.731	0.823	0.000161856	Lung	N0
Nr4a2	6.66845e-09	3.78471	0.104	0.015	0.000162897	Lung	N0
Trim44	6.73344e-09	3.02248	0.179	0.041	0.000164484	Lung	N0
Tusc3	6.74845e-09	3.03822	0.224	0.062	0.000164851	Lung	N0
Rps16	7.42791e-09	0.727285	0.97	0.997	0.000181449	Lung	N0
Psmb10	7.99826e-09	3.25487	0.209	0.055	0.000195382	Lung	N0
mt-Cytb	8.20388e-09	1.34214	0.866	0.877	0.000200404	Lung	N0
Rplp0	8.71385e-09	0.962744	0.925	0.933	0.000212862	Lung	N0
Rpl10	8.98229e-09	1.54283	0.761	0.699	0.000219419	Lung	N0
Rpl36	9.21148e-09	1.22527	0.836	0.879	0.000225018	Lung	N0
Septin9	9.82634e-09	2.2706	0.463	0.259	0.000240038	Lung	N0
Ahcyl2	1.03456e-08	3.16691	0.194	0.048	0.000252723	Lung	N0
Mef2d	1.05788e-08	2.87117	0.209	0.055	0.000258419	Lung	N0
Otulin	1.09518e-08	2.67098	0.254	0.079	0.00026753	Lung	N0
Agpat4	1.12491e-08	2.70053	0.149	0.03	0.000274792	Lung	N0
Fau	1.14117e-08	0.705137	1	0.999	0.000278764	Lung	N0
Sik3	1.17848e-08	1.77567	0.537	0.334	0.000287879	Lung	N0
Mcl1	1.18407e-08	1.44467	0.657	0.507	0.000289245	Lung	N0
Ubash3b	1.18426e-08	3.20431	0.239	0.071	0.000289291	Lung	N0
Tgfbi	1.21331e-08	2.73386	0.269	0.088	0.000296388	Lung	N0
Smox	1.26629e-08	3.7716	0.134	0.025	0.000309329	Lung	N0
Gsap	1.29109e-08	2.84024	0.328	0.128	0.000315388	Lung	N0
Rps20	1.44408e-08	1.00157	0.925	0.982	0.000352761	Lung	N0
Bcl2l11	1.48056e-08	2.57479	0.313	0.116	0.000361671	Lung	N0
Marchf3	1.5096e-08	2.58098	0.239	0.069	0.000368765	Lung	N0
Litaf	1.52905e-08	1.99608	0.478	0.268	0.000373517	Lung	N0
Sgk1	1.57326e-08	3.44226	0.418	0.211	0.000384316	Lung	N0
Rpl18a	1.6132e-08	0.983793	0.94	0.965	0.000394074	Lung	N0
Ctsd	1.62792e-08	3.6357	0.567	0.43	0.000397667	Lung	N0
Ddhd1	1.66086e-08	3.23559	0.284	0.1	0.000405714	Lung	N0
Rpl26	1.67899e-08	0.997566	0.925	0.964	0.000410144	Lung	N0
Atp5g1	1.70879e-08	1.52624	0.627	0.445	0.000417423	Lung	N0
Pdrg1	1.71762e-08	3.44088	0.104	0.016	0.000419579	Lung	N0
Hspa1a	1.7781e-08	4.50179	0.134	0.025	0.000434354	Lung	N0
Tmed5	1.86851e-08	2.03802	0.418	0.21	0.000456438	Lung	N0
Rpl15	1.90784e-08	1.00721	0.925	0.922	0.000466047	Lung	N0
Rps14	1.95138e-08	0.791057	0.97	0.989	0.000476684	Lung	N0
Plxdc2	2.05098e-08	2.40162	0.313	0.119	0.000501014	Lung	N0
Atp5g2	2.16827e-08	1.25652	0.761	0.748	0.000529666	Lung	N0
Sertad2	2.24729e-08	3.12652	0.224	0.065	0.000548968	Lung	N0
Ccl4	2.25509e-08	4.27444	0.104	0.016	0.000550873	Lung	N0
Acot1	2.31413e-08	3.67677	0.104	0.016	0.000565297	Lung	N0
Wdr43	2.44108e-08	2.75689	0.209	0.057	0.000596308	Lung	N0
Rab11fip1	2.61151e-08	2.98616	0.328	0.134	0.000637939	Lung	N0
Rps27rt	2.71636e-08	2.41179	0.478	0.285	0.000663553	Lung	N0
Ankrd11	2.74524e-08	1.8194	0.552	0.366	0.000670606	Lung	N0
Cnbp	2.9108e-08	2.02362	0.448	0.244	0.000711049	Lung	N0
Rpl18	2.91523e-08	0.935045	0.91	0.967	0.000712133	Lung	N0
Fbxo11	3.0627e-08	2.24222	0.358	0.151	0.000748157	Lung	N0
Blnk	3.4129e-08	3.1758	0.104	0.016	0.000833703	Lung	N0
Mybbp1a	3.56946e-08	3.12694	0.149	0.032	0.000871947	Lung	N0
Rpl36a	3.59084e-08	0.968237	0.836	0.724	0.000877169	Lung	N0
Rps24	3.66313e-08	0.752163	0.955	0.997	0.000894829	Lung	N0
Zfand2a	3.75064e-08	2.75994	0.269	0.092	0.000916207	Lung	N0
Abr	4.01438e-08	2.63776	0.373	0.174	0.000980633	Lung	N0
Lyrm4	4.03642e-08	3.24959	0.134	0.026	0.000986018	Lung	N0
Man1a	4.04765e-08	2.59279	0.239	0.072	0.000988759	Lung	N0
Rplp2	4.32172e-08	0.750943	0.94	0.98	0.00105571	Lung	N0
Cd86	4.35847e-08	2.93742	0.134	0.026	0.00106469	Lung	N0
Bax	4.47724e-08	2.22739	0.388	0.186	0.0010937	Lung	N0
Hspd1	4.60902e-08	2.71964	0.313	0.123	0.00112589	Lung	N0
Cdkn1a	4.75114e-08	2.8499	0.373	0.173	0.00116061	Lung	N0
Blvra	4.90164e-08	3.22058	0.224	0.067	0.00119737	Lung	N0
Vat1	5.0603e-08	3.36567	0.134	0.026	0.00123613	Lung	N0
Klhdc4	5.21169e-08	3.33151	0.299	0.115	0.00127311	Lung	N0
Uqcrh	6.32353e-08	1.34062	0.761	0.774	0.00154471	Lung	N0
Mrpl38	6.38695e-08	3.39802	0.119	0.022	0.0015602	Lung	N0
Tmem14c	6.73404e-08	1.23394	0.627	0.482	0.00164499	Lung	N0
Odc1	7.04418e-08	1.97924	0.448	0.236	0.00172075	Lung	N0
Tmem135	7.10759e-08	3.25998	0.209	0.06	0.00173624	Lung	N0
Myc	7.26319e-08	3.16682	0.119	0.022	0.00177425	Lung	N0
Plaat3	7.54567e-08	2.84421	0.134	0.027	0.00184326	Lung	N0
Kdm6b	7.98116e-08	2.1836	0.418	0.219	0.00194964	Lung	N0
Ctsl	8.06387e-08	2.78234	0.299	0.114	0.00196984	Lung	N0
Maml2	8.34524e-08	3.34394	0.119	0.022	0.00203858	Lung	N0
Rps23	8.40797e-08	0.766353	0.94	0.972	0.0020539	Lung	N0
Pdlim5	9.97876e-08	2.29156	0.313	0.126	0.00243761	Lung	N0
Slc38a6	1.06801e-07	3.29874	0.164	0.04	0.00260894	Lung	N0
Gsto1	1.12814e-07	2.73891	0.209	0.061	0.00275581	Lung	N0
Rps15a	1.13904e-07	0.821676	0.985	0.995	0.00278244	Lung	N0
Atp2b4	1.15658e-07	2.88358	0.119	0.022	0.00282529	Lung	N0
Rassf1	1.215e-07	2.61252	0.239	0.078	0.002968	Lung	N0
Aopep	1.26666e-07	2.54337	0.254	0.088	0.00309421	Lung	N0
Sat1	1.29318e-07	1.91322	0.612	0.488	0.00315899	Lung	N0
Rpl34	1.31453e-07	0.835987	0.925	0.995	0.00321113	Lung	N0
Cecr2	1.31685e-07	2.22322	0.119	0.022	0.0032168	Lung	N0
Rps2	1.39674e-07	0.986139	0.881	0.89	0.00341196	Lung	N0
Nceh1	1.40228e-07	3.30683	0.299	0.12	0.00342548	Lung	N0
Rpl37	1.4024e-07	0.941279	0.925	0.988	0.00342578	Lung	N0
Clta	1.72648e-07	1.09294	0.776	0.839	0.00421743	Lung	N0
Icam2	1.92729e-07	3.24599	0.104	0.018	0.00470799	Lung	N0
Rhof	1.95858e-07	3.23669	0.104	0.018	0.00478442	Lung	N0
Ehd4	1.99375e-07	2.67465	0.224	0.071	0.00487033	Lung	N0
Pitpna	2.0106e-07	1.90027	0.507	0.345	0.00491149	Lung	N0
Cndp2	2.01337e-07	3.06988	0.194	0.055	0.00491827	Lung	N0
Ppan	2.03195e-07	3.06315	0.104	0.018	0.00496366	Lung	N0
Gm10076	2.04602e-07	1.69691	0.582	0.44	0.00499801	Lung	N0
Net1	2.06182e-07	2.414	0.284	0.11	0.00503661	Lung	N0
Ifi27l2a	2.27792e-07	3.88132	0.134	0.028	0.0055645	Lung	N0
Adk	2.30095e-07	2.07132	0.299	0.12	0.00562077	Lung	N0
Nrg4	2.30208e-07	3.62922	0.149	0.035	0.00562352	Lung	N0
Hspa4	2.36159e-07	1.66258	0.463	0.278	0.00576889	Lung	N0
Mbtd1	2.37995e-07	1.93493	0.343	0.156	0.00581373	Lung	N0
Btg2	2.51792e-07	2.06369	0.388	0.189	0.00615078	Lung	N0
Rpl4	2.53671e-07	1.43522	0.701	0.646	0.00619667	Lung	N0
Reep5	2.58632e-07	1.32265	0.746	0.78	0.00631787	Lung	N0
Pprc1	2.64731e-07	2.73451	0.104	0.018	0.00646684	Lung	N0
Nfkbiz	2.72258e-07	1.88231	0.343	0.146	0.00665071	Lung	N0
Hint1	2.88042e-07	1.07191	0.746	0.822	0.00703629	Lung	N0
Rps7	3.02766e-07	0.860745	0.925	0.96	0.00739597	Lung	N0
Tgfbr2	3.12667e-07	2.54256	0.239	0.081	0.00763782	Lung	N0
Kcnq1ot1	3.39895e-07	2.7713	0.194	0.057	0.00830295	Lung	N0
Fbl	3.47982e-07	2.27707	0.209	0.063	0.00850051	Lung	N0
Perp	3.74009e-07	3.38914	0.119	0.024	0.00913628	Lung	N0
Rps10	3.98048e-07	0.720166	0.97	0.995	0.00972351	Lung	N0
Eef1d	3.98995e-07	1.6239	0.493	0.313	0.00974665	Lung	N0
Ctsb	3.99845e-07	2.34472	0.433	0.256	0.00976741	Lung	N0
Rps19	4.05101e-07	0.807284	0.896	0.965	0.0098958	Lung	N0
Rpl11	4.11878e-07	0.872413	0.94	0.98	0.0100613	Lung	N0
Slc1a5	4.1226e-07	2.27873	0.239	0.082	0.0100707	Lung	N0
Cd164	4.17907e-07	2.18779	0.463	0.294	0.0102086	Lung	N0
Dapk1	4.38653e-07	2.42062	0.328	0.15	0.0107154	Lung	N0
Bola3	4.64617e-07	1.96352	0.284	0.109	0.0113497	Lung	N0
Pdia4	4.81771e-07	2.71225	0.164	0.043	0.0117687	Lung	N0
Rpl10-ps3	4.96725e-07	2.43049	0.373	0.192	0.012134	Lung	N0
Ncl	5.60461e-07	1.85092	0.567	0.428	0.0136909	Lung	N0
Atp5e	5.96047e-07	0.929622	0.866	0.928	0.0145602	Lung	N0
Lamp1	6.58868e-07	1.85762	0.567	0.474	0.0160948	Lung	N0
Llph	6.66033e-07	1.90357	0.388	0.206	0.0162698	Lung	N0
Cyb561a3	7.35446e-07	2.75853	0.269	0.106	0.0179655	Lung	N0
Rps18	7.69791e-07	0.902027	0.925	0.953	0.0188045	Lung	N0
Slc29a1	7.76021e-07	2.80918	0.164	0.043	0.0189566	Lung	N0
5031439G07Rik	8.34464e-07	2.68252	0.194	0.059	0.0203843	Lung	N0
Hycc1	8.68775e-07	2.25119	0.224	0.076	0.0212224	Lung	N0
Anxa2	8.90076e-07	2.15847	0.657	0.654	0.0217428	Lung	N0
Otud4	9.06793e-07	2.4416	0.269	0.107	0.0221511	Lung	N0
Vcp	9.50813e-07	1.67912	0.448	0.278	0.0232265	Lung	N0
Skil	1.00524e-06	2.70257	0.239	0.086	0.0245561	Lung	N0
Galk2	1.04221e-06	3.21399	0.119	0.025	0.0254592	Lung	N0
Galnt7	1.04247e-06	2.68026	0.209	0.068	0.0254655	Lung	N0
Cacul1	1.04802e-06	2.56392	0.254	0.097	0.0256011	Lung	N0
Tomm6	1.05454e-06	1.60652	0.627	0.576	0.0257604	Lung	N0
Gls	1.06558e-06	2.17744	0.433	0.256	0.0260301	Lung	N0
Sirpa	1.12481e-06	2.37367	0.493	0.363	0.027477	Lung	N0
Tnfaip2	1.18371e-06	3.12678	0.373	0.199	0.0289156	Lung	N0
Zc3h12a	1.22265e-06	3.31881	0.164	0.045	0.0298669	Lung	N0
Ehmt2	1.26661e-06	2.79886	0.209	0.069	0.0309408	Lung	N0
Ahctf1	1.28566e-06	2.01115	0.299	0.13	0.0314061	Lung	N0
Wdr89	1.28924e-06	2.0212	0.463	0.302	0.0314936	Lung	N0
Spp1	1.32992e-06	3.66689	0.269	0.108	0.0324873	Lung	N0
Adam17	1.33443e-06	2.26368	0.269	0.109	0.0325974	Lung	N0
Nav2	1.34104e-06	3.68453	0.194	0.06	0.032759	Lung	N0
Ptges3	1.34258e-06	1.29833	0.552	0.417	0.0327965	Lung	N0
Gramd3	1.37702e-06	2.76809	0.104	0.02	0.0336378	Lung	N0
Ddx18	1.4813e-06	2.50398	0.194	0.061	0.0361851	Lung	N0
Eif3a	1.52059e-06	1.42334	0.537	0.414	0.037145	Lung	N0
Ggh	1.54293e-06	2.43657	0.254	0.099	0.0376908	Lung	N0
Atp6v1f	1.71761e-06	1.3771	0.627	0.549	0.0419577	Lung	N0
mt-Nd1	2.0453e-06	1.57107	0.642	0.577	0.0499626	Lung	N0
Rbm3	1.78332e-109	0.562603	0.995	0.962	4.35629e-105	BoneMarrow	N0
Fosb	1.70388e-85	1.33771	0.409	0.09	4.16225e-81	BoneMarrow	N0
Jund	2.49485e-67	0.803661	0.754	0.373	6.09442e-63	BoneMarrow	N0
Klf2	2.38589e-66	1.31984	0.722	0.387	5.82825e-62	BoneMarrow	N0
Per2	3.46271e-39	1.31052	0.333	0.118	8.45871e-35	BoneMarrow	N0
Sntg1	1.00134e-33	1.70293	0.204	0.052	2.44607e-29	BoneMarrow	N0
Rpl9-ps6	2.90572e-31	0.932407	0.399	0.178	7.0981e-27	BoneMarrow	N0
Cirbp	2.62858e-30	1.02839	0.407	0.185	6.4211e-26	BoneMarrow	N0
Tsc22d3	4.38694e-27	1.03165	0.241	0.087	1.07164e-22	BoneMarrow	N0
AI467606	9.40237e-27	1.12658	0.303	0.124	2.29681e-22	BoneMarrow	N0
Nudcd3	1.42437e-24	0.70703	0.398	0.189	3.47945e-20	BoneMarrow	N0
Dapk1	1.89258e-23	1.005	0.195	0.066	4.62321e-19	BoneMarrow	N0
Smim5	6.01262e-22	1.35101	0.183	0.063	1.46876e-17	BoneMarrow	N0
Lars2	1.70114e-21	0.762126	0.561	0.333	4.15554e-17	BoneMarrow	N0
Ski	5.53251e-21	1.05646	0.209	0.081	1.35148e-16	BoneMarrow	N0
Fmnl2	2.18767e-20	0.961354	0.309	0.161	5.34403e-16	BoneMarrow	N0
Plxdc2	3.52668e-20	1.14125	0.157	0.052	8.61498e-16	BoneMarrow	N0
ENSMUSG00000121445	7.29843e-20	1.23398	0.163	0.055	1.78286e-15	BoneMarrow	N0
Dipk1a	1.07824e-19	1.01578	0.173	0.062	2.63393e-15	BoneMarrow	N0
Wdr89	1.11702e-19	0.645681	0.363	0.183	2.72866e-15	BoneMarrow	N0
Add3	1.8959e-19	0.828187	0.409	0.218	4.63131e-15	BoneMarrow	N0
Arfrp1	5.60544e-19	1.08823	0.176	0.064	1.3693e-14	BoneMarrow	N0
Gm8797	6.06863e-19	1.28207	0.157	0.054	1.48244e-14	BoneMarrow	N0
Tnfsf13b	1.68325e-18	0.9672	0.194	0.076	4.11184e-14	BoneMarrow	N0
Igf2r	2.05703e-18	0.985562	0.201	0.081	5.02491e-14	BoneMarrow	N0
Rabif	2.57963e-18	1.16123	0.17	0.063	6.30152e-14	BoneMarrow	N0
Mcl1	2.61015e-18	0.735715	0.576	0.373	6.37609e-14	BoneMarrow	N0
Nfic	5.16835e-18	0.930706	0.251	0.116	1.26252e-13	BoneMarrow	N0
S1pr4	7.32375e-18	1.04849	0.201	0.083	1.78904e-13	BoneMarrow	N0
Ezr	2.07519e-17	0.634322	0.575	0.344	5.06926e-13	BoneMarrow	N0
Tmco3	2.36577e-17	0.832722	0.26	0.121	5.77911e-13	BoneMarrow	N0
Baiap2	2.53768e-17	1.30123	0.134	0.044	6.19905e-13	BoneMarrow	N0
Igfbp4	2.54058e-17	0.753698	0.313	0.161	6.20613e-13	BoneMarrow	N0
Slco4a1	2.763e-17	0.919698	0.228	0.102	6.74946e-13	BoneMarrow	N0
4833420G17Rik	6.13317e-17	1.10097	0.14	0.048	1.49821e-12	BoneMarrow	N0
Tomm34	8.38304e-17	1.11148	0.167	0.065	2.04781e-12	BoneMarrow	N0
Gm48678	9.13519e-17	1.65347	0.103	0.027	2.23155e-12	BoneMarrow	N0
Serpine2	1.05513e-16	1.02318	0.18	0.073	2.57748e-12	BoneMarrow	N0
Got1	1.64209e-16	0.991886	0.147	0.053	4.0113e-12	BoneMarrow	N0
Prodh	1.70096e-16	1.69587	0.1	0.026	4.1551e-12	BoneMarrow	N0
Ier2	1.981e-16	0.638563	0.544	0.347	4.8392e-12	BoneMarrow	N0
Dram2	2.30114e-16	1.39932	0.116	0.036	5.62123e-12	BoneMarrow	N0
Cetn2	2.34606e-16	1.10948	0.165	0.065	5.73096e-12	BoneMarrow	N0
B4galnt1	2.40889e-16	0.84665	0.222	0.099	5.88444e-12	BoneMarrow	N0
Smim36	3.52737e-16	1.39756	0.117	0.036	8.61665e-12	BoneMarrow	N0
Zfp62	3.55386e-16	1.15916	0.146	0.054	8.68137e-12	BoneMarrow	N0
Dbr1	3.6517e-16	1.01739	0.162	0.063	8.92038e-12	BoneMarrow	N0
Trim11	5.05256e-16	0.953198	0.198	0.085	1.23424e-11	BoneMarrow	N0
Thoc3	5.36949e-16	1.15541	0.146	0.054	1.31166e-11	BoneMarrow	N0
Dgcr6	5.38268e-16	1.31545	0.121	0.039	1.31488e-11	BoneMarrow	N0
Gm30716	6.13596e-16	0.75995	0.304	0.155	1.49889e-11	BoneMarrow	N0
Mogat2	9.19269e-16	0.934333	0.198	0.086	2.24559e-11	BoneMarrow	N0
Srebf2	1.06222e-15	0.734299	0.218	0.1	2.59479e-11	BoneMarrow	N0
Gm47071	1.07135e-15	0.678906	0.331	0.178	2.6171e-11	BoneMarrow	N0
BC004004	1.3199e-15	0.928323	0.185	0.079	3.22426e-11	BoneMarrow	N0
Idi1	1.32783e-15	1.16261	0.131	0.046	3.24361e-11	BoneMarrow	N0
Smim6	1.50187e-15	1.15313	0.163	0.066	3.66876e-11	BoneMarrow	N0
Zfp281	1.50258e-15	1.13528	0.144	0.054	3.6705e-11	BoneMarrow	N0
Abt1	1.56235e-15	0.862577	0.242	0.116	3.81652e-11	BoneMarrow	N0
Gm6169	2.07754e-15	1.03468	0.161	0.064	5.07502e-11	BoneMarrow	N0
Sike1	2.25414e-15	1.03101	0.155	0.061	5.50642e-11	BoneMarrow	N0
Opa1	2.50863e-15	1.22347	0.123	0.041	6.12807e-11	BoneMarrow	N0
Arhgef3	3.01759e-15	0.784882	0.195	0.088	7.37136e-11	BoneMarrow	N0
Nt5dc1	3.41048e-15	0.863605	0.201	0.09	8.33112e-11	BoneMarrow	N0
Rbm48	4.09351e-15	1.25112	0.125	0.044	9.99962e-11	BoneMarrow	N0
Tspyl1	4.22577e-15	1.26072	0.126	0.044	1.03227e-10	BoneMarrow	N0
Slc50a1	4.30455e-15	1.19182	0.126	0.044	1.05151e-10	BoneMarrow	N0
Rrm2b	4.56485e-15	1.16192	0.115	0.038	1.1151e-10	BoneMarrow	N0
Mex3c	6.32484e-15	1.01084	0.161	0.066	1.54503e-10	BoneMarrow	N0
Med4	6.3962e-15	1.00123	0.172	0.073	1.56246e-10	BoneMarrow	N0
Stx16	7.23589e-15	0.987173	0.146	0.057	1.76758e-10	BoneMarrow	N0
Esco1	7.54572e-15	0.859824	0.18	0.078	1.84327e-10	BoneMarrow	N0
Rnf166	8.08181e-15	0.730621	0.256	0.125	1.97422e-10	BoneMarrow	N0
Lats1	8.16928e-15	1.00871	0.147	0.057	1.99559e-10	BoneMarrow	N0
Dhx8	8.31526e-15	1.19787	0.135	0.05	2.03125e-10	BoneMarrow	N0
Itih5	9.05023e-15	1.10437	0.13	0.047	2.21079e-10	BoneMarrow	N0
Mideas	1.12037e-14	0.817645	0.179	0.079	2.73683e-10	BoneMarrow	N0
Rnf6	1.51446e-14	0.908061	0.168	0.071	3.69951e-10	BoneMarrow	N0
Nfatc1	1.54696e-14	0.85358	0.161	0.067	3.77891e-10	BoneMarrow	N0
Gabpa	1.54786e-14	0.784048	0.195	0.087	3.78111e-10	BoneMarrow	N0
Slc44a2	1.67726e-14	1.18356	0.124	0.044	4.09722e-10	BoneMarrow	N0
Mon2	1.69499e-14	0.937954	0.174	0.075	4.14052e-10	BoneMarrow	N0
Kctd10	1.80196e-14	0.917524	0.176	0.076	4.40182e-10	BoneMarrow	N0
Map3k8	1.81948e-14	0.739635	0.21	0.099	4.44462e-10	BoneMarrow	N0
Adgre5	1.9289e-14	0.649318	0.375	0.206	4.71191e-10	BoneMarrow	N0
Frat2	2.26908e-14	0.793693	0.212	0.1	5.54291e-10	BoneMarrow	N0
Btbd1	2.45347e-14	0.724041	0.25	0.124	5.99333e-10	BoneMarrow	N0
Yju2	2.61489e-14	1.1213	0.133	0.05	6.38765e-10	BoneMarrow	N0
Sec22c	4.45996e-14	1.1649	0.127	0.047	1.08948e-09	BoneMarrow	N0
Dnajc30	4.46531e-14	1.1704	0.118	0.041	1.09079e-09	BoneMarrow	N0
Fbxl2	5.11111e-14	0.816158	0.235	0.114	1.24854e-09	BoneMarrow	N0
Zfp655	5.17533e-14	1.04174	0.149	0.06	1.26423e-09	BoneMarrow	N0
Mtpap	5.77663e-14	1.0552	0.14	0.055	1.41112e-09	BoneMarrow	N0
Bud23	5.86939e-14	1.08571	0.131	0.049	1.43377e-09	BoneMarrow	N0
Trim35	6.05884e-14	0.891867	0.147	0.06	1.48005e-09	BoneMarrow	N0
Prkd2	6.777e-14	0.877499	0.181	0.08	1.65549e-09	BoneMarrow	N0
Fbxl14	6.83395e-14	0.682861	0.291	0.151	1.6694e-09	BoneMarrow	N0
2510039O18Rik	7.15753e-14	0.851346	0.192	0.088	1.74844e-09	BoneMarrow	N0
Hmgcr	7.66412e-14	0.748034	0.23	0.114	1.87219e-09	BoneMarrow	N0
Tnfrsf26	8.31669e-14	1.03183	0.142	0.057	2.0316e-09	BoneMarrow	N0
Map7	8.41127e-14	0.870037	0.131	0.05	2.05471e-09	BoneMarrow	N0
Ldlr	8.43439e-14	0.829947	0.163	0.071	2.06035e-09	BoneMarrow	N0
Mast3	9.16624e-14	0.911759	0.177	0.079	2.23913e-09	BoneMarrow	N0
Utp23	9.63421e-14	1.06806	0.132	0.051	2.35345e-09	BoneMarrow	N0
Setd1b	9.63711e-14	0.812538	0.208	0.099	2.35415e-09	BoneMarrow	N0
Tent5a	9.92959e-14	0.733903	0.267	0.14	2.4256e-09	BoneMarrow	N0
Tecpr2	1.06112e-13	0.770668	0.196	0.092	2.59211e-09	BoneMarrow	N0
Alg5	1.09205e-13	1.11811	0.125	0.047	2.66767e-09	BoneMarrow	N0
Lats2	1.13113e-13	0.733644	0.251	0.127	2.76311e-09	BoneMarrow	N0
Utp18	1.30513e-13	0.946659	0.135	0.053	3.18818e-09	BoneMarrow	N0
1700017B05Rik	1.33193e-13	0.773537	0.198	0.093	3.25364e-09	BoneMarrow	N0
Tob1	1.33603e-13	0.567514	0.173	0.078	3.26366e-09	BoneMarrow	N0
Vgll4	1.35656e-13	0.908666	0.112	0.039	3.3138e-09	BoneMarrow	N0
Sh2b3	1.53445e-13	1.06796	0.122	0.045	3.74836e-09	BoneMarrow	N0
Cnbd2	1.59961e-13	1.19983	0.119	0.044	3.90753e-09	BoneMarrow	N0
Pex13	1.62352e-13	1.21694	0.112	0.039	3.96593e-09	BoneMarrow	N0
Prdm4	1.71052e-13	1.3136	0.104	0.035	4.17845e-09	BoneMarrow	N0
Capn7	1.72944e-13	1.00331	0.108	0.037	4.22468e-09	BoneMarrow	N0
9530077C05Rik	1.78899e-13	1.28488	0.101	0.033	4.37015e-09	BoneMarrow	N0
Khnyn	1.87593e-13	1.21639	0.105	0.035	4.58253e-09	BoneMarrow	N0
Dennd4b	2.08414e-13	1.27261	0.102	0.033	5.09113e-09	BoneMarrow	N0
Spata13	2.10997e-13	0.799729	0.24	0.124	5.15422e-09	BoneMarrow	N0
Zswim8	2.23678e-13	1.0333	0.138	0.056	5.464e-09	BoneMarrow	N0
Sik1	2.26738e-13	0.780457	0.141	0.057	5.53876e-09	BoneMarrow	N0
Vegfa	2.30893e-13	0.879175	0.17	0.076	5.64025e-09	BoneMarrow	N0
Mtmr1	2.48435e-13	1.01689	0.134	0.053	6.06877e-09	BoneMarrow	N0
Fam204a	2.58039e-13	0.795641	0.194	0.091	6.30339e-09	BoneMarrow	N0
Snhg7	2.73102e-13	0.915724	0.171	0.077	6.67133e-09	BoneMarrow	N0
Chmp1b	2.81805e-13	1.04517	0.135	0.054	6.88394e-09	BoneMarrow	N0
Napsa	3.43864e-13	0.688445	0.424	0.264	8.3999e-09	BoneMarrow	N0
Siah2	3.59474e-13	0.729466	0.154	0.066	8.78122e-09	BoneMarrow	N0
Abraxas2	3.87874e-13	0.817205	0.183	0.084	9.47499e-09	BoneMarrow	N0
E4f1	4.7054e-13	1.04755	0.104	0.036	1.14944e-08	BoneMarrow	N0
Kit	4.7543e-13	1.06861	0.117	0.044	1.16138e-08	BoneMarrow	N0
Pop4	5.01187e-13	0.983985	0.119	0.044	1.2243e-08	BoneMarrow	N0
Ormdl1	5.0599e-13	1.09078	0.123	0.047	1.23603e-08	BoneMarrow	N0
Tigd2	5.76573e-13	1.15058	0.111	0.04	1.40845e-08	BoneMarrow	N0
Jmjd6	6.08341e-13	0.864819	0.177	0.082	1.48605e-08	BoneMarrow	N0
Rbm18	6.09294e-13	0.894957	0.157	0.068	1.48838e-08	BoneMarrow	N0
Mfsd10	6.1417e-13	0.690948	0.237	0.122	1.5003e-08	BoneMarrow	N0
Heca	7.15129e-13	0.787436	0.189	0.09	1.74692e-08	BoneMarrow	N0
Septin1	7.44696e-13	0.626864	0.286	0.151	1.81914e-08	BoneMarrow	N0
Xpa	8.06275e-13	1.12485	0.113	0.041	1.96957e-08	BoneMarrow	N0
Gm1604a	8.39285e-13	0.887998	0.161	0.071	2.05021e-08	BoneMarrow	N0
Gmfb	8.81223e-13	0.71048	0.215	0.107	2.15265e-08	BoneMarrow	N0
Abcd3	9.24298e-13	1.10224	0.111	0.04	2.25788e-08	BoneMarrow	N0
Tmem123	1.11139e-12	0.836064	0.13	0.052	2.7149e-08	BoneMarrow	N0
Mbd1	1.23214e-12	0.784879	0.16	0.071	3.00987e-08	BoneMarrow	N0
Camk2g	1.23761e-12	0.883939	0.165	0.075	3.02323e-08	BoneMarrow	N0
Naxe	1.32949e-12	0.955161	0.13	0.052	3.24767e-08	BoneMarrow	N0
Tdp2	1.37593e-12	0.791758	0.185	0.088	3.36111e-08	BoneMarrow	N0
Osgin2	1.51448e-12	1.06374	0.122	0.048	3.69958e-08	BoneMarrow	N0
Sharpin	1.58473e-12	1.2344	0.101	0.035	3.87118e-08	BoneMarrow	N0
Ddrgk1	1.60141e-12	0.866567	0.154	0.068	3.91191e-08	BoneMarrow	N0
Tex10	1.65001e-12	0.819061	0.169	0.078	4.03065e-08	BoneMarrow	N0
Aldh3a2	1.71369e-12	0.916692	0.15	0.066	4.18619e-08	BoneMarrow	N0
Rnf138	1.81714e-12	0.847503	0.137	0.057	4.43891e-08	BoneMarrow	N0
Ctps2	1.91462e-12	1.01437	0.122	0.048	4.67704e-08	BoneMarrow	N0
Stambpl1	1.93953e-12	0.659233	0.198	0.097	4.73787e-08	BoneMarrow	N0
Trappc3	2.01192e-12	0.909819	0.153	0.067	4.91471e-08	BoneMarrow	N0
Avl9	2.02898e-12	0.760086	0.162	0.074	4.95639e-08	BoneMarrow	N0
Sec24c	2.04776e-12	1.12881	0.116	0.044	5.00227e-08	BoneMarrow	N0
Itga6	2.05616e-12	1.01099	0.107	0.039	5.02279e-08	BoneMarrow	N0
Prkacb	2.13873e-12	0.940511	0.136	0.057	5.22449e-08	BoneMarrow	N0
Serpinb10	2.71869e-12	0.958706	0.135	0.057	6.64122e-08	BoneMarrow	N0
Rasa1	2.74063e-12	0.82857	0.153	0.068	6.69481e-08	BoneMarrow	N0
Smim29	2.88551e-12	0.749346	0.198	0.096	7.04873e-08	BoneMarrow	N0
Pgap6	3.1134e-12	0.791609	0.174	0.081	7.60543e-08	BoneMarrow	N0
Vhl	3.18912e-12	0.982401	0.132	0.055	7.79038e-08	BoneMarrow	N0
Elk4	3.24586e-12	0.906356	0.13	0.054	7.92898e-08	BoneMarrow	N0
Krr1	3.36626e-12	0.760341	0.184	0.089	8.2231e-08	BoneMarrow	N0
Taf5l	3.5379e-12	1.05078	0.106	0.039	8.64238e-08	BoneMarrow	N0
Lsg1	3.5961e-12	0.802879	0.133	0.056	8.78456e-08	BoneMarrow	N0
Myg1	3.7337e-12	0.843355	0.149	0.066	9.12068e-08	BoneMarrow	N0
Tcp11l2	3.75252e-12	0.720078	0.232	0.123	9.16665e-08	BoneMarrow	N0
Cd81	3.99143e-12	0.557048	0.551	0.348	9.75026e-08	BoneMarrow	N0
Hmgcs1	4.07484e-12	1.03504	0.115	0.044	9.95402e-08	BoneMarrow	N0
Mif4gd	4.20401e-12	0.664928	0.148	0.066	1.02696e-07	BoneMarrow	N0
Cnpy3	4.29953e-12	0.882833	0.151	0.067	1.05029e-07	BoneMarrow	N0
Gigyf1	4.50413e-12	1.09814	0.103	0.037	1.10027e-07	BoneMarrow	N0
Mrps35	4.64855e-12	1.14173	0.108	0.04	1.13555e-07	BoneMarrow	N0
Phf2	5.01993e-12	0.785501	0.177	0.084	1.22627e-07	BoneMarrow	N0
Znfx1	5.18999e-12	0.928581	0.138	0.06	1.26781e-07	BoneMarrow	N0
Edem2	5.34862e-12	1.06232	0.11	0.042	1.30656e-07	BoneMarrow	N0
Vcam1	5.46167e-12	0.685297	0.162	0.076	1.33418e-07	BoneMarrow	N0
Tpst2	5.60559e-12	0.770154	0.183	0.088	1.36933e-07	BoneMarrow	N0
Desi1	6.24908e-12	0.638679	0.346	0.201	1.52653e-07	BoneMarrow	N0
Ing2	6.28784e-12	0.626779	0.322	0.183	1.53599e-07	BoneMarrow	N0
Sdhc	6.78241e-12	0.770064	0.143	0.063	1.65681e-07	BoneMarrow	N0
C5ar2	6.79617e-12	1.10737	0.102	0.037	1.66017e-07	BoneMarrow	N0
Sec31a	7.67456e-12	0.860547	0.132	0.056	1.87474e-07	BoneMarrow	N0
Mtor	7.98073e-12	1.01663	0.115	0.045	1.94953e-07	BoneMarrow	N0
Snip1	8.01503e-12	0.856584	0.162	0.075	1.95791e-07	BoneMarrow	N0
Trmt10c	8.07513e-12	0.937951	0.123	0.05	1.97259e-07	BoneMarrow	N0
Sptlc1	8.24971e-12	0.824953	0.162	0.075	2.01524e-07	BoneMarrow	N0
Gpd2	8.33843e-12	0.612102	0.263	0.144	2.03691e-07	BoneMarrow	N0
Eif2s3y	8.72131e-12	0.729584	0.21	0.108	2.13044e-07	BoneMarrow	N0
Bmpr1a	8.90621e-12	0.990483	0.138	0.061	2.17561e-07	BoneMarrow	N0
Zfp330	9.12477e-12	0.872406	0.126	0.052	2.229e-07	BoneMarrow	N0
Midn	9.53204e-12	0.8646	0.145	0.065	2.32849e-07	BoneMarrow	N0
Casc3	9.59921e-12	0.840449	0.153	0.07	2.34489e-07	BoneMarrow	N0
Rfxap	9.61418e-12	0.804384	0.182	0.089	2.34855e-07	BoneMarrow	N0
Mpnd	9.71564e-12	1.0064	0.125	0.052	2.37334e-07	BoneMarrow	N0
Fam3c	1.00831e-11	0.657631	0.216	0.11	2.4631e-07	BoneMarrow	N0
Golt1b	1.06562e-11	0.662897	0.222	0.114	2.60309e-07	BoneMarrow	N0
Tpm3-rs7	1.06652e-11	1.15924	0.106	0.04	2.6053e-07	BoneMarrow	N0
Strip1	1.10633e-11	0.891142	0.131	0.055	2.70254e-07	BoneMarrow	N0
Ccdc186	1.14989e-11	0.809437	0.179	0.087	2.80895e-07	BoneMarrow	N0
Lmnb2	1.20588e-11	0.869053	0.146	0.065	2.94573e-07	BoneMarrow	N0
Snrnp25	1.23611e-11	0.759265	0.147	0.066	3.01957e-07	BoneMarrow	N0
Ptpn9	1.23897e-11	0.833204	0.132	0.057	3.02655e-07	BoneMarrow	N0
Dennd11	1.26667e-11	0.838983	0.154	0.071	3.09423e-07	BoneMarrow	N0
Pank3	1.28199e-11	0.906125	0.111	0.044	3.13166e-07	BoneMarrow	N0
Tbc1d2	1.32523e-11	0.760636	0.261	0.146	3.23727e-07	BoneMarrow	N0
Cdk5r1	1.33885e-11	1.12795	0.1	0.037	3.27054e-07	BoneMarrow	N0
Amer2	1.35733e-11	1.03698	0.106	0.041	3.31568e-07	BoneMarrow	N0
Kbtbd2	1.43545e-11	0.83203	0.145	0.065	3.50651e-07	BoneMarrow	N0
Calu	1.46216e-11	0.689153	0.182	0.089	3.57177e-07	BoneMarrow	N0
Nedd1	1.47204e-11	0.973022	0.125	0.052	3.59591e-07	BoneMarrow	N0
Pde12	1.501e-11	0.884049	0.131	0.056	3.66663e-07	BoneMarrow	N0
Erlin1	1.53681e-11	0.908834	0.111	0.044	3.75411e-07	BoneMarrow	N0
Cbll1	1.53796e-11	0.698362	0.185	0.091	3.75693e-07	BoneMarrow	N0
Isy1	1.56789e-11	0.773735	0.138	0.06	3.83003e-07	BoneMarrow	N0
Ccm2	1.57476e-11	0.572322	0.249	0.133	3.84682e-07	BoneMarrow	N0
Napg	1.58301e-11	0.897994	0.13	0.055	3.86699e-07	BoneMarrow	N0
Polg	1.59684e-11	0.635118	0.241	0.125	3.90077e-07	BoneMarrow	N0
Zfp53	1.63213e-11	1.00866	0.127	0.054	3.98696e-07	BoneMarrow	N0
Fbxo38	1.66297e-11	0.816024	0.144	0.065	4.06231e-07	BoneMarrow	N0
Dpy19l4	1.68359e-11	0.894664	0.145	0.066	4.11267e-07	BoneMarrow	N0
Slc25a46	1.73311e-11	0.807772	0.12	0.049	4.23365e-07	BoneMarrow	N0
Itgav	1.82646e-11	0.77095	0.133	0.057	4.46168e-07	BoneMarrow	N0
Rab9	1.85633e-11	0.728305	0.182	0.089	4.53465e-07	BoneMarrow	N0
N4bp2	1.89472e-11	0.740571	0.165	0.078	4.62842e-07	BoneMarrow	N0
Zfp395	1.97267e-11	0.90129	0.136	0.06	4.81884e-07	BoneMarrow	N0
Dnm1l	2.11882e-11	0.783628	0.163	0.077	5.17586e-07	BoneMarrow	N0
Lzic	2.13267e-11	0.901635	0.136	0.06	5.20968e-07	BoneMarrow	N0
Brap	2.15308e-11	1.0308	0.11	0.043	5.25954e-07	BoneMarrow	N0
Nmd3	2.15569e-11	0.901783	0.125	0.052	5.26592e-07	BoneMarrow	N0
Sgpp1	2.27726e-11	0.684032	0.221	0.116	5.5629e-07	BoneMarrow	N0
Hycc2	2.38785e-11	0.908203	0.14	0.063	5.83304e-07	BoneMarrow	N0
Foxk1	2.65334e-11	1.0957	0.102	0.039	6.48157e-07	BoneMarrow	N0
Fam76a	2.71958e-11	0.680135	0.225	0.118	6.64339e-07	BoneMarrow	N0
Abhd2	2.75995e-11	0.744902	0.168	0.081	6.74202e-07	BoneMarrow	N0
Nsfl1c	2.76521e-11	0.873689	0.131	0.057	6.75485e-07	BoneMarrow	N0
Limk2	3.0164e-11	0.83656	0.158	0.074	7.36847e-07	BoneMarrow	N0
Gpd1l	3.02033e-11	0.810603	0.139	0.062	7.37806e-07	BoneMarrow	N0
Polr2m	3.11126e-11	0.664663	0.252	0.135	7.60019e-07	BoneMarrow	N0
Dhx16	3.21733e-11	0.94253	0.121	0.051	7.85929e-07	BoneMarrow	N0
Tent4a	3.22922e-11	1.00694	0.112	0.045	7.88834e-07	BoneMarrow	N0
Cdyl2	3.26126e-11	0.860726	0.149	0.069	7.9666e-07	BoneMarrow	N0
Dnajc14	3.34354e-11	0.840948	0.135	0.06	8.16761e-07	BoneMarrow	N0
Mfap1a	3.39436e-11	0.766448	0.186	0.092	8.29173e-07	BoneMarrow	N0
Zfp740	3.44886e-11	1.05475	0.1	0.038	8.42488e-07	BoneMarrow	N0
Trappc2	3.52074e-11	0.916099	0.131	0.057	8.60047e-07	BoneMarrow	N0
Cops5	3.65171e-11	0.657078	0.23	0.122	8.92039e-07	BoneMarrow	N0
Hipk3	3.95515e-11	0.593964	0.184	0.091	9.66163e-07	BoneMarrow	N0
Atn1	3.98981e-11	0.794751	0.143	0.065	9.74631e-07	BoneMarrow	N0
Neto2	4.10828e-11	0.826112	0.149	0.069	1.00357e-06	BoneMarrow	N0
Slc9a1	4.20277e-11	0.739459	0.181	0.09	1.02665e-06	BoneMarrow	N0
Cog3	4.37916e-11	1.12453	0.1	0.038	1.06974e-06	BoneMarrow	N0
Med7	4.44596e-11	0.734031	0.179	0.089	1.08606e-06	BoneMarrow	N0
Snx12	4.51847e-11	0.618003	0.145	0.066	1.10377e-06	BoneMarrow	N0
Cnot10	4.65815e-11	0.856493	0.139	0.063	1.13789e-06	BoneMarrow	N0
Itfg1	4.99093e-11	0.719442	0.172	0.084	1.21919e-06	BoneMarrow	N0
Eef1akmt1	5.01389e-11	0.993381	0.106	0.041	1.22479e-06	BoneMarrow	N0
Nkapd1	5.24717e-11	1.0898	0.1	0.038	1.28178e-06	BoneMarrow	N0
Ddhd2	5.74174e-11	0.786175	0.151	0.071	1.40259e-06	BoneMarrow	N0
Zdhhc20	5.77689e-11	0.683748	0.175	0.087	1.41118e-06	BoneMarrow	N0
Slfn3	5.86113e-11	1.037	0.111	0.045	1.43176e-06	BoneMarrow	N0
Zfp869	6.06599e-11	0.931339	0.117	0.049	1.4818e-06	BoneMarrow	N0
Smim27	6.07103e-11	0.88444	0.128	0.056	1.48303e-06	BoneMarrow	N0
Smad4	6.08909e-11	0.774268	0.152	0.071	1.48744e-06	BoneMarrow	N0
4930453N24Rik	6.12286e-11	0.74077	0.178	0.088	1.49569e-06	BoneMarrow	N0
Usp22	6.50752e-11	0.733445	0.161	0.078	1.58966e-06	BoneMarrow	N0
Lactb	6.55003e-11	0.958586	0.113	0.047	1.60004e-06	BoneMarrow	N0
Dhrs3	6.75086e-11	0.874225	0.117	0.049	1.6491e-06	BoneMarrow	N0
Abhd17c	6.85941e-11	0.654478	0.14	0.063	1.67562e-06	BoneMarrow	N0
Retreg1	6.95342e-11	0.568185	0.177	0.09	1.69858e-06	BoneMarrow	N0
Gfpt1	7.07477e-11	0.664568	0.166	0.081	1.72822e-06	BoneMarrow	N0
Snx9	7.35654e-11	0.800682	0.105	0.041	1.79706e-06	BoneMarrow	N0
Sel1l	7.55398e-11	0.711791	0.179	0.089	1.84529e-06	BoneMarrow	N0
Mbip	7.8724e-11	0.822586	0.135	0.061	1.92307e-06	BoneMarrow	N0
Tlnrd1	7.929e-11	0.69529	0.196	0.1	1.9369e-06	BoneMarrow	N0
Timm22	7.93956e-11	0.794797	0.147	0.068	1.93947e-06	BoneMarrow	N0
Zbtb38	8.09212e-11	0.966306	0.107	0.043	1.97674e-06	BoneMarrow	N0
Rab37	8.20658e-11	0.929367	0.127	0.056	2.0047e-06	BoneMarrow	N0
Rab10os	8.28991e-11	0.892915	0.126	0.055	2.02506e-06	BoneMarrow	N0
Frmd8	8.8453e-11	0.911623	0.122	0.052	2.16073e-06	BoneMarrow	N0
Zfp292	8.92855e-11	0.510948	0.208	0.108	2.18107e-06	BoneMarrow	N0
Mbp	9.24676e-11	0.635363	0.178	0.089	2.2588e-06	BoneMarrow	N0
Fbxo10	9.40002e-11	0.653725	0.22	0.117	2.29624e-06	BoneMarrow	N0
2300009A05Rik	9.45284e-11	0.900519	0.111	0.046	2.30914e-06	BoneMarrow	N0
Gipc1	9.67271e-11	0.797194	0.152	0.072	2.36285e-06	BoneMarrow	N0
Ube2z	9.69652e-11	0.708623	0.16	0.077	2.36867e-06	BoneMarrow	N0
Msmo1	9.96232e-11	0.993201	0.116	0.049	2.43359e-06	BoneMarrow	N0
Dnajb9	9.96282e-11	0.597426	0.224	0.12	2.43372e-06	BoneMarrow	N0
Tm9sf4	1.00337e-10	0.870091	0.127	0.056	2.45104e-06	BoneMarrow	N0
Septin5	1.00655e-10	0.839546	0.146	0.068	2.4588e-06	BoneMarrow	N0
Rbm27	1.02665e-10	0.606417	0.189	0.096	2.5079e-06	BoneMarrow	N0
Manea	1.04993e-10	1.00745	0.11	0.045	2.56478e-06	BoneMarrow	N0
Smim30	1.10636e-10	0.675621	0.142	0.066	2.70261e-06	BoneMarrow	N0
Zfp422	1.1704e-10	0.95653	0.112	0.047	2.85906e-06	BoneMarrow	N0
Ebag9	1.20572e-10	1.02086	0.105	0.042	2.94534e-06	BoneMarrow	N0
Gm20732	1.22079e-10	0.694007	0.142	0.066	2.98214e-06	BoneMarrow	N0
Zc3h14	1.2238e-10	0.701946	0.173	0.086	2.98949e-06	BoneMarrow	N0
D430020J02Rik	1.22495e-10	1.05634	0.101	0.04	2.9923e-06	BoneMarrow	N0
Sipa1l1	1.23233e-10	0.518997	0.247	0.139	3.01033e-06	BoneMarrow	N0
Osbpl2	1.25085e-10	0.745195	0.155	0.074	3.05557e-06	BoneMarrow	N0
Stard5	1.26754e-10	0.953258	0.109	0.044	3.09635e-06	BoneMarrow	N0
Siah1a	1.33534e-10	0.857362	0.125	0.055	3.26198e-06	BoneMarrow	N0
Cnr2	1.33812e-10	0.87412	0.123	0.054	3.26876e-06	BoneMarrow	N0
Btf3l4	1.34847e-10	0.958084	0.101	0.04	3.29404e-06	BoneMarrow	N0
Trim41	1.35871e-10	0.747715	0.148	0.07	3.31906e-06	BoneMarrow	N0
Iah1	1.37315e-10	0.811842	0.136	0.062	3.35432e-06	BoneMarrow	N0
Tpcn1	1.37432e-10	1.0385	0.101	0.04	3.35719e-06	BoneMarrow	N0
Lonrf1	1.38022e-10	0.856519	0.131	0.059	3.3716e-06	BoneMarrow	N0
Ing1	1.38211e-10	0.597918	0.238	0.128	3.37622e-06	BoneMarrow	N0
Tinagl1	1.43808e-10	0.80088	0.151	0.073	3.51295e-06	BoneMarrow	N0
Mcrs1	1.50823e-10	0.739801	0.162	0.079	3.68431e-06	BoneMarrow	N0
Rtkn2	1.52028e-10	0.929528	0.12	0.052	3.71375e-06	BoneMarrow	N0
Aunip	1.55195e-10	0.793543	0.153	0.074	3.7911e-06	BoneMarrow	N0
Atxn1l	1.63159e-10	1.00162	0.112	0.047	3.98566e-06	BoneMarrow	N0
Ntan1	1.64445e-10	0.664007	0.176	0.088	4.01705e-06	BoneMarrow	N0
Ift57	1.68396e-10	0.819404	0.132	0.06	4.11358e-06	BoneMarrow	N0
Top3b	1.76505e-10	0.834723	0.136	0.063	4.31166e-06	BoneMarrow	N0
Ap4s1	1.78573e-10	0.766029	0.131	0.059	4.36219e-06	BoneMarrow	N0
Atg9a	1.80604e-10	0.793422	0.148	0.071	4.4118e-06	BoneMarrow	N0
Adcy7	1.82816e-10	0.634456	0.167	0.083	4.46584e-06	BoneMarrow	N0
Sephs1	1.9067e-10	0.715595	0.164	0.08	4.65768e-06	BoneMarrow	N0
Fam110a	1.9163e-10	0.670562	0.211	0.112	4.68114e-06	BoneMarrow	N0
Taf1b	1.98523e-10	0.909885	0.11	0.046	4.84953e-06	BoneMarrow	N0
Vps72	1.98792e-10	0.767618	0.124	0.055	4.8561e-06	BoneMarrow	N0
Hhex	2.00108e-10	0.586506	0.31	0.179	4.88823e-06	BoneMarrow	N0
Jade1	2.04002e-10	0.675627	0.244	0.135	4.98337e-06	BoneMarrow	N0
Insig1	2.06021e-10	0.854193	0.122	0.054	5.03268e-06	BoneMarrow	N0
Iftap	2.06949e-10	0.721495	0.176	0.091	5.05535e-06	BoneMarrow	N0
Ccdc9	2.13641e-10	0.92125	0.114	0.049	5.21883e-06	BoneMarrow	N0
Plpp6	2.16147e-10	0.768328	0.125	0.055	5.28004e-06	BoneMarrow	N0
Tns3	2.19898e-10	0.711686	0.167	0.083	5.37166e-06	BoneMarrow	N0
Ccnc	2.21278e-10	0.743824	0.143	0.068	5.40538e-06	BoneMarrow	N0
Ppp2r3d	2.31377e-10	0.855553	0.106	0.044	5.65209e-06	BoneMarrow	N0
Gpr137c	2.37757e-10	0.730517	0.162	0.08	5.80792e-06	BoneMarrow	N0
Plec	2.527e-10	0.698707	0.158	0.078	6.17296e-06	BoneMarrow	N0
Slc35d2	2.54291e-10	0.708248	0.163	0.081	6.21182e-06	BoneMarrow	N0
Mdm1	2.57382e-10	0.806745	0.137	0.063	6.28732e-06	BoneMarrow	N0
Rab3gap1	2.67688e-10	0.638016	0.162	0.08	6.53908e-06	BoneMarrow	N0
Mnat1	2.72497e-10	0.897323	0.103	0.042	6.65656e-06	BoneMarrow	N0
Sec13	2.80951e-10	0.608024	0.235	0.127	6.86306e-06	BoneMarrow	N0
Pqbp1	2.83115e-10	0.698494	0.152	0.074	6.91593e-06	BoneMarrow	N0
Zfp592	3.03813e-10	0.702347	0.147	0.071	7.42153e-06	BoneMarrow	N0
Cdc37l1	3.21782e-10	0.70638	0.159	0.079	7.8605e-06	BoneMarrow	N0
Steep1	3.2304e-10	0.791966	0.134	0.062	7.89122e-06	BoneMarrow	N0
Ankrd9	3.26299e-10	0.851017	0.124	0.055	7.97083e-06	BoneMarrow	N0
Stimate	3.3075e-10	0.780378	0.124	0.055	8.07956e-06	BoneMarrow	N0
Gm14164	3.46239e-10	0.593149	0.155	0.076	8.45793e-06	BoneMarrow	N0
Ash2l	3.46433e-10	0.946376	0.109	0.046	8.46266e-06	BoneMarrow	N0
Cldn1	3.47366e-10	0.563388	0.22	0.122	8.48546e-06	BoneMarrow	N0
Pitpnb	3.50231e-10	0.639729	0.23	0.125	8.55544e-06	BoneMarrow	N0
Exosc4	3.58812e-10	0.829497	0.139	0.066	8.76507e-06	BoneMarrow	N0
Adh5	3.68183e-10	0.735805	0.162	0.08	8.99397e-06	BoneMarrow	N0
Clns1a	3.69433e-10	0.712599	0.147	0.071	9.02451e-06	BoneMarrow	N0
Arfgap1	3.77378e-10	0.860534	0.125	0.056	9.21859e-06	BoneMarrow	N0
Kansl3	3.83938e-10	0.956375	0.102	0.041	9.37883e-06	BoneMarrow	N0
Asah1	4.01261e-10	0.59002	0.145	0.069	9.80199e-06	BoneMarrow	N0
Cracr2a	4.03271e-10	0.710433	0.162	0.08	9.8511e-06	BoneMarrow	N0
Plrg1	4.07019e-10	0.94909	0.102	0.041	9.94265e-06	BoneMarrow	N0
Ldhb	4.09146e-10	0.694995	0.19	0.1	9.99461e-06	BoneMarrow	N0
Ncoa6	4.13989e-10	0.575134	0.2	0.106	1.01129e-05	BoneMarrow	N0
Gpr84	4.19782e-10	0.580866	0.241	0.132	1.02544e-05	BoneMarrow	N0
Rraga	4.34145e-10	0.717981	0.156	0.077	1.06053e-05	BoneMarrow	N0
Ralgapb	4.39343e-10	0.752434	0.138	0.065	1.07323e-05	BoneMarrow	N0
Rbmx2	4.43046e-10	0.670264	0.168	0.084	1.08227e-05	BoneMarrow	N0
Sbf1	4.47402e-10	0.909688	0.104	0.043	1.09291e-05	BoneMarrow	N0
Smim19	4.51698e-10	0.796123	0.121	0.054	1.10341e-05	BoneMarrow	N0
Akap11	4.56399e-10	0.661355	0.141	0.067	1.11489e-05	BoneMarrow	N0
Rbm34	4.66954e-10	0.940119	0.108	0.046	1.14068e-05	BoneMarrow	N0
Orc5	4.67483e-10	0.785129	0.132	0.062	1.14197e-05	BoneMarrow	N0
Hmbox1	4.9119e-10	0.686163	0.172	0.087	1.19988e-05	BoneMarrow	N0
Klf10	4.93364e-10	0.58995	0.235	0.132	1.20519e-05	BoneMarrow	N0
Inip	5.04178e-10	0.667554	0.174	0.088	1.23161e-05	BoneMarrow	N0
Polr3b	5.06833e-10	0.709153	0.171	0.087	1.23809e-05	BoneMarrow	N0
BC028528	5.27015e-10	0.827596	0.142	0.068	1.28739e-05	BoneMarrow	N0
Fnta	5.28702e-10	0.829926	0.139	0.066	1.29151e-05	BoneMarrow	N0
Stard4	5.3321e-10	0.774596	0.106	0.044	1.30253e-05	BoneMarrow	N0
Smg5	5.7634e-10	0.686187	0.139	0.066	1.40788e-05	BoneMarrow	N0
Il1rap	5.96464e-10	0.560071	0.267	0.158	1.45704e-05	BoneMarrow	N0
Rbm22	6.06955e-10	0.561958	0.202	0.108	1.48267e-05	BoneMarrow	N0
Cops8	6.28156e-10	0.591963	0.287	0.164	1.53446e-05	BoneMarrow	N0
Commd5	6.44456e-10	0.909865	0.105	0.044	1.57428e-05	BoneMarrow	N0
Spata2	6.45228e-10	0.913111	0.111	0.048	1.57616e-05	BoneMarrow	N0
Srd5a3	6.46532e-10	0.709803	0.133	0.062	1.57935e-05	BoneMarrow	N0
Nsmce3	6.50935e-10	0.606727	0.234	0.129	1.5901e-05	BoneMarrow	N0
Zfp212	6.63575e-10	0.960931	0.103	0.043	1.62098e-05	BoneMarrow	N0
Acd	6.73658e-10	0.962594	0.104	0.044	1.64561e-05	BoneMarrow	N0
Hdac2	6.89012e-10	0.63288	0.176	0.09	1.68312e-05	BoneMarrow	N0
Smim15	7.02502e-10	0.753193	0.157	0.078	1.71607e-05	BoneMarrow	N0
Nat9	7.0451e-10	0.849225	0.114	0.05	1.72098e-05	BoneMarrow	N0
Mapkapk5	7.0754e-10	0.791923	0.115	0.05	1.72838e-05	BoneMarrow	N0
Rnf113a2	7.13884e-10	0.837463	0.142	0.068	1.74388e-05	BoneMarrow	N0
Mrpl44	7.80909e-10	0.738439	0.173	0.089	1.9076e-05	BoneMarrow	N0
Tmem43	7.81885e-10	0.762627	0.146	0.071	1.90999e-05	BoneMarrow	N0
Igbp1	7.83319e-10	0.866208	0.112	0.049	1.91349e-05	BoneMarrow	N0
Msrb2	8.32989e-10	0.778323	0.133	0.063	2.03483e-05	BoneMarrow	N0
Dnajc21	8.35454e-10	0.588318	0.229	0.127	2.04085e-05	BoneMarrow	N0
Znrf2	8.41593e-10	0.570002	0.152	0.075	2.05584e-05	BoneMarrow	N0
Phka2	8.62985e-10	0.835459	0.103	0.043	2.1081e-05	BoneMarrow	N0
Tmem183a	8.88099e-10	0.668643	0.143	0.069	2.16945e-05	BoneMarrow	N0
1110038F14Rik	8.90522e-10	0.76862	0.136	0.065	2.17537e-05	BoneMarrow	N0
Selenoo	9.7111e-10	0.758091	0.119	0.054	2.37223e-05	BoneMarrow	N0
Tgoln1	9.75386e-10	0.70465	0.157	0.079	2.38267e-05	BoneMarrow	N0
Mfsd14a	9.76093e-10	0.735165	0.156	0.079	2.3844e-05	BoneMarrow	N0
Cep78	9.76722e-10	0.917357	0.119	0.054	2.38594e-05	BoneMarrow	N0
Axin1	9.78343e-10	0.724188	0.132	0.062	2.3899e-05	BoneMarrow	N0
Nipsnap2	9.81299e-10	0.835444	0.127	0.059	2.39712e-05	BoneMarrow	N0
Coa8	9.81732e-10	0.758398	0.123	0.056	2.39817e-05	BoneMarrow	N0
Mysm1	9.82466e-10	0.707943	0.161	0.082	2.39997e-05	BoneMarrow	N0
Nelfa	9.95657e-10	0.841045	0.124	0.057	2.43219e-05	BoneMarrow	N0
Usp5	9.98995e-10	0.633672	0.214	0.116	2.44034e-05	BoneMarrow	N0
Gna12	1.02419e-09	0.80364	0.116	0.052	2.50189e-05	BoneMarrow	N0
Zfp830	1.02999e-09	0.708009	0.173	0.089	2.51606e-05	BoneMarrow	N0
Mms19	1.03181e-09	0.790681	0.136	0.065	2.5205e-05	BoneMarrow	N0
Setdb2	1.05277e-09	0.849086	0.11	0.048	2.57172e-05	BoneMarrow	N0
Dnajc15	1.06358e-09	0.549641	0.175	0.09	2.59812e-05	BoneMarrow	N0
Birc2	1.08446e-09	0.800415	0.13	0.061	2.64911e-05	BoneMarrow	N0
Dicer1	1.10789e-09	0.766103	0.131	0.061	2.70635e-05	BoneMarrow	N0
Plau	1.15e-09	0.898762	0.11	0.048	2.80921e-05	BoneMarrow	N0
Chchd7	1.1549e-09	0.956885	0.108	0.047	2.82118e-05	BoneMarrow	N0
Zfp518a	1.17071e-09	0.759285	0.135	0.065	2.8598e-05	BoneMarrow	N0
Tm2d2	1.18639e-09	0.696186	0.15	0.074	2.89812e-05	BoneMarrow	N0
Gm19951	1.18869e-09	0.710127	0.134	0.064	2.90372e-05	BoneMarrow	N0
Pigu	1.22527e-09	0.684131	0.136	0.065	2.99308e-05	BoneMarrow	N0
Patz1	1.2867e-09	0.746496	0.135	0.064	3.14314e-05	BoneMarrow	N0
Ifngr2	1.33877e-09	0.75481	0.157	0.08	3.27036e-05	BoneMarrow	N0
A630001G21Rik	1.36263e-09	0.605641	0.162	0.082	3.32862e-05	BoneMarrow	N0
Ahcyl1	1.375e-09	0.757748	0.138	0.067	3.35886e-05	BoneMarrow	N0
Hdac3	1.37635e-09	0.766288	0.127	0.059	3.36214e-05	BoneMarrow	N0
Lin7c	1.41475e-09	0.589025	0.223	0.123	3.45596e-05	BoneMarrow	N0
Ttll5	1.42845e-09	0.785251	0.11	0.049	3.48941e-05	BoneMarrow	N0
Reck	1.42987e-09	0.595366	0.226	0.126	3.4929e-05	BoneMarrow	N0
Rgs14	1.4753e-09	0.67151	0.149	0.074	3.60386e-05	BoneMarrow	N0
Ginm1	1.48701e-09	0.687592	0.163	0.084	3.63247e-05	BoneMarrow	N0
Smarcad1	1.48913e-09	0.64718	0.148	0.074	3.63765e-05	BoneMarrow	N0
Stx4a	1.48958e-09	0.66352	0.119	0.054	3.63875e-05	BoneMarrow	N0
Coa4	1.51021e-09	0.867501	0.12	0.055	3.68913e-05	BoneMarrow	N0
Fbxl3	1.51163e-09	0.51068	0.183	0.098	3.69262e-05	BoneMarrow	N0
Ino80dos	1.53902e-09	0.934025	0.108	0.047	3.75953e-05	BoneMarrow	N0
Sclt1	1.5453e-09	0.686381	0.163	0.084	3.77485e-05	BoneMarrow	N0
Ykt6	1.56442e-09	0.613075	0.185	0.098	3.82156e-05	BoneMarrow	N0
Faap20	1.64577e-09	0.709536	0.151	0.075	4.02029e-05	BoneMarrow	N0
Rprd2	1.65276e-09	0.563046	0.207	0.112	4.03736e-05	BoneMarrow	N0
Amdhd2	1.67487e-09	0.663153	0.106	0.046	4.09138e-05	BoneMarrow	N0
Taf13	1.67516e-09	0.841053	0.111	0.049	4.09209e-05	BoneMarrow	N0
Arhgef39	1.70405e-09	0.834433	0.114	0.051	4.16265e-05	BoneMarrow	N0
Fmo5	1.70743e-09	0.544175	0.248	0.142	4.17092e-05	BoneMarrow	N0
Cfap20	1.74203e-09	0.556151	0.189	0.1	4.25542e-05	BoneMarrow	N0
Hexb	1.77602e-09	0.562628	0.521	0.334	4.33845e-05	BoneMarrow	N0
Krt83	1.82353e-09	0.572589	0.157	0.08	4.45452e-05	BoneMarrow	N0
Vezf1	1.89373e-09	0.560246	0.213	0.117	4.62601e-05	BoneMarrow	N0
Kat5	1.90022e-09	0.823911	0.11	0.049	4.64185e-05	BoneMarrow	N0
Cand1	1.98487e-09	0.720819	0.128	0.06	4.84864e-05	BoneMarrow	N0
Map3k4	2.01678e-09	0.89217	0.109	0.048	4.92658e-05	BoneMarrow	N0
Cox16	2.03175e-09	0.526034	0.239	0.133	4.96315e-05	BoneMarrow	N0
Tshz1	2.03484e-09	0.690294	0.124	0.057	4.97071e-05	BoneMarrow	N0
Ythdf2	2.09462e-09	0.632793	0.193	0.103	5.11674e-05	BoneMarrow	N0
Ints8	2.11176e-09	0.75304	0.129	0.062	5.15861e-05	BoneMarrow	N0
Gnpat	2.15176e-09	0.771767	0.121	0.056	5.25631e-05	BoneMarrow	N0
Id1	2.15232e-09	0.522167	0.602	0.43	5.2577e-05	BoneMarrow	N0
Pex2	2.2051e-09	0.623158	0.18	0.095	5.38661e-05	BoneMarrow	N0
Sucla2	2.21151e-09	0.689864	0.15	0.075	5.40227e-05	BoneMarrow	N0
Socs4	2.24329e-09	0.656811	0.167	0.087	5.4799e-05	BoneMarrow	N0
Paip1	2.24863e-09	0.839885	0.112	0.05	5.49295e-05	BoneMarrow	N0
Fam91a1	2.27262e-09	0.689927	0.125	0.059	5.55156e-05	BoneMarrow	N0
Sh3gl1	2.27629e-09	0.598062	0.189	0.1	5.56052e-05	BoneMarrow	N0
Asb8	2.34328e-09	0.820631	0.111	0.049	5.72416e-05	BoneMarrow	N0
Arl11	2.35752e-09	0.675067	0.16	0.082	5.75896e-05	BoneMarrow	N0
Hsdl1	2.40286e-09	0.786035	0.132	0.063	5.86971e-05	BoneMarrow	N0
Auh	2.46466e-09	0.765766	0.13	0.062	6.02066e-05	BoneMarrow	N0
Rmi1	2.48972e-09	0.866888	0.114	0.052	6.08188e-05	BoneMarrow	N0
Ccdc47	2.4948e-09	0.696882	0.155	0.079	6.0943e-05	BoneMarrow	N0
Mthfsl	2.52596e-09	0.683272	0.153	0.077	6.17042e-05	BoneMarrow	N0
Slc31a2	2.53687e-09	0.584241	0.333	0.199	6.19706e-05	BoneMarrow	N0
Tatdn2	2.55449e-09	0.68924	0.136	0.066	6.24011e-05	BoneMarrow	N0
Kif21b	2.66415e-09	0.6472	0.189	0.102	6.50798e-05	BoneMarrow	N0
Uxs1	2.6884e-09	0.743851	0.132	0.063	6.56723e-05	BoneMarrow	N0
Ythdf1	2.74004e-09	0.577467	0.234	0.132	6.69336e-05	BoneMarrow	N0
Smad2	2.7767e-09	0.597712	0.208	0.114	6.78291e-05	BoneMarrow	N0
Paxx	2.85333e-09	0.772518	0.127	0.06	6.97011e-05	BoneMarrow	N0
Ctnnbl1	2.86292e-09	0.608419	0.173	0.09	6.99353e-05	BoneMarrow	N0
Rnf126	2.91591e-09	0.791156	0.117	0.054	7.12298e-05	BoneMarrow	N0
Rae1	2.94447e-09	0.65026	0.168	0.088	7.19275e-05	BoneMarrow	N0
Hsdl2	3.05918e-09	0.866058	0.11	0.049	7.47297e-05	BoneMarrow	N0
Upf3a	3.06197e-09	0.685179	0.152	0.077	7.47979e-05	BoneMarrow	N0
Mmp8	3.06491e-09	1.23084	0.103	0.049	7.48696e-05	BoneMarrow	N0
Prdm2	3.1133e-09	0.6346	0.167	0.088	7.60517e-05	BoneMarrow	N0
Chmp2b	3.14005e-09	0.854019	0.113	0.052	7.67052e-05	BoneMarrow	N0
Hsd17b8	3.17845e-09	0.715945	0.139	0.068	7.76432e-05	BoneMarrow	N0
Anapc10	3.22712e-09	0.699849	0.124	0.058	7.8832e-05	BoneMarrow	N0
Tmem167b	3.29075e-09	0.905713	0.102	0.044	8.03865e-05	BoneMarrow	N0
Ccdc97	3.34201e-09	0.856691	0.105	0.046	8.16386e-05	BoneMarrow	N0
Armc7	3.34586e-09	0.644954	0.183	0.098	8.17327e-05	BoneMarrow	N0
Ddx20	3.41303e-09	0.827895	0.113	0.052	8.33735e-05	BoneMarrow	N0
Crkl	3.45364e-09	0.663486	0.153	0.078	8.43656e-05	BoneMarrow	N0
Tmem248	3.4826e-09	0.578764	0.243	0.138	8.50728e-05	BoneMarrow	N0
Sec22b	3.49421e-09	0.550538	0.277	0.16	8.53566e-05	BoneMarrow	N0
Cyth2	3.5263e-09	0.667013	0.166	0.086	8.61405e-05	BoneMarrow	N0
Polr1f	3.57334e-09	0.565568	0.198	0.107	8.72895e-05	BoneMarrow	N0
Gxylt1	3.63565e-09	0.75005	0.139	0.068	8.88117e-05	BoneMarrow	N0
Gosr2	3.6678e-09	0.591151	0.164	0.084	8.95971e-05	BoneMarrow	N0
Ddx47	3.69844e-09	0.729857	0.141	0.07	9.03455e-05	BoneMarrow	N0
Mphosph6	3.7231e-09	0.651661	0.17	0.089	9.09479e-05	BoneMarrow	N0
Ebna1bp2	3.73296e-09	0.50013	0.324	0.191	9.11888e-05	BoneMarrow	N0
Stxbp3	3.85788e-09	0.748096	0.117	0.055	9.42402e-05	BoneMarrow	N0
Efr3a	3.87494e-09	0.649811	0.148	0.075	9.46571e-05	BoneMarrow	N0
Arhgef18	3.92783e-09	0.579739	0.266	0.156	9.5949e-05	BoneMarrow	N0
Lpcat4	4.06603e-09	0.561101	0.214	0.118	9.9325e-05	BoneMarrow	N0
Ikzf5	4.24489e-09	0.630244	0.151	0.076	0.000103694	BoneMarrow	N0
Coq10b	4.35987e-09	0.638333	0.113	0.052	0.000106503	BoneMarrow	N0
Fanca	4.43484e-09	0.653217	0.141	0.07	0.000108334	BoneMarrow	N0
Psmg1	4.44426e-09	0.830882	0.111	0.051	0.000108564	BoneMarrow	N0
Pphln1	4.46735e-09	0.583496	0.157	0.081	0.000109128	BoneMarrow	N0
Spg21	4.50297e-09	0.548023	0.313	0.183	0.000109998	BoneMarrow	N0
Psd4	4.50409e-09	0.645741	0.152	0.077	0.000110026	BoneMarrow	N0
Fam117b	4.56268e-09	0.591008	0.166	0.087	0.000111457	BoneMarrow	N0
Metap1	4.63393e-09	0.818038	0.108	0.049	0.000113198	BoneMarrow	N0
Leng8	4.67137e-09	0.716233	0.132	0.065	0.000114112	BoneMarrow	N0
Bpnt2	4.75403e-09	0.625947	0.157	0.081	0.000116131	BoneMarrow	N0
Glod4	4.85776e-09	0.585844	0.195	0.106	0.000118665	BoneMarrow	N0
Mia3	4.89459e-09	0.619461	0.171	0.09	0.000119565	BoneMarrow	N0
Rufy1	4.97057e-09	0.613668	0.168	0.088	0.000121421	BoneMarrow	N0
Thap1	5.08787e-09	0.886477	0.101	0.044	0.000124286	BoneMarrow	N0
Ormdl2	5.0949e-09	0.621683	0.176	0.093	0.000124458	BoneMarrow	N0
Immp1l	5.3089e-09	0.653944	0.158	0.082	0.000129686	BoneMarrow	N0
Dgcr8	5.31317e-09	0.637598	0.172	0.091	0.00012979	BoneMarrow	N0
Phrf1	5.33179e-09	0.664291	0.15	0.076	0.000130245	BoneMarrow	N0
Krit1	5.34464e-09	0.544975	0.222	0.126	0.000130559	BoneMarrow	N0
Gpatch11	5.68343e-09	0.728755	0.119	0.056	0.000138835	BoneMarrow	N0
Akna	5.81315e-09	0.62581	0.178	0.095	0.000142004	BoneMarrow	N0
Rbm43	6.07473e-09	0.783031	0.12	0.057	0.000148393	BoneMarrow	N0
Ccdc71l	6.11707e-09	0.668862	0.14	0.071	0.000149428	BoneMarrow	N0
Mfn2	6.12811e-09	0.699804	0.139	0.069	0.000149697	BoneMarrow	N0
Kbtbd7	6.13285e-09	0.712872	0.149	0.076	0.000149813	BoneMarrow	N0
Rnf5	6.36339e-09	0.598091	0.182	0.098	0.000155445	BoneMarrow	N0
Ccno	6.45521e-09	0.586027	0.174	0.092	0.000157688	BoneMarrow	N0
Rsbn1	6.58968e-09	0.558619	0.194	0.106	0.000160973	BoneMarrow	N0
Lonp1	6.74482e-09	0.765461	0.116	0.054	0.000164762	BoneMarrow	N0
Mfap1b	6.81331e-09	0.716976	0.132	0.065	0.000166436	BoneMarrow	N0
Nup107	6.88582e-09	0.585006	0.19	0.103	0.000168207	BoneMarrow	N0
Vamp3	6.88745e-09	0.598097	0.215	0.121	0.000168247	BoneMarrow	N0
Ubl3	6.8971e-09	0.534543	0.247	0.145	0.000168482	BoneMarrow	N0
Ppme1	6.90976e-09	0.882642	0.105	0.047	0.000168792	BoneMarrow	N0
Ric8a	6.92212e-09	0.858445	0.103	0.046	0.000169094	BoneMarrow	N0
Ulk2	6.92296e-09	0.676722	0.122	0.059	0.000169114	BoneMarrow	N0
Foxj3	7.09318e-09	0.821818	0.102	0.045	0.000173272	BoneMarrow	N0
Sdhaf2	7.13037e-09	0.683611	0.14	0.07	0.000174181	BoneMarrow	N0
Snx4	7.18021e-09	0.60793	0.194	0.107	0.000175398	BoneMarrow	N0
Smarcd1	7.2345e-09	0.907215	0.105	0.048	0.000176724	BoneMarrow	N0
Stat6	7.27546e-09	0.803582	0.112	0.052	0.000177725	BoneMarrow	N0
Rela	7.40026e-09	0.701051	0.13	0.063	0.000180774	BoneMarrow	N0
Haus2	7.43609e-09	0.715963	0.132	0.066	0.000181649	BoneMarrow	N0
Herpud2	7.74936e-09	0.649672	0.164	0.087	0.000189301	BoneMarrow	N0
B3gat3	7.7769e-09	0.79946	0.115	0.054	0.000189974	BoneMarrow	N0
Thoc6	7.78023e-09	0.634881	0.159	0.083	0.000190055	BoneMarrow	N0
Mpdu1	8.14932e-09	0.683078	0.138	0.069	0.000199071	BoneMarrow	N0
Gm19705	8.15114e-09	0.705387	0.151	0.078	0.000199116	BoneMarrow	N0
N4bp2l1	8.24638e-09	0.723301	0.141	0.071	0.000201443	BoneMarrow	N0
Gosr1	8.27887e-09	0.637279	0.152	0.078	0.000202236	BoneMarrow	N0
Fbxo28	8.31048e-09	0.684726	0.16	0.084	0.000203008	BoneMarrow	N0
Tagap	8.43848e-09	0.740555	0.139	0.07	0.000206135	BoneMarrow	N0
Sowahc	8.71826e-09	0.666273	0.105	0.047	0.00021297	BoneMarrow	N0
Prpf39	8.82115e-09	0.619731	0.144	0.074	0.000215483	BoneMarrow	N0
Slc25a36	9.27961e-09	0.667218	0.13	0.064	0.000226682	BoneMarrow	N0
Zbtb44	9.41791e-09	0.697904	0.113	0.053	0.000230061	BoneMarrow	N0
Pmpca	9.49373e-09	0.685759	0.148	0.076	0.000231913	BoneMarrow	N0
Lemd3	9.50654e-09	0.541993	0.161	0.084	0.000232226	BoneMarrow	N0
Arap2	9.63199e-09	0.755993	0.1	0.044	0.00023529	BoneMarrow	N0
Vcpip1	9.86178e-09	0.578604	0.161	0.085	0.000240904	BoneMarrow	N0
Ankrd46	9.88791e-09	0.772539	0.108	0.049	0.000241542	BoneMarrow	N0
Pmm1	1.00397e-08	0.701903	0.145	0.075	0.000245249	BoneMarrow	N0
Syngr1	1.02036e-08	0.605403	0.177	0.096	0.000249253	BoneMarrow	N0
Vamp4	1.03264e-08	0.69087	0.11	0.051	0.000252253	BoneMarrow	N0
Lmbrd1	1.06991e-08	0.654855	0.103	0.047	0.000261357	BoneMarrow	N0
Nt5c	1.07274e-08	0.583532	0.207	0.116	0.000262048	BoneMarrow	N0
Mob3a	1.08087e-08	0.803887	0.117	0.056	0.000264036	BoneMarrow	N0
Cep250	1.08195e-08	0.657637	0.135	0.067	0.000264298	BoneMarrow	N0
Sec14l1	1.11242e-08	0.742455	0.137	0.069	0.000271741	BoneMarrow	N0
Maip1	1.12228e-08	0.80261	0.114	0.054	0.000274151	BoneMarrow	N0
Mea1	1.149e-08	0.686115	0.114	0.054	0.000280678	BoneMarrow	N0
Cox5b-ps	1.16379e-08	0.585838	0.184	0.1	0.00028429	BoneMarrow	N0
Lrig2	1.16906e-08	0.800764	0.111	0.052	0.000285577	BoneMarrow	N0
Smad7	1.17686e-08	0.60182	0.105	0.048	0.000287482	BoneMarrow	N0
Ncoa5	1.19944e-08	0.830749	0.103	0.047	0.000293	BoneMarrow	N0
Rsrc1	1.23974e-08	0.516411	0.238	0.139	0.000302843	BoneMarrow	N0
Tmem126a	1.2487e-08	0.549521	0.141	0.072	0.000305031	BoneMarrow	N0
Rassf5	1.26617e-08	0.559477	0.264	0.157	0.0003093	BoneMarrow	N0
Washc3	1.29408e-08	0.69721	0.135	0.068	0.000316119	BoneMarrow	N0
2310009B15Rik	1.30021e-08	0.726815	0.143	0.073	0.000317615	BoneMarrow	N0
Cnep1r1	1.31826e-08	0.730683	0.119	0.057	0.000322024	BoneMarrow	N0
Clasrp	1.3372e-08	0.863754	0.108	0.05	0.000326651	BoneMarrow	N0
Erg28	1.3393e-08	0.60358	0.173	0.093	0.000327163	BoneMarrow	N0
Amn1	1.3966e-08	0.862322	0.105	0.049	0.000341162	BoneMarrow	N0
Rcbtb2	1.41119e-08	0.659167	0.152	0.079	0.000344725	BoneMarrow	N0
Adrb2	1.42139e-08	0.710563	0.155	0.084	0.000347216	BoneMarrow	N0
Trip11	1.43101e-08	0.532828	0.182	0.1	0.000349566	BoneMarrow	N0
Mcm9	1.45252e-08	0.641585	0.155	0.081	0.000354823	BoneMarrow	N0
Cpsf4	1.45269e-08	0.793345	0.1	0.045	0.000354864	BoneMarrow	N0
Ciapin1	1.463e-08	0.679709	0.14	0.071	0.000357382	BoneMarrow	N0
Tbc1d15	1.47919e-08	0.549413	0.2	0.114	0.000361336	BoneMarrow	N0
Gskip	1.48018e-08	0.731727	0.115	0.055	0.000361578	BoneMarrow	N0
Golga5	1.52562e-08	0.668033	0.128	0.063	0.000372679	BoneMarrow	N0
Nxt2	1.54658e-08	0.821119	0.104	0.047	0.0003778	BoneMarrow	N0
Tdg	1.58355e-08	0.644602	0.129	0.064	0.000386829	BoneMarrow	N0
Mcur1	1.61673e-08	0.751452	0.1	0.045	0.000394935	BoneMarrow	N0
Scrib	1.61973e-08	0.618038	0.145	0.074	0.000395667	BoneMarrow	N0
Grsf1	1.62687e-08	0.720045	0.124	0.06	0.000397411	BoneMarrow	N0
Azi2	1.63201e-08	0.596685	0.175	0.095	0.000398667	BoneMarrow	N0
Vps51	1.64506e-08	0.759204	0.123	0.06	0.000401855	BoneMarrow	N0
Urm1	1.64987e-08	0.81483	0.1	0.045	0.000403031	BoneMarrow	N0
Tmc6	1.65839e-08	0.597977	0.218	0.124	0.000405112	BoneMarrow	N0
Rmnd5b	1.66347e-08	0.637191	0.163	0.087	0.000406352	BoneMarrow	N0
Rpf1	1.68069e-08	0.635115	0.141	0.072	0.000410559	BoneMarrow	N0
Egln2	1.68244e-08	0.72322	0.115	0.055	0.000410986	BoneMarrow	N0
Casz1	1.69638e-08	0.618025	0.18	0.099	0.000414393	BoneMarrow	N0
Mynn	1.70122e-08	0.909491	0.1	0.045	0.000415574	BoneMarrow	N0
Tubgcp3	1.70603e-08	0.53795	0.179	0.098	0.000416749	BoneMarrow	N0
Kif1b	1.72948e-08	0.641603	0.154	0.082	0.000422477	BoneMarrow	N0
Ubxn6	1.75159e-08	0.669767	0.145	0.075	0.000427877	BoneMarrow	N0
Sp4	1.81209e-08	0.635777	0.17	0.093	0.000442658	BoneMarrow	N0
Lrrc59	1.8753e-08	0.542226	0.176	0.096	0.000458098	BoneMarrow	N0
Csnk1g3	1.87856e-08	0.555897	0.143	0.074	0.000458893	BoneMarrow	N0
Ifngr1	1.88722e-08	0.546398	0.216	0.124	0.00046101	BoneMarrow	N0
Rnf44	1.89636e-08	0.675338	0.117	0.057	0.000463243	BoneMarrow	N0
Ciz1	1.92994e-08	0.690622	0.126	0.062	0.000471445	BoneMarrow	N0
Msantd3	1.94432e-08	0.537625	0.269	0.156	0.000474959	BoneMarrow	N0
Ankrd54	1.96665e-08	0.821808	0.11	0.052	0.000480414	BoneMarrow	N0
Orc4	1.96984e-08	0.61141	0.137	0.071	0.000481193	BoneMarrow	N0
Slc38a10	1.97079e-08	0.618622	0.143	0.074	0.000481426	BoneMarrow	N0
Ddx52	1.97565e-08	0.667077	0.15	0.079	0.000482612	BoneMarrow	N0
Trub2	1.99094e-08	0.671564	0.14	0.071	0.000486348	BoneMarrow	N0
Riox1	2.01029e-08	0.564463	0.194	0.108	0.000491073	BoneMarrow	N0
Mrpl46	2.03734e-08	0.66167	0.126	0.063	0.000497681	BoneMarrow	N0
Setd3	2.0423e-08	0.570086	0.209	0.119	0.000498893	BoneMarrow	N0
Kiz	2.062e-08	0.705259	0.139	0.071	0.000503705	BoneMarrow	N0
Tia1	2.07469e-08	0.596074	0.177	0.097	0.000506804	BoneMarrow	N0
Entpd5	2.11424e-08	0.552573	0.225	0.129	0.000516466	BoneMarrow	N0
Zfp451	2.1252e-08	0.753538	0.104	0.048	0.000519143	BoneMarrow	N0
Mcrip1	2.15427e-08	0.59312	0.167	0.09	0.000526246	BoneMarrow	N0
Pitpnm1	2.15978e-08	0.657706	0.117	0.057	0.000527592	BoneMarrow	N0
Gm46367	2.17811e-08	0.706458	0.138	0.071	0.00053207	BoneMarrow	N0
Slc6a13	2.18176e-08	0.71147	0.138	0.071	0.000532961	BoneMarrow	N0
Brix1	2.19215e-08	0.651448	0.135	0.068	0.000535497	BoneMarrow	N0
Rsl24d1	2.19965e-08	0.522902	0.246	0.142	0.000537329	BoneMarrow	N0
Ptrhd1	2.20344e-08	0.595598	0.164	0.088	0.000538257	BoneMarrow	N0
Coq4	2.23008e-08	0.740211	0.123	0.06	0.000544764	BoneMarrow	N0
Gin1	2.27709e-08	0.852195	0.103	0.047	0.000556248	BoneMarrow	N0
Arhgap10	2.45553e-08	0.648152	0.125	0.062	0.000599837	BoneMarrow	N0
Sdccag8	2.4559e-08	0.842208	0.104	0.048	0.000599927	BoneMarrow	N0
Pdss1	2.46178e-08	0.643852	0.145	0.076	0.000601362	BoneMarrow	N0
Tox4	2.54904e-08	0.572368	0.205	0.117	0.000622679	BoneMarrow	N0
Pafah2	2.60202e-08	0.773389	0.12	0.059	0.000635622	BoneMarrow	N0
Eml2	2.66442e-08	0.650144	0.133	0.067	0.000650865	BoneMarrow	N0
Tbpl1	2.67961e-08	0.633594	0.143	0.074	0.000654575	BoneMarrow	N0
Tubgcp2	2.77246e-08	0.709637	0.136	0.07	0.000677256	BoneMarrow	N0
Dclre1b	2.83274e-08	0.563062	0.167	0.09	0.000691983	BoneMarrow	N0
Yipf1	2.83607e-08	0.68647	0.132	0.067	0.000692795	BoneMarrow	N0
Patl1	2.89596e-08	0.541335	0.164	0.089	0.000707426	BoneMarrow	N0
Sf3a1	2.90551e-08	0.547499	0.178	0.097	0.000709759	BoneMarrow	N0
Gm20342	2.97585e-08	0.705316	0.131	0.066	0.000726941	BoneMarrow	N0
Ccdc86	2.98669e-08	0.603841	0.148	0.078	0.000729588	BoneMarrow	N0
Hccs	3.01347e-08	0.574897	0.164	0.088	0.00073613	BoneMarrow	N0
Tent4b	3.11795e-08	0.503703	0.147	0.077	0.000761653	BoneMarrow	N0
Gm56974	3.12506e-08	0.673524	0.141	0.073	0.000763389	BoneMarrow	N0
Mrgpra2a	3.1563e-08	0.727178	0.121	0.06	0.00077102	BoneMarrow	N0
Dera	3.1639e-08	0.610778	0.12	0.059	0.000772877	BoneMarrow	N0
Plagl2	3.19998e-08	0.575142	0.167	0.091	0.000781692	BoneMarrow	N0
Mrpl40	3.20551e-08	0.591904	0.179	0.098	0.000783041	BoneMarrow	N0
Ttc17	3.25404e-08	0.714621	0.129	0.066	0.000794898	BoneMarrow	N0
Dtnb	3.27177e-08	0.51438	0.216	0.124	0.000799228	BoneMarrow	N0
Rnpepl1	3.39406e-08	0.689422	0.124	0.062	0.0008291	BoneMarrow	N0
Cog5	3.39902e-08	0.540195	0.159	0.086	0.000830312	BoneMarrow	N0
Tet3	3.46596e-08	0.556677	0.152	0.081	0.000846664	BoneMarrow	N0
Mcm3ap	3.73627e-08	0.674858	0.134	0.069	0.000912697	BoneMarrow	N0
Ube2g2	3.77483e-08	0.626098	0.125	0.063	0.000922115	BoneMarrow	N0
Nus1	3.87118e-08	0.634643	0.108	0.052	0.000945651	BoneMarrow	N0
Ctdnep1	3.92349e-08	0.511288	0.198	0.111	0.000958429	BoneMarrow	N0
Trmt6	3.92832e-08	0.705487	0.116	0.057	0.000959609	BoneMarrow	N0
Htatsf1	3.92875e-08	0.644858	0.149	0.079	0.000959714	BoneMarrow	N0
Gm38575	4.0233e-08	0.678776	0.138	0.072	0.000982811	BoneMarrow	N0
Bltp2	4.07889e-08	0.644962	0.134	0.069	0.000996392	BoneMarrow	N0
Card9	4.0908e-08	0.567101	0.182	0.101	0.0009993	BoneMarrow	N0
Mtmr9	4.26948e-08	0.729389	0.115	0.056	0.00104295	BoneMarrow	N0
Dcaf13	4.27547e-08	0.544938	0.118	0.058	0.00104441	BoneMarrow	N0
Kdm3a	4.28754e-08	0.764942	0.105	0.05	0.00104736	BoneMarrow	N0
Fbxo22	4.39215e-08	0.704597	0.1	0.047	0.00107291	BoneMarrow	N0
Tm7sf3	4.39667e-08	0.509136	0.208	0.119	0.00107402	BoneMarrow	N0
Hip1r	4.49452e-08	0.560231	0.174	0.096	0.00109792	BoneMarrow	N0
Spg7	4.51907e-08	0.665364	0.12	0.06	0.00110392	BoneMarrow	N0
Marveld1	4.60638e-08	0.697087	0.119	0.059	0.00112525	BoneMarrow	N0
Trabd	4.64395e-08	0.545018	0.212	0.122	0.00113442	BoneMarrow	N0
Ugdh	4.72848e-08	0.528183	0.262	0.157	0.00115507	BoneMarrow	N0
Ctbp2	4.75554e-08	0.790991	0.1	0.047	0.00116168	BoneMarrow	N0
Lrp8	4.80092e-08	0.702923	0.124	0.063	0.00117277	BoneMarrow	N0
D16Ertd472e	4.8072e-08	0.554155	0.113	0.055	0.0011743	BoneMarrow	N0
Ocel1	4.89519e-08	0.721928	0.116	0.057	0.0011958	BoneMarrow	N0
Mettl23	4.9092e-08	0.525129	0.212	0.122	0.00119922	BoneMarrow	N0
Lrch3	4.92747e-08	0.636762	0.133	0.069	0.00120368	BoneMarrow	N0
Dcp1a	4.96558e-08	0.719444	0.108	0.052	0.00121299	BoneMarrow	N0
Rab22a	5.05179e-08	0.579613	0.166	0.091	0.00123405	BoneMarrow	N0
Rb1cc1	5.27818e-08	0.580945	0.182	0.104	0.00128935	BoneMarrow	N0
Lcmt1	5.34531e-08	0.693299	0.139	0.073	0.00130575	BoneMarrow	N0
Naa20	5.39125e-08	0.501025	0.256	0.149	0.00131697	BoneMarrow	N0
Dld	5.40067e-08	0.505914	0.188	0.106	0.00131928	BoneMarrow	N0
Med6	5.48888e-08	0.53754	0.213	0.122	0.00134082	BoneMarrow	N0
Tma16	5.58129e-08	0.747452	0.109	0.053	0.0013634	BoneMarrow	N0
Trappc11	5.5888e-08	0.771497	0.1	0.047	0.00136523	BoneMarrow	N0
Zfp414	5.65325e-08	0.574271	0.178	0.098	0.00138098	BoneMarrow	N0
Ap3m1	5.78724e-08	0.536968	0.208	0.119	0.00141371	BoneMarrow	N0
Vps18	6.02613e-08	0.65883	0.109	0.053	0.00147206	BoneMarrow	N0
Smim20	6.10035e-08	0.712914	0.121	0.061	0.00149019	BoneMarrow	N0
Zfp143	6.23654e-08	0.701466	0.121	0.061	0.00152346	BoneMarrow	N0
Gm56741	6.49882e-08	0.781713	0.113	0.056	0.00158753	BoneMarrow	N0
Yipf3	6.54248e-08	0.627322	0.145	0.076	0.0015982	BoneMarrow	N0
Reps1	6.54991e-08	0.521355	0.256	0.153	0.00160001	BoneMarrow	N0
Zfp141	6.55451e-08	0.640221	0.133	0.069	0.00160114	BoneMarrow	N0
Znhit3	6.58645e-08	0.584473	0.147	0.079	0.00160894	BoneMarrow	N0
Commd7	6.82352e-08	0.629633	0.118	0.059	0.00166685	BoneMarrow	N0
Sft2d2	6.87587e-08	0.778983	0.101	0.048	0.00167964	BoneMarrow	N0
Klhl12	6.91105e-08	0.67443	0.117	0.059	0.00168823	BoneMarrow	N0
Bloc1s4	6.92117e-08	0.597103	0.169	0.093	0.0016907	BoneMarrow	N0
Pym1	7.01835e-08	0.50871	0.192	0.108	0.00171444	BoneMarrow	N0
Senp3	7.07048e-08	0.660912	0.109	0.053	0.00172718	BoneMarrow	N0
Acot8	7.10269e-08	0.740522	0.116	0.057	0.00173505	BoneMarrow	N0
Slc35b1	7.20958e-08	0.768156	0.106	0.051	0.00176116	BoneMarrow	N0
Commd2	7.33542e-08	0.515726	0.223	0.13	0.0017919	BoneMarrow	N0
Yrdc	7.41843e-08	0.621511	0.15	0.081	0.00181217	BoneMarrow	N0
Tiam2	7.44218e-08	0.760803	0.101	0.048	0.00181798	BoneMarrow	N0
Prpf6	7.48253e-08	0.813359	0.108	0.052	0.00182783	BoneMarrow	N0
Nrbp1	7.52855e-08	0.504599	0.213	0.123	0.00183907	BoneMarrow	N0
Alg13	7.66183e-08	0.690512	0.124	0.063	0.00187163	BoneMarrow	N0
Acat1	7.87519e-08	0.595764	0.129	0.067	0.00192375	BoneMarrow	N0
Irak1	7.91624e-08	0.577602	0.151	0.082	0.00193378	BoneMarrow	N0
Eif4g3	8.06128e-08	0.50758	0.349	0.219	0.00196921	BoneMarrow	N0
Ubxn8	8.15269e-08	0.716248	0.122	0.062	0.00199154	BoneMarrow	N0
Pde8a	8.29301e-08	0.518296	0.252	0.151	0.00202582	BoneMarrow	N0
Bet1l	8.41582e-08	0.717903	0.103	0.049	0.00205582	BoneMarrow	N0
Mapk7	8.66595e-08	0.627978	0.156	0.085	0.00211692	BoneMarrow	N0
Mrpl2	8.69635e-08	0.663567	0.114	0.057	0.00212435	BoneMarrow	N0
Cenpj	8.74486e-08	0.711435	0.12	0.061	0.00213619	BoneMarrow	N0
Tollip	8.79401e-08	0.592211	0.178	0.101	0.0021482	BoneMarrow	N0
Dcaf10	8.88023e-08	0.607999	0.146	0.079	0.00216926	BoneMarrow	N0
Nup133	8.92047e-08	0.623565	0.123	0.063	0.00217909	BoneMarrow	N0
Slc28a2	9.02226e-08	0.575045	0.155	0.084	0.00220396	BoneMarrow	N0
Etaa1	9.14151e-08	0.627454	0.134	0.071	0.00223309	BoneMarrow	N0
Zfp511	9.25263e-08	0.666039	0.125	0.064	0.00226023	BoneMarrow	N0
Ldlrap1	9.30619e-08	0.517738	0.167	0.092	0.00227331	BoneMarrow	N0
Rnpc3	9.36339e-08	0.567543	0.116	0.058	0.00228729	BoneMarrow	N0
Triap1	9.45284e-08	0.73177	0.111	0.055	0.00230914	BoneMarrow	N0
Nod1	9.46671e-08	0.676045	0.137	0.073	0.00231253	BoneMarrow	N0
Samd4b	9.76384e-08	0.547057	0.136	0.072	0.00238511	BoneMarrow	N0
Cers5	9.8342e-08	0.528281	0.135	0.071	0.0024023	BoneMarrow	N0
Rnf139	9.83646e-08	0.607486	0.119	0.06	0.00240285	BoneMarrow	N0
Czib	9.85959e-08	0.610122	0.168	0.093	0.0024085	BoneMarrow	N0
Pgrmc1	9.893e-08	0.701971	0.103	0.049	0.00241666	BoneMarrow	N0
Itprip	9.90707e-08	0.641762	0.117	0.059	0.0024201	BoneMarrow	N0
Psph	1.00318e-07	0.732616	0.102	0.049	0.00245056	BoneMarrow	N0
Ccdc115	1.00574e-07	0.516415	0.208	0.119	0.00245682	BoneMarrow	N0
Ints2	1.0078e-07	0.762073	0.1	0.047	0.00246185	BoneMarrow	N0
Itgb1bp1	1.01743e-07	0.627381	0.119	0.06	0.00248539	BoneMarrow	N0
Smarcb1	1.04261e-07	0.563485	0.161	0.089	0.00254689	BoneMarrow	N0
Ksr1	1.05761e-07	0.691248	0.104	0.05	0.00258354	BoneMarrow	N0
Tnk2	1.05924e-07	0.718259	0.104	0.05	0.00258751	BoneMarrow	N0
Kxd1	1.0664e-07	0.6395	0.129	0.067	0.00260499	BoneMarrow	N0
Raver1	1.07549e-07	0.5316	0.172	0.095	0.00262721	BoneMarrow	N0
Vps37a	1.08616e-07	0.523166	0.154	0.084	0.00265326	BoneMarrow	N0
Arl1	1.13068e-07	0.514801	0.144	0.077	0.00276203	BoneMarrow	N0
Ncbp2	1.1342e-07	0.546676	0.139	0.074	0.00277063	BoneMarrow	N0
Trappc6a	1.15569e-07	0.528994	0.187	0.106	0.00282312	BoneMarrow	N0
Htatip2	1.25044e-07	0.663299	0.111	0.055	0.00305457	BoneMarrow	N0
Csnk1g2	1.25117e-07	0.549895	0.148	0.08	0.00305637	BoneMarrow	N0
Taf6	1.252e-07	0.638113	0.14	0.075	0.00305838	BoneMarrow	N0
Por	1.25859e-07	0.816285	0.108	0.054	0.00307449	BoneMarrow	N0
Zmym2	1.26671e-07	0.522301	0.125	0.064	0.00309432	BoneMarrow	N0
St3gal2	1.27025e-07	0.50989	0.168	0.093	0.00310296	BoneMarrow	N0
Twf1	1.28488e-07	0.646036	0.121	0.062	0.00313871	BoneMarrow	N0
Il10rb	1.29539e-07	0.595695	0.176	0.1	0.00316438	BoneMarrow	N0
Fbh1	1.30219e-07	0.661112	0.105	0.051	0.003181	BoneMarrow	N0
Mphosph10	1.30463e-07	0.543267	0.14	0.075	0.00318696	BoneMarrow	N0
Pex7	1.31007e-07	0.537168	0.157	0.086	0.00320023	BoneMarrow	N0
Map3k9	1.31454e-07	0.634159	0.125	0.065	0.00321116	BoneMarrow	N0
Appl1	1.31677e-07	0.51078	0.182	0.103	0.00321661	BoneMarrow	N0
Tmem41b	1.37334e-07	0.533065	0.159	0.088	0.0033548	BoneMarrow	N0
Afdn	1.39941e-07	0.6837	0.109	0.054	0.00341848	BoneMarrow	N0
Ndufa9	1.4074e-07	0.571004	0.158	0.087	0.00343799	BoneMarrow	N0
Kat6a	1.41326e-07	0.505222	0.155	0.085	0.0034523	BoneMarrow	N0
Gmeb1	1.41504e-07	0.513403	0.159	0.088	0.00345665	BoneMarrow	N0
Ing3	1.42204e-07	0.540385	0.214	0.127	0.00347376	BoneMarrow	N0
Ube4a	1.42695e-07	0.652744	0.13	0.068	0.00348576	BoneMarrow	N0
Kcnab2	1.43049e-07	0.51822	0.203	0.117	0.00349439	BoneMarrow	N0
Mocs2	1.43647e-07	0.636721	0.1	0.048	0.003509	BoneMarrow	N0
Ppip5k2	1.47708e-07	0.648997	0.119	0.06	0.00360821	BoneMarrow	N0
Slc17a9	1.48571e-07	0.568017	0.165	0.092	0.0036293	BoneMarrow	N0
Efl1	1.49188e-07	0.700743	0.101	0.049	0.00364436	BoneMarrow	N0
Ppa2	1.50336e-07	0.648631	0.12	0.061	0.0036724	BoneMarrow	N0
5330438D12Rik	1.55504e-07	0.62852	0.117	0.06	0.00379864	BoneMarrow	N0
Clec2d	1.55596e-07	0.629565	0.14	0.075	0.0038009	BoneMarrow	N0
Atf7	1.59723e-07	0.607254	0.13	0.068	0.00390171	BoneMarrow	N0
Eml3	1.60035e-07	0.712626	0.106	0.052	0.00390933	BoneMarrow	N0
Nol11	1.62648e-07	0.648501	0.124	0.064	0.00397315	BoneMarrow	N0
9830166K06Rik	1.62759e-07	0.670664	0.129	0.068	0.00397587	BoneMarrow	N0
Prpf31	1.65293e-07	0.688306	0.116	0.059	0.00403777	BoneMarrow	N0
Mtmr12	1.67886e-07	0.667733	0.106	0.052	0.00410113	BoneMarrow	N0
Norad	1.69294e-07	0.66638	0.118	0.06	0.00413551	BoneMarrow	N0
Bet1	1.7142e-07	0.536261	0.148	0.081	0.00418744	BoneMarrow	N0
Rexo1	1.73795e-07	0.522655	0.179	0.103	0.00424547	BoneMarrow	N0
Ssbp4	1.75729e-07	0.520805	0.216	0.127	0.00429271	BoneMarrow	N0
Cenpt	1.77653e-07	0.686533	0.121	0.063	0.0043397	BoneMarrow	N0
Chmp1b2	1.77999e-07	0.697373	0.111	0.055	0.00434816	BoneMarrow	N0
Polb	1.84333e-07	0.538097	0.165	0.092	0.00450289	BoneMarrow	N0
Pdlim2	1.86264e-07	0.561893	0.154	0.085	0.00455006	BoneMarrow	N0
Ubr7	1.89113e-07	0.54902	0.171	0.097	0.00461966	BoneMarrow	N0
Acbd3	1.90747e-07	0.577733	0.13	0.069	0.00465957	BoneMarrow	N0
Tmem222	1.93817e-07	0.637789	0.116	0.06	0.00473456	BoneMarrow	N0
Serinc1	1.94299e-07	0.573159	0.129	0.068	0.00474632	BoneMarrow	N0
Rbm4	1.95086e-07	0.713976	0.101	0.049	0.00476557	BoneMarrow	N0
Brcc3	1.98492e-07	0.510117	0.169	0.095	0.00484877	BoneMarrow	N0
Rps6ka2	2.00541e-07	0.632411	0.146	0.082	0.00489883	BoneMarrow	N0
Aqr	2.02145e-07	0.54143	0.145	0.079	0.00493799	BoneMarrow	N0
Mical1	2.0215e-07	0.614642	0.119	0.062	0.00493812	BoneMarrow	N0
Tmem205	2.05659e-07	0.576747	0.143	0.077	0.00502384	BoneMarrow	N0
Vwa8	2.13085e-07	0.655641	0.117	0.06	0.00520524	BoneMarrow	N0
Gmcl1	2.17469e-07	0.614545	0.111	0.056	0.00531233	BoneMarrow	N0
Arrdc1	2.18408e-07	0.589039	0.15	0.082	0.00533527	BoneMarrow	N0
Vps16	2.2541e-07	0.634889	0.11	0.055	0.00550631	BoneMarrow	N0
Pom121	2.30895e-07	0.555389	0.159	0.089	0.00564031	BoneMarrow	N0
Kmt5c	2.31646e-07	0.500108	0.193	0.111	0.00565865	BoneMarrow	N0
Dmtf1	2.35204e-07	0.548779	0.155	0.086	0.00574555	BoneMarrow	N0
Atp9b	2.36453e-07	0.546994	0.152	0.084	0.00577608	BoneMarrow	N0
Haus1	2.3884e-07	0.726173	0.103	0.051	0.00583437	BoneMarrow	N0
Pigt	2.48191e-07	0.655191	0.116	0.06	0.0060628	BoneMarrow	N0
Hps3	2.50108e-07	0.62039	0.111	0.056	0.00610965	BoneMarrow	N0
Dhps	2.54781e-07	0.733404	0.1	0.049	0.0062238	BoneMarrow	N0
Dctn1	2.55327e-07	0.51956	0.179	0.102	0.00623714	BoneMarrow	N0
Syap1	2.55926e-07	0.67273	0.119	0.062	0.00625175	BoneMarrow	N0
Golga2	2.56273e-07	0.716689	0.106	0.053	0.00626025	BoneMarrow	N0
Arf3	2.62514e-07	0.511794	0.162	0.091	0.0064127	BoneMarrow	N0
Vps35l	2.63295e-07	0.570374	0.108	0.054	0.00643177	BoneMarrow	N0
Fam217b	2.63542e-07	0.658402	0.106	0.053	0.00643781	BoneMarrow	N0
Arid3b	2.63785e-07	0.68542	0.107	0.054	0.00644374	BoneMarrow	N0
Usp48	2.64935e-07	0.612237	0.126	0.067	0.00647183	BoneMarrow	N0
Usp38	2.69319e-07	0.537851	0.125	0.066	0.00657892	BoneMarrow	N0
Ttyh3	2.69724e-07	0.638095	0.125	0.066	0.00658882	BoneMarrow	N0
Sh2b1	2.71647e-07	0.536391	0.159	0.089	0.00663579	BoneMarrow	N0
Orc3	2.7559e-07	0.550029	0.132	0.071	0.00673211	BoneMarrow	N0
Rnf2	2.8018e-07	0.548417	0.131	0.07	0.00684423	BoneMarrow	N0
Chuk	2.85282e-07	0.521997	0.141	0.076	0.00696886	BoneMarrow	N0
Dnajc4	2.87232e-07	0.649593	0.119	0.062	0.00701651	BoneMarrow	N0
Arl2bp	2.8869e-07	0.649603	0.132	0.071	0.00705211	BoneMarrow	N0
Ppp2r2d	2.93302e-07	0.523856	0.22	0.131	0.00716478	BoneMarrow	N0
Eno1b	2.9929e-07	0.669711	0.111	0.056	0.00731106	BoneMarrow	N0
Naa10	3.0095e-07	0.652345	0.13	0.069	0.00735161	BoneMarrow	N0
Zmym5	3.02324e-07	0.620837	0.105	0.052	0.00738517	BoneMarrow	N0
Ints3	3.02893e-07	0.745087	0.106	0.053	0.00739908	BoneMarrow	N0
Gtf3c6	3.18657e-07	0.598631	0.114	0.059	0.00778416	BoneMarrow	N0
Tmem219	3.19929e-07	0.564252	0.142	0.077	0.00781523	BoneMarrow	N0
Ndfip2	3.2138e-07	0.536138	0.173	0.099	0.00785066	BoneMarrow	N0
Xrcc6	3.23834e-07	0.611579	0.12	0.063	0.00791061	BoneMarrow	N0
Togaram1	3.25748e-07	0.608137	0.114	0.059	0.00795738	BoneMarrow	N0
Tmem60	3.27314e-07	0.596012	0.114	0.059	0.00799562	BoneMarrow	N0
Tasor	3.35451e-07	0.502721	0.171	0.098	0.00819441	BoneMarrow	N0
U2af1l4	3.40807e-07	0.58908	0.14	0.077	0.00832524	BoneMarrow	N0
Pcid2	3.41026e-07	0.614931	0.105	0.053	0.00833058	BoneMarrow	N0
Gabpb1	3.45881e-07	0.515461	0.199	0.118	0.00844917	BoneMarrow	N0
Atf6b	3.47127e-07	0.670235	0.102	0.05	0.00847963	BoneMarrow	N0
Polr2d	3.48061e-07	0.50957	0.153	0.085	0.00850244	BoneMarrow	N0
Ss18l2	3.5847e-07	0.545021	0.145	0.079	0.0087567	BoneMarrow	N0
Copg1	3.61375e-07	0.530231	0.14	0.077	0.00882766	BoneMarrow	N0
Amd1	3.6397e-07	0.678748	0.11	0.057	0.00889107	BoneMarrow	N0
Tsen34	3.72637e-07	0.57007	0.127	0.068	0.00910278	BoneMarrow	N0
Hibadh	3.73874e-07	0.604465	0.147	0.082	0.00913298	BoneMarrow	N0
Prps1	3.81211e-07	0.57718	0.125	0.067	0.00931223	BoneMarrow	N0
Rbck1	3.84882e-07	0.564809	0.13	0.07	0.0094019	BoneMarrow	N0
Stx12	3.86304e-07	0.651826	0.119	0.063	0.00943664	BoneMarrow	N0
Ublcp1	3.97294e-07	0.536235	0.145	0.081	0.0097051	BoneMarrow	N0
Ythdc2	4.01723e-07	0.613778	0.131	0.071	0.00981329	BoneMarrow	N0
Zdhhc5	4.02005e-07	0.564338	0.143	0.079	0.00982017	BoneMarrow	N0
Pabpc1l	4.06551e-07	0.757919	0.101	0.05	0.00993122	BoneMarrow	N0
Prpf19	4.14164e-07	0.566905	0.105	0.053	0.0101172	BoneMarrow	N0
Spsb2	4.1451e-07	0.576096	0.132	0.071	0.0101257	BoneMarrow	N0
Gle1	4.16746e-07	0.543513	0.152	0.085	0.0101803	BoneMarrow	N0
Gorasp2	4.21601e-07	0.553682	0.13	0.07	0.0102989	BoneMarrow	N0
Itpr2	4.21804e-07	0.537331	0.151	0.085	0.0103038	BoneMarrow	N0
Hlcs	4.23563e-07	0.72448	0.116	0.06	0.0103468	BoneMarrow	N0
2700099C18Rik	4.34541e-07	0.561312	0.157	0.089	0.010615	BoneMarrow	N0
Cwc27	4.35418e-07	0.528273	0.159	0.09	0.0106364	BoneMarrow	N0
Nifk	4.35458e-07	0.517678	0.134	0.073	0.0106374	BoneMarrow	N0
4933434E20Rik	4.39467e-07	0.628447	0.104	0.052	0.0107353	BoneMarrow	N0
Vapb	4.40365e-07	0.522963	0.101	0.05	0.0107572	BoneMarrow	N0
Rnf121	4.47154e-07	0.604668	0.115	0.06	0.0109231	BoneMarrow	N0
Tap2	4.51503e-07	0.534166	0.183	0.106	0.0110293	BoneMarrow	N0
Idnk	4.52052e-07	0.680077	0.11	0.056	0.0110427	BoneMarrow	N0
Gpank1	4.56576e-07	0.620609	0.12	0.063	0.0111532	BoneMarrow	N0
Tfeb	4.57797e-07	0.6844	0.112	0.058	0.0111831	BoneMarrow	N0
Pikfyve	4.65326e-07	0.637525	0.112	0.058	0.011367	BoneMarrow	N0
Orai2	4.67044e-07	0.555115	0.167	0.097	0.0114089	BoneMarrow	N0
Fbrs	4.68802e-07	0.581226	0.133	0.073	0.0114519	BoneMarrow	N0
Mprip	4.70355e-07	0.517236	0.117	0.061	0.0114898	BoneMarrow	N0
Cep135	4.74363e-07	0.587971	0.137	0.075	0.0115877	BoneMarrow	N0
2410004B18Rik	4.8731e-07	0.639803	0.12	0.063	0.011904	BoneMarrow	N0
Zfp217	4.87342e-07	0.580052	0.131	0.071	0.0119048	BoneMarrow	N0
Abhd10	4.89166e-07	0.557295	0.159	0.09	0.0119493	BoneMarrow	N0
Gm50022	4.97645e-07	0.573643	0.132	0.072	0.0121565	BoneMarrow	N0
Dennd10	4.99813e-07	0.744626	0.105	0.054	0.0122094	BoneMarrow	N0
Vps37c	5.15136e-07	0.650647	0.111	0.057	0.0125837	BoneMarrow	N0
Kansl1l	5.23515e-07	0.501801	0.202	0.122	0.0127884	BoneMarrow	N0
Tmem11	5.47581e-07	0.533547	0.148	0.082	0.0133763	BoneMarrow	N0
Pnrc2	5.56707e-07	0.538351	0.18	0.106	0.0135992	BoneMarrow	N0
4921524J17Rik	5.57592e-07	0.583503	0.128	0.069	0.0136208	BoneMarrow	N0
Nipsnap3b	5.62161e-07	0.501377	0.215	0.129	0.0137325	BoneMarrow	N0
Angel2	5.69061e-07	0.51621	0.169	0.097	0.013901	BoneMarrow	N0
Tmem87a	5.72232e-07	0.5067	0.126	0.068	0.0139785	BoneMarrow	N0
Ap3d1	5.90613e-07	0.631425	0.103	0.052	0.0144275	BoneMarrow	N0
Mettl6	6.03392e-07	0.62702	0.112	0.058	0.0147397	BoneMarrow	N0
I830077J02Rik	6.11705e-07	0.67976	0.108	0.055	0.0149427	BoneMarrow	N0
Zmat5	6.12786e-07	0.519301	0.15	0.084	0.0149691	BoneMarrow	N0
Acox3	6.23192e-07	0.591475	0.11	0.057	0.0152233	BoneMarrow	N0
2610507I01Rik	6.35829e-07	0.583929	0.147	0.082	0.015532	BoneMarrow	N0
Csnk2a2	6.37405e-07	0.568344	0.115	0.06	0.0155705	BoneMarrow	N0
Tmem251	6.50976e-07	0.504177	0.121	0.065	0.015902	BoneMarrow	N0
Ino80c	6.65446e-07	0.631515	0.118	0.063	0.0162555	BoneMarrow	N0
B4galt3	6.68955e-07	0.562504	0.149	0.084	0.0163412	BoneMarrow	N0
Ing5	6.70217e-07	0.575119	0.143	0.08	0.0163721	BoneMarrow	N0
Dstyk	6.76616e-07	0.584421	0.124	0.066	0.0165284	BoneMarrow	N0
Slc35a5	6.79237e-07	0.573473	0.126	0.068	0.0165924	BoneMarrow	N0
Recql	6.79538e-07	0.616529	0.115	0.06	0.0165998	BoneMarrow	N0
Dnajc24	6.8262e-07	0.658576	0.108	0.056	0.016675	BoneMarrow	N0
Trp53inp1	7.25881e-07	0.565863	0.116	0.062	0.0177318	BoneMarrow	N0
Yipf5	7.39553e-07	0.598721	0.115	0.06	0.0180658	BoneMarrow	N0
Zfp609	7.55251e-07	0.513687	0.112	0.059	0.0184493	BoneMarrow	N0
Mrpl10	7.75343e-07	0.59605	0.114	0.06	0.0189401	BoneMarrow	N0
Akap9	7.85904e-07	0.539127	0.162	0.094	0.0191981	BoneMarrow	N0
Anapc4	7.90481e-07	0.618407	0.101	0.051	0.0193099	BoneMarrow	N0
Nomo1	8.106e-07	0.656515	0.103	0.052	0.0198013	BoneMarrow	N0
Rpp30	8.20895e-07	0.502245	0.161	0.092	0.0200528	BoneMarrow	N0
Osbp	8.25053e-07	0.577174	0.118	0.063	0.0201544	BoneMarrow	N0
Ppp1r21	8.46856e-07	0.654309	0.102	0.052	0.020687	BoneMarrow	N0
Med11	8.64495e-07	0.596423	0.109	0.057	0.0211179	BoneMarrow	N0
Parp4	8.91373e-07	0.506954	0.151	0.086	0.0217745	BoneMarrow	N0
Tnfaip8l2	8.95014e-07	0.709024	0.104	0.054	0.0218634	BoneMarrow	N0
Snrk	8.95957e-07	0.508517	0.166	0.097	0.0218864	BoneMarrow	N0
Actr1a	9.13324e-07	0.552121	0.132	0.073	0.0223107	BoneMarrow	N0
Hmg20b	9.16748e-07	0.548256	0.132	0.073	0.0223943	BoneMarrow	N0
Usf3	9.22181e-07	0.648407	0.113	0.06	0.022527	BoneMarrow	N0
Wipf2	9.32317e-07	0.533057	0.122	0.066	0.0227746	BoneMarrow	N0
Suv39h1	9.34047e-07	0.500486	0.136	0.076	0.0228169	BoneMarrow	N0
Ikbkg	9.34586e-07	0.661647	0.101	0.052	0.0228301	BoneMarrow	N0
Phkg2	9.50764e-07	0.567322	0.141	0.079	0.0232253	BoneMarrow	N0
Tex15	9.64026e-07	0.548038	0.101	0.052	0.0235492	BoneMarrow	N0
Akap8	9.64806e-07	0.538389	0.13	0.071	0.0235683	BoneMarrow	N0
Cybc1	1.00038e-06	0.641661	0.108	0.056	0.0244372	BoneMarrow	N0
Tbcc	1.00073e-06	0.549073	0.133	0.074	0.0244457	BoneMarrow	N0
Pex5	1.02048e-06	0.687859	0.101	0.052	0.0249282	BoneMarrow	N0
Scnn1a	1.06142e-06	0.514914	0.14	0.079	0.0259283	BoneMarrow	N0
Slc25a17	1.07883e-06	0.587144	0.122	0.066	0.0263537	BoneMarrow	N0
Rnf40	1.09874e-06	0.682588	0.11	0.058	0.02684	BoneMarrow	N0
Baz2a	1.12334e-06	0.515919	0.144	0.082	0.0274411	BoneMarrow	N0
Mrps25	1.13495e-06	0.51059	0.123	0.067	0.0277245	BoneMarrow	N0
5031425E22Rik	1.16022e-06	0.55142	0.111	0.059	0.0283418	BoneMarrow	N0
Zfp236	1.16517e-06	0.641282	0.107	0.056	0.0284628	BoneMarrow	N0
Cpsf3	1.16954e-06	0.62481	0.116	0.062	0.0285695	BoneMarrow	N0
Tmc8	1.17655e-06	0.53532	0.138	0.077	0.0287408	BoneMarrow	N0
2310011J03Rik	1.17838e-06	0.533709	0.139	0.078	0.0287854	BoneMarrow	N0
Kif3b	1.18901e-06	0.605793	0.114	0.061	0.0290451	BoneMarrow	N0
Echs1	1.19678e-06	0.503988	0.142	0.08	0.0292349	BoneMarrow	N0
Fbxo30	1.2357e-06	0.510819	0.184	0.111	0.0301858	BoneMarrow	N0
Gt(ROSA)26Sor	1.25054e-06	0.541852	0.13	0.072	0.0305483	BoneMarrow	N0
Cln5	1.25608e-06	0.621615	0.115	0.061	0.0306834	BoneMarrow	N0
Zcchc2	1.25726e-06	0.613095	0.101	0.052	0.0307122	BoneMarrow	N0
Zfp622	1.25884e-06	0.536629	0.29	0.189	0.0307509	BoneMarrow	N0
Idh3b	1.26123e-06	0.571193	0.112	0.06	0.0308093	BoneMarrow	N0
Prmt9	1.26264e-06	0.627741	0.104	0.054	0.0308439	BoneMarrow	N0
Med9	1.26912e-06	0.516384	0.139	0.078	0.0310022	BoneMarrow	N0
Lmf2	1.3129e-06	0.550734	0.13	0.071	0.0320715	BoneMarrow	N0
Ccnk	1.33398e-06	0.548266	0.142	0.08	0.0325864	BoneMarrow	N0
Slc35b3	1.34292e-06	0.670555	0.109	0.057	0.0328048	BoneMarrow	N0
Rnf14	1.35046e-06	0.510689	0.152	0.087	0.0329891	BoneMarrow	N0
Hbs1l	1.3804e-06	0.504247	0.159	0.092	0.0337205	BoneMarrow	N0
Med24	1.38586e-06	0.537303	0.1	0.052	0.0338537	BoneMarrow	N0
Thoc2l	1.44065e-06	0.542883	0.122	0.067	0.0351922	BoneMarrow	N0
Eipr1	1.53252e-06	0.514162	0.116	0.063	0.0374364	BoneMarrow	N0
Ube4b	1.53875e-06	0.579465	0.108	0.057	0.0375886	BoneMarrow	N0
Kctd18	1.59854e-06	0.632636	0.118	0.064	0.0390491	BoneMarrow	N0
Atxn7l3	1.62399e-06	0.533093	0.167	0.098	0.0396707	BoneMarrow	N0
Cxxc1	1.63367e-06	0.529779	0.114	0.061	0.0399074	BoneMarrow	N0
Helb	1.64687e-06	0.622719	0.102	0.053	0.0402297	BoneMarrow	N0
Coa6	1.69245e-06	0.551627	0.118	0.064	0.0413431	BoneMarrow	N0
Gm16192	1.69331e-06	0.649703	0.101	0.052	0.0413643	BoneMarrow	N0
Trim8	1.75819e-06	0.548109	0.15	0.087	0.0429491	BoneMarrow	N0
Cherp	1.85594e-06	0.517375	0.142	0.08	0.045337	BoneMarrow	N0
Scfd1	1.86524e-06	0.592476	0.12	0.066	0.0455641	BoneMarrow	N0
Nxn	1.9139e-06	0.500969	0.332	0.217	0.0467527	BoneMarrow	N0
Dnttip2	1.95935e-06	0.504625	0.151	0.087	0.047863	BoneMarrow	N0
Dpp9	1.9809e-06	0.584625	0.118	0.064	0.0483894	BoneMarrow	N0
Nub1	1.9819e-06	0.522238	0.124	0.068	0.0484138	BoneMarrow	N0
Ppp2r3c	1.9859e-06	0.646043	0.104	0.055	0.0485115	BoneMarrow	N0
Adprm	2.00847e-06	0.532476	0.11	0.059	0.0490629	BoneMarrow	N0
Gene	p_val	avg_log2FC	pct.1	pct.2	p_val_adj	Tissue	Subset
F630028O10Rik	4.57747e-176	0.621373	0.984	0.896	1.11818e-171	Spleen	N1
Hlx	9.59273e-142	0.781994	0.632	0.422	2.34331e-137	Spleen	N1
Megf9	2.4515e-129	0.589762	0.823	0.66	5.98851e-125	Spleen	N1
Plscr1	1.11695e-99	0.619364	0.64	0.47	2.72848e-95	Spleen	N1
Cd74	3.02822e-94	5.58121	0.1	0.012	7.39734e-90	Spleen	N1
Slco4c1	5.98024e-94	0.614575	0.594	0.43	1.46085e-89	Spleen	N1
Rps29	2.16571e-90	0.520047	0.971	0.92	5.29039e-86	Spleen	N1
Gca	1.66049e-85	0.583074	0.557	0.41	4.05625e-81	Spleen	N1
Cebpe	3.13921e-84	0.547429	0.667	0.52	7.66847e-80	Spleen	N1
Inhba	5.3324e-83	0.730633	0.479	0.318	1.3026e-78	Spleen	N1
Cmah	4.12895e-79	0.849751	0.432	0.273	1.00862e-74	Spleen	N1
Lipg	2.44571e-77	2.04055	0.137	0.036	5.97438e-73	Spleen	N1
Igkc	2.49627e-73	4.70825	0.108	0.023	6.09789e-69	Spleen	N1
Ly75	1.06387e-72	0.503862	0.569	0.423	2.59883e-68	Spleen	N1
1500015L24Rik	8.00946e-70	0.599458	0.485	0.344	1.95655e-65	Spleen	N1
Marchf1	6.33868e-60	0.583777	0.605	0.496	1.54841e-55	Spleen	N1
Rpl39	2.37075e-59	0.706322	0.763	0.71	5.79126e-55	Spleen	N1
Tmem256	3.76423e-58	0.627463	0.434	0.32	9.19526e-54	Spleen	N1
Orm1	8.57669e-55	0.6354	0.533	0.393	2.09511e-50	Spleen	N1
Rps20	3.58003e-52	0.704143	0.796	0.745	8.74531e-48	Spleen	N1
Ldhc	2.44354e-49	1.1234	0.208	0.105	5.96907e-45	Spleen	N1
Rps19	1.15974e-47	0.625647	0.752	0.688	2.83302e-43	Spleen	N1
Cd200r1	5.21267e-46	0.785423	0.275	0.167	1.27335e-41	Spleen	N1
Rps28	4.55338e-44	0.55134	0.72	0.664	1.1123e-39	Spleen	N1
Ica1	6.83614e-43	0.64028	0.354	0.245	1.66993e-38	Spleen	N1
Cpa6	1.96442e-42	0.525439	0.384	0.278	4.79869e-38	Spleen	N1
Gm57005	2.3182e-40	0.516523	0.402	0.302	5.6629e-36	Spleen	N1
AI839979	1.01802e-38	0.753365	0.259	0.16	2.48682e-34	Spleen	N1
1700020L24Rik	8.29463e-35	0.768257	0.246	0.157	2.02621e-30	Spleen	N1
Pigbos1	2.48936e-34	0.677069	0.266	0.178	6.081e-30	Spleen	N1
Rpsa	1.55698e-33	0.518478	0.675	0.636	3.80339e-29	Spleen	N1
Gm57199	3.60562e-33	0.950029	0.183	0.102	8.80781e-29	Spleen	N1
B430010I23Rik	5.2431e-32	0.822538	0.203	0.123	1.28078e-27	Spleen	N1
Usp39	4.6073e-29	0.668097	0.24	0.161	1.12547e-24	Spleen	N1
Mgam	4.37232e-28	0.516133	0.287	0.201	1.06807e-23	Spleen	N1
Gm34680	3.87368e-27	0.754721	0.21	0.137	9.46263e-23	Spleen	N1
Kcnj2	5.14803e-27	0.90785	0.151	0.083	1.25756e-22	Spleen	N1
Pak1	5.459e-27	0.691286	0.236	0.159	1.33352e-22	Spleen	N1
Cd38	2.12933e-26	1.01065	0.141	0.075	5.20154e-22	Spleen	N1
Ehbp1l1	3.75411e-26	0.629692	0.232	0.155	9.17053e-22	Spleen	N1
Erg	6.90766e-26	0.594695	0.249	0.174	1.6874e-21	Spleen	N1
Klra17	2.50086e-24	0.990408	0.117	0.059	6.1091e-20	Spleen	N1
Zbtb7b	1.13436e-23	0.773525	0.184	0.117	2.77101e-19	Spleen	N1
Pla2g4a	1.92358e-23	0.785686	0.188	0.121	4.69893e-19	Spleen	N1
Zfyve27	1.82264e-21	0.535169	0.247	0.183	4.45234e-17	Spleen	N1
Panct2	2.51755e-21	0.945621	0.124	0.069	6.14987e-17	Spleen	N1
Ap2a2	3.06505e-21	0.548445	0.247	0.184	7.4873e-17	Spleen	N1
Gm13431	3.87314e-21	1.0867	0.105	0.055	9.46132e-17	Spleen	N1
Ada	3.99796e-21	0.727355	0.175	0.115	9.76622e-17	Spleen	N1
Fcnb	8.94972e-21	0.500316	0.34	0.259	2.18624e-16	Spleen	N1
Cep128	1.22335e-20	0.576568	0.225	0.159	2.98841e-16	Spleen	N1
Aph1b	1.29294e-20	0.597774	0.212	0.148	3.1584e-16	Spleen	N1
Mlst8	1.57635e-20	0.580716	0.23	0.169	3.85071e-16	Spleen	N1
Galc	1.18042e-19	0.620585	0.21	0.149	2.88353e-15	Spleen	N1
Tesk2	1.34438e-19	0.639393	0.191	0.13	3.28406e-15	Spleen	N1
Slc35a5	1.95121e-19	0.642082	0.199	0.138	4.76642e-15	Spleen	N1
Apaf1	2.00702e-19	0.522542	0.23	0.167	4.90274e-15	Spleen	N1
Cldn15	2.2653e-19	0.554522	0.221	0.161	5.53366e-15	Spleen	N1
Ear2	8.35645e-19	0.658014	0.18	0.12	2.04131e-14	Spleen	N1
B4galt6	2.21788e-18	0.79149	0.136	0.083	5.41783e-14	Spleen	N1
Zfp445	2.49929e-18	0.570733	0.206	0.148	6.10528e-14	Spleen	N1
Gpr65	5.08244e-18	0.728856	0.157	0.103	1.24154e-13	Spleen	N1
Gcc2	1.45828e-17	0.701693	0.16	0.106	3.56228e-13	Spleen	N1
S100a1	1.57686e-17	0.754928	0.146	0.094	3.85196e-13	Spleen	N1
C1rl	2.26278e-17	0.667935	0.169	0.114	5.52752e-13	Spleen	N1
Oprm1	1.15004e-16	0.587313	0.181	0.126	2.80931e-12	Spleen	N1
4632427E13Rik	1.94311e-16	0.556229	0.198	0.143	4.74663e-12	Spleen	N1
Scmh1	2.27376e-16	0.736818	0.146	0.095	5.55433e-12	Spleen	N1
Pde6d	2.81055e-16	0.897226	0.108	0.064	6.8656e-12	Spleen	N1
Gatm	1.44814e-15	0.892634	0.107	0.063	3.53752e-11	Spleen	N1
Ffar2	3.41252e-15	0.541522	0.197	0.149	8.33611e-11	Spleen	N1
Acadsb	4.8186e-15	0.602984	0.165	0.115	1.17709e-10	Spleen	N1
Dynlt1f	6.22614e-15	0.566731	0.186	0.136	1.52092e-10	Spleen	N1
Arhgap19	7.81821e-15	0.661924	0.162	0.113	1.90983e-10	Spleen	N1
Dok2	8.3332e-15	0.609678	0.169	0.119	2.03563e-10	Spleen	N1
Mapk4	1.06508e-14	0.756365	0.123	0.078	2.60177e-10	Spleen	N1
Bod1l	1.43802e-14	0.504672	0.19	0.14	3.51278e-10	Spleen	N1
Bank1	1.90497e-14	1.86122	0.128	0.084	4.65345e-10	Spleen	N1
2610037D02Rik	1.96776e-14	0.707443	0.129	0.084	4.80684e-10	Spleen	N1
Nkiras2	3.99697e-14	0.621036	0.152	0.105	9.76379e-10	Spleen	N1
Afdn	4.67817e-14	0.657391	0.136	0.09	1.14278e-09	Spleen	N1
Kri1	8.02416e-14	0.553559	0.18	0.133	1.96014e-09	Spleen	N1
Hgf	1.0929e-13	0.658942	0.133	0.087	2.66974e-09	Spleen	N1
Tspan32	1.32968e-13	0.577252	0.169	0.123	3.24815e-09	Spleen	N1
AU040320	1.41814e-13	0.605651	0.154	0.107	3.46424e-09	Spleen	N1
Tex15	2.74584e-13	0.51201	0.192	0.146	6.70755e-09	Spleen	N1
Rgl2	3.05107e-13	0.542983	0.175	0.129	7.45315e-09	Spleen	N1
Ccdc167	5.22444e-13	0.603115	0.15	0.106	1.27623e-08	Spleen	N1
Cnpy2	5.44046e-13	0.825206	0.107	0.068	1.329e-08	Spleen	N1
Fkbp2	5.54676e-13	0.578439	0.156	0.112	1.35496e-08	Spleen	N1
Mrpl51	6.42141e-13	0.54427	0.18	0.136	1.56862e-08	Spleen	N1
Zfp414	7.59843e-13	0.647434	0.131	0.089	1.85614e-08	Spleen	N1
Nlrx1	9.10599e-13	0.604456	0.149	0.106	2.22441e-08	Spleen	N1
Gm38575	9.73594e-13	0.778655	0.102	0.063	2.37829e-08	Spleen	N1
Gm36738	9.97897e-13	0.713726	0.123	0.082	2.43766e-08	Spleen	N1
Atg4a	1.92278e-12	0.889521	0.11	0.07	4.69698e-08	Spleen	N1
Prorsd1	1.937e-12	0.533866	0.161	0.117	4.73169e-08	Spleen	N1
Ms4a3	2.05903e-12	0.70432	0.134	0.091	5.0298e-08	Spleen	N1
Fam53b	2.68783e-12	0.614381	0.151	0.109	6.56583e-08	Spleen	N1
Tmem39a	6.41171e-12	0.645951	0.117	0.077	1.56625e-07	Spleen	N1
Supt3	6.60799e-12	0.731471	0.105	0.067	1.6142e-07	Spleen	N1
Dhrs11	9.07401e-12	0.695274	0.119	0.08	2.2166e-07	Spleen	N1
Gm38843	1.40714e-11	0.56782	0.144	0.103	3.43736e-07	Spleen	N1
Ufsp2	1.75794e-11	0.68064	0.109	0.071	4.29429e-07	Spleen	N1
Zscan29	1.95851e-11	0.553924	0.149	0.108	4.78425e-07	Spleen	N1
Gm16192	2.67367e-11	0.665894	0.119	0.081	6.53124e-07	Spleen	N1
Dclre1b	3.00082e-11	0.735512	0.112	0.075	7.3304e-07	Spleen	N1
Ikbkg	3.0191e-11	0.633066	0.127	0.089	7.37506e-07	Spleen	N1
Psmc1	3.02578e-11	0.61791	0.13	0.091	7.39138e-07	Spleen	N1
Specc1	4.75721e-11	0.508994	0.144	0.103	1.16209e-06	Spleen	N1
Mef2c	7.13016e-11	1.44079	0.144	0.106	1.74175e-06	Spleen	N1
Itga4	1.11081e-10	0.699799	0.137	0.099	2.7135e-06	Spleen	N1
Acvr1b	1.12284e-10	0.614042	0.12	0.082	2.74288e-06	Spleen	N1
Nrp1	1.14612e-10	0.566092	0.15	0.111	2.79974e-06	Spleen	N1
Ccdc124	1.38142e-10	0.557435	0.142	0.104	3.37454e-06	Spleen	N1
B3gat3	1.39722e-10	0.637751	0.122	0.085	3.41312e-06	Spleen	N1
Fam122a	2.37489e-10	0.585252	0.128	0.091	5.80137e-06	Spleen	N1
Gm36587	2.83721e-10	0.529155	0.149	0.11	6.93074e-06	Spleen	N1
Map3k20	2.8388e-10	0.522425	0.144	0.105	6.93462e-06	Spleen	N1
Shkbp1	3.30139e-10	0.557112	0.143	0.106	8.06463e-06	Spleen	N1
Erich1	3.3735e-10	0.586835	0.123	0.087	8.24078e-06	Spleen	N1
Nceh1	4.38229e-10	0.528682	0.142	0.105	1.07051e-05	Spleen	N1
Pde6h	4.69682e-10	0.673557	0.105	0.071	1.14734e-05	Spleen	N1
Prrc1	5.4379e-10	0.527166	0.138	0.102	1.32837e-05	Spleen	N1
Stard3	5.51273e-10	0.553697	0.134	0.097	1.34665e-05	Spleen	N1
Sgta	7.64423e-10	0.612976	0.119	0.084	1.86733e-05	Spleen	N1
Ttc32	9.49844e-10	0.509914	0.149	0.112	2.32028e-05	Spleen	N1
Plpp6	9.86011e-10	0.611897	0.116	0.081	2.40863e-05	Spleen	N1
Sh2b1	1.00422e-09	0.555785	0.143	0.108	2.45311e-05	Spleen	N1
Lman2l	1.33605e-09	0.647555	0.105	0.072	3.26371e-05	Spleen	N1
Gm56993	1.56667e-09	0.565448	0.131	0.095	3.82705e-05	Spleen	N1
Bad	1.70514e-09	0.553109	0.137	0.102	4.16532e-05	Spleen	N1
Gm5617	1.85003e-09	0.585961	0.122	0.087	4.51926e-05	Spleen	N1
Marveld1	2.01889e-09	0.636229	0.119	0.086	4.93175e-05	Spleen	N1
Abcd1	2.99952e-09	0.578355	0.126	0.092	7.32723e-05	Spleen	N1
Sap130	3.30268e-09	0.589326	0.108	0.075	8.06779e-05	Spleen	N1
Dpf2	3.75909e-09	0.570481	0.129	0.095	9.18271e-05	Spleen	N1
Polr2i	4.4251e-09	0.650872	0.108	0.076	0.000108096	Spleen	N1
Depdc1b	4.70839e-09	0.586795	0.121	0.087	0.000115017	Spleen	N1
Gm42659	5.1932e-09	0.583187	0.118	0.084	0.000126859	Spleen	N1
Arhgap23	6.58762e-09	0.622348	0.103	0.071	0.000160922	Spleen	N1
Pi4kb	7.31228e-09	0.546608	0.116	0.083	0.000178624	Spleen	N1
Sdccag8	7.98271e-09	0.556239	0.117	0.084	0.000195002	Spleen	N1
Adar	8.3025e-09	0.562404	0.115	0.082	0.000202813	Spleen	N1
Isca2	9.59531e-09	0.504311	0.141	0.108	0.000234394	Spleen	N1
Uhmk1	1.86825e-08	0.511461	0.131	0.098	0.000456377	Spleen	N1
Pigyl	1.91601e-08	0.527311	0.133	0.101	0.000468042	Spleen	N1
Lin28a	2.30671e-08	0.505135	0.135	0.103	0.000563483	Spleen	N1
Card9	2.82582e-08	0.506454	0.142	0.11	0.000690291	Spleen	N1
Rpl36a	3.38017e-08	0.557126	0.3	0.286	0.000825709	Spleen	N1
Faap20	3.97588e-08	0.555615	0.121	0.091	0.000971229	Spleen	N1
Slc30a7	4.08412e-08	0.533278	0.123	0.092	0.00099767	Spleen	N1
Acad8	4.77436e-08	0.601369	0.112	0.083	0.00116628	Spleen	N1
Mbd1	6.44836e-08	0.550174	0.113	0.083	0.0015752	Spleen	N1
Ppp1r9b	6.83628e-08	0.5426	0.116	0.086	0.00166997	Spleen	N1
Dpp3	6.87753e-08	0.572716	0.11	0.08	0.00168004	Spleen	N1
Gm7694	9.96313e-08	0.5471	0.112	0.083	0.00243379	Spleen	N1
Smim20	1.1431e-07	0.509017	0.127	0.098	0.00279238	Spleen	N1
Irf9	1.58618e-07	0.544162	0.113	0.083	0.00387472	Spleen	N1
Ubl7	1.69489e-07	0.522178	0.121	0.091	0.00414028	Spleen	N1
Tmem223	1.80823e-07	0.51185	0.116	0.087	0.00441714	Spleen	N1
Ccdc80	2.02425e-07	0.570344	0.115	0.085	0.00494484	Spleen	N1
Glmp	2.14141e-07	0.503985	0.121	0.092	0.00523105	Spleen	N1
Usf3	2.6225e-07	0.517796	0.108	0.08	0.00640625	Spleen	N1
Cog4	3.65905e-07	0.509241	0.115	0.086	0.00893833	Spleen	N1
Washc3	3.98123e-07	0.521531	0.107	0.08	0.00972535	Spleen	N1
Zfp830	4.39332e-07	0.514069	0.111	0.083	0.010732	Spleen	N1
Casp1	4.58212e-07	0.529099	0.108	0.08	0.0111932	Spleen	N1
Ncln	4.66192e-07	0.521338	0.115	0.087	0.0113881	Spleen	N1
Nploc4	5.73526e-07	0.545685	0.1	0.073	0.0140101	Spleen	N1
Arl6ip4	6.64084e-07	0.561642	0.105	0.078	0.0162222	Spleen	N1
Asl	6.90566e-07	0.530414	0.101	0.075	0.0168692	Spleen	N1
Ssr2	6.94444e-07	0.500352	0.112	0.085	0.0169639	Spleen	N1
Stx4a	1.00584e-06	0.533466	0.121	0.093	0.0245707	Spleen	N1
Hibch	1.12038e-06	0.50044	0.114	0.088	0.0273686	Spleen	N1
Foxp1	1.45021e-06	0.730438	0.207	0.288	0.0354256	Spleen	N1
Cxcl2	0	6.73311	0.93	0.161	0	Lung	N1
Clec4d	0	5.24041	0.909	0.14	0	Lung	N1
Acod1	0	5.94593	0.825	0.082	0	Lung	N1
Il1b	0	6.76099	0.745	0.052	0	Lung	N1
Smox	0	4.7607	0.745	0.092	0	Lung	N1
Cd14	0	5.36296	0.973	0.336	0	Lung	N1
Wfdc17	0	6.0444	0.67	0.067	0	Lung	N1
Slc7a11	0	3.81455	0.909	0.337	0	Lung	N1
Isy1	0	5.14301	0.584	0.049	0	Lung	N1
Ifitm1	0	5.72215	0.62	0.09	0	Lung	N1
Pla2g7	0	4.27977	0.545	0.07	0	Lung	N1
Tgm2	0	5.37442	0.498	0.031	0	Lung	N1
Spp1	0	7.01087	0.514	0.048	0	Lung	N1
Scgb1a1	0	10.8198	0.466	0.001	0	Lung	N1
Ccl4	0	7.02251	0.373	0.017	0	Lung	N1
Srgn	0	4.37573	0.998	0.73	0	Lung	N1
Fth1	0	3.09813	1	0.995	0	Lung	N1
Il1a	2.03899e-301	10.2806	0.157	0	4.98085e-297	Lung	N1
Fxyd5	9.02823e-301	2.98896	0.961	0.512	2.20542e-296	Lung	N1
Cebpb	1.79296e-294	2.79009	0.993	0.803	4.37984e-290	Lung	N1
Entpd1	2.29089e-294	3.71184	0.795	0.244	5.59618e-290	Lung	N1
Actg1	6.96226e-293	1.54291	0.998	0.999	1.70074e-288	Lung	N1
Dusp1	1.68939e-290	3.8685	0.739	0.192	4.12685e-286	Lung	N1
Lmnb1	4.05992e-289	2.50069	0.988	0.577	9.91758e-285	Lung	N1
Slc16a3	6.30338e-283	3.30846	0.873	0.365	1.53979e-278	Lung	N1
Hdc	2.26666e-279	2.55276	0.975	0.694	5.53701e-275	Lung	N1
Abca1	3.67452e-277	5.25644	0.286	0.016	8.97611e-273	Lung	N1
Eif1	1.51435e-273	1.5001	1	0.995	3.69925e-269	Lung	N1
Trf	1.19829e-266	4.60996	0.418	0.048	2.92717e-262	Lung	N1
S100a11	4.71215e-266	1.21145	1	1	1.15108e-261	Lung	N1
Pim1	3.62049e-264	3.80665	0.679	0.168	8.84414e-260	Lung	N1
Nlrp3	6.84849e-262	4.64311	0.45	0.059	1.67295e-257	Lung	N1
Ell2	4.58248e-261	3.68044	0.657	0.157	1.11941e-256	Lung	N1
Clec4e	3.07795e-259	2.76942	0.946	0.532	7.51881e-255	Lung	N1
Tpd52	1.52733e-256	2.82019	0.886	0.41	3.73095e-252	Lung	N1
Il1r2	7.41399e-255	2.83428	0.916	0.477	1.81109e-250	Lung	N1
Slc15a3	4.66557e-254	3.70368	0.541	0.098	1.13971e-249	Lung	N1
Antxr2	1.3244e-248	2.52697	0.973	0.731	3.23525e-244	Lung	N1
Ptgs2	4.65161e-248	6.32569	0.196	0.006	1.1363e-243	Lung	N1
Zeb2	2.39557e-246	3.81211	0.641	0.151	5.85189e-242	Lung	N1
Tpm4	1.10084e-245	3.29886	0.596	0.127	2.68914e-241	Lung	N1
Ifitm2	6.4706e-239	2.47732	0.977	0.867	1.58064e-234	Lung	N1
Btg1	1.53968e-237	2.14959	0.986	0.863	3.76114e-233	Lung	N1
Plek	2.93754e-236	2.90354	0.914	0.557	7.17583e-232	Lung	N1
Arg2	8.98e-236	3.29527	0.688	0.194	2.19363e-231	Lung	N1
Sgms2	5.4295e-233	2.27068	0.963	0.706	1.32632e-228	Lung	N1
Cd9	3.23127e-232	1.57396	0.993	0.97	7.89334e-228	Lung	N1
Cxcl3	3.18591e-231	7.21122	0.202	0.008	7.78254e-227	Lung	N1
Thbs1	1.29412e-223	3.27922	0.838	0.362	3.16128e-219	Lung	N1
H2-D1	1.07681e-222	1.89893	0.98	0.839	2.63042e-218	Lung	N1
Alcam	3.06817e-222	3.11313	0.846	0.371	7.49493e-218	Lung	N1
Grina	7.69969e-218	1.92619	0.961	0.713	1.88088e-213	Lung	N1
Traf1	4.79023e-215	5.60761	0.195	0.008	1.17016e-210	Lung	N1
Gpr35	1.57392e-214	7.18571	0.132	0.002	3.84477e-210	Lung	N1
Bcl2l11	2.43878e-213	3.13711	0.641	0.179	5.95744e-209	Lung	N1
Adam8	1.75906e-212	2.05919	0.936	0.607	4.29704e-208	Lung	N1
Ccl3	1.97353e-212	3.85643	0.521	0.104	4.82095e-208	Lung	N1
Cd44	4.69959e-212	1.86925	0.982	0.909	1.14802e-207	Lung	N1
Ccl6	6.85258e-210	4.26642	0.52	0.108	1.67395e-205	Lung	N1
Tinf2	1.12623e-205	4.17888	0.332	0.039	2.75115e-201	Lung	N1
Metrnl	4.70054e-202	3.94442	0.386	0.056	1.14825e-197	Lung	N1
Tyrobp	3.63864e-200	1.06772	1	0.998	8.88847e-196	Lung	N1
Srxn1	4.1704e-200	5.73574	0.164	0.006	1.01874e-195	Lung	N1
Trem1	1.22554e-197	2.31493	0.904	0.611	2.99374e-193	Lung	N1
Crem	4.98178e-192	4.24897	0.348	0.047	1.21695e-187	Lung	N1
Rdh12	1.4441e-189	3.08782	0.684	0.254	3.52764e-185	Lung	N1
Dgat1	5.67391e-189	2.14633	0.904	0.661	1.38602e-184	Lung	N1
Retnlg	2.21364e-188	2.26647	0.991	0.911	5.40748e-184	Lung	N1
Bcl2a1b	6.00033e-185	5.08667	0.223	0.016	1.46576e-180	Lung	N1
Pik3ap1	1.12985e-184	3.17476	0.707	0.288	2.76e-180	Lung	N1
Pmvk	8.78364e-184	3.89148	0.496	0.116	2.14567e-179	Lung	N1
Nr4a3	2.60556e-179	5.87017	0.143	0.005	6.36486e-175	Lung	N1
Klra2	2.22132e-178	3.53966	0.445	0.09	5.42625e-174	Lung	N1
Zfp36l1	9.1801e-175	3.95091	0.359	0.055	2.24252e-170	Lung	N1
Litaf	3.46163e-174	1.82511	0.923	0.685	8.45608e-170	Lung	N1
Arpc3	4.21924e-174	1.10845	0.998	0.991	1.03068e-169	Lung	N1
Slc25a3	5.3758e-174	2.40158	0.736	0.332	1.3132e-169	Lung	N1
Cd300ld	6.46742e-170	3.42364	0.409	0.078	1.57986e-165	Lung	N1
Stx11	1.54251e-168	2.15702	0.839	0.521	3.76805e-164	Lung	N1
Mefv	1.07703e-159	4.67558	0.205	0.017	2.63098e-155	Lung	N1
Grk5	1.18695e-157	4.52832	0.254	0.028	2.89948e-153	Lung	N1
Slpi	3.78127e-157	2.03347	0.968	0.89	9.23689e-153	Lung	N1
Sirpb1b	3.80539e-156	3.90284	0.323	0.049	9.2958e-152	Lung	N1
Map1lc3b	2.16233e-154	1.87368	0.909	0.775	5.28214e-150	Lung	N1
Rnf149	2.37479e-154	2.74775	0.671	0.283	5.80113e-150	Lung	N1
Tnfrsf1b	1.00727e-149	3.38831	0.421	0.095	2.46056e-145	Lung	N1
Isg20	1.78926e-148	3.77914	0.307	0.047	4.3708e-144	Lung	N1
Cnnm2	2.32613e-148	3.65047	0.316	0.05	5.68228e-144	Lung	N1
Gm41409	5.09472e-148	6.2719	0.114	0.003	1.24454e-143	Lung	N1
Cyp4f18	1.50423e-140	3.23598	0.527	0.164	3.67453e-136	Lung	N1
Cyth1	7.64376e-138	2.49076	0.602	0.234	1.86722e-133	Lung	N1
Ralgapa1	7.98103e-137	2.39822	0.743	0.42	1.94961e-132	Lung	N1
Cdkn1a	1.84515e-135	4.67614	0.173	0.014	4.50733e-131	Lung	N1
Ets2	2.66748e-135	2.35127	0.671	0.316	6.51611e-131	Lung	N1
Xylt1	9.22133e-135	2.2402	0.812	0.515	2.25259e-130	Lung	N1
Bcl2l1	2.41869e-134	3.2557	0.373	0.081	5.90836e-130	Lung	N1
Selenok	8.22051e-134	1.39052	0.943	0.842	2.00811e-129	Lung	N1
Rab8b	2.70106e-133	1.94597	0.832	0.58	6.59815e-129	Lung	N1
Clec7a	3.03592e-133	3.64422	0.357	0.073	7.41614e-129	Lung	N1
Tes	3.17221e-133	2.31318	0.693	0.354	7.74909e-129	Lung	N1
Nfkbia	6.41954e-132	2.01355	0.889	0.762	1.56817e-127	Lung	N1
Pdcd6	2.39234e-129	2.71159	0.714	0.425	5.844e-125	Lung	N1
Btbd9	2.43421e-128	2.23395	0.779	0.46	5.9463e-124	Lung	N1
Cd274	2.61146e-126	4.28321	0.205	0.023	6.37928e-122	Lung	N1
Irak2	1.33488e-125	2.60229	0.577	0.228	3.26085e-121	Lung	N1
Gm57477	1.06667e-124	4.21116	0.175	0.016	2.60566e-120	Lung	N1
Igfbp6	1.97393e-124	5.71089	0.102	0.003	4.82192e-120	Lung	N1
S100a6	5.29793e-124	1.14838	0.982	0.927	1.29418e-119	Lung	N1
Emilin2	5.88833e-124	2.37601	0.566	0.217	1.4384e-119	Lung	N1
Cstdc4	1.87116e-123	4.24314	0.314	0.058	4.57088e-119	Lung	N1
[truncated: 3,111 more rows]

## Sheet: Table 5 Primers
Target	Forward primer (5′ to 3′)	Reverse primer (5′ to 3′)
Actb	GTGACGTTGACATCCGTAAAGA	GCCGGACTCATCGTACTCC
Arg1	TGTCCCTAATGACAGCTCCTT	GCATCCACCCAAATGACACAT
Nos2	GTTCTCAGCCCAACAATACAAGA	GTGGACGGGTCGATGTCAC
